# Supplementary material for: Genomic epidemiology of SARS-CoV-2 in Mauritius reveals a new wave of infections dominated by the B.1.1.318, a variant under investigation
Source: bioRxiv or medRxiv preprint supplement (doi:10.1101/2021.06.16.21259017), 2021-06-16
Supplement: Supplementary file [file media-1.pdf]

We gratefully acknowledge the following Authors from the Originating laboratories responsible for obtaining the specimens, as well as the Submitting laboratories where the genome data were generated and shared via GISAID, on which this research is based.

All Submitters of data may be contacted directly via [www.gisaid.org](http://www.gisaid.org)

Authors are sorted alphabetically.

| Accession ID                     | Originating Laboratory                                                                                                                                                           | Submitting Laboratory                                                                              | Authors                                                                                                                                                                                                                                                                                                                                                                                                                                                                                                                                                                                                                                                                                                                                                                                                                                                                                                |
|----------------------------------|----------------------------------------------------------------------------------------------------------------------------------------------------------------------------------|----------------------------------------------------------------------------------------------------|--------------------------------------------------------------------------------------------------------------------------------------------------------------------------------------------------------------------------------------------------------------------------------------------------------------------------------------------------------------------------------------------------------------------------------------------------------------------------------------------------------------------------------------------------------------------------------------------------------------------------------------------------------------------------------------------------------------------------------------------------------------------------------------------------------------------------------------------------------------------------------------------------------|
| EPI_ISL_1001855                  | Viollier AG                                                                                                                                                                      | Department of Biosystems Science and Engineering, ETH Zürich                                       | Chaoran Chen, Sarah Nadeau, Catharine Aquino, Ivan Topolsky, Philipp Jablonski, Lara Fuhrmann, David Dreifuss, Katharina Jahn, Andreia Cabral de Gouvea, Maria Domenica Moccia, Simon Grüter, Timothy Sykes, Lennart Opitz, Griffin White, Laura Neff, Doris Popovic, Andrea Patrignani, Jay Tracy, Ralph Schlapbach, Christiane Beckmann, Maurice Redondo, Olivier Kobel, Christoph Noppen, Sophie Seidel, Noemie Santamaria de Souza, Niko Beerewinkel, Tanja Stadler                                                                                                                                                                                                                                                                                                                                                                                                                                |
| EPI_ISL_1017984                  | DOHMH Central Harlem                                                                                                                                                             | New York City Public Health Laboratory                                                             | Jade Wang, et al.                                                                                                                                                                                                                                                                                                                                                                                                                                                                                                                                                                                                                                                                                                                                                                                                                                                                                      |
| EPI_ISL_1018874                  | Lighthouse Lab in Cambridge                                                                                                                                                      | Wellcome Sanger Institute for the COVID-19 Genomics UK (COG-UK) Consortium                         | Rob Howes, The Lighthouse Lab in Cambridge and Alex Alderton, Roberto Amato, Jeffrey Barrett, Sonia Goncalves, Ewan Harrison, David K. Jackson, Ian Johnston, Dominic Kwiatkowski, Cordelia Langford, John Sillitoe on behalf of the Wellcome Sanger Institute COVID-19 Surveillance Team                                                                                                                                                                                                                                                                                                                                                                                                                                                                                                                                                                                                              |
| EPI_ISL_1037897                  | Laboratory Corporation of America                                                                                                                                                | Respiratory Viruses Branch, Division of Viral Diseases, Centers for Disease Control and Prevention | Peter W. Cook, Dakota Howard, Dhvani Batra, Ben L. Rambo-Martin, Clinton R. Paden, Suxiang Tong, Duncan MacCannell                                                                                                                                                                                                                                                                                                                                                                                                                                                                                                                                                                                                                                                                                                                                                                                     |
| EPI_ISL_1044836                  | Lighthouse Lab in Cambridge                                                                                                                                                      | Wellcome Sanger Institute for the COVID-19 Genomics UK (COG-UK) Consortium                         | Rob Howes, The Lighthouse Lab in Cambridge and Alex Alderton, Roberto Amato, Jeffrey Barrett, Sonia Goncalves, Ewan Harrison, David K. Jackson, Ian Johnston, Dominic Kwiatkowski, Cordelia Langford, John Sillitoe on behalf of the Wellcome Sanger Institute COVID-19 Surveillance Team                                                                                                                                                                                                                                                                                                                                                                                                                                                                                                                                                                                                              |
| EPI_ISL_1046767                  | SARS-CoV-2 testing team, National Institute of Infectious Diseases                                                                                                               | Pathogen Genomics Center, National Institute of Infectious Diseases                                | Tsuyoshi Sekizuka, Kentaro Itokawa, Rina Tanaka, Masanori Hashino, Minoru Nagi, Ken Miyazawa, Takashi Sakudoh, Nozomu Hanaoka, Tsuguto Fujimoto, Makoto Kuroda                                                                                                                                                                                                                                                                                                                                                                                                                                                                                                                                                                                                                                                                                                                                         |
| EPI_ISL_1057563                  | Lighthouse Lab in Milton Keynes                                                                                                                                                  | Wellcome Sanger Institute for the COVID-19 Genomics UK (COG-UK) Consortium                         | The Lighthouse Lab in Milton Keynes and Alex Alderton, Roberto Amato, Jeffrey Barrett, Sonia Goncalves, Ewan Harrison, David K. Jackson, Ian Johnston, Dominic Kwiatkowski, Cordelia Langford, John Sillitoe on behalf of the Wellcome Sanger Institute COVID-19 Surveillance Team                                                                                                                                                                                                                                                                                                                                                                                                                                                                                                                                                                                                                     |
| EPI_ISL_1058054, EPI_ISL_1058063 | Furst Medical Laboratory                                                                                                                                                         | Norwegian Institute of Public Health, Department of Virology                                       | Kathrine Stene-Johansen, Kamilla Heddeland Instefjord, Hilde Elshaug, Garcia Llorente Ignacio, Engebretsen Serina Beate Atiya R Ali, Marie Paulsen Madsen, Rasmus Riis Kopperud, Hilde Vollan, Karoline Bragstad, Olav Hungnes                                                                                                                                                                                                                                                                                                                                                                                                                                                                                                                                                                                                                                                                         |
| EPI_ISL_1058064                  | Norwegian Institute of Public Health, Department of Virology                                                                                                                     | Norwegian Institute of Public Health, Department of Virology                                       | Kathrine Stene-Johansen, Kamilla Heddeland Instefjord, Hilde Elshaug, Garcia Llorente Ignacio, Engebretsen Serina Beate Atiya R Ali, Marie Paulsen Madsen, Rasmus Riis Kopperud, Hilde Vollan, Karoline Bragstad, Olav Hungnes                                                                                                                                                                                                                                                                                                                                                                                                                                                                                                                                                                                                                                                                         |
| EPI_ISL_1058065                  | Akershus University Hospital, Department for Microbiology and Infectious Disease Control                                                                                         | Norwegian Institute of Public Health, Department of Virology                                       | Kathrine Stene-Johansen, Kamilla Heddeland Instefjord, Hilde Elshaug, Garcia Llorente Ignacio, Engebretsen Serina Beate Atiya R Ali, Marie Paulsen Madsen, Rasmus Riis Kopperud, Hilde Vollan, Karoline Bragstad, Olav Hungnes                                                                                                                                                                                                                                                                                                                                                                                                                                                                                                                                                                                                                                                                         |
| EPI_ISL_1061414                  | Vita Laboratoriot Oy                                                                                                                                                             | Institute of Biotechnology, DNA Sequencing and Genomics Laboratory, University of Helsinki         | Pia Laine, Ella Mustanoja, Annina Lyyski, Anne Ylisen, Lars Paulin, Petri Auvinen, Hanna Nihtilä, Taru Meri, Jukka Hurme, Sakari Jokiranta                                                                                                                                                                                                                                                                                                                                                                                                                                                                                                                                                                                                                                                                                                                                                             |
| EPI_ISL_1064797                  | DOHMH Chelsea                                                                                                                                                                    | New York City Public Health Laboratory                                                             | Jade Wang, et al.                                                                                                                                                                                                                                                                                                                                                                                                                                                                                                                                                                                                                                                                                                                                                                                                                                                                                      |
| EPI_ISL_1069470                  | Lighthouse Lab in Milton Keynes                                                                                                                                                  | Wellcome Sanger Institute for the COVID-19 Genomics UK (COG-UK) Consortium                         | The Lighthouse Lab in Milton Keynes and Alex Alderton, Roberto Amato, Jeffrey Barrett, Sonia Goncalves, Ewan Harrison, David K. Jackson, Ian Johnston, Dominic Kwiatkowski, Cordelia Langford, John Sillitoe on behalf of the Wellcome Sanger Institute COVID-19 Surveillance Team                                                                                                                                                                                                                                                                                                                                                                                                                                                                                                                                                                                                                     |
| EPI_ISL_1099127                  | Lighthouse Lab in Alderley Park                                                                                                                                                  | Wellcome Sanger Institute for the COVID-19 Genomics UK (COG-UK) Consortium                         | Jacquelyn Wynn, Mairead Hyland, The Lighthouse Lab in Alderley Park and Alex Alderton, Roberto Amato, Jeffrey Barrett, Sonia Goncalves, Ewan Harrison, David K. Jackson, Ian Johnston, Dominic Kwiatkowski, Cordelia Langford, John Sillitoe on behalf of the Wellcome Sanger Institute COVID-19 Surveillance Team                                                                                                                                                                                                                                                                                                                                                                                                                                                                                                                                                                                     |
| EPI_ISL_1099502                  | Lighthouse Lab in Glasgow                                                                                                                                                        | Wellcome Sanger Institute for the COVID-19 Genomics UK (COG-UK) Consortium                         | Harper VanSteenhouse, Yumi Kasai, David Gray, Carol Clugston, Anna Dominiczak and Alex Alderton, Roberto Amato, Jeffrey Barrett, Sonia Goncalves, Ewan Harrison, David K. Jackson, Ian Johnston, Dominic Kwiatkowski, Cordelia Langford, John Sillitoe on behalf of the Wellcome Sanger Institute COVID-19 Surveillance Team                                                                                                                                                                                                                                                                                                                                                                                                                                                                                                                                                                           |
| EPI_ISL_1101646                  | Lighthouse Lab in Alderley Park                                                                                                                                                  | Wellcome Sanger Institute for the COVID-19 Genomics UK (COG-UK) Consortium                         | Jacquelyn Wynn, Mairead Hyland, The Lighthouse Lab in Alderley Park and Alex Alderton, Roberto Amato, Jeffrey Barrett, Sonia Goncalves, Ewan Harrison, David K. Jackson, Ian Johnston, Dominic Kwiatkowski, Cordelia Langford, John Sillitoe on behalf of the Wellcome Sanger Institute COVID-19 Surveillance Team                                                                                                                                                                                                                                                                                                                                                                                                                                                                                                                                                                                     |
| EPI_ISL_1104055                  | Virology Department, Sheffield Teaching Hospitals NHS Foundation Trust/Department of Infection, Immunity and Cardiovascular Disease, The Medical School, University of Sheffield | COVID-19 Genomics UK (COG-UK) Consortium                                                           | Thushan de Silva, Matthew Parker, Nikki Smith, Adri Agyal, Rebecca Brown, Luke Green, Rachel Tucker, Paul Parsons, Danielle Groves, Katie Johnson, Laura Carrilero, Alex Keeley, Dave Partridge, Matthew Wyles, Benjamin Lindsey, Mehmet Yavuz, Mohammad Raza, Cariad Evans                                                                                                                                                                                                                                                                                                                                                                                                                                                                                                                                                                                                                            |
| EPI_ISL_1104995                  | University College London Hospital                                                                                                                                               | COVID-19 Genomics UK (COG-UK) Consortium                                                           | Judith Heaney, Matthew Byott, Catherine Houlihan, Dan Frampton, Stuart Kirk, Moira Spyer and Eleni Nastouli                                                                                                                                                                                                                                                                                                                                                                                                                                                                                                                                                                                                                                                                                                                                                                                            |
| EPI_ISL_1108247, EPI_ISL_1108425 | Quadram Institute Bioscience                                                                                                                                                     | COVID-19 Genomics UK (COG-UK) Consortium                                                           | Dave J. Baker, Gemma L. Kay, Alp Aydin, Thanh Le-Viet, Steven Rudder, Ana P. Tedim, Anastasia Kolyva, Maria Diaz, Leonardo de Oliveira Martins, Nabil-Fareed Alikhan, Lizzie Meadows, Rachael Stanley, Ngozi Elumogo, Muhammed Yasir, Nicholas M. Thomson, Alexander J Trotter, Rachel Gilroy, Samuel Bloomfield, Claire Stuart, Andrew Bell, Reenesht Prakash, Samir Dervisevic, Alison E. Mather, John Wain, Mark Webber, Andrew J. Page, Justin O'Grady                                                                                                                                                                                                                                                                                                                                                                                                                                             |
| EPI_ISL_1115652                  | Lighthouse Lab in Glasgow                                                                                                                                                        | Wellcome Sanger Institute for the COVID-19 Genomics UK (COG-UK) Consortium                         | Harper VanSteenhouse, Yumi Kasai, David Gray, Carol Clugston, Anna Dominiczak and Alex Alderton, Roberto Amato, Jeffrey Barrett, Sonia Goncalves, Ewan Harrison, David K. Jackson, Ian Johnston, Dominic Kwiatkowski, Cordelia Langford, John Sillitoe on behalf of the Wellcome Sanger Institute COVID-19 Surveillance Team                                                                                                                                                                                                                                                                                                                                                                                                                                                                                                                                                                           |
| EPI_ISL_1125467, EPI_ISL_1125953 | Department of Virus and Microbiological Special Diagnostics, Statens Serum Institut, Copenhagen, Denmark                                                                         | Aalborg University                                                                                 | Danish Covid-19 Genome Consortium                                                                                                                                                                                                                                                                                                                                                                                                                                                                                                                                                                                                                                                                                                                                                                                                                                                                      |
| EPI_ISL_1132604                  | National Virus Reference Laboratory                                                                                                                                              | National Virus Reference Laboratory                                                                | Zoe Yandle, Charlene Bennet, Gabriel Gonzalez, Michael Carr, Jonathan Dean, Cillian F De Gascun                                                                                                                                                                                                                                                                                                                                                                                                                                                                                                                                                                                                                                                                                                                                                                                                        |
| EPI_ISL_1141270, EPI_ISL_1143158 | Bioscientia Labor Wermsdorf                                                                                                                                                      | Robert Koch Institute                                                                              | unknown                                                                                                                                                                                                                                                                                                                                                                                                                                                                                                                                                                                                                                                                                                                                                                                                                                                                                                |
| EPI_ISL_1162673                  | Laboratory Corporation of America                                                                                                                                                | Respiratory Viruses Branch, Division of Viral Diseases, Centers for Disease Control and Prevention | Peter W. Cook, Dakota Howard, Dhvani Batra, Ben L. Rambo-Martin, Minoo Agarwal, Eyad Almasri Debbie Boles, Ayla Burns, Nuthawin Charoensri, Oren Cohen, Susan Countryman, Mary Ann Cristobal, Bobbi Croy, Suzanne Dale, Hrushikesh Deshmukh, Amanda Douglas, Vincent Drouillon, Marcia Eisenberg, Howard Engler, Rama Ghatti, Prashant Gupta, Susan Hicks, Jake Humphrey, Lax Iyer, Manoj Jain, Mohan Kolli, Brian Krueger, Tim Kuphal, Stanley Letovsky, Michael Levandoski, Craig Lukasik, Jonathan Meltzer, Brian Norvell, Mindy Nye, Scott Parker, Christos Petropoulos, John Pruitt, Steven Ragan, Scott Ryan, Mike Sapeta, Jana Schroth, Suresh Babu Selvaraju, Goran Stevovic, Amanda Suchanek, Andrea Throop, Lyndon Tilson, Thomas Urban, Joe Voshell, Kimberly Wagner, Jonathan Williams, Mary Williamson, Qian Zeng, Tricia Zwiefelhofer, Clinton R. Paden, Suxiang Tong, Duncan MacCannell |
| EPI_ISL_1167277                  | Maryland Public Health Laboratory                                                                                                                                                | Maryland Public Health Laboratory                                                                  | Maryland Department of Health Laboratories Administration                                                                                                                                                                                                                                                                                                                                                                                                                                                                                                                                                                                                                                                                                                                                                                                                                                              |
| EPI_ISL_1171782                  | Johns Hopkins Hospital Department of Pathology                                                                                                                                   | Johns Hopkins Hospital Department of Pathology                                                     | C. Paul Morris, Chun Huai Luo, Adannaya Amadi, Matthew Schwartz, Nicholas Gallagher, Heba H. Mostafa                                                                                                                                                                                                                                                                                                                                                                                                                                                                                                                                                                                                                                                                                                                                                                                                   |
| EPI_ISL_1173063                  | Pandemic Response Lab - NYC                                                                                                                                                      | Pandemic Response Lab, R&D                                                                         | Henry Lee, Michael Hammerling, Melissa Hopkins, Cybill del Castillo, Shinyoung Clair Kang, William Ward, Pradeep Bugga, Haiping Hao, Jon Laurent                                                                                                                                                                                                                                                                                                                                                                                                                                                                                                                                                                                                                                                                                                                                                       |
| EPI_ISL_1173225                  | Nigeria Centre for Disease Control (NCDC)                                                                                                                                        | African Centre for Excellence for Genomics of Infectious                                           | Olawoye, I.B., et al                                                                                                                                                                                                                                                                                                                                                                                                                                                                                                                                                                                                                                                                                                                                                                                                                                                                                   |

|                                                                                                                                                                                           |                                                                                                                         |                                                                                           |                                                                                                                                                                                                                                                                                                                                                                                                                                                                                                                                                                                                                                                                                                                                                                                                                                                                                                         |
|-------------------------------------------------------------------------------------------------------------------------------------------------------------------------------------------|-------------------------------------------------------------------------------------------------------------------------|-------------------------------------------------------------------------------------------|---------------------------------------------------------------------------------------------------------------------------------------------------------------------------------------------------------------------------------------------------------------------------------------------------------------------------------------------------------------------------------------------------------------------------------------------------------------------------------------------------------------------------------------------------------------------------------------------------------------------------------------------------------------------------------------------------------------------------------------------------------------------------------------------------------------------------------------------------------------------------------------------------------|
|                                                                                                                                                                                           |                                                                                                                         | Diseases (ACEGID), Redeemer's University                                                  |                                                                                                                                                                                                                                                                                                                                                                                                                                                                                                                                                                                                                                                                                                                                                                                                                                                                                                         |
| EPI_ISL_1174395                                                                                                                                                                           | Lighthouse Lab in Cambridge                                                                                             | Wellcome Sanger Institute for the COVID-19 Genomics UK (COG-UK) Consortium                | Rob Howes, The Lighthouse Lab in Cambridge and Alex Alderton, Roberto Amato, Jeffrey Barrett, Sonia Goncalves, Ewan Harrison, David K. Jackson, Ian Johnston, Dominic Kwiatkowski, Cordelia Langford, John Sillitoe on behalf of the Wellcome Sanger Institute COVID-19 Surveillance Team                                                                                                                                                                                                                                                                                                                                                                                                                                                                                                                                                                                                               |
| EPI_ISL_1176648                                                                                                                                                                           | Department of Pathology, University of Cambridge                                                                        | COVID-19 Genomics UK (COG-UK) Consortium                                                  | Aminu S. Jahun, Yasmin Chaudhry, Iliana Georgana, Myra Hosmillo, Rhys Izuagbe, William L. Hamilton, Martin D. Curran, Surendra Parmar, Ian Goodfellow                                                                                                                                                                                                                                                                                                                                                                                                                                                                                                                                                                                                                                                                                                                                                   |
| EPI_ISL_1180300                                                                                                                                                                           | National Virus Reference Laboratory                                                                                     | National Virus Reference Laboratory                                                       | Guerrino Macori, Gabriel Gonzalez, Michael Carr, Zoe Yandle, Charlene Bennett, Jonathan Dean, Seamus Fanning, Cillian F De Gascun                                                                                                                                                                                                                                                                                                                                                                                                                                                                                                                                                                                                                                                                                                                                                                       |
| EPI_ISL_1189893                                                                                                                                                                           | Lighthouse Lab in Cambridge                                                                                             | Wellcome Sanger Institute for the COVID-19 Genomics UK (COG-UK) Consortium                | Rob Howes, The Lighthouse Lab in Cambridge and Alex Alderton, Roberto Amato, Jeffrey Barrett, Sonia Goncalves, Ewan Harrison, David K. Jackson, Ian Johnston, Dominic Kwiatkowski, Cordelia Langford, John Sillitoe on behalf of the Wellcome Sanger Institute COVID-19 Surveillance Team                                                                                                                                                                                                                                                                                                                                                                                                                                                                                                                                                                                                               |
| EPI_ISL_1191623                                                                                                                                                                           | DC Public Health Lab/ Dept. of Forensic Sciences                                                                        | DC Public Health Lab/ Dept. of Forensic Sciences                                          | Janis Doss, Scott Nguyen, Elizabeth Zelaya, Sarah Scott, Connie Maza, Monica Mann, Brittany Hamilton, David Payne, Jocelyn Hauser                                                                                                                                                                                                                                                                                                                                                                                                                                                                                                                                                                                                                                                                                                                                                                       |
| EPI_ISL_1192229                                                                                                                                                                           | Hospital of Southern Norway - Kristiansand, Department of Medical Microbiology                                          | Norwegian Institute of Public Health, Department of Virology                              | Kathrine Stene-Johansen, Kamilla Heddeland Instefjord, Hilde Elshaug, Garcia Lorente Ignacio, Engebretsen Serina Beate, Pedersen Benedikte Nevjen, Debech Nadia, Atiya R Ali, Marie Paulsen Madsen, Rasmus Riis Kopperud, Hilde Vollan, Karoline Bragstad, Olav Hungnes                                                                                                                                                                                                                                                                                                                                                                                                                                                                                                                                                                                                                                 |
| EPI_ISL_1192230                                                                                                                                                                           | Furst Medical Laboratory                                                                                                | Norwegian Institute of Public Health, Department of Virology                              | Kathrine Stene-Johansen, Kamilla Heddeland Instefjord, Hilde Elshaug, Garcia Lorente Ignacio, Engebretsen Serina Beate, Pedersen Benedikte Nevjen, Debech Nadia, Atiya R Ali, Marie Paulsen Madsen, Rasmus Riis Kopperud, Hilde Vollan, Karoline Bragstad, Olav Hungnes                                                                                                                                                                                                                                                                                                                                                                                                                                                                                                                                                                                                                                 |
| EPI_ISL_1205743                                                                                                                                                                           | Lighthouse Lab in Milton Keynes                                                                                         | Wellcome Sanger Institute for the COVID-19 Genomics UK (COG-UK) Consortium                | The Lighthouse Lab in Milton Keynes and Alex Alderton, Roberto Amato, Jeffrey Barrett, Sonia Goncalves, Ewan Harrison, David K. Jackson, Ian Johnston, Dominic Kwiatkowski, Cordelia Langford, John Sillitoe on behalf of the Wellcome Sanger Institute COVID-19 Surveillance Team                                                                                                                                                                                                                                                                                                                                                                                                                                                                                                                                                                                                                      |
| EPI_ISL_1215257                                                                                                                                                                           | Synlab MVZ Augsburg                                                                                                     | Robert Koch Institute                                                                     | unknown                                                                                                                                                                                                                                                                                                                                                                                                                                                                                                                                                                                                                                                                                                                                                                                                                                                                                                 |
| EPI_ISL_1221508                                                                                                                                                                           | Laboratory Corporation of America                                                                                       | Centers for Disease Control and Prevention Division of Viral Diseases, Pathogen Discovery | Peter W. Cook, Dakota Howard, Dhvani Batra, Ben L. Rambo-Martin, Minoo Agarwal, Eyad Almasri, Debbie Boles, Ayla Burns, Nuthawin Charoensri, Oren Cohen, Susan Countryman, Mary Ann Cristobal, Bobbi Croy, Suzanne Dale, Hrushikesh Deshmukh, Amanda Douglas, Vincent Drouillon, Marcia Eisenberg, Howard Engler, Rama Ghatti, Prashant Gupta, Susan Hicks, Jake Humphrey, Lax Iyer, Manoj Jain, Mohan Kolli, Brian Krueger, Tim Kuphal, Stanley Letovsky, Michael Levandoski, Craig Lukasik, Jonathan Meltzer, Brian Norvell, Mindy Nye, Scott Parker, Christos Petropoulos, John Pruitt, Steven Ragan, Scott Ryan, Mike Sapeta, Jana Schroth, Suresh Babu Selvaraju, Goran Stevovic, Amanda Suchanek, Andrea Throop, Lyndon Tilson, Thomas Urban, Joe Voshell, Kimberly Wagner, Jonathan Williams, Mary Williamson, Qian Zeng, Tricia Zwiefelhofer, Clinton R. Paden, Suziang Tong, Duncan MacCannell |
| EPI_ISL_1223831                                                                                                                                                                           | Lighthouse Lab in Milton Keynes                                                                                         | Wellcome Sanger Institute for the COVID-19 Genomics UK (COG-UK) Consortium                | The Lighthouse Lab in Milton Keynes and Alex Alderton, Roberto Amato, Jeffrey Barrett, Sonia Goncalves, Ewan Harrison, David K. Jackson, Ian Johnston, Dominic Kwiatkowski, Cordelia Langford, John Sillitoe on behalf of the Wellcome Sanger Institute COVID-19 Surveillance Team                                                                                                                                                                                                                                                                                                                                                                                                                                                                                                                                                                                                                      |
| EPI_ISL_1238827, EPI_ISL_1238828                                                                                                                                                          | MD PHL                                                                                                                  | MD PHL                                                                                    | Maryland Department of Health Laboratories Administration                                                                                                                                                                                                                                                                                                                                                                                                                                                                                                                                                                                                                                                                                                                                                                                                                                               |
| EPI_ISL_1238950                                                                                                                                                                           | Johns Hopkins Hospital Department of Pathology                                                                          | Johns Hopkins Hospital Department of Pathology                                            | C. Paul Morris, Chun Hui Luo, Adannaya Amadi, Matthew Schwartz, Nicholas Gallagher, Heba H. Mostafa                                                                                                                                                                                                                                                                                                                                                                                                                                                                                                                                                                                                                                                                                                                                                                                                     |
| EPI_ISL_1241762                                                                                                                                                                           | St. Nikolaus-Hospital Eupen                                                                                             | GIGA Medical Genomics                                                                     | Keith Durkin, Maria Artesi, Sébastien Bontems, Raphaël Boreux, Bouchra Boujemla, Nathalie Renotte, Cécile Meex, Pierrette Melin, Marie-Pierre Hayette, Vincent Bours                                                                                                                                                                                                                                                                                                                                                                                                                                                                                                                                                                                                                                                                                                                                    |
| EPI_ISL_1242074, EPI_ISL_1244948, EPI_ISL_1244987, EPI_ISL_1244991                                                                                                                        | Lighthouse Lab in Cambridge                                                                                             | Wellcome Sanger Institute for the COVID-19 Genomics UK (COG-UK) Consortium                | Rob Howes, The Lighthouse Lab in Cambridge and Alex Alderton, Roberto Amato, Jeffrey Barrett, Sonia Goncalves, Ewan Harrison, David K. Jackson, Ian Johnston, Dominic Kwiatkowski, Cordelia Langford, John Sillitoe on behalf of the Wellcome Sanger Institute COVID-19 Surveillance Team                                                                                                                                                                                                                                                                                                                                                                                                                                                                                                                                                                                                               |
| EPI_ISL_1247731, EPI_ISL_1247734, EPI_ISL_1247735                                                                                                                                         | Virology Department, Royal Infirmary of Edinburgh, NHS Lothian / School of Biological Sciences, University of Edinburgh | COVID-19 Genomics UK (COG-UK) Consortium                                                  | McHugh M, Dewar R, Cotton S, Rooke S, O'Toole A, Scher E, Hill V, McCrone JT, Colquhoun R, Yu X, Jackson B, Rambaut A, Templeton K                                                                                                                                                                                                                                                                                                                                                                                                                                                                                                                                                                                                                                                                                                                                                                      |
| EPI_ISL_1252104, EPI_ISL_1252315, EPI_ISL_1252316, EPI_ISL_1252317, EPI_ISL_1252318                                                                                                       | National Virus Reference Laboratory                                                                                     | National Virus Reference Laboratory                                                       | Zoe Yandle, Charlene Bennett, Gabriel Gonzalez, Michael Carr, Jonathan Dean, Cillian F De Gascun                                                                                                                                                                                                                                                                                                                                                                                                                                                                                                                                                                                                                                                                                                                                                                                                        |
| EPI_ISL_1252546, EPI_ISL_1252547                                                                                                                                                          | Furst Medical Laboratory                                                                                                | Norwegian Institute of Public Health, Department of Virology                              | Kathrine Stene-Johansen, Kamilla Heddeland Instefjord, Hilde Elshaug, Garcia Lorente Ignacio, Jon Bråte, Engebretsen Serina Beate, Pedersen Benedikte Nevjen, Debech Nadia, Atiya R Ali, Marie Paulsen Madsen, Rasmus Riis Kopperud, Hilde Vollan, Karoline Bragstad, Olav Hungnes                                                                                                                                                                                                                                                                                                                                                                                                                                                                                                                                                                                                                      |
| EPI_ISL_1256402, EPI_ISL_1256978                                                                                                                                                          | Lighthouse Lab in Cambridge                                                                                             | Wellcome Sanger Institute for the COVID-19 Genomics UK (COG-UK) Consortium                | Rob Howes, The Lighthouse Lab in Cambridge and Alex Alderton, Roberto Amato, Jeffrey Barrett, Sonia Goncalves, Ewan Harrison, David K. Jackson, Ian Johnston, Dominic Kwiatkowski, Cordelia Langford, John Sillitoe on behalf of the Wellcome Sanger Institute COVID-19 Surveillance Team                                                                                                                                                                                                                                                                                                                                                                                                                                                                                                                                                                                                               |
| EPI_ISL_1257885, EPI_ISL_1257886                                                                                                                                                          | Hopital Général de Douala                                                                                               | Institut Pasteur de Dakar                                                                 | Njoum Richard, Digne Moussa Moïse, Dia Ndongo, Diallo Amadou, Sankhe Safietou, Diop Mamadou, Loucoubar Cheikh, Elisabeth Carniel, Faye Ousmane, Sall Amadou Alpha                                                                                                                                                                                                                                                                                                                                                                                                                                                                                                                                                                                                                                                                                                                                       |
| EPI_ISL_1258627, EPI_ISL_1258628, EPI_ISL_1258644                                                                                                                                         | Pandemic Response Lab - NYC                                                                                             | Pandemic Response Lab, R&D                                                                | Henry Lee, Michael Hammerling, Melissa Hopkins, Cybill del Castillo, Shinyoung Clair Kang, William Ward, Pradeep Bugga, Haiping Hao, Jon Laurent                                                                                                                                                                                                                                                                                                                                                                                                                                                                                                                                                                                                                                                                                                                                                        |
| EPI_ISL_1259229                                                                                                                                                                           | Platform BIS UZA/UAntwerpen                                                                                             | UAntwerp, Laboratory of Medical Microbiology                                              | Basil Britto Xavier, Jasmine Coppens, Marie Le Mercier, Christine Lammens, Veerle Matheeußen, Herman Goossens                                                                                                                                                                                                                                                                                                                                                                                                                                                                                                                                                                                                                                                                                                                                                                                           |
| EPI_ISL_1259240                                                                                                                                                                           | Algemeen Medisch Laboratorium (AML)                                                                                     | UAntwerp, Laboratory of Medical Microbiology                                              | Basil Britto Xavier, Jasmine Coppens, Marie Le Mercier, Christine Lammens, Veerle Matheeußen, Herman Goossens                                                                                                                                                                                                                                                                                                                                                                                                                                                                                                                                                                                                                                                                                                                                                                                           |
| EPI_ISL_1259241                                                                                                                                                                           | Platform BIS UZA/UAntwerpen                                                                                             | UAntwerp, Laboratory of Medical Microbiology                                              | Basil Britto Xavier, Jasmine Coppens, Marie Le Mercier, Christine Lammens, Veerle Matheeußen, Herman Goossens                                                                                                                                                                                                                                                                                                                                                                                                                                                                                                                                                                                                                                                                                                                                                                                           |
| EPI_ISL_1261812, EPI_ISL_1261813                                                                                                                                                          | DOHMH Corona                                                                                                            | New York City Public Health Laboratory                                                    | Jade Wang, et al.                                                                                                                                                                                                                                                                                                                                                                                                                                                                                                                                                                                                                                                                                                                                                                                                                                                                                       |
| EPI_ISL_1262808                                                                                                                                                                           | Labo Analyses Med                                                                                                       | National Reference Center for Viruses of Respiratory Infections, Institut Pasteur, Paris  | Marion Barbet, Sylvie Behillil, Méline Bizard, Angela Brisebarre, Camille Capel, Etienne Simon-Lorière, Vincent Enouf, Maud Vanpeene, Sylvie van der Werf, Potiron Grégoire                                                                                                                                                                                                                                                                                                                                                                                                                                                                                                                                                                                                                                                                                                                             |
| EPI_ISL_1263870, EPI_ISL_1263888, EPI_ISL_1263892, EPI_ISL_1263936, EPI_ISL_1263939, EPI_ISL_1275633, EPI_ISL_1275646, EPI_ISL_1275740, EPI_ISL_1275927, EPI_ISL_1276025, EPI_ISL_1276082 | see above                                                                                                               | Lighthouse Lab in Cambridge                                                               | Wellcome Sanger Institute for the COVID-19 Genomics UK (COG-UK) Consortium                                                                                                                                                                                                                                                                                                                                                                                                                                                                                                                                                                                                                                                                                                                                                                                                                              |
| EPI_ISL_1276142, EPI_ISL_1276344                                                                                                                                                          | Lighthouse Lab in Milton Keynes                                                                                         | Wellcome Sanger Institute for the COVID-19 Genomics UK (COG-UK) Consortium                | The Lighthouse Lab in Milton Keynes and Alex Alderton, Roberto Amato, Jeffrey Barrett, Sonia Goncalves, Ewan Harrison, David K. Jackson, Ian Johnston, Dominic Kwiatkowski, Cordelia Langford, John Sillitoe on behalf of the Wellcome Sanger Institute COVID-19 Surveillance Team                                                                                                                                                                                                                                                                                                                                                                                                                                                                                                                                                                                                                      |
| EPI_ISL_1279100                                                                                                                                                                           | Department of Virology and Immunology, University of Helsinki and Helsinki University Hospital, Huslab Finland          | Department of Virology, Faculty of Medicine, University of Helsinki, Finland              | Teemu Smura, Ravi Kant, Phuoc Truong, Hussein Alburkat, Hannimari Kallio-Kokko, Jenni Virtanen, Maija Suvanto, Essi Korhonen, Sari Hannula, Harri Kangas, Hanna Liimatainen, Satu Kurkela, Hanna Jarva, Maija Lappalainen, Pekka Eilonen, Olli Yapaalahti                                                                                                                                                                                                                                                                                                                                                                                                                                                                                                                                                                                                                                               |
| EPI_ISL_1280969                                                                                                                                                                           | Synlab MVZ Augsburg                                                                                                     | Robert Koch Institute                                                                     | unknown                                                                                                                                                                                                                                                                                                                                                                                                                                                                                                                                                                                                                                                                                                                                                                                                                                                                                                 |
| EPI_ISL_1281035                                                                                                                                                                           | SYNLAB MVZ Weiden                                                                                                       | Robert Koch Institute                                                                     | unknown                                                                                                                                                                                                                                                                                                                                                                                                                                                                                                                                                                                                                                                                                                                                                                                                                                                                                                 |
| EPI_ISL_1282222                                                                                                                                                                           | Bioscientia Labor Wermsdorf                                                                                             | Robert Koch Institute                                                                     | unknown                                                                                                                                                                                                                                                                                                                                                                                                                                                                                                                                                                                                                                                                                                                                                                                                                                                                                                 |
| EPI_ISL_1283817                                                                                                                                                                           | MVZ Labor Dr. Limbach & Kollegen GbR                                                                                    | Robert Koch Institute                                                                     | unknown                                                                                                                                                                                                                                                                                                                                                                                                                                                                                                                                                                                                                                                                                                                                                                                                                                                                                                 |
| EPI_ISL_1284578, EPI_ISL_1284670, EPI_ISL_1284849                                                                                                                                         | Bioscientia MVZ Labor Karlsruhe GmbH                                                                                    | Robert Koch Institute                                                                     | unknown                                                                                                                                                                                                                                                                                                                                                                                                                                                                                                                                                                                                                                                                                                                                                                                                                                                                                                 |
| EPI_ISL_1285370, EPI_ISL_1285379                                                                                                                                                          | Labor Prof. Dr. G. Enders MVZ GbR                                                                                       | Robert Koch Institute                                                                     | unknown                                                                                                                                                                                                                                                                                                                                                                                                                                                                                                                                                                                                                                                                                                                                                                                                                                                                                                 |
| EPI_ISL_1285416                                                                                                                                                                           | MVZ Labor Krone GbR                                                                                                     | Robert Koch Institute                                                                     | unknown                                                                                                                                                                                                                                                                                                                                                                                                                                                                                                                                                                                                                                                                                                                                                                                                                                                                                                 |
| EPI_ISL_1287332, EPI_ISL_1287333                                                                                                                                                          | Labor Becker & Kollegen (Standort München)                                                                              | Robert Koch Institute                                                                     | unknown                                                                                                                                                                                                                                                                                                                                                                                                                                                                                                                                                                                                                                                                                                                                                                                                                                                                                                 |
| EPI_ISL_1290855, EPI_ISL_1290856                                                                                                                                                          | Microbiology Division, South Carolina Department of Health                                                              | Microbiology Division, South Carolina Department of Health                                | Hayley Flores, Jessica Freeman                                                                                                                                                                                                                                                                                                                                                                                                                                                                                                                                                                                                                                                                                                                                                                                                                                                                          |

|                                                                                                                                                                                                            |                                                                                                                         |                                                                                           |                                                                                                                                                                                                                                                                                                                                                                                                                                                                                                                                                                                                                                                                                                                                                                                                                                                                                                        |
|------------------------------------------------------------------------------------------------------------------------------------------------------------------------------------------------------------|-------------------------------------------------------------------------------------------------------------------------|-------------------------------------------------------------------------------------------|--------------------------------------------------------------------------------------------------------------------------------------------------------------------------------------------------------------------------------------------------------------------------------------------------------------------------------------------------------------------------------------------------------------------------------------------------------------------------------------------------------------------------------------------------------------------------------------------------------------------------------------------------------------------------------------------------------------------------------------------------------------------------------------------------------------------------------------------------------------------------------------------------------|
|                                                                                                                                                                                                            | and Environmental Control Public Health Laboratory (SC DHEC PHL)                                                        | and Environmental Control Public Health Laboratory (SC DHEC PHL)                          |                                                                                                                                                                                                                                                                                                                                                                                                                                                                                                                                                                                                                                                                                                                                                                                                                                                                                                        |
| EPI_ISL_1305903                                                                                                                                                                                            | Johns Hopkins Hospital Department of Pathology                                                                          | Johns Hopkins Hospital Department of Pathology                                            | C. Paul Morris, Chun Huai Luo, Adannaya Amadi, Matthew Schwartz, Heba H. Mostafa                                                                                                                                                                                                                                                                                                                                                                                                                                                                                                                                                                                                                                                                                                                                                                                                                       |
| EPI_ISL_1306284, EPI_ISL_1307327, EPI_ISL_1307366, EPI_ISL_1307367                                                                                                                                         | Pandemic Response Lab - NYC                                                                                             | Pandemic Response Lab, R&D                                                                | Henry Lee, Michael Hammerling, Melissa Hopkins, Cybill del Castillo, Shinyoung Clair Kang, William Ward, Pradeep Bugga, Sol Rey, Dylan Law, Haiping Hao, Jon Laurent                                                                                                                                                                                                                                                                                                                                                                                                                                                                                                                                                                                                                                                                                                                                   |
| EPI_ISL_1308762                                                                                                                                                                                            | Virology Department, Royal Infirmary of Edinburgh, NHS Lothian / School of Biological Sciences, University of Edinburgh | COVID-19 Genomics UK (COG-UK) Consortium                                                  | McHugh M, Dewar R, Cotton S, Rooke S, O'Toole Á, Scher E, Hill V, McCrone JT, Colquhoun R, Yu X, Jackson B, Rambaut A, Templeton K                                                                                                                                                                                                                                                                                                                                                                                                                                                                                                                                                                                                                                                                                                                                                                     |
| EPI_ISL_1309730                                                                                                                                                                                            | Queens Medical Centre, Clinical Microbiology Department / DeepSeq Nottingham                                            | COVID-19 Genomics UK (COG-UK) Consortium                                                  | Gemma Clark, Wendy Smith, Manjinder Khakh, Vicki M Fleming, Michelle M Lister, Hannah Howson-Wells, Jonathan Ball, Timothy Byaruhanga, Jayasree Dey, Emily Park, Jack Hill, Patrick McClure, Joseph Chappell, Theocharis Tsoleridis, Nadine Holmes, Matthew Carlisle, Christopher Moore, Fei Sang, Johnny Debebe, Victoria Wright, Matthew Loose                                                                                                                                                                                                                                                                                                                                                                                                                                                                                                                                                       |
| EPI_ISL_1316006, EPI_ISL_1316118                                                                                                                                                                           | Lighthouse Lab in Cambridge                                                                                             | Wellcome Sanger Institute for the COVID-19 Genomics UK (COG-UK) Consortium                | Rob Howes, The Lighthouse Lab in Cambridge and Alex Alderton, Roberto Amato, Jeffrey Barrett, Sonia Goncalves, Ewan Harrison, David K. Jackson, Ian Johnston, Dominic Kwiatkowski, Cordelia Langford, John Sillitoe on behalf of the Wellcome Sanger Institute COVID-19 Surveillance Team                                                                                                                                                                                                                                                                                                                                                                                                                                                                                                                                                                                                              |
| EPI_ISL_1317614, EPI_ISL_1317615                                                                                                                                                                           | Furst Medical Laboratory                                                                                                | Norwegian Institute of Public Health, Department of Virology                              | Kathrine Stene-Johansen, Kamilla Heddeland Instefjord, Hilde Elshaug, Garcia Llorente Ignacio, Jon Bråte, Engebretsen Serina Beate, Pedersen Benedikte Nevjen, Debech Nadia, Atiya R Ali, Marie Paulsen Madsen, Rasmus Riis Kopperud, Hilde Vollan, Karoline Bragstad, Olav Hungnes                                                                                                                                                                                                                                                                                                                                                                                                                                                                                                                                                                                                                    |
| EPI_ISL_1321320                                                                                                                                                                                            | Laboratory Corporation of America                                                                                       | Centers for Disease Control and Prevention Division of Viral Diseases, Pathogen Discovery | Peter W. Cook, Dakota Howard, Dhvani Batra, Ben L. Rambo-Martin, Minoo Agarwal, Eyad Almasri, Debbie Boles, Ayla Burns, Nuthawin Charoensri, Oren Cohen, Susan Countryman, Mary Ann Cristobal, Bobbi Croy, Suzanne Dale, Hrushikesh Deshmukh, Amanda Douglas, Vincent Drouillon, Marcia Eisenberg, Howard Engler, Rama Gharti, Prashant Gupta, Susan Hicks, Jake Humphrey, Lax Iyer, Manoj Jain, Mohan Koli, Brian Krueger, Tim Kuphal, Stanley Letovsky, Michael Levandoski, Craig Lukasik, Jonathan Meltzer, Brian Norvell, Mindy Nye, Scott Parker, Christos Petropoulos, John Pruitt, Steven Ragan, Scott Ryan, Mike Sapeta, Jana Schroth, Suresh Babu Selvaraju, Goran Stevovic, Amanda Suchanek, Andrea Throop, Lyndon Tilson, Thomas Urban, Joe Voshell, Kimberly Wagner, Jonathan Williams, Mary Williamson, Qian Zeng, Tricia Zwiefelhofer, Clinton R. Paden, Suxiang Tong, Duncan MacCannell |
| EPI_ISL_1325884                                                                                                                                                                                            | Lighthouse Lab in Milton Keynes                                                                                         | Wellcome Sanger Institute for the COVID-19 Genomics UK (COG-UK) Consortium                | The Lighthouse Lab in Milton Keynes and Alex Alderton, Roberto Amato, Jeffrey Barrett, Sonia Goncalves, Ewan Harrison, David K. Jackson, Ian Johnston, Dominic Kwiatkowski, Cordelia Langford, John Sillitoe on behalf of the Wellcome Sanger Institute COVID-19 Surveillance Team                                                                                                                                                                                                                                                                                                                                                                                                                                                                                                                                                                                                                     |
| EPI_ISL_1327380, EPI_ISL_1327412, EPI_ISL_1327437, EPI_ISL_1327456, EPI_ISL_1327511, EPI_ISL_1327531, EPI_ISL_1327591, EPI_ISL_1327599, EPI_ISL_1328907, EPI_ISL_1329271, EPI_ISL_1329346, EPI_ISL_1329381 | Lighthouse Lab in Cambridge                                                                                             | Wellcome Sanger Institute for the COVID-19 Genomics UK (COG-UK) Consortium                | Rob Howes, The Lighthouse Lab in Cambridge and Alex Alderton, Roberto Amato, Jeffrey Barrett, Sonia Goncalves, Ewan Harrison, David K. Jackson, Ian Johnston, Dominic Kwiatkowski, Cordelia Langford, John Sillitoe on behalf of the Wellcome Sanger Institute COVID-19 Surveillance Team                                                                                                                                                                                                                                                                                                                                                                                                                                                                                                                                                                                                              |
| EPI_ISL_1329872                                                                                                                                                                                            | Lighthouse Lab in Milton Keynes                                                                                         | Wellcome Sanger Institute for the COVID-19 Genomics UK (COG-UK) Consortium                | The Lighthouse Lab in Milton Keynes and Alex Alderton, Roberto Amato, Jeffrey Barrett, Sonia Goncalves, Ewan Harrison, David K. Jackson, Ian Johnston, Dominic Kwiatkowski, Cordelia Langford, John Sillitoe on behalf of the Wellcome Sanger Institute COVID-19 Surveillance Team                                                                                                                                                                                                                                                                                                                                                                                                                                                                                                                                                                                                                     |
| EPI_ISL_1330550, EPI_ISL_1331341                                                                                                                                                                           | Lighthouse Lab in Alderley Park                                                                                         | Wellcome Sanger Institute for the COVID-19 Genomics UK (COG-UK) Consortium                | Jacquelyn Wynn, Mairead Hyland, The Lighthouse Lab in Alderley Park and Alex Alderton, Roberto Amato, Jeffrey Barrett, Sonia Goncalves, Ewan Harrison, David K. Jackson, Ian Johnston, Dominic Kwiatkowski, Cordelia Langford, John Sillitoe on behalf of the Wellcome Sanger Institute COVID-19 Surveillance Team                                                                                                                                                                                                                                                                                                                                                                                                                                                                                                                                                                                     |
| EPI_ISL_1332658, EPI_ISL_1332834                                                                                                                                                                           | Lighthouse Lab in Cambridge                                                                                             | Wellcome Sanger Institute for the COVID-19 Genomics UK (COG-UK) Consortium                | Rob Howes, The Lighthouse Lab in Cambridge and Alex Alderton, Roberto Amato, Jeffrey Barrett, Sonia Goncalves, Ewan Harrison, David K. Jackson, Ian Johnston, Dominic Kwiatkowski, Cordelia Langford, John Sillitoe on behalf of the Wellcome Sanger Institute COVID-19 Surveillance Team                                                                                                                                                                                                                                                                                                                                                                                                                                                                                                                                                                                                              |
| EPI_ISL_1333032, EPI_ISL_1333120, EPI_ISL_1333467                                                                                                                                                          | Lighthouse Lab in Glasgow                                                                                               | Wellcome Sanger Institute for the COVID-19 Genomics UK (COG-UK) Consortium                | Harper VanSteenhouse, Yumi Kasai, David Gray, Carol Clugston, Anna Dominiczak and Alex Alderton, Roberto Amato, Jeffrey Barrett, Sonia Goncalves, Ewan Harrison, David K. Jackson, Ian Johnston, Dominic Kwiatkowski, Cordelia Langford, John Sillitoe on behalf of the Wellcome Sanger Institute COVID-19 Surveillance Team                                                                                                                                                                                                                                                                                                                                                                                                                                                                                                                                                                           |
| EPI_ISL_1333543                                                                                                                                                                                            | Lighthouse Lab in Cambridge                                                                                             | Wellcome Sanger Institute for the COVID-19 Genomics UK (COG-UK) Consortium                | Rob Howes, The Lighthouse Lab in Cambridge and Alex Alderton, Roberto Amato, Jeffrey Barrett, Sonia Goncalves, Ewan Harrison, David K. Jackson, Ian Johnston, Dominic Kwiatkowski, Cordelia Langford, John Sillitoe on behalf of the Wellcome Sanger Institute COVID-19 Surveillance Team                                                                                                                                                                                                                                                                                                                                                                                                                                                                                                                                                                                                              |
| EPI_ISL_1336301, EPI_ISL_1336302, EPI_ISL_1336303                                                                                                                                                          | MD PHL                                                                                                                  | MD PHL                                                                                    | Maryland Department of Health Laboratories Administration                                                                                                                                                                                                                                                                                                                                                                                                                                                                                                                                                                                                                                                                                                                                                                                                                                              |
| EPI_ISL_1341932                                                                                                                                                                                            | Lighthouse Lab in Glasgow                                                                                               | Wellcome Sanger Institute for the COVID-19 Genomics UK (COG-UK) Consortium                | Harper VanSteenhouse, Yumi Kasai, David Gray, Carol Clugston, Anna Dominiczak and Alex Alderton, Roberto Amato, Jeffrey Barrett, Sonia Goncalves, Ewan Harrison, David K. Jackson, Ian Johnston, Dominic Kwiatkowski, Cordelia Langford, John Sillitoe on behalf of the Wellcome Sanger Institute COVID-19 Surveillance Team                                                                                                                                                                                                                                                                                                                                                                                                                                                                                                                                                                           |
| EPI_ISL_1344706                                                                                                                                                                                            | Randox Laboratories                                                                                                     | Wellcome Sanger Institute for the COVID-19 Genomics UK (COG-UK) Consortium                | Randox Laboratories and Alex Alderton, Roberto Amato, Jeffrey Barrett, Sonia Goncalves, Ewan Harrison, David K. Jackson, Ian Johnston, Dominic Kwiatkowski, Cordelia Langford, John Sillitoe on behalf of the Wellcome Sanger Institute COVID-19 Surveillance Team                                                                                                                                                                                                                                                                                                                                                                                                                                                                                                                                                                                                                                     |
| EPI_ISL_1346238                                                                                                                                                                                            | Lighthouse Lab in Milton Keynes                                                                                         | Wellcome Sanger Institute for the COVID-19 Genomics UK (COG-UK) Consortium                | The Lighthouse Lab in Milton Keynes and Alex Alderton, Roberto Amato, Jeffrey Barrett, Sonia Goncalves, Ewan Harrison, David K. Jackson, Ian Johnston, Dominic Kwiatkowski, Cordelia Langford, John Sillitoe on behalf of the Wellcome Sanger Institute COVID-19 Surveillance Team                                                                                                                                                                                                                                                                                                                                                                                                                                                                                                                                                                                                                     |
| EPI_ISL_1351910                                                                                                                                                                                            | SYNLAB MVZ Leinfelden-Echterdingen                                                                                      | Robert Koch Institute                                                                     | unknown                                                                                                                                                                                                                                                                                                                                                                                                                                                                                                                                                                                                                                                                                                                                                                                                                                                                                                |
| EPI_ISL_1353397                                                                                                                                                                                            | Labormedizin Darmstadt                                                                                                  | Robert Koch Institute                                                                     | unknown                                                                                                                                                                                                                                                                                                                                                                                                                                                                                                                                                                                                                                                                                                                                                                                                                                                                                                |
| EPI_ISL_1353652, EPI_ISL_1353660, EPI_ISL_1353683, EPI_ISL_1353875, EPI_ISL_1353913, EPI_ISL_1353928, EPI_ISL_1353965                                                                                      | Bioscientia MVZ Labor Karlsruhe GmbH                                                                                    | Robert Koch Institute                                                                     | unknown                                                                                                                                                                                                                                                                                                                                                                                                                                                                                                                                                                                                                                                                                                                                                                                                                                                                                                |
| EPI_ISL_1357417                                                                                                                                                                                            | SYNLAB MVZ Leinfelden-Echterdingen                                                                                      | Robert Koch Institute                                                                     | unknown                                                                                                                                                                                                                                                                                                                                                                                                                                                                                                                                                                                                                                                                                                                                                                                                                                                                                                |
| EPI_ISL_1358214                                                                                                                                                                                            | Department of Virology I, National Institute of Infectious Diseases                                                     | Department of Veterinary Science, National Institute of Infectious Diseases               | Yudai Kuroda, Tsukasa Yamamoto, Keita Ishijima, Tadaki Suzuki, Souichi Yamada, Shuetsu Fukushi, Ken Maeda                                                                                                                                                                                                                                                                                                                                                                                                                                                                                                                                                                                                                                                                                                                                                                                              |
| EPI_ISL_1361229                                                                                                                                                                                            | Viollier AG                                                                                                             | Department of Biosystems Science and Engineering, ETH Zürich                              | Christian Beisel, Sarah Nadeau, Chaoran Chen, Ivan Topolsky, Philipp Jablonski, Lara Fuhrmann, David Dreifuss, Katharina Jahn, Rebecca Denes, Mirjam Feldkamp, Ina Nissen, Natascha Santacroce, Elodie Burcklen, Christiane Beckmann, Maurice Redondo, Olivier Kobel, Christoph Noppen, Sophie Seidel, Noemie Santamaria de Souza, Niko Beerewinkel, Tanja Stadler                                                                                                                                                                                                                                                                                                                                                                                                                                                                                                                                     |
| EPI_ISL_1361866                                                                                                                                                                                            | Landesamt für Verbraucherschutz Sachsen Anhalt, Magdeburg                                                               | Institute of Medical Microbiology and Hospital Hygiene                                    | Prof. Dr. Achim Kaasch, Aljoscha Tersteegen                                                                                                                                                                                                                                                                                                                                                                                                                                                                                                                                                                                                                                                                                                                                                                                                                                                            |
| EPI_ISL_1365728                                                                                                                                                                                            | Virginia Division of Consolidated Laboratory Services                                                                   | Virginia Division of Consolidated Laboratory Services                                     | Virginia DCLS                                                                                                                                                                                                                                                                                                                                                                                                                                                                                                                                                                                                                                                                                                                                                                                                                                                                                          |
| EPI_ISL_1371593                                                                                                                                                                                            | Dutch COVID-19 response team                                                                                            | National Institute for Public Health and the Environment (RIVM)                           | Adam Meijer, Harry Vennema, Dirk Eggink, Jeroen Cremer, Sharon van den Brink, Bas van der Veer, AnneMarie van den Brandt, Florian Zwagemaker, Dennis Schmitz, Chantal Reusken, on behalf of the national COVID-19 response team                                                                                                                                                                                                                                                                                                                                                                                                                                                                                                                                                                                                                                                                        |
| EPI_ISL_1374123, EPI_ISL_1374204, EPI_ISL_1377042                                                                                                                                                          | Lighthouse Lab in Cambridge                                                                                             | Wellcome Sanger Institute for the COVID-19 Genomics UK (COG-UK) Consortium                | Rob Howes, The Lighthouse Lab in Cambridge and Alex Alderton, Roberto Amato, Jeffrey Barrett, Sonia Goncalves, Ewan Harrison, David K. Jackson, Ian Johnston, Dominic Kwiatkowski, Cordelia Langford, John Sillitoe on behalf of the Wellcome Sanger Institute COVID-19 Surveillance Team                                                                                                                                                                                                                                                                                                                                                                                                                                                                                                                                                                                                              |
| EPI_ISL_1378565                                                                                                                                                                                            | Lighthouse Lab in Glasgow                                                                                               | Wellcome Sanger Institute for the COVID-19 Genomics UK (COG-UK) Consortium                | Harper VanSteenhouse, Yumi Kasai, David Gray, Carol Clugston, Anna Dominiczak and Alex Alderton, Roberto Amato, Jeffrey Barrett, Sonia Goncalves, Ewan Harrison, David K. Jackson, Ian Johnston, Dominic Kwiatkowski, Cordelia Langford, John Sillitoe on behalf of the Wellcome Sanger Institute COVID-19 Surveillance Team                                                                                                                                                                                                                                                                                                                                                                                                                                                                                                                                                                           |
| EPI_ISL_1381262                                                                                                                                                                                            | Platform BIS UZA/UAntwerpen                                                                                             | UAntwerp, Laboratory of Medical Microbiology                                              | Basil Britto Xavier, Jasmine Coppens, Marie Le Mercier, Christine Lammens, Veerle Matheeußen, Herman Goossens                                                                                                                                                                                                                                                                                                                                                                                                                                                                                                                                                                                                                                                                                                                                                                                          |
| EPI_ISL_1381947                                                                                                                                                                                            | Department of Clinical Microbiology                                                                                     | GIGA Medical Genomics                                                                     | Keith Durkin, Maria Artesi, Sébastien Bontems, Raphaël Boreux, Bouchra Boujemla, Nathalie Renotte, Cécile Meex, Pierrette Melin, Marie-Pierre Hayette,                                                                                                                                                                                                                                                                                                                                                                                                                                                                                                                                                                                                                                                                                                                                                 |

| EPI_ISL                                                            | Country                                                                                     | Institution                                                                                 | Principal Investigator                                                                                                                                | Co-Investigator | Co-Investigator                                                                                                                                                                                                                                                                                                              |
|--------------------------------------------------------------------|---------------------------------------------------------------------------------------------|---------------------------------------------------------------------------------------------|-------------------------------------------------------------------------------------------------------------------------------------------------------|-----------------|------------------------------------------------------------------------------------------------------------------------------------------------------------------------------------------------------------------------------------------------------------------------------------------------------------------------------|
| EPI_ISL_1382169, EPI_ISL_1382443                                   | KU Leuven                                                                                   | Rega Institute, Clinical and Epidemiological Virology                                       | KU Leuven, Rega Institute, Clinical and Epidemiological Virology                                                                                      | Vincent Bours   | Tony Wawina-Bokalanga, Bert Vanmechelen, Joan Marti-Carerras, Piet Maes                                                                                                                                                                                                                                                      |
| EPI_ISL_1384646                                                    |                                                                                             | UAB InMedica                                                                                | Vilnius University Hospital Santaros Klinikos, Center of Laboratory Medicine                                                                          |                 | Dovile Ezerskyte, Daniel Naumovas, Gytis Dudas, Ingrida Olenraite, Rimvydas Norvilas, Ligit Raugaite, Monika Katenaite, Mindaugas Stokus, Laimonas Griskevicius                                                                                                                                                              |
| EPI_ISL_1385022, EPI_ISL_1385033, EPI_ISL_1385661                  |                                                                                             | Pandemic Response Lab - NYC                                                                 | Pandemic Response Lab, R&D                                                                                                                            |                 | Henry Lee, Michael Hammerling, Melissa Hopkins, Cybill del Castillo, Shinyoung Clair Kang, William Ward, Pradeep Bugga, Sol Rey, Dylan Law, Haiping Hao, Jon Laurent                                                                                                                                                         |
| EPI_ISL_1396529                                                    |                                                                                             | Public Health Virology-Forensic and Scientific Services (PHV-FSS)                           | Public Health Virology-Forensic and Scientific Services (PHV-FSS)                                                                                     |                 | Son Nguyen                                                                                                                                                                                                                                                                                                                   |
| EPI_ISL_1396629                                                    | 1. Główny Inspektorat Sanitarny. 2. Diagnostyka. Laboratoria Medyczne.                      |                                                                                             | 1. ViroGenetics - BSL3 Laboratory of Virology, Maopolska Centre of Biotechnology, Jagiellonian University; 2. Diagnostyka Laboratoria Lukasz Rabalski |                 | Lukasz Rabalski, Tomasz Gromowski, Tomasz Duda, Natalia Mazur-Panasiuk, Andrzej Horban, Piotr Zabek, Maciej Kosinski, Natalia Derewonko, Sylwia Januszczak, Krzysztof Pyc                                                                                                                                                    |
| EPI_ISL_1400372                                                    |                                                                                             | UW Virology Lab                                                                             | UW Virology Lab                                                                                                                                       |                 | Pavitra Roychoudhury, Hong Xie, Lasata Shrestha, Shah Mohamed Bakhsh, Michelle Lin, Noah R. Baker, Sean Ellis, Saraswathi Sathees, Meei-Li Huang, Keith R Jerome, Alexander Greninger                                                                                                                                        |
| EPI_ISL_1400873, EPI_ISL_1400941                                   | Maryland Genomics, Institute for Genome Sciences, University of Maryland School of Medicine | Maryland Genomics, Institute for Genome Sciences, University of Maryland School of Medicine |                                                                                                                                                       |                 | Tallon, Luke J; Sadzewicz, Lisa D; Humphrys, Mike; Ott, Sandra; Roussey, Holly; Mehta, Aditya; Vavikolanu, Kranthi; Fraser, Claire M; Ravel, Jacques                                                                                                                                                                         |
| EPI_ISL_1402432, EPI_ISL_1402433                                   |                                                                                             | National Virus Reference Laboratory                                                         | National Virus Reference Laboratory                                                                                                                   |                 | Zoe Yandle, Charlene Bennet, Gabriel Gonzalez, Michael Carr, Jonathan Dean, Cillian F De Gascun                                                                                                                                                                                                                              |
| EPI_ISL_1402782, EPI_ISL_1402783                                   |                                                                                             | National Virus Reference Laboratory                                                         | National Virus Reference Laboratory                                                                                                                   |                 | Zoe Yandle, Charlene Bennett, Gabriel Gonzalez, Michael Carr, Jonathan Dean, Cillian F De Gascun                                                                                                                                                                                                                             |
| EPI_ISL_1402817, EPI_ISL_1402878                                   |                                                                                             | Johns Hopkins Hospital Department of Pathology                                              | Johns Hopkins Hospital Department of Pathology                                                                                                        |                 | C. Paul Morris, Chun Huai Luo, Adannaya Amadi, Matthew Schwartz, Heba H. Mostafa                                                                                                                                                                                                                                             |
| EPI_ISL_1403780                                                    |                                                                                             | Cerballiance site les Clays                                                                 | Cerba Lab                                                                                                                                             |                 | Lecorche E, Haim-Boukobza S, Olivi M, Benazra M, Trombert-Paolantoni S, Roquebert B                                                                                                                                                                                                                                          |
| EPI_ISL_1404144                                                    |                                                                                             | Cerballiance IDFest                                                                         | Cerba Lab                                                                                                                                             |                 | Roquebert B, Trombert-Paolantoni S, Benazra M, Olivi M, Lecorche E, Haim-Boukobza S                                                                                                                                                                                                                                          |
| EPI_ISL_1404221, EPI_ISL_1404222                                   |                                                                                             | Lab voor klinische biologie                                                                 | Lab voor klinische biologie                                                                                                                           |                 | Marija Janevska, Hannelore Hamerlinck, Bruno Verhasselt                                                                                                                                                                                                                                                                      |
| EPI_ISL_1405091                                                    |                                                                                             | UW Virology Lab                                                                             | UW Virology Lab                                                                                                                                       |                 | Pavitra Roychoudhury, Hong Xie, Lasata Shrestha, Shah Mohamed Bakhsh, Michelle Lin, Noah R. Baker, Sean Ellis, Saraswathi Sathees, Meei-Li Huang, Keith R Jerome, Alexander Greninger                                                                                                                                        |
| EPI_ISL_1405583                                                    |                                                                                             | Johns Hopkins Hospital Department of Pathology                                              | Johns Hopkins Hospital Department of Pathology                                                                                                        |                 | C. Paul Morris, Chun Huai Luo, Adannaya Amadi, Matthew Schwartz, Heba H. Mostafa                                                                                                                                                                                                                                             |
| EPI_ISL_1409684, EPI_ISL_1409739, EPI_ISL_1410152, EPI_ISL_1410208 |                                                                                             | Lighthouse Lab in Cambridge                                                                 | Wellcome Sanger Institute for the COVID-19 Genomics UK (COG-UK) Consortium                                                                            |                 | Rob Howes, The Lighthouse Lab in Cambridge and Alex Alderton, Roberto Amato, Jeffrey Barrett, Sonia Goncalves, Ewan Harrison, David K. Jackson, Ian Johnston, Dominic Kwiatkowski, Cordelia Langford, John Sillitoe on behalf of the Wellcome Sanger Institute COVID-19 Surveillance Team                                    |
| EPI_ISL_1411607, EPI_ISL_1412868                                   |                                                                                             | Lighthouse Lab in Glasgow                                                                   | Wellcome Sanger Institute for the COVID-19 Genomics UK (COG-UK) Consortium                                                                            |                 | Harper VanSteenhouse, Yumi Kasai, David Gray, Carol Clugston, Anna Dominiczak and Alex Alderton, Roberto Amato, Jeffrey Barrett, Sonia Goncalves, Ewan Harrison, David K. Jackson, Ian Johnston, Dominic Kwiatkowski, Cordelia Langford, John Sillitoe on behalf of the Wellcome Sanger Institute COVID-19 Surveillance Team |
| EPI_ISL_1415519                                                    |                                                                                             | Lighthouse Lab in Alderley Park                                                             | Wellcome Sanger Institute for the COVID-19 Genomics UK (COG-UK) Consortium                                                                            |                 | Jacquelyn Wynn, Mairead Hyland, The Lighthouse Lab in Alderley Park and Alex Alderton, Roberto Amato, Jeffrey Barrett, Sonia Goncalves, Ewan Harrison, David K. Jackson, Ian Johnston, Dominic Kwiatkowski, Cordelia Langford, John Sillitoe on behalf of the Wellcome Sanger Institute COVID-19 Surveillance Team           |
| EPI_ISL_1416323, EPI_ISL_1416324, EPI_ISL_1416325                  |                                                                                             | PathWest Laboratory Medicine WA                                                             | PathWest Laboratory Medicine WA Microbial Surveillance Unit                                                                                           |                 | PathWest Laboratory Medicine WA Microbial Surveillance Unit                                                                                                                                                                                                                                                                  |
| EPI_ISL_1416962                                                    |                                                                                             | Labo Analyses Med                                                                           | National Reference Center for Viruses of Respiratory Infections, Institut Pasteur, Paris                                                              |                 | Marion Barbet, Sylvie Behillil, Méline Bizard, Frédéric Lemoine, Corinne Maufrais, Christophe Malabat, Angela Brisebarre, Camille Capel, Louise Lefrançois, Etienne Simon-Lorière, Vincent Enouf, Maud Vanpeene, Sylvie van der Werf, Ronan Pichard                                                                          |
| EPI_ISL_1417047                                                    |                                                                                             | Labo Analyses Med                                                                           | National Reference Center for Viruses of Respiratory Infections, Institut Pasteur, Paris                                                              |                 | Marion Barbet, Sylvie Behillil, Méline Bizard, Frédéric Lemoine, Corinne Maufrais, Christophe Malabat, Angela Brisebarre, Camille Capel, Louise Lefrançois, Etienne Simon-Lorière, Vincent Enouf, Maud Vanpeene, Sylvie van der Werf, Sophie Chalmir                                                                         |
| EPI_ISL_1417051                                                    |                                                                                             | Labo Analyses Med                                                                           | National Reference Center for Viruses of Respiratory Infections, Institut Pasteur, Paris                                                              |                 | Marion Barbet, Sylvie Behillil, Méline Bizard, Frédéric Lemoine, Corinne Maufrais, Christophe Malabat, Angela Brisebarre, Camille Capel, Louise Lefrançois, Etienne Simon-Lorière, Vincent Enouf, Maud Vanpeene, Sylvie van der Werf, Jean-François Comes                                                                    |
| EPI_ISL_1421570                                                    |                                                                                             | Wisconsin State Laboratory of Hygiene Communicable Disease Division                         | Wisconsin State Laboratory of Hygiene Communicable Disease Division                                                                                   |                 | Kelsey R. Florek, Abigail C. Shockey                                                                                                                                                                                                                                                                                         |
| EPI_ISL_1423122                                                    |                                                                                             | Berkeley Medical Center                                                                     | WVU and Marshall University Combined Genomics Core Facilities                                                                                         |                 | "James Denvir, Peter Stoilov, Peter Perrotta, Wesley Kimble, Ryan Percifield"                                                                                                                                                                                                                                                |
| EPI_ISL_1433129, EPI_ISL_1433144, EPI_ISL_1433192                  |                                                                                             | Bioscientia MVZ Labor Karlsruhe GmbH                                                        | Robert Koch Institute                                                                                                                                 |                 | unknown                                                                                                                                                                                                                                                                                                                      |
| EPI_ISL_1436437, EPI_ISL_1436444                                   |                                                                                             | Limbach - MVZ Humangenetik Ulm                                                              | Robert Koch Institute                                                                                                                                 |                 | unknown                                                                                                                                                                                                                                                                                                                      |
| EPI_ISL_1438754                                                    |                                                                                             | Bioscientia Labor Wermisdorf                                                                | Robert Koch Institute                                                                                                                                 |                 | unknown                                                                                                                                                                                                                                                                                                                      |
| EPI_ISL_1439243                                                    |                                                                                             | Bioscientia MVZ Labor Karlsruhe GmbH                                                        | Robert Koch Institute                                                                                                                                 |                 | unknown                                                                                                                                                                                                                                                                                                                      |
| EPI_ISL_1439769                                                    |                                                                                             | Med. Labor Prof. Schenk Dr. Ansorge & Kollegen                                              | Robert Koch Institute                                                                                                                                 |                 | unknown                                                                                                                                                                                                                                                                                                                      |
| EPI_ISL_1441652                                                    |                                                                                             | MVZ Labor Dr. Limbach & Kollegen GbR                                                        | Robert Koch Institute                                                                                                                                 |                 | unknown                                                                                                                                                                                                                                                                                                                      |
| EPI_ISL_1441657                                                    |                                                                                             | Limbach - MVZ Labor Eveld & Kollegen Essen                                                  | Robert Koch Institute                                                                                                                                 |                 | unknown                                                                                                                                                                                                                                                                                                                      |
| EPI_ISL_1442822, EPI_ISL_1442823, EPI_ISL_1442882                  |                                                                                             | SYNLAB MVZ Leinfelden-Echterdingen                                                          | Robert Koch Institute                                                                                                                                 |                 | unknown                                                                                                                                                                                                                                                                                                                      |
| EPI_ISL_1442953                                                    |                                                                                             | National Public Health Laboratory, National Centre for Infectious Diseases                  | National Public Health Laboratory, National Centre for Infectious Diseases                                                                            |                 | Tze Minn Mak, Zhenyang Zhou, Grace Jie Yin Ngan, Royce Ang, Lin Cui, Raymond Tzer Pin Lin                                                                                                                                                                                                                                    |
| EPI_ISL_1443362                                                    |                                                                                             | Lab voor klinische biologie                                                                 | Lab voor klinische biologie                                                                                                                           |                 | Marija Janevska, Hannelore Hamerlinck, Bruno Verhasselt                                                                                                                                                                                                                                                                      |
| EPI_ISL_1444851                                                    |                                                                                             | Maryland Genomics, Institute for Genome Sciences, University of Maryland School of Medicine | Maryland Genomics, Institute for Genome Sciences, University of Maryland School of Medicine                                                           |                 | Tallon, Luke J; Sadzewicz, Lisa D; Humphrys, Mike; Ott, Sandra; Roussey, Holly; Mehta, Aditya; Vavikolanu, Kranthi; Fraser, Claire M; Ravel, Jacques                                                                                                                                                                         |
| EPI_ISL_1446366                                                    |                                                                                             | Texas Children's Hospital                                                                   | Texas Children's Microbiome Center                                                                                                                    |                 | Ruth Ann Luna, Jennifer K. Spinler, James Dunn, James Versalovic, Ila Singh                                                                                                                                                                                                                                                  |
| EPI_ISL_1447143                                                    |                                                                                             | Rocketteller University Hospital                                                            | New York City Public Health Laboratory                                                                                                                |                 | Jade Wang, et al.                                                                                                                                                                                                                                                                                                            |
| EPI_ISL_1448426, EPI_ISL_1448427, EPI_ISL_1448428                  |                                                                                             | PathWest Laboratory Medicine WA                                                             | PathWest Laboratory Medicine WA Microbial Surveillance Unit                                                                                           |                 | PathWest Laboratory Medicine WA Microbial Surveillance Unit                                                                                                                                                                                                                                                                  |
| EPI_ISL_1450369, EPI_ISL_1450571                                   |                                                                                             | Lighthouse Lab in Milton Keynes                                                             | Wellcome Sanger Institute for the COVID-19 Genomics UK (COG-UK) Consortium                                                                            |                 | The Lighthouse Lab in Milton Keynes and Alex Alderton, Roberto Amato, Jeffrey Barrett, Sonia Goncalves, Ewan Harrison, David K. Jackson, Ian Johnston, Dominic Kwiatkowski, Cordelia Langford, John Sillitoe on behalf of the Wellcome Sanger Institute COVID-19 Surveillance Team                                           |
| EPI_ISL_1451239                                                    |                                                                                             | Lighthouse Lab in Cambridge                                                                 | Wellcome Sanger Institute for the COVID-19 Genomics UK (COG-UK) Consortium                                                                            |                 | Rob Howes, The Lighthouse Lab in Cambridge and Alex Alderton, Roberto Amato, Jeffrey Barrett, Sonia Goncalves, Ewan Harrison, David K. Jackson, Ian Johnston, Dominic Kwiatkowski, Cordelia Langford, John Sillitoe on behalf of the Wellcome Sanger Institute COVID-19 Surveillance Team                                    |

|                                                                                                                                                                          |                                                                                             |                                                                                                                                                             |                                                                                                                                                                                                                                                                                                                                                                                                                                                                                                                                                                                                                                                                                                                                                                                                                                                                                                                                                                                                                                                 |
|--------------------------------------------------------------------------------------------------------------------------------------------------------------------------|---------------------------------------------------------------------------------------------|-------------------------------------------------------------------------------------------------------------------------------------------------------------|-------------------------------------------------------------------------------------------------------------------------------------------------------------------------------------------------------------------------------------------------------------------------------------------------------------------------------------------------------------------------------------------------------------------------------------------------------------------------------------------------------------------------------------------------------------------------------------------------------------------------------------------------------------------------------------------------------------------------------------------------------------------------------------------------------------------------------------------------------------------------------------------------------------------------------------------------------------------------------------------------------------------------------------------------|
| EPI_ISL_1451560, EPI_ISL_1451672                                                                                                                                         | Lighthouse Lab in Alderley Park                                                             | Wellcome Sanger Institute for the COVID-19 Genomics UK (COG-UK) Consortium                                                                                  | Jacquelyn Wynn, Mairead Hyland, The Lighthouse Lab in Alderley Park and Alex Alderton, Roberto Amato, Jeffrey Barrett, Sonia Goncalves, Ewan Harrison, David K. Jackson, Ian Johnston, Dominic Kwiatkowski, Cordelia Langford, John Sillitoe on behalf of the Wellcome Sanger Institute COVID-19 Surveillance Team                                                                                                                                                                                                                                                                                                                                                                                                                                                                                                                                                                                                                                                                                                                              |
| EPI_ISL_1451704                                                                                                                                                          | Randox Laboratories                                                                         | Wellcome Sanger Institute for the COVID-19 Genomics UK (COG-UK) Consortium                                                                                  | Randox Laboratories and Alex Alderton, Roberto Amato, Jeffrey Barrett, Sonia Goncalves, Ewan Harrison, David K. Jackson, Ian Johnston, Dominic Kwiatkowski, Cordelia Langford, John Sillitoe on behalf of the Wellcome Sanger Institute COVID-19 Surveillance Team                                                                                                                                                                                                                                                                                                                                                                                                                                                                                                                                                                                                                                                                                                                                                                              |
| EPI_ISL_1455080                                                                                                                                                          | Lighthouse Lab in Alderley Park                                                             | Wellcome Sanger Institute for the COVID-19 Genomics UK (COG-UK) Consortium                                                                                  | Jacquelyn Wynn, Mairead Hyland, The Lighthouse Lab in Alderley Park and Alex Alderton, Roberto Amato, Jeffrey Barrett, Sonia Goncalves, Ewan Harrison, David K. Jackson, Ian Johnston, Dominic Kwiatkowski, Cordelia Langford, John Sillitoe on behalf of the Wellcome Sanger Institute COVID-19 Surveillance Team                                                                                                                                                                                                                                                                                                                                                                                                                                                                                                                                                                                                                                                                                                                              |
| EPI_ISL_1462605, EPI_ISL_1462797                                                                                                                                         | Laboratory Corporation of America                                                           | Centers for Disease Control and Prevention Division of Viral Diseases, Pathogen Discovery                                                                   | Dakota Howard, Dhvani Batra, Peter W. Cook, Kara Moser, Adrian Paskey, Jason Caravas, Benjamin Rambo-Martin, Shatavia Morrison, Christopher Gulvick, Scott Sammons, Yvette Unoarumhi, Darlene Wagner, Matthew Schramer, Minoo Agarwal, Eyad Almasri, Debbie Boles, Ayla Burns, Nuthawin Charoensri, Oren Cohen, Susan Countryman, Mary Ann Cristobal, Bobbi Croy, Suzanne Dale, Hrushikesh Deshmukh, Amanda Douglas, Vincent Drouillon, Marcia Eisenberg, Howard Engler, Rama Ghatti, Prashant Gupta, Susan Hicks, Jake Humphrey, Lax Iyer, Manoj Jain, Mohan Kolli, Brian Krueger, Tim Kuphal, Stanley Letovsky, Michael Levandoski, Craig Lukasik, Jonathan Meitzer, Brian Norvell, Mindy Nye, Scott Parker, Christos Petropoulos, John Pruitt, Steven Ragan, Scott Ryan, Mike Sapeta, Jana Schroth, Suresh Babu Selvaraju, Goran Stevovic, Amanda Suchanek, Andrea Throop, Lyndon Tilton, Thomas Urban, Joe Voshell, Kimberly Wagner, Jonathan Williams, Mary Williamson, Qian Zeng, Tricia Zwielfhofer, Clinton R. Paden, Duncan MacCannell |
| EPI_ISL_1466442                                                                                                                                                          | Lighthouse Lab in Alderley Park                                                             | Wellcome Sanger Institute for the COVID-19 Genomics UK (COG-UK) Consortium                                                                                  | Jacquelyn Wynn, Mairead Hyland, The Lighthouse Lab in Alderley Park and Alex Alderton, Roberto Amato, Jeffrey Barrett, Sonia Goncalves, Ewan Harrison, David K. Jackson, Ian Johnston, Dominic Kwiatkowski, Cordelia Langford, John Sillitoe on behalf of the Wellcome Sanger Institute COVID-19 Surveillance Team                                                                                                                                                                                                                                                                                                                                                                                                                                                                                                                                                                                                                                                                                                                              |
| EPI_ISL_1466505                                                                                                                                                          | Lighthouse Lab in Milton Keynes                                                             | Wellcome Sanger Institute for the COVID-19 Genomics UK (COG-UK) Consortium                                                                                  | The Lighthouse Lab in Milton Keynes and Alex Alderton, Roberto Amato, Jeffrey Barrett, Sonia Goncalves, Ewan Harrison, David K. Jackson, Ian Johnston, Dominic Kwiatkowski, Cordelia Langford, John Sillitoe on behalf of the Wellcome Sanger Institute COVID-19 Surveillance Team                                                                                                                                                                                                                                                                                                                                                                                                                                                                                                                                                                                                                                                                                                                                                              |
| EPI_ISL_1466537, EPI_ISL_1466586, EPI_ISL_1466965, EPI_ISL_1468036                                                                                                       | Lighthouse Lab in Alderley Park                                                             | Wellcome Sanger Institute for the COVID-19 Genomics UK (COG-UK) Consortium                                                                                  | Jacquelyn Wynn, Mairead Hyland, The Lighthouse Lab in Alderley Park and Alex Alderton, Roberto Amato, Jeffrey Barrett, Sonia Goncalves, Ewan Harrison, David K. Jackson, Ian Johnston, Dominic Kwiatkowski, Cordelia Langford, John Sillitoe on behalf of the Wellcome Sanger Institute COVID-19 Surveillance Team                                                                                                                                                                                                                                                                                                                                                                                                                                                                                                                                                                                                                                                                                                                              |
| EPI_ISL_1469975                                                                                                                                                          | Child Health Research Foundation                                                            | Child Health Research Foundation                                                                                                                            | CHRF Bangladesh Genomics Team                                                                                                                                                                                                                                                                                                                                                                                                                                                                                                                                                                                                                                                                                                                                                                                                                                                                                                                                                                                                                   |
| EPI_ISL_1470414                                                                                                                                                          | U.O. Microbiologia, Laboratorio Unico Centro Servizi - AUSL della Romagna                   | U.O. Microbiologia, Laboratorio Unico Centro Servizi - AUSL della Romagna                                                                                   | Giorgio Dirani, Silvia Zannoli, Vittorio Sambri                                                                                                                                                                                                                                                                                                                                                                                                                                                                                                                                                                                                                                                                                                                                                                                                                                                                                                                                                                                                 |
| EPI_ISL_1470761, EPI_ISL_1470912, EPI_ISL_1470977, EPI_ISL_1471033, EPI_ISL_1471106, EPI_ISL_1471292, EPI_ISL_1471853, EPI_ISL_1471881, EPI_ISL_1471891, EPI_ISL_1471940 | Pandemic Response Lab - NYC                                                                 | Pandemic Response Lab, R&D                                                                                                                                  | Henry Lee, Michael Hammerling, Melissa Hopkins, Cybill del Castillo, Shinyoung Clair Kang, William Ward, Pradeep Bugga, Sol Rey, Dylan Law, Haiping Hao, Jon Laurent                                                                                                                                                                                                                                                                                                                                                                                                                                                                                                                                                                                                                                                                                                                                                                                                                                                                            |
| EPI_ISL_1473564                                                                                                                                                          | Lighthouse Lab in Cambridge                                                                 | Wellcome Sanger Institute for the COVID-19 Genomics UK (COG-UK) Consortium                                                                                  | Rob Howes, The Lighthouse Lab in Cambridge and Alex Alderton, Roberto Amato, Jeffrey Barrett, Sonia Goncalves, Ewan Harrison, David K. Jackson, Ian Johnston, Dominic Kwiatkowski, Cordelia Langford, John Sillitoe on behalf of the Wellcome Sanger Institute COVID-19 Surveillance Team                                                                                                                                                                                                                                                                                                                                                                                                                                                                                                                                                                                                                                                                                                                                                       |
| EPI_ISL_1482926, EPI_ISL_1482961                                                                                                                                         | MUSC Molecular Pathology Laboratory                                                         | MUSC Molecular Pathology Laboratory                                                                                                                         | Julie W. Hirschhorn, W. Bailey Glen Jr, Dariusz Pytel, Jaclyn Dunne, Kristen Maurer, Frederick S. Nolte                                                                                                                                                                                                                                                                                                                                                                                                                                                                                                                                                                                                                                                                                                                                                                                                                                                                                                                                         |
| EPI_ISL_1483453                                                                                                                                                          | National Virus Reference Laboratory                                                         | National Virus Reference Laboratory                                                                                                                         | Guerrino Macori, Gabriel Gonzalez, Michael Carr, Zoe Yandle, Charlene Bennett, Jonathan Dean, Seamus Fanning, Cillian F De Gascun                                                                                                                                                                                                                                                                                                                                                                                                                                                                                                                                                                                                                                                                                                                                                                                                                                                                                                               |
| EPI_ISL_1483673                                                                                                                                                          | Alaska State Virology Laboratory                                                            | Alaska State Virology Laboratory                                                                                                                            | Stephanie DeRonde, Elva House, Lisa Smith, Ph.D., Jack Chen, Ph.D.                                                                                                                                                                                                                                                                                                                                                                                                                                                                                                                                                                                                                                                                                                                                                                                                                                                                                                                                                                              |
| EPI_ISL_1485365, EPI_ISL_1485773, EPI_ISL_1485776, EPI_ISL_1485823, EPI_ISL_1485840, EPI_ISL_1485993, EPI_ISL_1486041                                                    | Lighthouse Lab in Alderley Park                                                             | Wellcome Sanger Institute for the COVID-19 Genomics UK (COG-UK) Consortium                                                                                  | Jacquelyn Wynn, Mairead Hyland, The Lighthouse Lab in Alderley Park and Alex Alderton, Roberto Amato, Jeffrey Barrett, Sonia Goncalves, Ewan Harrison, David K. Jackson, Ian Johnston, Dominic Kwiatkowski, Cordelia Langford, John Sillitoe on behalf of the Wellcome Sanger Institute COVID-19 Surveillance Team                                                                                                                                                                                                                                                                                                                                                                                                                                                                                                                                                                                                                                                                                                                              |
| EPI_ISL_1487733, EPI_ISL_1487740                                                                                                                                         | Lighthouse Lab in Glasgow                                                                   | Wellcome Sanger Institute for the COVID-19 Genomics UK (COG-UK) Consortium                                                                                  | Harper VanSteenhouse, Yumi Kasai, David Gray, Carol Clugston, Anna Dominiczak and Alex Alderton, Roberto Amato, Jeffrey Barrett, Sonia Goncalves, Ewan Harrison, David K. Jackson, Ian Johnston, Dominic Kwiatkowski, Cordelia Langford, John Sillitoe on behalf of the Wellcome Sanger Institute COVID-19 Surveillance Team                                                                                                                                                                                                                                                                                                                                                                                                                                                                                                                                                                                                                                                                                                                    |
| EPI_ISL_1489520                                                                                                                                                          | Lighthouse Lab in Cambridge                                                                 | Wellcome Sanger Institute for the COVID-19 Genomics UK (COG-UK) Consortium                                                                                  | Rob Howes, The Lighthouse Lab in Cambridge and Alex Alderton, Roberto Amato, Jeffrey Barrett, Sonia Goncalves, Ewan Harrison, David K. Jackson, Ian Johnston, Dominic Kwiatkowski, Cordelia Langford, John Sillitoe on behalf of the Wellcome Sanger Institute COVID-19 Surveillance Team                                                                                                                                                                                                                                                                                                                                                                                                                                                                                                                                                                                                                                                                                                                                                       |
| EPI_ISL_1491525                                                                                                                                                          | National Virus Reference Laboratory                                                         | National Virus Reference Laboratory                                                                                                                         | Zoe Yandle, Charlene Bennett, Gabriel Gonzalez, Michael Carr, Jonathan Dean, Cillian F De Gascun                                                                                                                                                                                                                                                                                                                                                                                                                                                                                                                                                                                                                                                                                                                                                                                                                                                                                                                                                |
| EPI_ISL_1496213                                                                                                                                                          | Viollier AG                                                                                 | Department of Biosystems Science and Engineering, ETH Zürich                                                                                                | Chaoran Chen, Sarah Nadeau, Ivan Topolsky, Emmanouil Dermizakis, Keith Harshman, Ioannis Xenarios, Henri Pegeot, Lorenzo Cerutti, Deborah Penet, Philipp Jablonski, Lara Fuhrmann, David Dreifuss, Katharina Jahn, Christiane Beckmann, Maurice Redondo, Olivier Kobel, Christoph Noppen, Sophie Seidel, Noemie Santamaria de Souza, Niko Beerenwinkel, Tanja Stadler                                                                                                                                                                                                                                                                                                                                                                                                                                                                                                                                                                                                                                                                           |
| EPI_ISL_1497315, EPI_ISL_1497469, EPI_ISL_1497479                                                                                                                        | National Public Health Organization                                                         | National Public Health Organization                                                                                                                         | Kyriaki Tryfinopoulou et al                                                                                                                                                                                                                                                                                                                                                                                                                                                                                                                                                                                                                                                                                                                                                                                                                                                                                                                                                                                                                     |
| EPI_ISL_1497804                                                                                                                                                          | UW Virology Lab                                                                             | UW Virology Lab                                                                                                                                             | Pavitra Roychoudhury, Hong Xie, Lasata Shrestha, Shah Mohamed Bakhsh, Michelle Lin, Noah R. Baker, Sean Ellis, Saraswathi Sathees, Meei-Li Huang, Keith R Jerome, Alexander Greninger                                                                                                                                                                                                                                                                                                                                                                                                                                                                                                                                                                                                                                                                                                                                                                                                                                                           |
| EPI_ISL_1499330                                                                                                                                                          | 1. Główny Inspektorat Sanitarny, 2. Diagnostyka. Laboratoria Medyczne.                      | 1. ViroGenetics - BSL3 Laboratory of Virology, Maopolska Centre of Biotechnology, Jagiellonian University; 2. genXone SA, Research & Development Laboratory | Mazur-Panasiek,N., Grzegorz Nowicki, Gromowski.T., Natalia Drweska-Matelska, Jakub Grabowski, Anna Brylak, Aleksandra Gidlewicz, Karol Szeszko, Maciej Sykulski, ukasz Krych, Kowalski.M., Szulc.P., Sylwia Januszczak, Labaj.P.P., Micha Kaszuba, Pyrc.K.                                                                                                                                                                                                                                                                                                                                                                                                                                                                                                                                                                                                                                                                                                                                                                                      |
| EPI_ISL_1499587                                                                                                                                                          | unknown                                                                                     | Instituto Nacional de Saude (INSA)                                                                                                                          | Borges et al                                                                                                                                                                                                                                                                                                                                                                                                                                                                                                                                                                                                                                                                                                                                                                                                                                                                                                                                                                                                                                    |
| EPI_ISL_1500211                                                                                                                                                          | Illinois Department of Public Health - Springfield Lab                                      | Illinois Department of Public Health - Springfield Lab                                                                                                      | Bryan Sim, Gordon McCall                                                                                                                                                                                                                                                                                                                                                                                                                                                                                                                                                                                                                                                                                                                                                                                                                                                                                                                                                                                                                        |
| EPI_ISL_1500335                                                                                                                                                          | Maryland Genomics, Institute for Genome Sciences, University of Maryland School of Medicine | Maryland Genomics, Institute for Genome Sciences, University of Maryland School of Medicine                                                                 | Tallon, Luke J; Sadzewicz, Lisa D; Humphrys, Mike; Ott, Sandra; Roussey, Holly; Mehta, Aditya; Vavikolanu, Kranthi; Fraser, Claire M; Ravel, Jacques                                                                                                                                                                                                                                                                                                                                                                                                                                                                                                                                                                                                                                                                                                                                                                                                                                                                                            |
| EPI_ISL_1501487                                                                                                                                                          | Public Health Ontario Laboratory                                                            | Public Health Ontario Laboratory                                                                                                                            | Vanessa G Allen, Philip Banh, Yao Chen, Richard de Borja, Alireza Eshaghi, Nahuel Fittipaldi, Christine Frantz, Jonathan B Gubbay, Jennifer L Guthrie, Lawrence Heisler, Esha Joshi, Michael Laszloffy, Aimin Li, Michael CY Li, Dean Maxwell, Sandeep Nagra, Samir N Patel, Jared Simpson, Karthikeyan Sivaraman, Ashleigh Sullivan, Yogi Sundaravadanam, Sarah Teatero, Andre Villegas, Matthew Watson, Sandra Zittermann                                                                                                                                                                                                                                                                                                                                                                                                                                                                                                                                                                                                                     |
| EPI_ISL_1502086                                                                                                                                                          | DC Public Health Lab/ Dept. of Forensic Sciences                                            | DC Public Health Lab/ Dept. of Forensic Sciences                                                                                                            | Janis Doss, Scott Nguyen, Elizabeth Zelaya, Sarah Scott, Connie Maza, Monica Mann, Brittany Hamilton, David Payne, Jocelyn Hauser                                                                                                                                                                                                                                                                                                                                                                                                                                                                                                                                                                                                                                                                                                                                                                                                                                                                                                               |
| EPI_ISL_1504809                                                                                                                                                          | Lighthouse Lab in Cambridge                                                                 | Wellcome Sanger Institute for the COVID-19 Genomics UK (COG-UK) Consortium                                                                                  | Rob Howes, The Lighthouse Lab in Cambridge and Alex Alderton, Roberto Amato, Jeffrey Barrett, Sonia Goncalves, Ewan Harrison, David K. Jackson, Ian Johnston, Dominic Kwiatkowski, Cordelia Langford, John Sillitoe on behalf of the Wellcome Sanger Institute COVID-19 Surveillance Team                                                                                                                                                                                                                                                                                                                                                                                                                                                                                                                                                                                                                                                                                                                                                       |
| EPI_ISL_1505115                                                                                                                                                          | Lighthouse Lab in Glasgow                                                                   | Wellcome Sanger Institute for the COVID-19 Genomics UK (COG-UK) Consortium                                                                                  | Harper VanSteenhouse, Yumi Kasai, David Gray, Carol Clugston, Anna Dominiczak and Alex Alderton, Roberto Amato, Jeffrey Barrett, Sonia Goncalves, Ewan Harrison, David K. Jackson, Ian Johnston, Dominic Kwiatkowski, Cordelia Langford, John Sillitoe on behalf of the Wellcome Sanger Institute COVID-19 Surveillance Team                                                                                                                                                                                                                                                                                                                                                                                                                                                                                                                                                                                                                                                                                                                    |
| EPI_ISL_1506133                                                                                                                                                          | Lighthouse Lab in Cambridge                                                                 | Wellcome Sanger Institute for the COVID-19 Genomics UK (COG-UK) Consortium                                                                                  | Rob Howes, The Lighthouse Lab in Cambridge and Alex Alderton, Roberto Amato, Jeffrey Barrett, Sonia Goncalves, Ewan Harrison, David K. Jackson, Ian Johnston, Dominic Kwiatkowski, Cordelia Langford, John Sillitoe on behalf of the Wellcome Sanger Institute COVID-19 Surveillance Team                                                                                                                                                                                                                                                                                                                                                                                                                                                                                                                                                                                                                                                                                                                                                       |
| EPI_ISL_1508821                                                                                                                                                          | Laboratoire Biolim/FSS/UL                                                                   | Unité Mixte Internationale TransVIHMI (UMI 233 IRD - U1175                                                                                                  | Mounerou SALOU, Christelle BUTEL, Wembo A. HALATOKO, Amivi EHLAN, Abia A. KONOU, Issaka Maman, Syntyche DEVATCHAGNI, Adodo SADJI,                                                                                                                                                                                                                                                                                                                                                                                                                                                                                                                                                                                                                                                                                                                                                                                                                                                                                                               |

|                                                                                                                                                                                                                                                                                                                                                                                                       |                                                                            |                                                                                                                                                  |                                                                                                                                                                                                                                                                                                                                                                                                                                                                                                                                                                                                                                                                                                                                                                                                                                                                                                                                                                                                                                                   |
|-------------------------------------------------------------------------------------------------------------------------------------------------------------------------------------------------------------------------------------------------------------------------------------------------------------------------------------------------------------------------------------------------------|----------------------------------------------------------------------------|--------------------------------------------------------------------------------------------------------------------------------------------------|---------------------------------------------------------------------------------------------------------------------------------------------------------------------------------------------------------------------------------------------------------------------------------------------------------------------------------------------------------------------------------------------------------------------------------------------------------------------------------------------------------------------------------------------------------------------------------------------------------------------------------------------------------------------------------------------------------------------------------------------------------------------------------------------------------------------------------------------------------------------------------------------------------------------------------------------------------------------------------------------------------------------------------------------------|
|                                                                                                                                                                                                                                                                                                                                                                                                       |                                                                            | INSERM - Université de Montpellier IRD (Institut de recherche pour le développement)                                                             | Kokou TEGUENI, Kokou AGBODEKA, Sidonie A.M.KAGNISSODE, Akoélé SILIADIN, Alassane OURO-MEDELI, Messanh DOUFFAN, Déléma MABA, Sika DOSSIM, Améyo DORKENOO, Mireille PRINCE-DAVID, Anoumou DAGNRA, Laetitia SERRANO, Ahidjo AYOUNBA, Eric DELAPORTE, Martine PEETERS                                                                                                                                                                                                                                                                                                                                                                                                                                                                                                                                                                                                                                                                                                                                                                                 |
| EPI_ISL_1508947                                                                                                                                                                                                                                                                                                                                                                                       | Laboratoire Biolim/FSS/UL                                                  | Unité Mixte Internationale TransVIHMI (UMI 233 IRD - U1175 INSERM - Université de Montpellier IRD (Institut de recherche pour le développement)) | Mounerou SALOU, Christelle BUTEL, Wembo A. HALATOKO, Amivi EHLAN, Abia A. KONOU, Issaka Maman, Syntyche DEVATCHAGNI, Adodo SADJI, Kokou TEGUENI, Kokou AGBODEKA, Sidonie A.M.KAGNISSODE, Akoélé SILIADIN, Alassane OURO-MEDELI, Messanh DOUFFAN, Déléma MABA, Sika DOSSIM, Améyo DORKENOO, Mireille PRINCE-DAVID, Anoumou DAGNRA, Laetitia SERRANO, Ahidjo AYOUNBA, Eric DELAPORTE, Martine PEETERS                                                                                                                                                                                                                                                                                                                                                                                                                                                                                                                                                                                                                                               |
| EPI_ISL_1508961                                                                                                                                                                                                                                                                                                                                                                                       | Laboratoire Biolim/FSS/UL                                                  | Unité Mixte Internationale TransVIHMI (UMI 233 IRD - U1175 INSERM - Université de Montpellier IRD (Institut de recherche pour le développement)) | Mounerou SALOU, Christelle BUTEL, Wembo A. HALATOKO, Amivi EHLAN, Abia A. KONOU, Issaka Maman, Syntyche DEVATCHAGNI, Adodo SADJI, Kokou TEGUENI, Kokou AGBODEKA, Sidonie A.M.KAGNISSODE, Akoélé SILIADIN, Alassane OURO-MEDELI, Messanh DOUFFAN, Déléma MABA, Sika DOSSIM, Améyo DORKENOO, Mireille PRINCE-DAVID, Anoumou DAGNRA, Laetitia SERRANO, Ahidjo AYOUNBA, Eric DELAPORTE, Martine PEETERS                                                                                                                                                                                                                                                                                                                                                                                                                                                                                                                                                                                                                                               |
| EPI_ISL_1510763, EPI_ISL_1510921, EPI_ISL_1510922, EPI_ISL_1510923                                                                                                                                                                                                                                                                                                                                    | National Virus Reference Laboratory                                        | National Virus Reference Laboratory                                                                                                              | Zoe Yandle, Charlene Bennett, Gabriel Gonzalez, Michael Carr, Jonathan Dean, Cillian F De Gascun                                                                                                                                                                                                                                                                                                                                                                                                                                                                                                                                                                                                                                                                                                                                                                                                                                                                                                                                                  |
| EPI_ISL_1511121                                                                                                                                                                                                                                                                                                                                                                                       | National Virus Reference Laboratory                                        | National Virus Reference Laboratory                                                                                                              | Fiona Crispie, Calum Walsh, Matthew McCabe, Zoe Yandle, Charlene Bennet, Gabriel Gonzalez, Michael Carr, Jonathan Dean, Paul Cotter, Cillian F De Gascun                                                                                                                                                                                                                                                                                                                                                                                                                                                                                                                                                                                                                                                                                                                                                                                                                                                                                          |
| EPI_ISL_1511341                                                                                                                                                                                                                                                                                                                                                                                       | National Virus Reference Laboratory                                        | National Virus Reference Laboratory                                                                                                              | Zoe Yandle, Charlene Bennet, Gabriel Gonzalez, Michael Carr, Jonathan Dean, Cillian F De Gascun                                                                                                                                                                                                                                                                                                                                                                                                                                                                                                                                                                                                                                                                                                                                                                                                                                                                                                                                                   |
| EPI_ISL_1514210                                                                                                                                                                                                                                                                                                                                                                                       | Laboratory Corporation of America                                          | Centers for Disease Control and Prevention Division of Viral Diseases, Pathogen Discovery                                                        | Dakota Howard, Dhvani Batra, Peter W. Cook, Kara Moser, Adrian Paskey, Jason Caravas, Benjamin Rambo-Martin, Shatavia Morrison, Christopher Gulvick, Scott Sammons, Yvette Unoarumhi, Darlene Wagner, Matthew Schmeier, Minoou Agarwal, Eyad Almasri, Debbie Boles, Ayla Burns, Nuthawin Charoensri, Oren Cohen, Susan Countryman, Mary Ann Cristobal, Bobbi Croy, Suzanne Dale, Hrushikesh Deshmukh, Amanda Douglas, Vincent Drouillon, Marcia Eisenberg, Howard Engler, Rama Ghatti, Prashant Gupta, Susan Hicks, Jake Humphrey, Lax Iyer, Manoj Jain, Mohan Kolli, Brian Krueger, Tim Kuphal, Stanley Letovsky, Michael Levandoski, Craig Lukasik, Jonathan Meltzer, Brian Norvell, Mindy Nye, Scott Parker, Christos Petropoulos, John Pruitt, Steven Ragan, Scott Ryan, Mike Sapeta, Jana Schroth, Suresh Babu Selvaraju, Goran Stevovic, Amanda Suchanek, Andrea Throop, Lyndon Tilson, Thomas Urban, Joe Vosshell, Kimberly Wagner, Jonathan Williams, Mary Williamson, Qian Zeng, Tricia Zwielfhofer, Clinton R. Paden, Duncan MacCannell |
| EPI_ISL_1517560, EPI_ISL_1518743, EPI_ISL_1519315                                                                                                                                                                                                                                                                                                                                                     | Lighthouse Lab in Alderley Park                                            | Wellcome Sanger Institute for the COVID-19 Genomics UK (COG-UK) Consortium                                                                       | Jacquelyn Wynn, Mairead Hyland, The Lighthouse Lab in Alderley Park and Alex Alderton, Roberto Amato, Jeffrey Barrett, Sonia Goncalves, Ewan Harrison, David K. Jackson, Ian Johnston, Dominic Kwiatkowski, Cordelia Langford, John Sillitoe on behalf of the Wellcome Sanger Institute COVID-19 Surveillance Team                                                                                                                                                                                                                                                                                                                                                                                                                                                                                                                                                                                                                                                                                                                                |
| EPI_ISL_1522593, EPI_ISL_1522609, EPI_ISL_1523113                                                                                                                                                                                                                                                                                                                                                     | Laboratoires d'analyses medicales - Ketterhill                             | Laboratoire national de sante, Microbiology, Microbial Genomics Platform                                                                         | Anke Wienecke-Baldacchino, Catherine Ragimbeau, Jessica Tapp, Fatu Djabi, Lise Pignon, Raoul Salmon, Serge Vedy, Caroline Scheiber, Tamir Abdelrahman                                                                                                                                                                                                                                                                                                                                                                                                                                                                                                                                                                                                                                                                                                                                                                                                                                                                                             |
| EPI_ISL_1523114                                                                                                                                                                                                                                                                                                                                                                                       | Laboratoire national de sante, Microbiology, Virology                      | Laboratoire national de sante, Microbiology, Microbial Genomics Platform                                                                         | Anke Wienecke-Baldacchino, Catherine Ragimbeau, Jessica Tapp, Fatu Djabi, Lise Pignon, Raoul Salmon, Trung Nguyen Nguyen, Tamir Abdelrahman                                                                                                                                                                                                                                                                                                                                                                                                                                                                                                                                                                                                                                                                                                                                                                                                                                                                                                       |
| EPI_ISL_1523870, EPI_ISL_1523904                                                                                                                                                                                                                                                                                                                                                                      | UW Virology Lab                                                            | UW Virology Lab                                                                                                                                  | Pavitra Roychoudhury, Hong Xie, Lasata Shrestha, Shah Mohamed Bakhsh, Michelle Lin, Noah R. Baker, Sean Ellis, Saraswathi Sathees, Meei-Li Huang, Keith R Jerome, Alexander Greninger                                                                                                                                                                                                                                                                                                                                                                                                                                                                                                                                                                                                                                                                                                                                                                                                                                                             |
| EPI_ISL_1524700, EPI_ISL_1524703                                                                                                                                                                                                                                                                                                                                                                      | Laboratoire Biolim/FSS/UL                                                  | Unité Mixte Internationale TransVIHMI (UMI 233 IRD - U1175 INSERM - Université de Montpellier IRD (Institut de recherche pour le développement)) | Mounerou SALOU, Christelle BUTEL, Wembo A. HALATOKO, Amivi EHLAN, Abia A. KONOU, Issaka Maman, Syntyche DEVATCHAGNI, Adodo SADJI, Kokou TEGUENI, Kokou AGBODEKA, Sidonie A.M.KAGNISSODE, Akoélé SILIADIN, Alassane OURO-MEDELI, Messanh DOUFFAN, Déléma MABA, Sika DOSSIM, Améyo DORKENOO, Mireille PRINCE-DAVID, Anoumou DAGNRA, Laetitia SERRANO, Ahidjo AYOUNBA, Eric DELAPORTE, Martine PEETERS                                                                                                                                                                                                                                                                                                                                                                                                                                                                                                                                                                                                                                               |
| EPI_ISL_1524735                                                                                                                                                                                                                                                                                                                                                                                       | Ospedale San Giovanni Evangelista                                          | INMI Lazzaro Spallanzani IRCCS                                                                                                                   | G Bonfiglio, O Butera, CEM Gruber, F Santini, B Bartolini, E Giombini, F Messina, M Rueca, D Di Fusco, D Cerini, A Di Caro, MR Capobianchi                                                                                                                                                                                                                                                                                                                                                                                                                                                                                                                                                                                                                                                                                                                                                                                                                                                                                                        |
| EPI_ISL_1526434                                                                                                                                                                                                                                                                                                                                                                                       | CNR Virus des Infections Respiratoires - France SUD                        | CNR Virus des Infections Respiratoires - France SUD                                                                                              | Antonin Bal, Gregory Destras, Gwendolynne Burfin, Hadrien Regue, Quentin Semanas, Martine Valette, Bruno Lina, Laurence Josset                                                                                                                                                                                                                                                                                                                                                                                                                                                                                                                                                                                                                                                                                                                                                                                                                                                                                                                    |
| EPI_ISL_1527538                                                                                                                                                                                                                                                                                                                                                                                       | TXDSHS                                                                     | TXDSHS                                                                                                                                           | Rashmi Tuladhar, Bonnie Oh, Jenny Zhang, Maliha Rahman, Mayela Pedrueza, Anita Pokharel, Lorraine Rodriguez, Myong Koag, Chun Wang, Rachel Lee, Grace Kubin                                                                                                                                                                                                                                                                                                                                                                                                                                                                                                                                                                                                                                                                                                                                                                                                                                                                                       |
| EPI_ISL_1528214                                                                                                                                                                                                                                                                                                                                                                                       | Hospital                                                                   | National Reference Center for Viruses of Respiratory Infections, Institut Pasteur, Paris                                                         | Marion Barbet, Sylvie Behillil, Frédéric Lemoine, Corinne Maufrais, Christophe Malabat, Amaury Vaysse, Méline Bizard, Angela Brisebarre, Camille Capel, Louise Lefrançois, Etienne Simon-Lorière, Vincent Enouf, Maud Vanpeene, Sylvie van der Werf, Alexandra Ducancelle                                                                                                                                                                                                                                                                                                                                                                                                                                                                                                                                                                                                                                                                                                                                                                         |
| EPI_ISL_1528895                                                                                                                                                                                                                                                                                                                                                                                       | 4937 MacCorkle Ave SE, Charleston, WV 25304                                | WVU and Marshall University Combined Genomics Core Facilities                                                                                    | "James Denvir, Peter Stoilov, Peter Perrotta, Wesley Kimble, Ryan Percifield"                                                                                                                                                                                                                                                                                                                                                                                                                                                                                                                                                                                                                                                                                                                                                                                                                                                                                                                                                                     |
| EPI_ISL_1532081                                                                                                                                                                                                                                                                                                                                                                                       | Idaho Bureau of Laboratories                                               | Idaho Bureau of Laboratories                                                                                                                     | R. Beukelman, Matthew Charles Burns, Aimee Ceniseros, Robert L. Voermans, Christopher Ball                                                                                                                                                                                                                                                                                                                                                                                                                                                                                                                                                                                                                                                                                                                                                                                                                                                                                                                                                        |
| EPI_ISL_1533426                                                                                                                                                                                                                                                                                                                                                                                       | National Institute of Laboratory Medicine and Referral Center              | Genomic Research Lab, BCSIR                                                                                                                      | Md. Murshed Hasan Sarkar, Shahina Akter, Abu Sayeed Mohammad Mahmud, Mohammad Samir Uzzaman, Eshrar Osman, Md. Ahasan Habib, Tanjina Akhter Banu, Barna Goswami, Iffat Jahan, Md. Saddam Hossain, Mohammad Mohi Uddin, Tasnim Nafisa, Md. Maruf Ahmed Molla, Mahmuda Yeasmin, Asish Kumar Ghosh, Arifa Akram, A. K. M. Shamsuzzaman, Md. Salim Khan                                                                                                                                                                                                                                                                                                                                                                                                                                                                                                                                                                                                                                                                                               |
| EPI_ISL_1536309, EPI_ISL_1536960                                                                                                                                                                                                                                                                                                                                                                      | Lighthouse Lab in Alderley Park                                            | Wellcome Sanger Institute for the COVID-19 Genomics UK (COG-UK) Consortium                                                                       | Jacquelyn Wynn, Mairead Hyland, The Lighthouse Lab in Alderley Park and Alex Alderton, Roberto Amato, Jeffrey Barrett, Sonia Goncalves, Ewan Harrison, David K. Jackson, Ian Johnston, Dominic Kwiatkowski, Cordelia Langford, John Sillitoe on behalf of the Wellcome Sanger Institute COVID-19 Surveillance Team                                                                                                                                                                                                                                                                                                                                                                                                                                                                                                                                                                                                                                                                                                                                |
| EPI_ISL_1538403                                                                                                                                                                                                                                                                                                                                                                                       | Lighthouse Lab in Glasgow                                                  | Wellcome Sanger Institute for the COVID-19 Genomics UK (COG-UK) Consortium                                                                       | Harper VanSteenhouse, Yumi Kasai, David Gray, Carol Clugston, Anna Dominiczak and Alex Alderton, Roberto Amato, Jeffrey Barrett, Sonia Goncalves, Ewan Harrison, David K. Jackson, Ian Johnston, Dominic Kwiatkowski, Cordelia Langford, John Sillitoe on behalf of the Wellcome Sanger Institute COVID-19 Surveillance Team                                                                                                                                                                                                                                                                                                                                                                                                                                                                                                                                                                                                                                                                                                                      |
| EPI_ISL_1538405                                                                                                                                                                                                                                                                                                                                                                                       | National Institute of Laboratory Medicine and Referral Center              | Dr. Qudrat-I-Khuda Road, Dhaka-1205, Bangladesh                                                                                                  | Tanjina Akhter Banu, Md. Murshed Hasan Sarkar, Abu Sayeed Mohammad Mahmud, Mohammad Samir Uzzaman, Eshrar Osman, Md. Ahasan Habib, Shahina Akter, Barna Goswami, Iffat Jahan, Md. Saddam Hossain, Mohammad Mohi Uddin, Tasnim Nafisa, Md. Maruf Ahmed Molla, Mahmuda Yeasmin, Asish Kumar Ghosh, Arifa Akram, A. K. M. Shamsuzzaman, Md. Salim Khan                                                                                                                                                                                                                                                                                                                                                                                                                                                                                                                                                                                                                                                                                               |
| EPI_ISL_1541941                                                                                                                                                                                                                                                                                                                                                                                       | OHSU Lab Services Molecular Microbiology Lab                               | Oregon SARS-CoV-2 Genome Sequencing Center                                                                                                       | Brendan L. O'Connell, Sally Grindstaff, Kayla Carter, Sonia Acharya, Ruth V. Nichols, Alec J. Hirsch, Donna Hansel, Guang Fan, Xuan Qin, Daniel N. Strelbow, William B. Messer, Andrew C. Adey, Benjamin N. Bimber, Brian J. O'Roak                                                                                                                                                                                                                                                                                                                                                                                                                                                                                                                                                                                                                                                                                                                                                                                                               |
| EPI_ISL_1542102, EPI_ISL_1542316, EPI_ISL_1542356, EPI_ISL_1542581, EPI_ISL_1542620, EPI_ISL_1542661, EPI_ISL_1542737, EPI_ISL_1542761, EPI_ISL_1542809, EPI_ISL_1543164, EPI_ISL_1543238, EPI_ISL_1543248, EPI_ISL_1543354, EPI_ISL_1543412, EPI_ISL_1543528, EPI_ISL_1543561, EPI_ISL_1543569, EPI_ISL_1543715, EPI_ISL_1543758, EPI_ISL_1543770, EPI_ISL_1543821, EPI_ISL_1543887, EPI_ISL_1543899 |                                                                            |                                                                                                                                                  |                                                                                                                                                                                                                                                                                                                                                                                                                                                                                                                                                                                                                                                                                                                                                                                                                                                                                                                                                                                                                                                   |
| see above                                                                                                                                                                                                                                                                                                                                                                                             | Pandemic Response Lab - NYC                                                | Pandemic Response Lab, R&D                                                                                                                       | Henry Lee, Michael Hammerling, Melissa Hopkins, Cybil del Castillo, Shinyoung Clair Kang, William Ward, Pradeep Bugga, Sol Rey, Dylan Law, Katharine Nelson, Haiping Hao, Jon Laurent                                                                                                                                                                                                                                                                                                                                                                                                                                                                                                                                                                                                                                                                                                                                                                                                                                                             |
| EPI_ISL_1543976                                                                                                                                                                                                                                                                                                                                                                                       | National Public Health Laboratory, National Centre for Infectious Diseases | National Public Health Laboratory, National Centre for Infectious Diseases                                                                       | Tze Minn Mak, Zhenyang Zhou, Grace Jie Yin Ngan, Royce Ang, Lin Cui, Raymond Tzer Pin Lin                                                                                                                                                                                                                                                                                                                                                                                                                                                                                                                                                                                                                                                                                                                                                                                                                                                                                                                                                         |
| EPI_ISL_1551368                                                                                                                                                                                                                                                                                                                                                                                       | DC Public Health Lab/ Dept. of Forensic Sciences                           | DC Public Health Lab/ Dept. of Forensic Sciences                                                                                                 | Janis Doss, Scott Nguyen, Elizabeth Zelaya, Sarah Scott, Connie Maza, Monica Mann, Brittany Hamilton, David Payne, Jocelyn Hauser                                                                                                                                                                                                                                                                                                                                                                                                                                                                                                                                                                                                                                                                                                                                                                                                                                                                                                                 |
| EPI_ISL_1552316                                                                                                                                                                                                                                                                                                                                                                                       | National Virus Reference Laboratory                                        | National Virus Reference Laboratory                                                                                                              | Guerrino Macorì, Gabriel Gonzalez, Michael Carr, Zoe Yandle, Charlene Bennett, Jonathan Dean, Seamus Fanning, Cillian F De Gascun                                                                                                                                                                                                                                                                                                                                                                                                                                                                                                                                                                                                                                                                                                                                                                                                                                                                                                                 |
| EPI_ISL_1552383, EPI_ISL_1552391, EPI_ISL_1552470, EPI_ISL_1552475, EPI_ISL_1552492, EPI_ISL_1552518, EPI_ISL_1552540, EPI_ISL_1552573, EPI_ISL_1552667                                                                                                                                                                                                                                               | National Virus Reference Laboratory                                        | National Virus Reference Laboratory                                                                                                              | Zoe Yandle, Charlene Bennett, Gabriel Gonzalez, Michael Carr, Jonathan Dean, Cillian F De Gascun                                                                                                                                                                                                                                                                                                                                                                                                                                                                                                                                                                                                                                                                                                                                                                                                                                                                                                                                                  |
| EPI_ISL_1553194                                                                                                                                                                                                                                                                                                                                                                                       | Illinois Department of Public Health - Springfield Lab                     | Illinois Department of Public Health - Springfield Lab                                                                                           | Bryan Sim, Gordon McCall                                                                                                                                                                                                                                                                                                                                                                                                                                                                                                                                                                                                                                                                                                                                                                                                                                                                                                                                                                                                                          |
| EPI_ISL_1557245                                                                                                                                                                                                                                                                                                                                                                                       | Marche en Famenne                                                          | Plateforme de testing Namuroise                                                                                                                  | Céline Maschietto; Otto Gaetan ; Denis Olivier ; Degosserie Jonathan ; Mullier François                                                                                                                                                                                                                                                                                                                                                                                                                                                                                                                                                                                                                                                                                                                                                                                                                                                                                                                                                           |
| EPI_ISL_1558616                                                                                                                                                                                                                                                                                                                                                                                       | Platform BIS UZA/UAntwerpen                                                | UAntwerp, Laboratory of Medical Microbiology                                                                                                     | Basil Britto Xavier, Jasmine Coppens, Marie Le Mercier, Christine Lammens, Veerle Matheussen, Herman Goossens                                                                                                                                                                                                                                                                                                                                                                                                                                                                                                                                                                                                                                                                                                                                                                                                                                                                                                                                     |
| EPI_ISL_1559481, EPI_ISL_1559488,                                                                                                                                                                                                                                                                                                                                                                     | Quest Diagnostics Incorporated                                             | Centers for Disease Control and Prevention Division of Viral                                                                                     | Dakota Howard, Dhvani Batra, Peter W. Cook, Kara Moser, Adrian Paskey, Jason Caravas, Benjamin Rambo-Martin, Shatavia Morrison, Christopher                                                                                                                                                                                                                                                                                                                                                                                                                                                                                                                                                                                                                                                                                                                                                                                                                                                                                                       |

|                                                                                                                       |                                                                                                                |                                                                                                                                                  |                                                                                                                                                                                                                                                                                                                                                                                                                                                                                                                                                                                                                                                                                                                        |
|-----------------------------------------------------------------------------------------------------------------------|----------------------------------------------------------------------------------------------------------------|--------------------------------------------------------------------------------------------------------------------------------------------------|------------------------------------------------------------------------------------------------------------------------------------------------------------------------------------------------------------------------------------------------------------------------------------------------------------------------------------------------------------------------------------------------------------------------------------------------------------------------------------------------------------------------------------------------------------------------------------------------------------------------------------------------------------------------------------------------------------------------|
| EPI_ISL_1559545                                                                                                       |                                                                                                                | Diseases, Pathogen Discovery                                                                                                                     | Gulvick, Scott Sammons, Yvette Unoarumhi, Darlene Wagner, Matthew Schmerer, S. H. Rosenthal, A. Gerasimova, R. M. Kagan, B. Anderson, M. Hua, Y. Liu, L.E. Bernstein, K.E. Livingston, A. Perez, I. A. Shlyakhter, R. V. Rolando, R. Owen, P. Tanpaiboon, F. Lacbawan, Clinton R. Paden, Duncan MacCannell                                                                                                                                                                                                                                                                                                                                                                                                             |
| EPI_ISL_1561398, EPI_ISL_1561906, EPI_ISL_1562310, EPI_ISL_1562319, EPI_ISL_1562619, EPI_ISL_1563132, EPI_ISL_1563340 | Aegis Sciences Corporation                                                                                     | Centers for Disease Control and Prevention Division of Viral Diseases, Pathogen Discovery                                                        | Dakota Howard, Dhvani Batra, Peter W. Cook, Kara Moser, Adrian Paskey, Jason Caravas, Benjamin Rambo-Martin, Shatavia Morrison, Christopher Gulvick, Scott Sammons, Yvette Unoarumhi, Darlene Wagner, Matthew Schmerer, Cyndi Clark, Patrick Campbell, Rob Case, Vikramsinha Ghorpade, Holly Houdeshell, Ola Kvalvaag, Dillon Nall, Ethan Sanders, Alec Vest, Shaun Westlund, Matthew Hardison, Clinton R. Paden, Duncan MacCannell                                                                                                                                                                                                                                                                                    |
| EPI_ISL_1564270                                                                                                       | Lighthouse Lab in Cambridge                                                                                    | Wellcome Sanger Institute for the COVID-19 Genomics UK (COG-UK) Consortium                                                                       | Rob Howes, The Lighthouse Lab in Cambridge and Alex Alderton, Roberto Amato, Jeffrey Barrett, Sonia Goncalves, Ewan Harrison, David K. Jackson, Ian Johnston, Dominic Kwiatkowski, Cordelia Langford, John Sillitoe on behalf of the Wellcome Sanger Institute COVID-19 Surveillance Team                                                                                                                                                                                                                                                                                                                                                                                                                              |
| EPI_ISL_1567168                                                                                                       | Limbach - MVZ Humangenetik Ulm                                                                                 | Robert Koch Institute                                                                                                                            | unknown                                                                                                                                                                                                                                                                                                                                                                                                                                                                                                                                                                                                                                                                                                                |
| EPI_ISL_1575993, EPI_ISL_1576021, EPI_ISL_1576023                                                                     | Laboratorio di Microbiologia                                                                                   | Laboratorio di Microbiologia                                                                                                                     | Martinetti Lucchini Gladys, Valeria Spina                                                                                                                                                                                                                                                                                                                                                                                                                                                                                                                                                                                                                                                                              |
| EPI_ISL_1576046, EPI_ISL_1576713                                                                                      | Helix/Illumina                                                                                                 | Centers for Disease Control and Prevention Division of Viral Diseases, Pathogen Discovery                                                        | Dakota Howard, Dhvani Batra, Peter W. Cook, Kara Moser, Adrian Paskey, Jason Caravas, Benjamin Rambo-Martin, Shatavia Morrison, Christopher Gulvick, Scott Sammons, Yvette Unoarumhi, Darlene Wagner, Matthew Schmerer, Eileen de Feo, Jan Antico, Christine Tran, Matthew Tolentino, Shannon Wickline, Kim Gietzen, Brad Sickler, Jingtao Liu, Eric Allen, Phil Febbo, Nicole L. Washington, Simon White, Geraint Levan, Kelly Schiabor Barrett, Elizabeth Cirulli, Alexandre Bolze, Ary Ascencio, Charlotte Rivera-Garcia, Ryan Cho, Jason Nguyen, Sherry Wang, Jimmy Ramirez, Tyler Cassens, Eren Sandoval, Magnus Isaksson, William Lee, David Becker, Marc Laurent, James Lu, Clinton R. Paden, Duncan MacCannell |
| EPI_ISL_1577403, EPI_ISL_1577408                                                                                      | National Virus Reference Laboratory                                                                            | National Virus Reference Laboratory                                                                                                              | Zoe Yandle, Charlene Bennett, Gabriel Gonzalez, Michael Carr, Jonathan Dean, Cillian F De Gascun                                                                                                                                                                                                                                                                                                                                                                                                                                                                                                                                                                                                                       |
| EPI_ISL_1577848                                                                                                       | Virology, Universitätsklinikum des Saarlandes                                                                  | Epigenetics, Saarland University                                                                                                                 | Kathrin Kattler, Stefan Lohse, Sascha Tierling, Thorsten Pfuhl, Sigrun Smola, Jörn Walter                                                                                                                                                                                                                                                                                                                                                                                                                                                                                                                                                                                                                              |
| EPI_ISL_1578454                                                                                                       | Laboratory of Clinical Microbiology, Virology and Bioemergencies, ASST Fatebenefratelli Sacco - Sacco Hospital | Laboratory of Clinical Microbiology, Virology and Bioemergencies, ASST Fatebenefratelli Sacco - Sacco Hospital                                   | Valeria Micheli, Alessandro Mancon, Alberto Rizzo, Fiorenza Bracchitta, Luca Rizzuto, Maria Rita Gismondo                                                                                                                                                                                                                                                                                                                                                                                                                                                                                                                                                                                                              |
| EPI_ISL_1580744, EPI_ISL_1580895, EPI_ISL_1581714                                                                     | Helix/Illumina                                                                                                 | Centers for Disease Control and Prevention Division of Viral Diseases, Pathogen Discovery                                                        | Dakota Howard, Dhvani Batra, Peter W. Cook, Kara Moser, Adrian Paskey, Jason Caravas, Benjamin Rambo-Martin, Shatavia Morrison, Christopher Gulvick, Scott Sammons, Yvette Unoarumhi, Darlene Wagner, Matthew Schmerer, Eileen de Feo, Jan Antico, Christine Tran, Matthew Tolentino, Shannon Wickline, Kim Gietzen, Brad Sickler, Jingtao Liu, Eric Allen, Phil Febbo, Nicole L. Washington, Simon White, Geraint Levan, Kelly Schiabor Barrett, Elizabeth Cirulli, Alexandre Bolze, Ary Ascencio, Charlotte Rivera-Garcia, Ryan Cho, Jason Nguyen, Sherry Wang, Jimmy Ramirez, Tyler Cassens, Eren Sandoval, Magnus Isaksson, William Lee, David Becker, Marc Laurent, James Lu, Clinton R. Paden, Duncan MacCannell |
| EPI_ISL_1582123                                                                                                       | Quest Diagnostics Incorporated                                                                                 | Centers for Disease Control and Prevention Division of Viral Diseases, Pathogen Discovery                                                        | Dakota Howard, Dhvani Batra, Peter W. Cook, Kara Moser, Adrian Paskey, Jason Caravas, Benjamin Rambo-Martin, Shatavia Morrison, Christopher Gulvick, Scott Sammons, Yvette Unoarumhi, Darlene Wagner, Matthew Schmerer, S. H. Rosenthal, A. Gerasimova, R. M. Kagan, B. Anderson, M. Hua, Y. Liu, L.E. Bernstein, K.E. Livingston, A. Perez, I. A. Shlyakhter, R. V. Rolando, R. Owen, P. Tanpaiboon, F. Lacbawan, Clinton R. Paden, Duncan MacCannell                                                                                                                                                                                                                                                                 |
| EPI_ISL_1582441                                                                                                       | Curative                                                                                                       | New Mexico Department of Health Scientific Laboratory                                                                                            | Elie Johnson, Anastacia Griego-Fisher, D'eldra Malone, Jennifer Benoit                                                                                                                                                                                                                                                                                                                                                                                                                                                                                                                                                                                                                                                 |
| EPI_ISL_1584274, EPI_ISL_1584322                                                                                      | Lighthouse Lab in Milton Keynes                                                                                | Wellcome Sanger Institute for the COVID-19 Genomics UK (COG-UK) Consortium                                                                       | The Lighthouse Lab in Milton Keynes and Alex Alderton, Roberto Amato, Jeffrey Barrett, Sonia Goncalves, Ewan Harrison, David K. Jackson, Ian Johnston, Dominic Kwiatkowski, Cordelia Langford, John Sillitoe on behalf of the Wellcome Sanger Institute COVID-19 Surveillance Team                                                                                                                                                                                                                                                                                                                                                                                                                                     |
| EPI_ISL_1585153                                                                                                       | Texas Department of State Health Services (TXDSHS)                                                             | Texas Department of State Health Services (TXDSHS)                                                                                               | Rashmi Tuladhar, Bonnie Oh, Jenny Zhang, Maliha Rahman, Mayela Pedruza, Anita Pokharel, Lorraine Rodriguez, Myong Koag, Chun Wang, Rachel Lee, Grace Kubin                                                                                                                                                                                                                                                                                                                                                                                                                                                                                                                                                             |
| EPI_ISL_1585273                                                                                                       | Armed Forces Institute of Pathology (AFIP), Dhaka Cantonment                                                   | Genomic Research Lab, BCSIR                                                                                                                      | Md. Murshed Hasan Sarkar, Abu Sayeed Mohammad Mahmud, Mohammad Samir Uzzaman, Eshrar Osman, Md. Ahasan Habib, Shahina Akter, Tanjina Akhter Banu, Barna Goswami, Iffat Jahan, Md. Saddam Hossain, Mohammad Mohi Uddin, Md. Kamrul Islam, Mohammad Mizanur Rahman, Susane Giti, Md. Salim Khan                                                                                                                                                                                                                                                                                                                                                                                                                          |
| EPI_ISL_1585361                                                                                                       | Laboratorio di Microbiologia                                                                                   | Laboratorio di Microbiologia                                                                                                                     | Martinetti Lucchini Gladys, Valeria Spina                                                                                                                                                                                                                                                                                                                                                                                                                                                                                                                                                                                                                                                                              |
| EPI_ISL_1586954                                                                                                       | Laboratoire Biolim/FSS/UL                                                                                      | Unité Mixte Internationale TransVIHMI (UMI 233 IRD - U1175 INSERM - Université de Montpellier) IRD (Institut de recherche pour le développement) | Mounerou SALOU, Christelle BUTEL, Wembo A. HALATOKO, Amivi EHLAN, Abia A. KONOU, Issaka Maman, Syntyche DEVATCHAGNI, Adodo SADJI, Kokou TEGUENI, Koku AGBODEKA, Sidonie A.M.KAGNISSODE, Akoélé SILIADIN, Alassane OURO-MEDELI, Messanh DOUFFAN, Déléma MABA, Sika DOSSIM, Améyo DORKENOO, Mireille PRINCE-DAVID, Anoumou DAGNRA, Laetitia SERRANO, Ahidjo AYOUBA, Eric DELAPORTE, Martine PEETERS                                                                                                                                                                                                                                                                                                                      |
| EPI_ISL_1587121                                                                                                       | Seattle Flu Study                                                                                              | Seattle Flu Study                                                                                                                                | Deborah A. Nickerson, Chris D. Frazer, Jover Lee, Benjamin Pelle, Erica Ryke, Matthew Richardson, Amanda Adler, Elisabeth Brandstetter, Peter D. Han, Kairsten Fay, Misja Ilicisin, Kirsten Lacombe, Thomas R. Sibley, Melissa Tuong, Caitlin R. Wolf, Michael Boeckh, Janet A. Englund, Michael Famularo, Barry R. Lutz, Mark J. Rieder, Lea M. Starita, Matthew Thompson, Jay Shendure, Trevor Bedford, Helen Y. Chu                                                                                                                                                                                                                                                                                                 |
| EPI_ISL_1587707, EPI_ISL_1587960                                                                                      | Infinity Biologix                                                                                              | Centers for Disease Control and Prevention Division of Viral Diseases, Pathogen Discovery                                                        | Dakota Howard, Dhvani Batra, Peter W. Cook, Kara Moser, Adrian Paskey, Jason Caravas, Benjamin Rambo-Martin, Shatavia Morrison, Christopher Gulvick, Scott Sammons, Yvette Unoarumhi, Darlene Wagner, Matthew Schmerer, Christian Bixby, Yihe Wang, Jonathan Schultz, Chirayu Goswami, Russ Hager, Robin Grimwood, Clinton R. Paden, Duncan MacCannell                                                                                                                                                                                                                                                                                                                                                                 |
| EPI_ISL_1588140                                                                                                       | NB-Hôpital Georges L. Dumont                                                                                   | National Microbiology Laboratory (NML)                                                                                                           | Anna Majer, Shari Tyson, Grace Seo, Philip Mabon, Elsie Grudeski, Rhianonn Huzarewich, Russell Mandes, Anneliese Landgraff, Jennifer Tanner, Natalie Knox, Morag Graham, Gary Van Domselaar, Richard Garceau, Guillaume Desnoyers, Nathalie Bastien, Yan Li, Timothy Booth, Darian Hole, Madison Chapel, Kirsten Biggar, CanCOGeN's metadata curation team, Public Health Agency of Canada CanCOGeN team                                                                                                                                                                                                                                                                                                               |
| EPI_ISL_1588403                                                                                                       | Infinity Biologix                                                                                              | Centers for Disease Control and Prevention Division of Viral Diseases, Pathogen Discovery                                                        | Dakota Howard, Dhvani Batra, Peter W. Cook, Kara Moser, Adrian Paskey, Jason Caravas, Benjamin Rambo-Martin, Shatavia Morrison, Christopher Gulvick, Scott Sammons, Yvette Unoarumhi, Darlene Wagner, Matthew Schmerer, Christian Bixby, Yihe Wang, Jonathan Schultz, Chirayu Goswami, Russ Hager, Robin Grimwood, Clinton R. Paden, Duncan MacCannell                                                                                                                                                                                                                                                                                                                                                                 |
| EPI_ISL_1589145                                                                                                       | National Virus Reference Laboratory                                                                            | National Virus Reference Laboratory                                                                                                              | Fiona Crispie, Calum Walsh, Matthew McCabe, Zoe Yandle, Charlene Bennet, Gabriel Gonzalez, Michael Carr, Jonathan Dean, Paul Cotter, Cillian F De Gascun                                                                                                                                                                                                                                                                                                                                                                                                                                                                                                                                                               |
| EPI_ISL_1589538, EPI_ISL_1589539, EPI_ISL_1589540                                                                     | National Virus Reference Laboratory                                                                            | National Virus Reference Laboratory                                                                                                              | Zoe Yandle, Charlene Bennett, Gabriel Gonzalez, Michael Carr, Jonathan Dean, Cillian F De Gascun                                                                                                                                                                                                                                                                                                                                                                                                                                                                                                                                                                                                                       |
| EPI_ISL_1592258                                                                                                       | Arizona State University                                                                                       | Arizona State University                                                                                                                         | Peter T. Skidmore, LaRinda A. Holland, Rabia Maqsood, Nicholas J. Mellor, Joy M. Blain, Valerie Harris, Joshua LaBaer, Vel Murugan, Eferm S. Lim                                                                                                                                                                                                                                                                                                                                                                                                                                                                                                                                                                       |
| EPI_ISL_1592448, EPI_ISL_1592595, EPI_ISL_1592615, EPI_ISL_1592738, EPI_ISL_1593054                                   | Helix/Illumina                                                                                                 | Centers for Disease Control and Prevention Division of Viral Diseases, Pathogen Discovery                                                        | Dakota Howard, Dhvani Batra, Peter W. Cook, Kara Moser, Adrian Paskey, Jason Caravas, Benjamin Rambo-Martin, Shatavia Morrison, Christopher Gulvick, Scott Sammons, Yvette Unoarumhi, Darlene Wagner, Matthew Schmerer, Eileen de Feo, Jan Antico, Christine Tran, Matthew Tolentino, Shannon Wickline, Kim Gietzen, Brad Sickler, Jingtao Liu, Eric Allen, Phil Febbo, Nicole L. Washington, Simon White, Geraint Levan, Kelly Schiabor Barrett, Elizabeth Cirulli, Alexandre Bolze, Ary Ascencio, Charlotte Rivera-Garcia, Ryan Cho, Jason Nguyen, Sherry Wang, Jimmy Ramirez, Tyler Cassens, Eren Sandoval, Magnus Isaksson, William Lee, David Becker, Marc Laurent, James Lu, Clinton R. Paden, Duncan MacCannell |
| EPI_ISL_1594444                                                                                                       | Hospital                                                                                                       | National Reference Center for Viruses of Respiratory Infections, Institut Pasteur, Paris                                                         | Marion Barbet, Sylvie Behillil, Frédéric Lemoine, Corinne Maufrais, Christophe Malabat, Amaury Vaysse, Méline Bizard, Angela Brisebarre, Camille Capel, Louise Lefrançois, Etienne Simon-Lorière, Vincent Enouf, Maud Vanpeene, Sylvie van der Werf, Jérôme Guinard                                                                                                                                                                                                                                                                                                                                                                                                                                                    |
| EPI_ISL_1594461                                                                                                       | Lighthouse Lab in Glasgow                                                                                      | Wellcome Sanger Institute for the COVID-19 Genomics UK (COG-UK) Consortium                                                                       | Harper VanSteenhouse, Yumi Kasai, David Gray, Carol Clugston, Anna Dominiczak and Alex Alderton, Roberto Amato, Jeffrey Barrett, Sonia Goncalves, Ewan Harrison, David K. Jackson, Ian Johnston, Dominic Kwiatkowski, Cordelia Langford, John Sillitoe on behalf of the Wellcome Sanger Institute COVID-19 Surveillance Team                                                                                                                                                                                                                                                                                                                                                                                           |
| EPI_ISL_1594934                                                                                                       | Lighthouse Lab in Cambridge                                                                                    | Wellcome Sanger Institute for the COVID-19 Genomics UK (COG-UK) Consortium                                                                       | Rob Howes, The Lighthouse Lab in Cambridge and Alex Alderton, Roberto Amato, Jeffrey Barrett, Sonia Goncalves, Ewan Harrison, David K. Jackson, Ian Johnston, Dominic Kwiatkowski, Cordelia Langford, John Sillitoe on behalf of the Wellcome Sanger Institute COVID-19 Surveillance Team                                                                                                                                                                                                                                                                                                                                                                                                                              |
| EPI_ISL_1595587                                                                                                       | Illinois Department of Public Health - Springfield Lab                                                         | Illinois Department of Public Health - Springfield Lab                                                                                           | Bryan Sim, Gordon McCall                                                                                                                                                                                                                                                                                                                                                                                                                                                                                                                                                                                                                                                                                               |

|                                                                                                                                                                          |                                                                                             |                                                                                                                                                                                                  |                                                                                                                                                                                                                                                                                                                                                                                                                                                                                                                                                                                                                                                                                                                                                                                                                                                                                                                                                                                                                                                 |
|--------------------------------------------------------------------------------------------------------------------------------------------------------------------------|---------------------------------------------------------------------------------------------|--------------------------------------------------------------------------------------------------------------------------------------------------------------------------------------------------|-------------------------------------------------------------------------------------------------------------------------------------------------------------------------------------------------------------------------------------------------------------------------------------------------------------------------------------------------------------------------------------------------------------------------------------------------------------------------------------------------------------------------------------------------------------------------------------------------------------------------------------------------------------------------------------------------------------------------------------------------------------------------------------------------------------------------------------------------------------------------------------------------------------------------------------------------------------------------------------------------------------------------------------------------|
| EPI_ISL_1595837                                                                                                                                                          | Armed Forces Institute of Pathology (AFIP), Dhaka Cantonment                                | Genomic Research Lab, BCSIR                                                                                                                                                                      | Iffat Jahan, Md. Murshed Hasan Sarkar, Mohammad Samir Uzzaman, Eshrar Osman, Md. Ahasan Habib, Shahina Akter, Tanjina Akhter Banu, Abu Sayeed Mohammad Mahmud, Barna Goswami, Md. Saddam Hossain, Mohammad Mohi Uddin, Md. Kamrul Islam, Mohammad Mizanur Rahman, Susane Giti, Md. Salim Khan                                                                                                                                                                                                                                                                                                                                                                                                                                                                                                                                                                                                                                                                                                                                                   |
| EPI_ISL_1599441, EPI_ISL_1599500                                                                                                                                         | National Virus Reference Laboratory                                                         | National Virus Reference Laboratory                                                                                                                                                              | Fiona Crispie, Calum Walsh, Matthew McCabe, Zoe Yandle, Charlene Bennet, Gabriel Gonzalez, Michael Carr, Jonathan Dean, Paul Cotter, Cillian F De Gascun                                                                                                                                                                                                                                                                                                                                                                                                                                                                                                                                                                                                                                                                                                                                                                                                                                                                                        |
| EPI_ISL_1600109                                                                                                                                                          | Platform BIS UZA/UAntwerpen                                                                 | Labo Klinische Biologie, UZA                                                                                                                                                                     | Marie Le Mercier, Jasmine Coppens, Basil Britto Xavier, Christine Lammens, Veerle Matheeußen, Herman Goossens                                                                                                                                                                                                                                                                                                                                                                                                                                                                                                                                                                                                                                                                                                                                                                                                                                                                                                                                   |
| EPI_ISL_1601428                                                                                                                                                          | UW Virology Lab                                                                             | UW Virology Lab                                                                                                                                                                                  | Pavitra Roychoudhury, Hong Xie, Lasata Shrestha, Shah Mohamed Bakhsh, Michelle Lin, Noah R. Baker, Sean Ellis, Saraswathi Sathees, Meei-Li Huang, Keith R Jerome, Alexander Greninger                                                                                                                                                                                                                                                                                                                                                                                                                                                                                                                                                                                                                                                                                                                                                                                                                                                           |
| EPI_ISL_1607887                                                                                                                                                          | TXDSHS                                                                                      | TXDSHS                                                                                                                                                                                           | Rashmi Tuladhar, Bonnie Oh, Jenny Zhang, Maliha Rahman, Mayela Pedrueza, Anita Pokharel, Lorraine Rodriguez, Myong Koag, Chun Wang, Rachel Lee, Grace Kubin                                                                                                                                                                                                                                                                                                                                                                                                                                                                                                                                                                                                                                                                                                                                                                                                                                                                                     |
| EPI_ISL_1608140, EPI_ISL_1608141, EPI_ISL_1608144, EPI_ISL_1608145                                                                                                       | City of Milwaukee Health Department Laboratory                                              | City of Milwaukee Health Department Laboratory                                                                                                                                                   | Sanjib Bhattacharyya                                                                                                                                                                                                                                                                                                                                                                                                                                                                                                                                                                                                                                                                                                                                                                                                                                                                                                                                                                                                                            |
| EPI_ISL_1608725, EPI_ISL_1608761                                                                                                                                         | Maryland Genomics, Institute for Genome Sciences, University of Maryland School of Medicine | Maryland Genomics, Institute for Genome Sciences, University of Maryland School of Medicine                                                                                                      | Tallon, Luke J; Sadzewicz, Lisa D; Humphrys, Mike; Ott, Sandra; Roussey, Holly; Mehta, Aditya; Vavikolanu, Kranthi; Fraser, Claire M; Ravel, Jacques                                                                                                                                                                                                                                                                                                                                                                                                                                                                                                                                                                                                                                                                                                                                                                                                                                                                                            |
| EPI_ISL_1610719                                                                                                                                                          | Laboratory Corporation of America                                                           | Centers for Disease Control and Prevention Division of Viral Diseases, Pathogen Discovery                                                                                                        | Dakota Howard, Dhvani Batra, Peter W. Cook, Kara Moser, Adrian Paskey, Jason Caravas, Benjamin Rambo-Martin, Shatavia Morrison, Christopher Gulvick, Scott Sammons, Yvette Unoarumhi, Darlene Wagner, Matthew Schmerer, Minoq Agarwal, Eyad Almasri, Debbie Boles, Ayla Burns, Nuthavan Charoensri, Oren Cohen, Susan Countryman, Mary Ann Cristobal, Bobbi Croy, Suzanne Dale, Hrushikesh Deshmukh, Amanda Douglas, Vincent Drouillon, Marcia Eisenberg, Howard Engler, Rama Ghatti, Prashant Gupta, Susan Hicks, Jake Humphrey, Lax Iyer, Manoj Jain, Mohan Koli, Brian Krueger, Tim Kuphal, Stanley Letovsky, Michael Levandoski, Craig Lukasik, Jonathan Meltzer, Brian Norvell, Mindy Nye, Scott Parker, Christos Petropoulos, John Pruitt, Steven Ragan, Scott Ryan, Mike Sapeta, Jana Schroth, Suresh Babu Selvaraju, Goran Stevovic, Amanda Suchanek, Andrea Throop, Lyndon Tilson, Thomas Urban, Joe Yoshell, Kimberly Wagner, Jonathan Williams, Mary Williamson, Qian Zeng, Tricia Zwiefelhofer, Clinton R. Paden, Duncan MacCannell |
| EPI_ISL_1614629, EPI_ISL_1614901                                                                                                                                         | Fulgent Genetics                                                                            | Centers for Disease Control and Prevention Division of Viral Diseases, Pathogen Discovery                                                                                                        | Dakota Howard, Dhvani Batra, Peter W. Cook, Kara Moser, Adrian Paskey, Jason Caravas, Benjamin Rambo-Martin, Shatavia Morrison, Christopher Gulvick, Scott Sammons, Yvette Unoarumhi, Darlene Wagner, Matthew Schmerer, Harry Gao, Mickey Li, John Gao, Joseph Fierro, Benafsh Sapra, Becky Tsai, Yan Meng, Doreen Ng, James Xie, Clinton R. Paden, Duncan MacCannell                                                                                                                                                                                                                                                                                                                                                                                                                                                                                                                                                                                                                                                                           |
| EPI_ISL_1616642                                                                                                                                                          | UW Virology Lab                                                                             | UW Virology Lab                                                                                                                                                                                  | Pavitra Roychoudhury, Hong Xie, Lasata Shrestha, Shah Mohamed Bakhsh, Michelle Lin, Noah R. Baker, Sean Ellis, Saraswathi Sathees, Meei-Li Huang, Keith R Jerome, Alexander Greninger                                                                                                                                                                                                                                                                                                                                                                                                                                                                                                                                                                                                                                                                                                                                                                                                                                                           |
| EPI_ISL_1617339                                                                                                                                                          | U.O. Microbiologia, Laboratorio Unico Centro Servizi - AUSL della Romagna                   | U.O. Microbiologia, Laboratorio Unico Centro Servizi - AUSL della Romagna                                                                                                                        | Giorgio Dirani, Silvia Zannoli, Vittorio Sambri, Giulia Gatti, Francesca Taddei, Ilaria Poggianti                                                                                                                                                                                                                                                                                                                                                                                                                                                                                                                                                                                                                                                                                                                                                                                                                                                                                                                                               |
| EPI_ISL_1620171                                                                                                                                                          | MRCG at LSHTM Genomics lab                                                                  | MRCG at LSHTM Genomics lab                                                                                                                                                                       | Abdul Karim sesay, Abdoulie Kante, Jarra Manneh, Mariama Kujabi, Bakary Sanyang                                                                                                                                                                                                                                                                                                                                                                                                                                                                                                                                                                                                                                                                                                                                                                                                                                                                                                                                                                 |
| EPI_ISL_1620442                                                                                                                                                          | National Virus Reference Laboratory                                                         | National Virus Reference Laboratory                                                                                                                                                              | Zoe Yandle, Charlene Bennett, Gabriel Gonzalez, Michael Carr, Jonathan Dean, Cillian F De Gascun                                                                                                                                                                                                                                                                                                                                                                                                                                                                                                                                                                                                                                                                                                                                                                                                                                                                                                                                                |
| EPI_ISL_1623000                                                                                                                                                          | National Virus Reference Laboratory                                                         | National Virus Reference Laboratory                                                                                                                                                              | Fiona Crispie, Calum Walsh, Matthew McCabe, Zoe Yandle, Charlene Bennet, Gabriel Gonzalez, Michael Carr, Jonathan Dean, Paul Cotter, Cillian F De Gascun                                                                                                                                                                                                                                                                                                                                                                                                                                                                                                                                                                                                                                                                                                                                                                                                                                                                                        |
| EPI_ISL_1623100                                                                                                                                                          | CNR Virus des Infections Respiratoires - France SUD                                         | CNR Virus des Infections Respiratoires - France SUD                                                                                                                                              | Antonin Bal, Gregory Destras, Gwendolynne Burfin, Hadrien Regue, Quentin Semanas, Martine Valette, Bruno Lina, Laurence Josset                                                                                                                                                                                                                                                                                                                                                                                                                                                                                                                                                                                                                                                                                                                                                                                                                                                                                                                  |
| EPI_ISL_1623559, EPI_ISL_1623560, EPI_ISL_1623561                                                                                                                        | NOVABIO DORDOGNE                                                                            | CNR Virus des Infections Respiratoires - France SUD                                                                                                                                              | Antonin Bal, Gregory Destras, Gwendolynne Burfin, Hadrien Regue, Quentin Semanas, Martine Valette, Bruno Lina, Laurence Josset                                                                                                                                                                                                                                                                                                                                                                                                                                                                                                                                                                                                                                                                                                                                                                                                                                                                                                                  |
| EPI_ISL_1623589                                                                                                                                                          | CNR Virus des Infections Respiratoires - France SUD                                         | CNR Virus des Infections Respiratoires - France SUD                                                                                                                                              | Antonin Bal, Gregory Destras, Gwendolynne Burfin, Hadrien Regue, Quentin Semanas, Martine Valette, Bruno Lina, Laurence Josset                                                                                                                                                                                                                                                                                                                                                                                                                                                                                                                                                                                                                                                                                                                                                                                                                                                                                                                  |
| EPI_ISL_1623694                                                                                                                                                          | Oregon State Public Health Laboratory                                                       | Oregon State Public Health Laboratory                                                                                                                                                            | Rafia Razzaque, Eugene Yeboah, Vanda Makris, Laura Tsaknaidis, John Fontana and Shane Sevey                                                                                                                                                                                                                                                                                                                                                                                                                                                                                                                                                                                                                                                                                                                                                                                                                                                                                                                                                     |
| EPI_ISL_1624685                                                                                                                                                          | Massachusetts State Public Health Laboratory                                                | Massachusetts State Public Health Laboratory                                                                                                                                                     | Andrew Lang, Timelia Fink, Glen Gallagher, Sandra Smole                                                                                                                                                                                                                                                                                                                                                                                                                                                                                                                                                                                                                                                                                                                                                                                                                                                                                                                                                                                         |
| EPI_ISL_1624899                                                                                                                                                          | QLabs                                                                                       | WVU and Marshall University Combined Genomics Core Facilities                                                                                                                                    | James Denvir, Peter Stoilov, Peter Perrotta, Wesley Kimble, Ryan Percifield                                                                                                                                                                                                                                                                                                                                                                                                                                                                                                                                                                                                                                                                                                                                                                                                                                                                                                                                                                     |
| EPI_ISL_1625278                                                                                                                                                          | National Laboratory for Health, Environment and Food, OMM, Celje                            | NLZOH (National Laboratory for Health, Environment and Food) / CISLD (Clinical Institute of Special Laboratory Diagnostics), University Children's Hospital, University Medical Center Ljubljana | Sandra Janezic, Aleksander Mahnic, Maja Rupnik, Tjasa Žohar retnik, Alenka Štorman, Nika Gobec, Aleksander Kocuvan, Kaja Tominc, Maša Jari, Mateja Borinc, Daša Kavka / Jernej Kova, Barbara Jenko Bizjan, Tine Tesovnik, Robert Šket, Katarina Kozmos, Ana Grom, Maruša Debeljak, Marko Pokorn, Tadej Battelino                                                                                                                                                                                                                                                                                                                                                                                                                                                                                                                                                                                                                                                                                                                                |
| EPI_ISL_1626057, EPI_ISL_1626199, EPI_ISL_1626418                                                                                                                        | Wisconsin State Laboratory of Hygiene Communicable Disease Division                         | Wisconsin State Laboratory of Hygiene Communicable Disease Division                                                                                                                              | Kelsey R. Florek, Abigail C. Shockey                                                                                                                                                                                                                                                                                                                                                                                                                                                                                                                                                                                                                                                                                                                                                                                                                                                                                                                                                                                                            |
| EPI_ISL_1626567                                                                                                                                                          | Ospedale San Giovanni Evangelista                                                           | INMI Lazzaro Spallanzani IRCCS                                                                                                                                                                   | B Bartolini, E Giombini, F Messina, M Rueca, G Bonfiglio, O Butera, CEM Gruber, F Santini, D Di Fusco, D Cerini, A Di Caro, MR Capobianchi                                                                                                                                                                                                                                                                                                                                                                                                                                                                                                                                                                                                                                                                                                                                                                                                                                                                                                      |
| EPI_ISL_1626568                                                                                                                                                          | Ospedale San Giovanni Evangelista                                                           | INMI Lazzaro Spallanzani IRCCS                                                                                                                                                                   | F Messina, M Rueca, G Bonfiglio, O Butera, CEM Gruber, F Santini, B Bartolini, E Giombini, D Di Fusco, D Cerini, A Di Caro, MR Capobianchi                                                                                                                                                                                                                                                                                                                                                                                                                                                                                                                                                                                                                                                                                                                                                                                                                                                                                                      |
| EPI_ISL_1627448, EPI_ISL_1627449, EPI_ISL_1627450                                                                                                                        | Baylor Scott & White-Temple                                                                 | Baylor Scott & White-Temple                                                                                                                                                                      | Ari Rao, Linden Morales, Kimberly Walker, Marcus Volz, Shelby Hendrickson, Caitlin Maloney                                                                                                                                                                                                                                                                                                                                                                                                                                                                                                                                                                                                                                                                                                                                                                                                                                                                                                                                                      |
| EPI_ISL_1629810                                                                                                                                                          | Armed Forces Institute of Pathology (AFIP), Dhaka Cantonment                                | Genomic Research Lab, BCSIR                                                                                                                                                                      | Md. Murshed Hasan Sarkar, Mohammad Samir Uzzaman, Eshrar Osman, Md. Ahasan Habib, Shahina Akter, Tanjina Akhter Banu, Abu Sayeed Mohammad Mahmud, Barna Goswami, Iffat Jahan, Md. Saddam Hossain, Mohammad Mohi Uddin, Md. Kamrul Islam, Mohammad Mizanur Rahman, Susane Giti, Md. Salim Khan                                                                                                                                                                                                                                                                                                                                                                                                                                                                                                                                                                                                                                                                                                                                                   |
| EPI_ISL_1630170, EPI_ISL_1630204, EPI_ISL_1630205, EPI_ISL_1630206, EPI_ISL_1630208, EPI_ISL_1630247, EPI_ISL_1630248, EPI_ISL_1630249, EPI_ISL_1630250, EPI_ISL_1630251 | Central Public Health Lab, National Public Health Organization                              | Central Public Health Lab, National Public Health Organization                                                                                                                                   | Kyriaki Tryfinopoulou et al                                                                                                                                                                                                                                                                                                                                                                                                                                                                                                                                                                                                                                                                                                                                                                                                                                                                                                                                                                                                                     |
| EPI_ISL_1630526, EPI_ISL_1630585, EPI_ISL_1630785                                                                                                                        | Lighthouse Lab in Alderley Park                                                             | Wellcome Sanger Institute for the COVID-19 Genomics UK (COG-UK) Consortium                                                                                                                       | Jacquelyn Wynn, Mairead Hyland, The Lighthouse Lab in Alderley Park and Alex Alderton, Roberto Amato, Jeffrey Barrett, Sonia Goncalves, Ewan Harrison, David K. Jackson, Ian Johnston, Dominic Kwiatkowski, Cordelia Langford, John Sillitoe on behalf of the Wellcome Sanger Institute COVID-19 Surveillance Team                                                                                                                                                                                                                                                                                                                                                                                                                                                                                                                                                                                                                                                                                                                              |
| EPI_ISL_1631202                                                                                                                                                          | Randox Laboratories                                                                         | Wellcome Sanger Institute for the COVID-19 Genomics UK (COG-UK) Consortium                                                                                                                       | Randox Laboratories and Alex Alderton, Roberto Amato, Jeffrey Barrett, Sonia Goncalves, Ewan Harrison, David K. Jackson, Ian Johnston, Dominic Kwiatkowski, Cordelia Langford, John Sillitoe on behalf of the Wellcome Sanger Institute COVID-19 Surveillance Team                                                                                                                                                                                                                                                                                                                                                                                                                                                                                                                                                                                                                                                                                                                                                                              |
| EPI_ISL_1631424                                                                                                                                                          | Lighthouse Lab in Cambridge                                                                 | Wellcome Sanger Institute for the COVID-19 Genomics UK (COG-UK) Consortium                                                                                                                       | Rob Howes, The Lighthouse Lab in Cambridge and Alex Alderton, Roberto Amato, Jeffrey Barrett, Sonia Goncalves, Ewan Harrison, David K. Jackson, Ian Johnston, Dominic Kwiatkowski, Cordelia Langford, John Sillitoe on behalf of the Wellcome Sanger Institute COVID-19 Surveillance Team                                                                                                                                                                                                                                                                                                                                                                                                                                                                                                                                                                                                                                                                                                                                                       |
| EPI_ISL_1631458, EPI_ISL_1631470, EPI_ISL_1631517                                                                                                                        | Lighthouse Lab in Milton Keynes                                                             | Wellcome Sanger Institute for the COVID-19 Genomics UK (COG-UK) Consortium                                                                                                                       | The Lighthouse Lab in Milton Keynes and Alex Alderton, Roberto Amato, Jeffrey Barrett, Sonia Goncalves, Ewan Harrison, David K. Jackson, Ian Johnston, Dominic Kwiatkowski, Cordelia Langford, John Sillitoe on behalf of the Wellcome Sanger Institute COVID-19 Surveillance Team                                                                                                                                                                                                                                                                                                                                                                                                                                                                                                                                                                                                                                                                                                                                                              |
| EPI_ISL_1632299                                                                                                                                                          | Lighthouse Lab in Cambridge                                                                 | Wellcome Sanger Institute for the COVID-19 Genomics UK (COG-UK) Consortium                                                                                                                       | Rob Howes, The Lighthouse Lab in Cambridge and Alex Alderton, Roberto Amato, Jeffrey Barrett, Sonia Goncalves, Ewan Harrison, David K. Jackson, Ian Johnston, Dominic Kwiatkowski, Cordelia Langford, John Sillitoe on behalf of the Wellcome Sanger Institute COVID-19 Surveillance Team                                                                                                                                                                                                                                                                                                                                                                                                                                                                                                                                                                                                                                                                                                                                                       |
| EPI_ISL_1632568, EPI_ISL_1632586, EPI_ISL_1632612, EPI_ISL_1632614, EPI_ISL_1632699                                                                                      | Virginia Division of Consolidated Laboratory Services                                       | Virginia Division of Consolidated Laboratory Services                                                                                                                                            | Virginia DCLS                                                                                                                                                                                                                                                                                                                                                                                                                                                                                                                                                                                                                                                                                                                                                                                                                                                                                                                                                                                                                                   |



|                                                                                                                                                                                                                             |                                                                                                                         |                                                                                           |                                                                                                                                                                                                                                                                                                                                                                      |
|-----------------------------------------------------------------------------------------------------------------------------------------------------------------------------------------------------------------------------|-------------------------------------------------------------------------------------------------------------------------|-------------------------------------------------------------------------------------------|----------------------------------------------------------------------------------------------------------------------------------------------------------------------------------------------------------------------------------------------------------------------------------------------------------------------------------------------------------------------|
| EPI_ISL_1633308                                                                                                                                                                                                             | Central Public Health Lab, National Public Health Organization                                                          | Central Public Health Lab, National Public Health Organization                            | Kyriaki Tryfinopoulou et al                                                                                                                                                                                                                                                                                                                                          |
| EPI_ISL_1633326, EPI_ISL_1633328, EPI_ISL_1633329                                                                                                                                                                           | Microbiology Lab, University Hospital ATTIKON                                                                           | Central Public Health Lab, National Public Health Organization                            | Kyriaki Tryfinopoulou et al                                                                                                                                                                                                                                                                                                                                          |
| EPI_ISL_1633484                                                                                                                                                                                                             | Genetica Molecular and Subdepartamento de Virologia ISP Chile                                                           | Instituto de Salud Publica de Chile                                                       | Javier Tognarelli, Karen Orostica, Barbara Parra, Loredana Arata, Jaime Lagos, Gisselle Barra, Patricia Bustos, Rodrigo Fasce, Andres Castillo, Jorge Fernandez                                                                                                                                                                                                      |
| EPI_ISL_1633856, EPI_ISL_1633888, EPI_ISL_1633924, EPI_ISL_1634040, EPI_ISL_1634103                                                                                                                                         | Pandemic Response Lab - NYC                                                                                             | Pandemic Response Lab, R&D                                                                | Henry Lee, Michael Hammerling, Melissa Hopkins, Cybill del Castillo, Shinyoung Clair Kang, William Ward, Pradeep Bugga, Sol Rey, Dylan Law, Katharine Nelson, Haiping Hao, Jon Laurent                                                                                                                                                                               |
| EPI_ISL_1634457                                                                                                                                                                                                             | Child Health Research Foundation                                                                                        | Child Health Research Foundation                                                          | CHRF Bangladesh Genomics Team                                                                                                                                                                                                                                                                                                                                        |
| EPI_ISL_1634855                                                                                                                                                                                                             | Lighthouse Lab in Glasgow                                                                                               | Wellcome Sanger Institute for the COVID-19 Genomics UK (COG-UK) Consortium                | Harper VanSteenhouse, Yumi Kasai, David Gray, Carol Clugston, Anna Dominiczak and Alex Alderton, Roberto Amato, Jeffrey Barrett, Sonia Goncalves, Ewan Harrison, David K. Jackson, Ian Johnston, Dominic Kwiatkowski, Cordelia Langford, John Sillitoe on behalf of the Wellcome Sanger Institute COVID-19 Surveillance Team                                         |
| EPI_ISL_1635440, EPI_ISL_1635586, EPI_ISL_1635919, EPI_ISL_1635976, EPI_ISL_1636070, EPI_ISL_1636154, EPI_ISL_1636162, EPI_ISL_1636188, EPI_ISL_1636264, EPI_ISL_1636319, EPI_ISL_1636322, EPI_ISL_1636326                  | see above                                                                                                               | Pandemic Response Lab - NYC                                                               | Pandemic Response Lab, R&D                                                                                                                                                                                                                                                                                                                                           |
| EPI_ISL_1636701                                                                                                                                                                                                             | Virology Department, Royal Infirmary of Edinburgh, NHS Lothian / School of Biological Sciences, University of Edinburgh | COVID-19 Genomics UK (COG-UK) Consortium                                                  | McHugh M, Dewar R, Cotton S, Rooke S, O'Toole Á, Scher E, Hill V, McCrone JT, Colquhoun R, Yu X, Jackson B, Rambaut A, Templeton K                                                                                                                                                                                                                                   |
| EPI_ISL_1651307                                                                                                                                                                                                             | CHU Nantes Virology                                                                                                     | CHU Nantes Virology                                                                       | Celine Bressollette-Bodin, Thomas Drumel, Audrey Rodallec, Berthe-Marie Imbert-Marcille                                                                                                                                                                                                                                                                              |
| EPI_ISL_1651724, EPI_ISL_1651747, EPI_ISL_1651748                                                                                                                                                                           | National Virus Reference Laboratory                                                                                     | National Virus Reference Laboratory                                                       | Zoe Yandle, Charlene Bennett, Gabriel Gonzalez, Michael Carr, Jonathan Dean, Cillian F De Gascun                                                                                                                                                                                                                                                                     |
| EPI_ISL_1652116                                                                                                                                                                                                             | National Public Health Laboratory, National Centre for Infectious Diseases                                              | National Public Health Laboratory, National Centre for Infectious Diseases                | Tze Minn Mak, Zhenyang Zhou, Grace Jie Yin Ngan, Royce Ang, Lin Cui, Raymond Tzer Pin Lin                                                                                                                                                                                                                                                                            |
| EPI_ISL_1653553                                                                                                                                                                                                             | Lighthouse Lab in Cambridge                                                                                             | Wellcome Sanger Institute for the COVID-19 Genomics UK (COG-UK) Consortium                | Rob Howes, The Lighthouse Lab in Cambridge and Alex Alderton, Roberto Amato, Jeffrey Barrett, Sonia Goncalves, Ewan Harrison, David K. Jackson, Ian Johnston, Dominic Kwiatkowski, Cordelia Langford, John Sillitoe on behalf of the Wellcome Sanger Institute COVID-19 Surveillance Team                                                                            |
| EPI_ISL_1653694                                                                                                                                                                                                             | Institute of Tropical Medicine                                                                                          | Institute of Tropical Medicine                                                            | Prof. Dr. Thirumalaisamy P. Velavan and Prof. Dr. Peter Kremsner                                                                                                                                                                                                                                                                                                     |
| EPI_ISL_1653711                                                                                                                                                                                                             | Lighthouse Lab in Alderley Park                                                                                         | Wellcome Sanger Institute for the COVID-19 Genomics UK (COG-UK) Consortium                | Jacquelyn Wynn, Mairead Hyland, The Lighthouse Lab in Alderley Park and Alex Alderton, Roberto Amato, Jeffrey Barrett, Sonia Goncalves, Ewan Harrison, David K. Jackson, Ian Johnston, Dominic Kwiatkowski, Cordelia Langford, John Sillitoe on behalf of the Wellcome Sanger Institute COVID-19 Surveillance Team                                                   |
| EPI_ISL_1656577, EPI_ISL_1656578                                                                                                                                                                                            | MEPHI, Aix Marseille University                                                                                         | MEPHI, Aix Marseille University                                                           | Anthony LEVASSEUR                                                                                                                                                                                                                                                                                                                                                    |
| EPI_ISL_1657685, EPI_ISL_1657686, EPI_ISL_1657687, EPI_ISL_1657688, EPI_ISL_1657689, EPI_ISL_1657690, EPI_ISL_1657691, EPI_ISL_1657692, EPI_ISL_1657693, EPI_ISL_1657694, EPI_ISL_1657695, EPI_ISL_1657696, EPI_ISL_1657697 | see above                                                                                                               | National Virus Reference Laboratory                                                       | National Virus Reference Laboratory                                                                                                                                                                                                                                                                                                                                  |
| EPI_ISL_1659075, EPI_ISL_1659076                                                                                                                                                                                            | Viollier AG                                                                                                             | Department of Biosystems Science and Engineering, ETH Zurich                              | Zoe Yandle, Charlene Bennett, Gabriel Gonzalez, Michael Carr, Jonathan Dean, Cillian F De Gascun                                                                                                                                                                                                                                                                     |
| EPI_ISL_1660084, EPI_ISL_1660099, EPI_ISL_1660100, EPI_ISL_1660106, EPI_ISL_1660115, EPI_ISL_1660116                                                                                                                        | Swedish national genomic surveillance program of SARS-CoV-2                                                             | The Public Health Agency of Sweden                                                        | Maximilian Riess, Maria Lind Karlberg, Alma Brolund, Swedish national genomic surveillance program of SARS-CoV-2                                                                                                                                                                                                                                                     |
| EPI_ISL_1660670                                                                                                                                                                                                             | SYNLAB                                                                                                                  | GIGA Medical Genomics                                                                     | Keith Durkin, Maria Artesi, Sébastien Bontems, Raphaël Boreux, Bouchra Boujemla, Nathalie Renotte, Cécile Meex, Pierrette Melin, Marie-Pierre Hayette, Vincent Bours                                                                                                                                                                                                 |
| EPI_ISL_1661079                                                                                                                                                                                                             | Platform BIS UZA/UAntwerpen                                                                                             | Labo Klinische Biologie, UZA                                                              | Jasmine Coppens, Marie Le Mercier, Basil Britto Xavier, Christine Lammens, Veerle Matheeußen, Herman Goossens                                                                                                                                                                                                                                                        |
| EPI_ISL_1662826, EPI_ISL_1662858                                                                                                                                                                                            | Johns Hopkins Hospital Department of Pathology                                                                          | Johns Hopkins Hospital Department of Pathology                                            | C. Paul Morris, Chun Huai Luo, Adannaya Amadi, Matthew Schwartz, Heba H. Mostafa                                                                                                                                                                                                                                                                                     |
| EPI_ISL_1663091, EPI_ISL_1663100                                                                                                                                                                                            | Illinois Department of Public Health                                                                                    | Illinois Department of Public Health - Chicago Lab                                        | Vineet K. Dhiman, Ira Heimler                                                                                                                                                                                                                                                                                                                                        |
| EPI_ISL_1664094                                                                                                                                                                                                             | Santa Clara County Public Health Laboratory                                                                             | Chan-Zuckerberg Biohub                                                                    | CZB Ciihub Consortium                                                                                                                                                                                                                                                                                                                                                |
| EPI_ISL_1666406, EPI_ISL_1666556                                                                                                                                                                                            | Fulgent Genetics                                                                                                        | Centers for Disease Control and Prevention Division of Viral Diseases, Pathogen Discovery | Dakota Howard, Dhvani Batra, Peter W. Cook, Kara Moser, Adrian Paskey, Jason Caravas, Benjamin Rambo-Martin, Shatavia Morrison, Christopher Gulvick, Scott Sammons, Yvette Unoarumhi, Darlene Wagner, Matthew Schmeer, Harry Gao, Mickey Li, John Gao, Joseph Fierro, Benafsh Sapra, Becky Tsai, Yan Meng, Doreen Ng, James Xie, Clinton R. Paden, Duncan MacCannell |
| EPI_ISL_1668834, EPI_ISL_1668835                                                                                                                                                                                            | Institute of Microbiology and Immunology, Faculty of Medicine, University of Ljubljana                                  | Institute of Microbiology and Immunology, Faculty of Medicine, University of Ljubljana    | Alen Sulji, Samo Zakotnik, Tomaž Mark Zorec, Matic Brvar, Doroteja Vljaj, Andraž Celar, Dominika Šturm, Patricija Pozvek, Špela Pleh, Miša Korva, Mario Poljak, Tatjana Avši - Županc                                                                                                                                                                                |
| EPI_ISL_1669871                                                                                                                                                                                                             | Platform BIS UZA/UAntwerpen                                                                                             | UAntwerp, Laboratory of Medical Microbiology                                              | Basil Britto Xavier, Jasmine Coppens, Marie Le Mercier, Christine Lammens, Veerle Matheeußen, Herman Goossens                                                                                                                                                                                                                                                        |
| EPI_ISL_1670056                                                                                                                                                                                                             | Institute of Medical Microbiology and Hospital Hygiene                                                                  | Institute of Medical Microbiology and Hospital Hygiene                                    | Prof. Dr. Achim Kaasch, Aljoscha Tersteegen                                                                                                                                                                                                                                                                                                                          |
| EPI_ISL_1670178, EPI_ISL_1670227, EPI_ISL_1670230, EPI_ISL_1670231, EPI_ISL_1670320, EPI_ISL_1670321, EPI_ISL_1670322, EPI_ISL_1670326, EPI_ISL_1670375, EPI_ISL_1670442                                                    | Landesamt für Verbraucherschutz Sachsen Anhalt, Magdeburg                                                               | Institute of Medical Microbiology and Hospital Hygiene                                    | Prof. Dr. Achim Kaasch, Aljoscha Tersteegen                                                                                                                                                                                                                                                                                                                          |
| EPI_ISL_1670499                                                                                                                                                                                                             | Institute of Medical Microbiology and Hospital Hygiene                                                                  | Institute of Medical Microbiology and Hospital Hygiene                                    | Prof. Dr. Achim Kaasch, Aljoscha Tersteegen                                                                                                                                                                                                                                                                                                                          |
| EPI_ISL_1670527, EPI_ISL_1670528, EPI_ISL_1670529                                                                                                                                                                           | Landesamt für Verbraucherschutz Sachsen Anhalt, Magdeburg                                                               | Institute of Medical Microbiology and Hospital Hygiene                                    | Prof. Dr. Achim Kaasch, Aljoscha Tersteegen                                                                                                                                                                                                                                                                                                                          |
| EPI_ISL_1671633                                                                                                                                                                                                             | NORTHWELL HEALTH LABORATORIES                                                                                           | Wadsworth Center, New York State Department of Health                                     | Kirsten St. George, Daryl M. Lamson, Alexis Russell, Matthew Shudt, Melissa A Leisner, Jonathan Plitnick, Catharine Prussing, Navjot Singh, John Kelly, Erasmus Schneider, Erica Lasek-Nesselquist                                                                                                                                                                   |
| EPI_ISL_1672197, EPI_ISL_1672198, EPI_ISL_1672199                                                                                                                                                                           | I.F.A.C. Hoptal Princesse Paola                                                                                         | GIGA Medical Genomics                                                                     | Keith Durkin, Maria Artesi, Sébastien Bontems, Raphaël Boreux, Bouchra Boujemla, Nathalie Renotte, Cécile Meex, Pierrette Melin, Marie-Pierre Hayette, Vincent Bours                                                                                                                                                                                                 |
| EPI_ISL_1675032                                                                                                                                                                                                             | Labo Analyses Med                                                                                                       | National Reference Center for Viruses of Respiratory Infections, Institut Pasteur, Paris  | Marion Barbet, Sylvie Behillil, Méline Bizard, Angela Brisebarre, Camille Capel, Vincent Enouf, Louise Lefrançois, Frédéric Lemoine, Christophe Malabat, Corinne Maufrais, Adrien Pain, Etienne Simon-Lorière, Maud Vanpeene, Sylvie Van der Werf, Alexandra Ducancellle                                                                                             |
| EPI_ISL_1679849                                                                                                                                                                                                             | UW Virology Lab                                                                                                         | UW Virology Lab                                                                           | Pavitra Roychoudhury, Hong Xie, Lasata Shrestha, Shah Mohamed Bakhsh, Michelle Lin, Noah R. Baker, Sean Ellis, Meei-Li Huang, Keith R Jerome, Alexander Greninger                                                                                                                                                                                                    |
| EPI_ISL_1688417                                                                                                                                                                                                             | Lab voor klinische biologie                                                                                             | Lab voor klinische biologie                                                               | Marija Janevska, Hannelore Hamerlinck, Bruno Verhasselt                                                                                                                                                                                                                                                                                                              |

|                                                                                                                                                                                                                                                                                                                                                                                                                                                                                                                                               |                                                                                                 |                                                                                                         |                                                                                                                                                                                                                                                                                                                                                                                                                                                                                                                                                                                                                                                                                                                                                                                                                                                                                                                                                                                                                                                                                  |
|-----------------------------------------------------------------------------------------------------------------------------------------------------------------------------------------------------------------------------------------------------------------------------------------------------------------------------------------------------------------------------------------------------------------------------------------------------------------------------------------------------------------------------------------------|-------------------------------------------------------------------------------------------------|---------------------------------------------------------------------------------------------------------|----------------------------------------------------------------------------------------------------------------------------------------------------------------------------------------------------------------------------------------------------------------------------------------------------------------------------------------------------------------------------------------------------------------------------------------------------------------------------------------------------------------------------------------------------------------------------------------------------------------------------------------------------------------------------------------------------------------------------------------------------------------------------------------------------------------------------------------------------------------------------------------------------------------------------------------------------------------------------------------------------------------------------------------------------------------------------------|
| EPI_ISL_1691149                                                                                                                                                                                                                                                                                                                                                                                                                                                                                                                               | Helix/Illumina                                                                                  | Centers for Disease Control and Prevention Division of Viral Diseases, Pathogen Discovery               | Dakota Howard, Dhvani Batra, Peter W. Cook, Kara Moser, Adrian Paskey, Jason Caravas, Benjamin Rambo-Martin, Shatavia Morrison, Christopher Gulvick, Scott Sammons, Yvette Unoarumhi, Darlene Wagner, Matthew Schmerer, Eileen de Feo, Jan Antico, Christine Tran, Matthew Tolentino, Shannon Wickline, Kim Gietzen, Brad Sickler, Jingtao Liu, Eric Allen, Phil Febbo, Nicole L. Washington, Simon White, Geraint Levan, Kelly Schiabor Barrett, Elizabeth Cirulli, Alexandre Bolze, Ary Ascencio, Charlotte Rivera-Garcia, Ryan Cho, Jason Nguyen, Sherry Wang, Jimmy Ramirez, Tyler Cassens, Efrén Sandoval, Magnus Isaksson, William Lee, David Becker, Marc Laurent, James Lu, Clinton R. Paden, Duncan MacCannell                                                                                                                                                                                                                                                                                                                                                          |
| EPI_ISL_1694705                                                                                                                                                                                                                                                                                                                                                                                                                                                                                                                               | DOHMH Morrisania                                                                                | New York City Public Health Laboratory                                                                  | Jade Wang, et al.                                                                                                                                                                                                                                                                                                                                                                                                                                                                                                                                                                                                                                                                                                                                                                                                                                                                                                                                                                                                                                                                |
| EPI_ISL_1695011                                                                                                                                                                                                                                                                                                                                                                                                                                                                                                                               | Laboratory Corporation of America                                                               | Centers for Disease Control and Prevention Division of Viral Diseases, Pathogen Discovery               | Dakota Howard, Dhvani Batra, Peter W. Cook, Kara Moser, Adrian Paskey, Jason Caravas, Benjamin Rambo-Martin, Shatavia Morrison, Christopher Gulvick, Scott Sammons, Yvette Unoarumhi, Darlene Wagner, Matthew Schmerer, Mino Agarwal, Eyad Almasri, Debbie Boles, Ayla Burns, Nuthawin Charoensri, Oren Cohen, Susan Countryman, Mary Ann Cristobal, Bobbi Croy, Suzanne Dale, Hrushikesh Deshmukh, Amanda Douglas, Vincent Drouillon, Marcia Eisenberg, Howard Engler, Rama Ghatti, Prashant Gupta, Susan Hicks, Jake Humphrey, Lax Iyer, Manoj Jain, Mohan Kolli, Brian Krueger, Tim Kuphal, Stanley Letovsky, Michael Levandoski, Craig Lukasik, Jonathan Meltzer, Brian Norvell, Mindy Nye, Scott Parker, Christos Petropoulos, John Pruitt, Steven Ragan, Scott Ryan, Mike Sapeta, Jana Schroth, Suresh Babu Selvaraju, Goran Stevovic, Amanda Suchanek, Andrea Theodorou, Lyndon Tilson, Thomas Urban, Joe Voshell, Kimberly Wagner, Jonathan Williams, Mary Williamson, Qian Zeng, Tricia Zwiefelhofer, Clinton R. Paden, Duncan MacCannell                               |
| EPI_ISL_1696589, EPI_ISL_1696621, EPI_ISL_1696640, EPI_ISL_1696648                                                                                                                                                                                                                                                                                                                                                                                                                                                                            | National Virus Reference Laboratory                                                             | National Virus Reference Laboratory                                                                     | Zoe Yandle, Charlene Bennett, Gabriel Gonzalez, Michael Carr, Jonathan Dean, Cillian F De Gascun                                                                                                                                                                                                                                                                                                                                                                                                                                                                                                                                                                                                                                                                                                                                                                                                                                                                                                                                                                                 |
| EPI_ISL_1697343                                                                                                                                                                                                                                                                                                                                                                                                                                                                                                                               | Platform BIS UZA/UAntwerpen                                                                     | Labo Klinische Biologie, UZA                                                                            | Jasmine Coppens, Marie Le Mercier, Basil Britto Xavier, Christine Lammens, Veerle Matheeußen, Herman Goossens                                                                                                                                                                                                                                                                                                                                                                                                                                                                                                                                                                                                                                                                                                                                                                                                                                                                                                                                                                    |
| EPI_ISL_1697469                                                                                                                                                                                                                                                                                                                                                                                                                                                                                                                               | Lighthouse Lab in Cambridge                                                                     | Wellcome Sanger Institute for the COVID-19 Genomics UK (COG-UK) Consortium                              | Rob Howes, The Lighthouse Lab in Cambridge and Alex Alderton, Roberto Amato, Jeffrey Barrett, Sonia Goncalves, Ewan Harrison, David K. Jackson, Ian Johnston, Dominic Kwiatkowski, Cordelia Langford, John Sillitoe on behalf of the Wellcome Sanger Institute COVID-19 Surveillance Team                                                                                                                                                                                                                                                                                                                                                                                                                                                                                                                                                                                                                                                                                                                                                                                        |
| EPI_ISL_1697555                                                                                                                                                                                                                                                                                                                                                                                                                                                                                                                               | Lighthouse Lab in Alderley Park                                                                 | Wellcome Sanger Institute for the COVID-19 Genomics UK (COG-UK) Consortium                              | Jacquelyn Wynn, Mairead Hyland, The Lighthouse Lab in Alderley Park and Alex Alderton, Roberto Amato, Jeffrey Barrett, Sonia Goncalves, Ewan Harrison, David K. Jackson, Ian Johnston, Dominic Kwiatkowski, Cordelia Langford, John Sillitoe on behalf of the Wellcome Sanger Institute COVID-19 Surveillance Team                                                                                                                                                                                                                                                                                                                                                                                                                                                                                                                                                                                                                                                                                                                                                               |
| EPI_ISL_1697946, EPI_ISL_1698475                                                                                                                                                                                                                                                                                                                                                                                                                                                                                                              | Lighthouse Lab in Cambridge                                                                     | Wellcome Sanger Institute for the COVID-19 Genomics UK (COG-UK) Consortium                              | Rob Howes, The Lighthouse Lab in Cambridge and Alex Alderton, Roberto Amato, Jeffrey Barrett, Sonia Goncalves, Ewan Harrison, David K. Jackson, Ian Johnston, Dominic Kwiatkowski, Cordelia Langford, John Sillitoe on behalf of the Wellcome Sanger Institute COVID-19 Surveillance Team                                                                                                                                                                                                                                                                                                                                                                                                                                                                                                                                                                                                                                                                                                                                                                                        |
| EPI_ISL_1699054                                                                                                                                                                                                                                                                                                                                                                                                                                                                                                                               | Lighthouse Lab in Milton Keynes                                                                 | Wellcome Sanger Institute for the COVID-19 Genomics UK (COG-UK) Consortium                              | The Lighthouse Lab in Milton Keynes and Alex Alderton, Roberto Amato, Jeffrey Barrett, Sonia Goncalves, Ewan Harrison, David K. Jackson, Ian Johnston, Dominic Kwiatkowski, Cordelia Langford, John Sillitoe on behalf of the Wellcome Sanger Institute COVID-19 Surveillance Team                                                                                                                                                                                                                                                                                                                                                                                                                                                                                                                                                                                                                                                                                                                                                                                               |
| EPI_ISL_1700604, EPI_ISL_1700608                                                                                                                                                                                                                                                                                                                                                                                                                                                                                                              | Labo Analyses Med                                                                               | National Reference Center for Viruses of Respiratory Infections, Institut Pasteur, Paris                | Marion Barbet, Sylvie Behillil, Méline Bizard, Angela Brisebarre, Camille Capel, Vincent Enouf, Louise Lefrançois, Frédéric Lemoine, Christophe Malabat, Corinne Maufrais, Damien Mornico, Etienne Simon-Lorière, Maud Vanpeene, Sylvie Van der Werf, GréGoire Potiron                                                                                                                                                                                                                                                                                                                                                                                                                                                                                                                                                                                                                                                                                                                                                                                                           |
| EPI_ISL_1700737                                                                                                                                                                                                                                                                                                                                                                                                                                                                                                                               | Laboratorio Local de Itapeperica da Serra                                                       | Instituto Butantan / USP-Pirassununga                                                                   | Instituto Butantan: Dimas Tadeu Covas, Sandra Coccuzzo Sampaio, José Salvoatore Elias, José Salvatore Sampaio, Maria Carolina Elias, Vincent Louis Viala, Antonio Jorge Martins, Ricardo Haddad, Claudia Renata dos Santos Barros, Elaine Cristina Marquize, Raul Machado Neto, Debora Botequiu Moretti, Centro de Genômica Funcional da ESALQ: Luiz Lehmann Coutinho, Ricardo Augusto Brassaloti, Raquel de Lello Rocha Campos Cassano. NGS Soluções Genômicas: Pilar Drummond Sampaio Corrêa Mariani, FZEA-USP Pirassununga: Mirele Daiana Poleti, Jessica Cristina Chagas Lesbon, Elisângela Chicaroni Mattos, Heidge Fukumasa. USP-Botucatu: Rejane Maria Tommasini Grotto, Jayme A. Souza-Neto, Guilherme Targino Valente, Patricia Akemi Assato, Felipe Allan da Silva da Costa, Bianca Cechetto Carlos, Mendelics: Bibiana Santos, João Paulo Kitajima, Erika Freitas, David Schlesinger. Hemocentro Ribeirão Preto: Simone Kashima, Evandra Strazza Rodrigues, Svetoslav Nanev Slavov, Elaine Vieira dos Santos, Rafael dos Santos Bezerra, Luiz Carlos Junior de Alcant |
| EPI_ISL_1706122, EPI_ISL_1706200                                                                                                                                                                                                                                                                                                                                                                                                                                                                                                              | Maryland Genomics, Institute for Genome Sciences, University of Maryland School of Medicine     | Maryland Genomics, Institute for Genome Sciences, University of Maryland School of Medicine             | Tallon, Luke J; Sadzewicz, Lisa D; Humphys, Mike; Ott, Sandra; Roussey, Holly; Mehta, Aditya; Vavikolanu, Kranthi; Fraser, Claire M; Ravel, Jacques                                                                                                                                                                                                                                                                                                                                                                                                                                                                                                                                                                                                                                                                                                                                                                                                                                                                                                                              |
| EPI_ISL_1707521                                                                                                                                                                                                                                                                                                                                                                                                                                                                                                                               | NOVABIO DORDOGNE                                                                                | CNR Virus des Infections Respiratoires - France SUD                                                     | Antonin Bal, Gregory Destras, Gwendolynne Briffin, Hadrien Regue, Quentin Semanas, Martine Valette, Bruno Lina, Laurence Josset                                                                                                                                                                                                                                                                                                                                                                                                                                                                                                                                                                                                                                                                                                                                                                                                                                                                                                                                                  |
| EPI_ISL_1708650                                                                                                                                                                                                                                                                                                                                                                                                                                                                                                                               | Hospital                                                                                        | National Reference Center for Viruses of Respiratory Infections, Institut Pasteur, Paris                | Marion Barbet, Sylvie Behillil, Méline Bizard, Angela Brisebarre, Camille Capel, Vincent Enouf, Louise Lefrançois, Frédéric Lemoine, Christophe Malabat, Corinne Maufrais, Amaury Vayse, Etienne Simon-Lorière, Maud Vanpeene, Sylvie Van der Werf, Sandrine Castelain                                                                                                                                                                                                                                                                                                                                                                                                                                                                                                                                                                                                                                                                                                                                                                                                           |
| EPI_ISL_1709306, EPI_ISL_1709677, EPI_ISL_1709702, EPI_ISL_1709744, EPI_ISL_1709827, EPI_ISL_1709981                                                                                                                                                                                                                                                                                                                                                                                                                                          | MSHS Clinical Microbiology Laboratories                                                         | MSHS Pathogen Surveillance Program                                                                      | Ana S. Gonzalez-Reiche, Hala Alshammary, Mitchell J. Sullivan, Brianne Ciferri, Ajay Obla, Angela Amoako, Mahmood Awawda, Daniel Floda, Julia Matthews, Ashley Salimbangon, Levy Sominsky, Katherine Beach, Kayla Russo, Charles Gleason, Shelcie Fabre, Giulio Kleiner, Zenab Khan, Bremy Albuquerque, Adriana van de Guchte, Komal Srivastava, Matthew M. Hernandez, Jayeeta Dutta, Denise Jurczynsk, Nancy Francoeur, Betsaida Salom Melo, Irina Oussenko, Gintaras Deikus, Juan Soto, Shwetha Hara Sridhar, Ying-Chih Wang, Kathryn Twyman, Deena R. Altman, Robert Sebra, Adolfo Garcia-Sastre, Marta Luksza, Gopi Patel, Sarah Schaefer, Melissa Gitman, Michael D. Nowak, Alberto Paniz-Mondolfi, Emilia Mia Sordillo, Viviana Simon, Harm van Bakel                                                                                                                                                                                                                                                                                                                      |
| EPI_ISL_1712557                                                                                                                                                                                                                                                                                                                                                                                                                                                                                                                               | Innovative Genomics Institute, UC Berkeley                                                      | Innovative Genomics Institute, UC Berkeley                                                              | Stacia Wyman, Phil Frankino, John Boyle, Holly Gildea                                                                                                                                                                                                                                                                                                                                                                                                                                                                                                                                                                                                                                                                                                                                                                                                                                                                                                                                                                                                                            |
| EPI_ISL_1715168                                                                                                                                                                                                                                                                                                                                                                                                                                                                                                                               | Virology Laboratory, International Centre for Diarrhoeal Disease Research, Bangladesh (ICDDR,B) | Virology Laboratory, International Centre for Diarrhoeal Disease Research, Bangladesh (ICDDR,B)         | Mohammad Enayet Hossain, Mojinu Miah, Rashedul Hasan, Md. Mahfuzur Rahman, Mohammed Ziaur Rahman, Mustafizur Rahman                                                                                                                                                                                                                                                                                                                                                                                                                                                                                                                                                                                                                                                                                                                                                                                                                                                                                                                                                              |
| EPI_ISL_1716563                                                                                                                                                                                                                                                                                                                                                                                                                                                                                                                               | Arizona State Public Health Laboratory                                                          | Arizona State Public Health Laboratory                                                                  | Trung Huynh, Jessica Escobar, Katherine Fullerton, Nobuko Fukushima, Stacy White, Linda Getsinger, Victor Waddell                                                                                                                                                                                                                                                                                                                                                                                                                                                                                                                                                                                                                                                                                                                                                                                                                                                                                                                                                                |
| EPI_ISL_1716875                                                                                                                                                                                                                                                                                                                                                                                                                                                                                                                               | UCLA Clinical Micro Lab                                                                         | Los Angeles County PHL                                                                                  | P. Hemarajata et al.                                                                                                                                                                                                                                                                                                                                                                                                                                                                                                                                                                                                                                                                                                                                                                                                                                                                                                                                                                                                                                                             |
| EPI_ISL_1717025                                                                                                                                                                                                                                                                                                                                                                                                                                                                                                                               | Virology Laboratory, International Centre for Diarrhoeal Disease Research, Bangladesh (ICDDR,B) | Virology Laboratory, International Centre for Diarrhoeal Disease Research, Bangladesh (ICDDR,B)         | Mohammad Enayet Hossain, Mojinu Miah, Rashedul Hasan, Md. Mahfuzur Rahman, Mohammed Ziaur Rahman, Mustafizur Rahman                                                                                                                                                                                                                                                                                                                                                                                                                                                                                                                                                                                                                                                                                                                                                                                                                                                                                                                                                              |
| EPI_ISL_1717279, EPI_ISL_1717392, EPI_ISL_1717583, EPI_ISL_1717692, EPI_ISL_1717775, EPI_ISL_1717928, EPI_ISL_1717939, EPI_ISL_1718045, EPI_ISL_1718232                                                                                                                                                                                                                                                                                                                                                                                       | Pandemic Response Lab - NYC                                                                     | Pandemic Response Lab, R&D                                                                              | Henry Lee, Michael Hammerling, Melissa Hopkins, Cybill del Castillo, Shinyoung Clair Kang, William Ward, Pradeep Bugga, Sol Rey, Dylan Law, Katharine Nelson, Haiping Hao, Jon Laurent                                                                                                                                                                                                                                                                                                                                                                                                                                                                                                                                                                                                                                                                                                                                                                                                                                                                                           |
| EPI_ISL_1718931                                                                                                                                                                                                                                                                                                                                                                                                                                                                                                                               | Lighthouse Lab in Cambridge                                                                     | Wellcome Sanger Institute for the COVID-19 Genomics UK (COG-UK) Consortium                              | Rob Howes, The Lighthouse Lab in Cambridge and Alex Alderton, Roberto Amato, Jeffrey Barrett, Sonia Goncalves, Ewan Harrison, David K. Jackson, Ian Johnston, Dominic Kwiatkowski, Cordelia Langford, John Sillitoe on behalf of the Wellcome Sanger Institute COVID-19 Surveillance Team                                                                                                                                                                                                                                                                                                                                                                                                                                                                                                                                                                                                                                                                                                                                                                                        |
| EPI_ISL_1731096                                                                                                                                                                                                                                                                                                                                                                                                                                                                                                                               | National Virus Reference Laboratory                                                             | National Virus Reference Laboratory                                                                     | Zoe Yandle, Charlene Bennett, Gabriel Gonzalez, Michael Carr, Jonathan Dean, Cillian F De Gascun                                                                                                                                                                                                                                                                                                                                                                                                                                                                                                                                                                                                                                                                                                                                                                                                                                                                                                                                                                                 |
| EPI_ISL_1731136, EPI_ISL_1731152                                                                                                                                                                                                                                                                                                                                                                                                                                                                                                              | National Virus Reference Laboratory                                                             | National Virus Reference Laboratory                                                                     | Guerrino Macorì, Gabriel Gonzalez, Michael Carr, Zoe Yandle, Charlene Bennett, Jonathan Dean, Seamus Fanning, Cillian F De Gascun                                                                                                                                                                                                                                                                                                                                                                                                                                                                                                                                                                                                                                                                                                                                                                                                                                                                                                                                                |
| EPI_ISL_1731174, EPI_ISL_1731219, EPI_ISL_1731223, EPI_ISL_1731235, EPI_ISL_1731244, EPI_ISL_1731260, EPI_ISL_1731266, EPI_ISL_1731272, EPI_ISL_1731280, EPI_ISL_1731299, EPI_ISL_1731326, EPI_ISL_1731348                                                                                                                                                                                                                                                                                                                                    | National Virus Reference Laboratory                                                             | National Virus Reference Laboratory                                                                     | Zoe Yandle, Charlene Bennett, Gabriel Gonzalez, Michael Carr, Jonathan Dean, Cillian F De Gascun                                                                                                                                                                                                                                                                                                                                                                                                                                                                                                                                                                                                                                                                                                                                                                                                                                                                                                                                                                                 |
| EPI_ISL_1731567                                                                                                                                                                                                                                                                                                                                                                                                                                                                                                                               | MRCG at LSHTM Genomics lab                                                                      | MRCG at LSHTM Genomics lab                                                                              | Abdul Karim sesay, Abdoulie Kanteh, Jarra Manneh, Mariama Kujabi, Bakary Sanyang                                                                                                                                                                                                                                                                                                                                                                                                                                                                                                                                                                                                                                                                                                                                                                                                                                                                                                                                                                                                 |
| EPI_ISL_1732409                                                                                                                                                                                                                                                                                                                                                                                                                                                                                                                               | UPMC Clinical Microbiology Laboratory                                                           | Microbial Genome Sequencing Center; Microbial Genomic Epidemiology Laboratory, University of Pittsburgh | Lee H. Harrison, Jane W. Marsh, Marissa P. Griffith, Stephanie L. Mitchell, Vatsala R. Srinivasa, Kady D. Waggle, Daniel J. Snyder, Vaughn S. Cooper                                                                                                                                                                                                                                                                                                                                                                                                                                                                                                                                                                                                                                                                                                                                                                                                                                                                                                                             |
| EPI_ISL_1732567                                                                                                                                                                                                                                                                                                                                                                                                                                                                                                                               | Illinois Department of Public Health - Springfield Lab                                          | Illinois Department of Public Health - Springfield Lab                                                  | Bryan Sim, Gordon McCall                                                                                                                                                                                                                                                                                                                                                                                                                                                                                                                                                                                                                                                                                                                                                                                                                                                                                                                                                                                                                                                         |
| EPI_ISL_1733003                                                                                                                                                                                                                                                                                                                                                                                                                                                                                                                               | Baylor Scott & White-Temple                                                                     | Baylor Scott & White-Temple                                                                             | Ari Rao, Linden Morales, Kimberly Walker, Marcus Volz, Shelby Hendrickson                                                                                                                                                                                                                                                                                                                                                                                                                                                                                                                                                                                                                                                                                                                                                                                                                                                                                                                                                                                                        |
| EPI_ISL_1742910, EPI_ISL_1743004, EPI_ISL_1743005, EPI_ISL_1743072, EPI_ISL_1743120, EPI_ISL_1743138, EPI_ISL_1743142, EPI_ISL_1743150, EPI_ISL_1743156, EPI_ISL_1743160, EPI_ISL_1743161, EPI_ISL_1743162, EPI_ISL_1743163, EPI_ISL_1743165, EPI_ISL_1743195, EPI_ISL_1743200, EPI_ISL_1743266, EPI_ISL_1743291, EPI_ISL_1743390, EPI_ISL_1743402, EPI_ISL_1743403, EPI_ISL_1743479, EPI_ISL_1743481, EPI_ISL_1743483, EPI_ISL_1743493, EPI_ISL_1743503, EPI_ISL_1743515, EPI_ISL_1743558, EPI_ISL_1743565, EPI_ISL_1743578, EPI_ISL_1743586 | Public Health Ontario Laboratory                                                                | Public Health Ontario Laboratory                                                                        | Vanessa G Allen, Philip Banh, Yao Chen, Richard de Borja, Alireza Eshaghi, Nahuel Fittipaldi, Christine Frantz, Jonathan B Gubbay, Jennifer L Guthrie,                                                                                                                                                                                                                                                                                                                                                                                                                                                                                                                                                                                                                                                                                                                                                                                                                                                                                                                           |
| see above                                                                                                                                                                                                                                                                                                                                                                                                                                                                                                                                     | Public Health Ontario Laboratory                                                                | Public Health Ontario Laboratory                                                                        | Vanessa G Allen, Philip Banh, Yao Chen, Richard de Borja, Alireza Eshaghi, Nahuel Fittipaldi, Christine Frantz, Jonathan B Gubbay, Jennifer L Guthrie,                                                                                                                                                                                                                                                                                                                                                                                                                                                                                                                                                                                                                                                                                                                                                                                                                                                                                                                           |

|                                                                                                                       |                                                                                                          |                                                                                                           |                                                                                                                                                                                                                                                                                                                                                                                                                                 |
|-----------------------------------------------------------------------------------------------------------------------|----------------------------------------------------------------------------------------------------------|-----------------------------------------------------------------------------------------------------------|---------------------------------------------------------------------------------------------------------------------------------------------------------------------------------------------------------------------------------------------------------------------------------------------------------------------------------------------------------------------------------------------------------------------------------|
| EPI_ISL_1743608                                                                                                       | Arizona State University                                                                                 | Arizona State University                                                                                  | Lawrence Heisler, Esha Joshi, Michael Laszloffy, Aimin Li, Michael CY Li, Dean Maxwell, Sandeep Nagra, Samir N Patel, Jared Simpson, Karthikeyan Sivaraman, Ashleigh Sullivan, Yogi Sundaravadanam, Sarah Teatero, Andre Villegas, Matthew Watson, Sandra Zittermann                                                                                                                                                            |
| EPI_ISL_1744441                                                                                                       | University of Michigan Clinical Microbiology Laboratory                                                  | Lauring Lab, University of Michigan, Department of Microbiology and Immunology                            | Peter T. Skidmore, LaRinda A. Holland, Rabia Maqsood, Nicholas J. Mellor, Joy M. Blain, Valerie Harris, Joshua LaBaer, Vel Murugan, Efrim S. Lim Valesano                                                                                                                                                                                                                                                                       |
| EPI_ISL_1745172                                                                                                       | LHUB-ULB                                                                                                 | Labo Klinische Biologie, UZA                                                                              | Marie Le Mercier, Jasmine Coppens, Basil Britto Xavier, Christine Lammens, Veerle Matheeußen, Herman Goossens                                                                                                                                                                                                                                                                                                                   |
| EPI_ISL_1749737                                                                                                       | Viollier AG                                                                                              | Department of Biosystems Science and Engineering, ETH Zürich                                              | Chaoran Chen, Sarah Nadeau, Ivan Topolsky, Emmanouil Dermatzakis, Keith Harshman, Ioannis Xenarios, Henri Pegeot, Lorenzo Cerutti, Deborah Penet, Philipp Jablonski, Lara Fuhrmann, David Dreifuss, Katharina Jahn, Christiane Beckmann, Maurice Redondo, Olivier Kobel, Christoph Noppen, Sophie Seidel, Noemie Santamaria de Souza, Niko Beerenwinkel, Tanja Stadler                                                          |
| EPI_ISL_1750506                                                                                                       | Viollier AG                                                                                              | Department of Biosystems Science and Engineering, ETH Zürich                                              | Christian Beisel, Sarah Nadeau, Chaoran Chen, Ivan Topolsky, Philipp Jablonski, Lara Fuhrmann, David Dreifuss, Katharina Jahn, Rebecca Denes, Mirjam Feldkamp, Ina Nissen, Natascha Santacroce, Elodie Burcklen, Christiane Beckmann, Maurice Redondo, Olivier Kobel, Christoph Noppen, Sophie Seidel, Noemie Santamaria de Souza, Niko Beerenwinkel, Tanja Stadler                                                             |
| EPI_ISL_1758312                                                                                                       | Lighthouse Lab in Glasgow                                                                                | Wellcome Sanger Institute for the COVID-19 Genomics UK (COG-UK) Consortium                                | Harper VanSteenhouse, Yumi Kasai, David Gray, Carol Clugston, Anna Dominiczak and Alex Alderton, Roberto Amato, Jeffrey Barrett, Sonia Goncalves, Ewan Harrison, David K. Jackson, Ian Johnston, Dominic Kwiatkowski, Cordelia Langford, John Sillitoe on behalf of the Wellcome Sanger Institute COVID-19 Surveillance Team                                                                                                    |
| EPI_ISL_1759850                                                                                                       | Lighthouse Lab in Cambridge                                                                              | Wellcome Sanger Institute for the COVID-19 Genomics UK (COG-UK) Consortium                                | Rob Howes, The Lighthouse Lab in Cambridge and Alex Alderton, Roberto Amato, Jeffrey Barrett, Sonia Goncalves, Ewan Harrison, David K. Jackson, Ian Johnston, Dominic Kwiatkowski, Cordelia Langford, John Sillitoe on behalf of the Wellcome Sanger Institute COVID-19 Surveillance Team                                                                                                                                       |
| EPI_ISL_1760372                                                                                                       | Virginia Division of Consolidated Laboratory Services                                                    | Virginia Division of Consolidated Laboratory Services                                                     | Virginia DCLS                                                                                                                                                                                                                                                                                                                                                                                                                   |
| EPI_ISL_1760562, EPI_ISL_1760567, EPI_ISL_1760568, EPI_ISL_1760574, EPI_ISL_1760576                                   | TXDSHS                                                                                                   | TXDSHS                                                                                                    | Rashmi Tuladhar, Bonnie Oh, Jenny Zhang, Maliha Rahman, Mayela Pedrueza, Anita Pokharel, Lorraine Rodriguez, Myong Koag, Chun Wang, Rachel Lee, Grace Kubin                                                                                                                                                                                                                                                                     |
| EPI_ISL_1760620                                                                                                       | Clinical specimen                                                                                        | Centre de Recherche et de Formation en Infectiologie Guinée                                               | Alpha Cabinet KEITA, Haby DIALLO, Abdoul Karim SOUMAH, Abdoulaye TOURE, Thibaut Armel Cherif GNIMADI, Joel KOIVOGUI, Jean-louis MONEMOU, Moriba POVOGUI, Mamadou Saliou SOW, Mamadou Bhoeye KEITA, Penda Malhado DIALLO, Alimou CAMARA, Kaba KOUROUMA, Mandiou DIKITE, Mamadou Saliou BAH, Sakoba KEITA, Bouna Yatassaye, Christelle BUTEL, Laetitia SERRANO, Ahidjo AYOUBA, Eric DELAPORTE, Martine PEETERS                    |
| EPI_ISL_1761557, EPI_ISL_1761559                                                                                      | P.O.CARDARELLI                                                                                           | P.O.CARDARELLI                                                                                            | Scutellà M, Felice V, Niro G                                                                                                                                                                                                                                                                                                                                                                                                    |
| EPI_ISL_1764155                                                                                                       | LBM ALPHABIO, Marseille                                                                                  | LBM ALPHABIO, Marseille                                                                                   | Vincent GARCIA                                                                                                                                                                                                                                                                                                                                                                                                                  |
| EPI_ISL_1785274, EPI_ISL_1785314, EPI_ISL_1785317                                                                     | National Virus Reference Laboratory                                                                      | National Virus Reference Laboratory                                                                       | Zoe Yandle, Charlene Bennett, Gabriel Gonzalez, Michael Carr, Jonathan Dean, Cillian F De Gascun                                                                                                                                                                                                                                                                                                                                |
| EPI_ISL_1785347, EPI_ISL_1785355, EPI_ISL_1785371, EPI_ISL_1785398                                                    | National Virus Reference Laboratory                                                                      | National Virus Reference Laboratory                                                                       | Fiona Crispie, Calum Walsh, Matthew McCabe, Zoe Yandle, Charlene Bennet, Gabriel Gonzalez, Michael Carr, Jonathan Dean, Paul Cotter, Cillian F De Gascun                                                                                                                                                                                                                                                                        |
| EPI_ISL_1785510                                                                                                       | National Virus Reference Laboratory                                                                      | National Virus Reference Laboratory                                                                       | Zoe Yandle, Charlene Bennett, Gabriel Gonzalez, Michael Carr, Jonathan Dean, Cillian F De Gascun                                                                                                                                                                                                                                                                                                                                |
| EPI_ISL_1785791                                                                                                       | UW Virology Lab                                                                                          | UW Virology Lab                                                                                           | Pavitra Roychoudhury, Hong Xie, Lasata Shrestha, Tien V. Nguyen, Shah Mohamed Bakhsh, Michelle Lin, Noah R. Baker, Sean Ellis, Meei-Li Huang, Keith R Jerome, Alexander Greninger                                                                                                                                                                                                                                               |
| EPI_ISL_1786120                                                                                                       | Servicio de Microbiología, HRU de Málaga. Servicio Andaluz de Salud                                      | SeqCOVID-SPAIN consortium/IBV(CSIC)                                                                       | Inmaculada de Toro Peinado, M <sup>a</sup> Concepción Mediavilla Gradolph, Begoña Palop Borrás, Mercedes Pérez Ruiz and SeqCOVID-SPAIN consortium                                                                                                                                                                                                                                                                               |
| EPI_ISL_1786465, EPI_ISL_1786466, EPI_ISL_1786467, EPI_ISL_1786468, EPI_ISL_1786470                                   | Virology, Universitätsklinikum des Saarlandes                                                            | Epigenetics, Saarland University                                                                          | Kathrin Kattler, Stefan Lohse, Sascha Tierling, Thorsten Pfuhl, Sigrun Smola, Jörn Walter                                                                                                                                                                                                                                                                                                                                       |
| EPI_ISL_1788672                                                                                                       | LABORATOIRE CERBALLIANCE PLT VILLON                                                                      | CNR Virus des Infections Respiratoires - France SUD                                                       | Antonin Bal, Gregory Destras, Gwendolynne Burfin, Hadrien Regue, Quentin Semanas, Martine Valette, Bruno Lina, Laurence Josset                                                                                                                                                                                                                                                                                                  |
| EPI_ISL_1789182, EPI_ISL_1789187                                                                                      | Illinois Department of Public Health - Springfield Lab                                                   | Illinois Department of Public Health - Springfield Lab                                                    | Bryan Sim, Gordon McCall                                                                                                                                                                                                                                                                                                                                                                                                        |
| EPI_ISL_1789972                                                                                                       | NYU Langone Health                                                                                       | Departments of Pathology and Medicine, New York University School of Medicine                             | Adriana Heguy, Dacia Dimartino, Emily Guzman, Christian Marier, Peter Meyn, Sitharam Ramaswami, Gael Westby, Paul Zappile, Yutong Zhang, Paolo Cotzia, Guiqing Wang                                                                                                                                                                                                                                                             |
| EPI_ISL_1790127                                                                                                       | Centre Pasteur du Cameroun                                                                               | Institut Pasteur de Dakar                                                                                 | Njoum Richard, Diagne Moussa Moïse, Dia Ndongou, Diallo Amadou, Sankhe Safietou, Diop Mamadou, Ndiaye Ndock, Loucoubar Cheikh, Carniel Elisabeth, Faye Ousmane, Sall Amadou Alpha                                                                                                                                                                                                                                               |
| EPI_ISL_1790899, EPI_ISL_1790910                                                                                      | Lighthouse Lab in Milton Keynes                                                                          | Wellcome Sanger Institute for the COVID-19 Genomics UK (COG-UK) Consortium                                | The Lighthouse Lab in Milton Keynes and Alex Alderton, Roberto Amato, Jeffrey Barrett, Sonia Goncalves, Ewan Harrison, David K. Jackson, Ian Johnston, Dominic Kwiatkowski, Cordelia Langford, John Sillitoe on behalf of the Wellcome Sanger Institute COVID-19 Surveillance Team                                                                                                                                              |
| EPI_ISL_1791160, EPI_ISL_1791191, EPI_ISL_1791196, EPI_ISL_1791213, EPI_ISL_1791233, EPI_ISL_1791234                  | National Virus Reference Laboratory                                                                      | National Virus Reference Laboratory                                                                       | Zoe Yandle, Charlene Bennett, Gabriel Gonzalez, Michael Carr, Jonathan Dean, Cillian F De Gascun                                                                                                                                                                                                                                                                                                                                |
| EPI_ISL_1791244, EPI_ISL_1791248, EPI_ISL_1791257, EPI_ISL_1791259, EPI_ISL_1791269, EPI_ISL_1791270, EPI_ISL_1791306 | National Virus Reference Laboratory                                                                      | National Virus Reference Laboratory                                                                       | Fiona Crispie, Calum Walsh, Matthew McCabe, Zoe Yandle, Charlene Bennet, Gabriel Gonzalez, Michael Carr, Jonathan Dean, Paul Cotter, Cillian F De Gascun                                                                                                                                                                                                                                                                        |
| EPI_ISL_1791387                                                                                                       | Missouri State Public Health Laboratory                                                                  | Missouri State Public Health Laboratory                                                                   | Matthew Sinn, Joshua Barry, Ashley New                                                                                                                                                                                                                                                                                                                                                                                          |
| EPI_ISL_1792386                                                                                                       | Dutch COVID-19 response team                                                                             | National Institute for Public Health and the Environment (RIVM)                                           | Adam Meijer, Harry Vennema, Dirk Eggink, Jeroen Cremer, Sharon van den Brink, Bas van der Veer, AnneMarie van den Brandt, Lisa Wijsman, Kim Freriks, Ryanne Jaarsma, Eunice Then, Lynn Aarts, Sanne Cremer, Melissa van Tuij, Robert Kohl, Linda van de Nes, Sjoerd Kuiling, James Groot, Florian Zwagemaker, Dennis Schmitz, Annelies Kroneman, Karim Hajji, Chantal Reusken, on behalf of the national COVID-19 response team |
| EPI_ISL_1793782                                                                                                       | SYNLAB                                                                                                   | GIGA Medical Genomics                                                                                     | Keith Durkin, Maria Artesi, Sébastien Bontems, Raphaël Boreux, Bouchra Boujemla, Nathalie Renotte, Cécile Meex, Pierrette Melin, Marie-Pierre Hayette, Vincent Bours                                                                                                                                                                                                                                                            |
| EPI_ISL_1793789                                                                                                       | Virology Laboratory, International Centre for Diarrhoeal Disease Research, Bangladesh (ICDDR,B)          | Virology Laboratory, International Centre for Diarrhoeal Disease Research, Bangladesh (ICDDR,B)           | Mohammad Enayet Hossain, Moju Miah, Rashedul Hasan, Md. Mahfuzur Rahman, Mohammed Ziaur Rahman, Mustafizur Rahman                                                                                                                                                                                                                                                                                                               |
| EPI_ISL_1794017, EPI_ISL_1794030, EPI_ISL_1794303, EPI_ISL_1794401                                                    | Wisconsin State Laboratory of Hygiene Communicable Disease Division                                      | Wisconsin State Laboratory of Hygiene Communicable Disease Division                                       | Kelsey R. Florek, Abigail C. Shockey, Alicia J. Mooney, Sara Wagner                                                                                                                                                                                                                                                                                                                                                             |
| EPI_ISL_1794625                                                                                                       | San Diego County Public Health Laboratory                                                                | Andersen lab at Scripps Research                                                                          | SEARCH Alliance San Diego with Tracy Basler, Jovan Shephard, Brett Austin                                                                                                                                                                                                                                                                                                                                                       |
| EPI_ISL_1794705, EPI_ISL_1794749                                                                                      | Sharp HealthCare Laboratory                                                                              | Andersen lab at Scripps Research                                                                          | SEARCH Alliance San Diego with Aaron Harding, Jacquelyn Berumen, Cathy Woerle, Liam McGinnis, Art Mendoza, Omid Bakhtar                                                                                                                                                                                                                                                                                                         |
| EPI_ISL_1794844                                                                                                       | Scripps Medical Laboratory                                                                               | Andersen lab at Scripps Research                                                                          | SEARCH Alliance San Diego with Michael Quigley, Ellen Stefanski, Ian Mchardy                                                                                                                                                                                                                                                                                                                                                    |
| EPI_ISL_1794905                                                                                                       | Sharp HealthCare Laboratory                                                                              | Andersen lab at Scripps Research                                                                          | SEARCH Alliance San Diego with Aaron Harding, Jacquelyn Berumen, Cathy Woerle, Liam McGinnis, Art Mendoza, Omid Bakhtar                                                                                                                                                                                                                                                                                                         |
| EPI_ISL_1795957                                                                                                       | Department of Public Health Microbiology Ljubljana, National Laboratory for Health, Environment and Food | Department for Public Health Microbiology Ljubljana, National Laboratory for Health, Environment and Food | Tom Koritnik, José Gonçalves, Martin Boslij, Katarina Proscenc, Natasja Berginc, Metka Paragi                                                                                                                                                                                                                                                                                                                                   |

|                                                                                                                                                                          |                                                                                                                            |                                                                                                                                                  |                                                                                                                                                                                                                                                                                                                                                                                                                                                                                                                                                                                                                                                                                                                                                                                                                                                                                                                                                                                                                                                   |
|--------------------------------------------------------------------------------------------------------------------------------------------------------------------------|----------------------------------------------------------------------------------------------------------------------------|--------------------------------------------------------------------------------------------------------------------------------------------------|---------------------------------------------------------------------------------------------------------------------------------------------------------------------------------------------------------------------------------------------------------------------------------------------------------------------------------------------------------------------------------------------------------------------------------------------------------------------------------------------------------------------------------------------------------------------------------------------------------------------------------------------------------------------------------------------------------------------------------------------------------------------------------------------------------------------------------------------------------------------------------------------------------------------------------------------------------------------------------------------------------------------------------------------------|
| EPI_ISL_1797455                                                                                                                                                          | CHWAPI - SITE NOTRE DAME                                                                                                   | Institut de Pathologie et Genetique (IPG)                                                                                                        | Pascale Hilbert, Jérémie Gras                                                                                                                                                                                                                                                                                                                                                                                                                                                                                                                                                                                                                                                                                                                                                                                                                                                                                                                                                                                                                     |
| EPI_ISL_1797819, EPI_ISL_1799071                                                                                                                                         | Laboratoire Biolim/FSS/UL                                                                                                  | Unité Mixte Internationale TransVIHMI (UMI 233 IRD - U1175 INSERM - Université de Montpellier) IRD (Institut de recherche pour le développement) | Mounerou SALOU, Christelle BUTEL, Wembo A. HALATOKO, Amivi EHLAN, Abia A. KONOU, Issaka Maman, Syntyche DEVATCHAGNI, Adodo SADJI, Kokou TEGUENI, Koku AGBODEKA, Sidonie A.M.KAGNISSODE, Akoélé SILIADIN, Alassane OURO-MEDEL, Messanh DOUFFAN, Déléma MABA, Sika DOSSIM, Améyo DORKENOO, Mireille PRINCE-DAVID, Anoumou DAGNRA, Laetitia SERRANO, Ahidjo AYOUBA, Eric DELAPORTE, Martine PEETERS                                                                                                                                                                                                                                                                                                                                                                                                                                                                                                                                                                                                                                                  |
| EPI_ISL_1801906, EPI_ISL_1801909, EPI_ISL_1801969, EPI_ISL_1802348                                                                                                       | Laboratory Corporation of America                                                                                          | Centers for Disease Control and Prevention Division of Viral Diseases, Pathogen Discovery                                                        | Dakota Howard, Dhvani Batra, Peter W. Cook, Kara Moser, Adrian Paskey, Jason Caravas, Benjamin Rambo-Martin, Shatavia Morrison, Christopher Gulvick, Scott Sammons, Yvette Onoarumhi, Darlene Wagner, Matthew Schriener, Minoo Agarwal, Eyad Almasri, Debbie Boles, Ayla Burns, Nuthawin Charoensri, Oren Cohen, Susan Countryman, Mary Ann Cristobal, Bobbi Croy, Suzanne Dale, Hrushikesh Deshmukh, Amanda Douglas, Vincent Drouillon, Marcia Eisenberg, Howard Engler, Rama Ghatti, Prashant Gupta, Susan Hicks, Jake Humphrey, Lax Iyer, Manoj Jain, Mohan Kolli, Brian Krueger, Tom Kuphal, Stanley Letovsky, Michael Levandoski, Craig Lukasik, Jonathan Meltzer, Brian Norvell, Mindy Nye, Scott Parker, Christos Petropoulos, John Pruitt, Steven Ragan, Scott Ryan, Mike Sapeta, Jana Schroth, Suresh Babu Selvaraju, Goran Stevovic, Amanda Suchanek, Andrea Throop, Lyndon Tilson, Thomas Urban, Joe Voshell, Kimberly Wagner, Jonathan Williams, Mary Williamson, Qian Zeng, Tricia Zwiefelhofer, Clinton R. Paden, Duncan MacCannell |
| EPI_ISL_1805384, EPI_ISL_1805385, EPI_ISL_1805396                                                                                                                        | New Mexico Department of Health Scientific Laboratory                                                                      | New Mexico Department of Health Scientific Laboratory                                                                                            | Ellie Johnson, D'elra Malone, Jennifer Benoit, Ratheesh Rajan, Linda Salazar, Anastacia Griego-Fisher                                                                                                                                                                                                                                                                                                                                                                                                                                                                                                                                                                                                                                                                                                                                                                                                                                                                                                                                             |
| EPI_ISL_1806228, EPI_ISL_1806412, EPI_ISL_1806455, EPI_ISL_1806674                                                                                                       | Lighthouse Lab in Milton Keynes                                                                                            | Wellcome Sanger Institute for the COVID-19 Genomics UK (COG-UK) Consortium                                                                       | The Lighthouse Lab in Milton Keynes and Alex Alderton, Roberto Amato, Jeffrey Barrett, Sonia Goncalves, Ewan Harrison, David K. Jackson, Ian Johnston, Dominic Kwiatkowski, Cordelia Langford, John Sillitoe on behalf of the Wellcome Sanger Institute COVID-19 Surveillance Team                                                                                                                                                                                                                                                                                                                                                                                                                                                                                                                                                                                                                                                                                                                                                                |
| EPI_ISL_1811584                                                                                                                                                          | MD PHL                                                                                                                     | MD PHL                                                                                                                                           | Maryland Department of Health Laboratories Administration                                                                                                                                                                                                                                                                                                                                                                                                                                                                                                                                                                                                                                                                                                                                                                                                                                                                                                                                                                                         |
| EPI_ISL_1817932, EPI_ISL_1817939, EPI_ISL_1817941, EPI_ISL_1817946, EPI_ISL_1817955, EPI_ISL_1817988                                                                     | Institute for Infectious Diseases                                                                                          | Institute for Infectious Diseases                                                                                                                | Alban Ramette, Stefan Neuwenschwander, Christian Baumann, Miguel A Terrazos Miani, Cora Sägesser, Pascal Bittel, Peter Keller, Franziska Suter-Riniker, Stephen L Leib                                                                                                                                                                                                                                                                                                                                                                                                                                                                                                                                                                                                                                                                                                                                                                                                                                                                            |
| EPI_ISL_1821323, EPI_ISL_1821388, EPI_ISL_1821389, EPI_ISL_1821390, EPI_ISL_1821391                                                                                      | County of San Luis Obispo Public Health Laboratory                                                                         | Chan-Zuckerberg Biohub                                                                                                                           | CZB Cliahub Consortium                                                                                                                                                                                                                                                                                                                                                                                                                                                                                                                                                                                                                                                                                                                                                                                                                                                                                                                                                                                                                            |
| EPI_ISL_1821392                                                                                                                                                          | Santa Clara County Public Health Laboratory                                                                                | Chan-Zuckerberg Biohub                                                                                                                           | CZB Cliahub Consortium                                                                                                                                                                                                                                                                                                                                                                                                                                                                                                                                                                                                                                                                                                                                                                                                                                                                                                                                                                                                                            |
| EPI_ISL_1821394                                                                                                                                                          | County of San Luis Obispo Public Health Laboratory                                                                         | Chan-Zuckerberg Biohub                                                                                                                           | CZB Cliahub Consortium                                                                                                                                                                                                                                                                                                                                                                                                                                                                                                                                                                                                                                                                                                                                                                                                                                                                                                                                                                                                                            |
| EPI_ISL_1821473                                                                                                                                                          | Labo Analyses Med                                                                                                          | National Reference Center for Viruses of Respiratory Infections, Institut Pasteur, Paris                                                         | Marion Barbet, Sylvie Behillil, Méline Bizard, Angela Brisebarre, Camille Capel, Vincent Enouf, Louise Lefrançois, Frédéric Lemoine, Christophe Malabat, Corinne Maufrais, Emmanuelle Permal, Etienne Simon-Lorière, Maud Vanpeene, Sylvie Van der Werf, Franck Ennouchi                                                                                                                                                                                                                                                                                                                                                                                                                                                                                                                                                                                                                                                                                                                                                                          |
| EPI_ISL_1821688, EPI_ISL_1821689                                                                                                                                         | UTMG Pathology LLC                                                                                                         | UTMG Pathology LLC                                                                                                                               | Parasakthy Kumaravelu, Timothy Hodge, Kelsey Matande, Tiara Hymon, Vickie Baselski, Abdallah Azouz                                                                                                                                                                                                                                                                                                                                                                                                                                                                                                                                                                                                                                                                                                                                                                                                                                                                                                                                                |
| EPI_ISL_1822042, EPI_ISL_1822061                                                                                                                                         | University of Wisconsin-Madison AIDS Vaccine Research Laboratories                                                         | University of Wisconsin-Madison AIDS Vaccine Research Laboratories                                                                               | Gage Moreno, Katarina Braun, et al. AIDS Vaccine Research Laboratories                                                                                                                                                                                                                                                                                                                                                                                                                                                                                                                                                                                                                                                                                                                                                                                                                                                                                                                                                                            |
| EPI_ISL_1822098                                                                                                                                                          | Virginia Division of Consolidated Laboratory Services                                                                      | Virginia Division of Consolidated Laboratory Services                                                                                            | Virginia DCLS                                                                                                                                                                                                                                                                                                                                                                                                                                                                                                                                                                                                                                                                                                                                                                                                                                                                                                                                                                                                                                     |
| EPI_ISL_1824644, EPI_ISL_1824673, EPI_ISL_1824678                                                                                                                        | Institute for Infectious Diseases, University of Bern, Switzerland                                                         | Institute for Infectious Diseases, University of Bern, Switzerland                                                                               | Alban Ramette, Stefan Neuwenschwander, Christian Baumann, Miguel A Terrazos Miani, Cora Sägesser, Pascal Bittel, Peter Keller, Franziska Suter-Riniker, Stephen L Leib                                                                                                                                                                                                                                                                                                                                                                                                                                                                                                                                                                                                                                                                                                                                                                                                                                                                            |
| EPI_ISL_1825684                                                                                                                                                          | COVID-19 Detection Lab, Chattogram Veterinary and Animal Sciences University                                               | Genomic Research Lab, Bangladesh Council of Scientific and Industrial Research                                                                   | Goutam Buddha Das, Tridip Das, Tanvir Ahmad Nizami, Eaftekar Ahmed Rana, Md. Sirazul Islam, Pronesh Dutta, Sharmin Chowdhury, Md. Morshed Hasan Sarkar, Md. Salim Khan, Paritosh Kumar Biswas                                                                                                                                                                                                                                                                                                                                                                                                                                                                                                                                                                                                                                                                                                                                                                                                                                                     |
| EPI_ISL_1825855                                                                                                                                                          | Illinois Department of Public Health - Springfield Lab                                                                     | Illinois Department of Public Health - Springfield Lab                                                                                           | Bryan Sim, Gordon McCall                                                                                                                                                                                                                                                                                                                                                                                                                                                                                                                                                                                                                                                                                                                                                                                                                                                                                                                                                                                                                          |
| EPI_ISL_1827318                                                                                                                                                          | Lab voor klinische biologie                                                                                                | Lab voor klinische biologie                                                                                                                      | Marija Janevska, Hannelore Hamerlinck, Bruno Verhasselt                                                                                                                                                                                                                                                                                                                                                                                                                                                                                                                                                                                                                                                                                                                                                                                                                                                                                                                                                                                           |
| EPI_ISL_1827662, EPI_ISL_1827694                                                                                                                                         | Virology Department, Victoria Hospital, Plaine-Wilhems, Mauritius                                                          | National Institute for Communicable Diseases of the National Health Laboratory Service                                                           | Ramuth M, Manraj SS, Sonoo J, Baboo SB, Amoako DG, Mohale T, Ntuli N, Mahlungu B, Allam M, Ismail A, Bhiman JN                                                                                                                                                                                                                                                                                                                                                                                                                                                                                                                                                                                                                                                                                                                                                                                                                                                                                                                                    |
| EPI_ISL_1827976, EPI_ISL_1828022, EPI_ISL_1828143, EPI_ISL_1828228, EPI_ISL_1828300, EPI_ISL_1828304, EPI_ISL_1828351, EPI_ISL_1828508, EPI_ISL_1828545, EPI_ISL_1828574 | Pandemic Response Lab - NYC                                                                                                | Pandemic Response Lab, R&D                                                                                                                       | Henry Lee, Michael Hammerling, Melissa Hopkins, Cybill del Castillo, Shinyoung Clair Kang, William Ward, Pradeep Bugga, Sol Rey, Dylan Law, Katharine Nelson, Haiping Hao, Jon Laurent                                                                                                                                                                                                                                                                                                                                                                                                                                                                                                                                                                                                                                                                                                                                                                                                                                                            |
| EPI_ISL_1828709, EPI_ISL_1828719, EPI_ISL_1828720                                                                                                                        | National Institute of Public Health                                                                                        | State Veterinary Institute Prague                                                                                                                | Nagy,A;Jirincova,H;Suri,T;Trnka,D;Vecerova J                                                                                                                                                                                                                                                                                                                                                                                                                                                                                                                                                                                                                                                                                                                                                                                                                                                                                                                                                                                                      |
| EPI_ISL_1828782                                                                                                                                                          | Virology Laboratory, International Centre for Diarrhoeal Disease Research, Bangladesh (ICDDR,B)                            | Virology Laboratory, International Centre for Diarrhoeal Disease Research, Bangladesh (ICDDR,B)                                                  | Mohammad Enayet Hossain, Moju Miah, Rashedul Hasan, Md. Mahfuzur Rahman, Mohammed Ziaur Rahman, Mustafizur Rahman                                                                                                                                                                                                                                                                                                                                                                                                                                                                                                                                                                                                                                                                                                                                                                                                                                                                                                                                 |
| EPI_ISL_1829217, EPI_ISL_1829446, EPI_ISL_1829450                                                                                                                        | Lighthouse Lab in Milton Keynes                                                                                            | Wellcome Sanger Institute for the COVID-19 Genomics UK (COG-UK) Consortium                                                                       | The Lighthouse Lab in Milton Keynes and Alex Alderton, Roberto Amato, Jeffrey Barrett, Sonia Goncalves, Ewan Harrison, David K. Jackson, Ian Johnston, Dominic Kwiatkowski, Cordelia Langford, John Sillitoe on behalf of the Wellcome Sanger Institute COVID-19 Surveillance Team                                                                                                                                                                                                                                                                                                                                                                                                                                                                                                                                                                                                                                                                                                                                                                |
| EPI_ISL_1829891, EPI_ISL_1829990                                                                                                                                         | Randox Laboratories                                                                                                        | Wellcome Sanger Institute for the COVID-19 Genomics UK (COG-UK) Consortium                                                                       | Randox Laboratories and Alex Alderton, Roberto Amato, Jeffrey Barrett, Sonia Goncalves, Ewan Harrison, David K. Jackson, Ian Johnston, Dominic Kwiatkowski, Cordelia Langford, John Sillitoe on behalf of the Wellcome Sanger Institute COVID-19 Surveillance Team                                                                                                                                                                                                                                                                                                                                                                                                                                                                                                                                                                                                                                                                                                                                                                                |
| EPI_ISL_1830167, EPI_ISL_1830573                                                                                                                                         | Lighthouse Lab in Alderley Park                                                                                            | Wellcome Sanger Institute for the COVID-19 Genomics UK (COG-UK) Consortium                                                                       | Jacquelyn Wynn, Mairead Hyland, The Lighthouse Lab in Alderley Park and Alex Alderton, Roberto Amato, Jeffrey Barrett, Sonia Goncalves, Ewan Harrison, David K. Jackson, Ian Johnston, Dominic Kwiatkowski, Cordelia Langford, John Sillitoe on behalf of the Wellcome Sanger Institute COVID-19 Surveillance Team                                                                                                                                                                                                                                                                                                                                                                                                                                                                                                                                                                                                                                                                                                                                |
| EPI_ISL_1831337                                                                                                                                                          | Health Services Laboratories                                                                                               | Wellcome Sanger Institute for the COVID-19 Genomics UK (COG-UK) Consortium                                                                       | Health Services Laboratories and Alex Alderton, Roberto Amato, Jeffrey Barrett, Sonia Goncalves, Ewan Harrison, David K. Jackson, Ian Johnston, Dominic Kwiatkowski, Cordelia Langford, John Sillitoe on behalf of the Wellcome Sanger Institute COVID-19 Surveillance Team                                                                                                                                                                                                                                                                                                                                                                                                                                                                                                                                                                                                                                                                                                                                                                       |
| EPI_ISL_1831489                                                                                                                                                          | Lighthouse Lab in Cambridge                                                                                                | Wellcome Sanger Institute for the COVID-19 Genomics UK (COG-UK) Consortium                                                                       | Rob Howes, The Lighthouse Lab in Cambridge and Alex Alderton, Roberto Amato, Jeffrey Barrett, Sonia Goncalves, Ewan Harrison, David K. Jackson, Ian Johnston, Dominic Kwiatkowski, Cordelia Langford, John Sillitoe on behalf of the Wellcome Sanger Institute COVID-19 Surveillance Team                                                                                                                                                                                                                                                                                                                                                                                                                                                                                                                                                                                                                                                                                                                                                         |
| EPI_ISL_1833283, EPI_ISL_1833286                                                                                                                                         | Centre for Enzyme Innovation, University of Portsmouth / Translational Research Laboratory, Portsmouth Hospitals NHS Trust | COVID-19 Genomics UK (COG-UK) Consortium                                                                                                         | Angela Beckett, Salman Goudarzi, Christopher Fearn, Kate Cook, Katie Loveson, Sharon Glaysheer, Scott Elliott, Samuel Robson                                                                                                                                                                                                                                                                                                                                                                                                                                                                                                                                                                                                                                                                                                                                                                                                                                                                                                                      |
| EPI_ISL_1838844                                                                                                                                                          | CSIR-Centre for Cellular and Molecular Biology                                                                             | CSIR-Centre for Cellular and Molecular Biology-INSACOG                                                                                           | Payel Mukherjee, Lamuk Zaveri, Tulasi Nagabandi, Ara Sreenivas, Shreekanth Verma, Amreshwar Vodapalli, Blessy B John, Viswagithe S L, B Himasri, Valli Nagalakshmi Undamatla, Onkar Kulkarni, Sofia Banu, Archana Bharadwaj Siva, Sharath Chandra Thota, Karthik Bharadwaj Tallapaka, Rakesh K Mishra, Divya Tej Sowpati                                                                                                                                                                                                                                                                                                                                                                                                                                                                                                                                                                                                                                                                                                                          |
| EPI_ISL_1840802, EPI_ISL_1840850, EPI_ISL_1840854                                                                                                                        | Labor Berlin Charite Vivantes GmbH / Institut für Virologie                                                                | Charite Universitätsmedizin Berlin, Institut für Virologie/Labor Berlin                                                                          | Peter Menzel, Christine Stephan, Rolf Schwarzer, Victor M Corman, Barbara Muhlemann, Terry Jones, Christian Drosten                                                                                                                                                                                                                                                                                                                                                                                                                                                                                                                                                                                                                                                                                                                                                                                                                                                                                                                               |
| EPI_ISL_1841403                                                                                                                                                          | Platform BIS UZA/UAntwerpen                                                                                                | Labo Klinische Biologie, UZA                                                                                                                     | Marie Le Mercier, Jasmine Coppens, Basil Britto Xavier, Christine Lammens, Veerle Matheeußen, Herman Goossens                                                                                                                                                                                                                                                                                                                                                                                                                                                                                                                                                                                                                                                                                                                                                                                                                                                                                                                                     |
| EPI_ISL_1841831, EPI_ISL_1842648, EPI_ISL_1842744                                                                                                                        | Department of Virology and Immunology, University of Helsinki and Helsinki University Hospital, Huslab Finland             | Department of Virology, Faculty of Medicine, University of Helsinki, Helsinki, Finland                                                           | Teemu Smura, Ravi Kant, Phuoc Truong, Hussein Alburkat, Hannimari Kallio-Kokko, Jenni Virtanen, Maija Suvanto, Essi Korhonen, Sari Hannula, Harri Kangas, Hanna Liimatainen, Satu Kerkela, Hanna Jarva, Maija Lappalainen, Pekka Ellonen, Olli Vapalahti                                                                                                                                                                                                                                                                                                                                                                                                                                                                                                                                                                                                                                                                                                                                                                                          |
| EPI_ISL_1849415                                                                                                                                                          | MVZ Labor Krone GbR                                                                                                        | Robert Koch Institute                                                                                                                            | unknown                                                                                                                                                                                                                                                                                                                                                                                                                                                                                                                                                                                                                                                                                                                                                                                                                                                                                                                                                                                                                                           |
| EPI_ISL_1851842                                                                                                                                                          | SIESP CHIETI - DRIVE IN CHIETI                                                                                             | Istituto Zooprofilattico Sperimentale dell'Abruzzo e Molise "G.                                                                                  | Lorusso A, Maracchi M, Di Domenico M, Ancora M, Curini V, Di Lollo Valeria, Mangone I, Rinaldi A, Delli Compagni E, Scialabba S, Caporale M, Di                                                                                                                                                                                                                                                                                                                                                                                                                                                                                                                                                                                                                                                                                                                                                                                                                                                                                                   |

|                                                                                                                                                                                                                                                                                                                                                                                                                                                                                                                                                                                                                                                                                                                                                                                                                                                                                                                                                                                                                                                                                                                                                                                                                                      |                                                                                                                | Caporale*                                                                                                      | Pasquale A, Cammà C, Puglia I, Calistri P, Savini G                                                                                                                                                                                                                                                                                                                                                                                                                     |
|--------------------------------------------------------------------------------------------------------------------------------------------------------------------------------------------------------------------------------------------------------------------------------------------------------------------------------------------------------------------------------------------------------------------------------------------------------------------------------------------------------------------------------------------------------------------------------------------------------------------------------------------------------------------------------------------------------------------------------------------------------------------------------------------------------------------------------------------------------------------------------------------------------------------------------------------------------------------------------------------------------------------------------------------------------------------------------------------------------------------------------------------------------------------------------------------------------------------------------------|----------------------------------------------------------------------------------------------------------------|----------------------------------------------------------------------------------------------------------------|-------------------------------------------------------------------------------------------------------------------------------------------------------------------------------------------------------------------------------------------------------------------------------------------------------------------------------------------------------------------------------------------------------------------------------------------------------------------------|
| EPI_ISL_1854158, EPI_ISL_1854159, EPI_ISL_1854160                                                                                                                                                                                                                                                                                                                                                                                                                                                                                                                                                                                                                                                                                                                                                                                                                                                                                                                                                                                                                                                                                                                                                                                    | Instituto Nacional de Saude (INSA) and Institute of Biomedicine (iBiMed), Universidade de Aveiro               | Instituto Nacional de Saude (INSA) and Institute of Biomedicine (iBiMed), Universidade de Aveiro               | Borges et al                                                                                                                                                                                                                                                                                                                                                                                                                                                            |
| EPI_ISL_1854902                                                                                                                                                                                                                                                                                                                                                                                                                                                                                                                                                                                                                                                                                                                                                                                                                                                                                                                                                                                                                                                                                                                                                                                                                      | UNC-CH COVID Surveillance Lab                                                                                  | Jeremy Wang                                                                                                    | Jeremy Wang, Alexander Rubinsteyn, Melissa Miller, Corbin Jones, Amy James Loftis, Amir Barzin, Susan Fiscus                                                                                                                                                                                                                                                                                                                                                            |
| EPI_ISL_1854947                                                                                                                                                                                                                                                                                                                                                                                                                                                                                                                                                                                                                                                                                                                                                                                                                                                                                                                                                                                                                                                                                                                                                                                                                      | Clinical Molecular Microbiology Laboratory, UNC Hospitals                                                      | Jeremy Wang                                                                                                    | Jeremy Wang, Alexander Rubinsteyn, Colleen Rice, Jason Smedberg, Shawn Hawken, Melissa Miller, Corbin Jones, Robert Hagan                                                                                                                                                                                                                                                                                                                                               |
| EPI_ISL_1855232                                                                                                                                                                                                                                                                                                                                                                                                                                                                                                                                                                                                                                                                                                                                                                                                                                                                                                                                                                                                                                                                                                                                                                                                                      | URMC LABS                                                                                                      | Wadsworth Center, New York State Department of Health                                                          | Kirsten St. George, Daryl M. Lamson, Alexis Russell, Matthew Shudt, Melissa A Leisner, Jonathan Plitnick, Catharine Prussing, Navjot Singh, John Kelly, Erasmus Schneider, Erica Lasek-Nesselquist                                                                                                                                                                                                                                                                      |
| EPI_ISL_1855365                                                                                                                                                                                                                                                                                                                                                                                                                                                                                                                                                                                                                                                                                                                                                                                                                                                                                                                                                                                                                                                                                                                                                                                                                      | University of Wisconsin-Madison AIDS Vaccine Research Laboratories                                             | University of Wisconsin-Madison AIDS Vaccine Research Laboratories                                             | Gage Moreno, Katarina Braun, et al. AIDS Vaccine Research Laboratories                                                                                                                                                                                                                                                                                                                                                                                                  |
| EPI_ISL_1855865, EPI_ISL_1855899, EPI_ISL_1855903, EPI_ISL_1855906                                                                                                                                                                                                                                                                                                                                                                                                                                                                                                                                                                                                                                                                                                                                                                                                                                                                                                                                                                                                                                                                                                                                                                   | Baylor Scott & White-Temple                                                                                    | Baylor Scott & White-Temple                                                                                    | Ari Rao, Linden Morales, Kimberly Walker, Marcus Volz, Shelby Hendrickson                                                                                                                                                                                                                                                                                                                                                                                               |
| EPI_ISL_1856928, EPI_ISL_1856962, EPI_ISL_1856969, EPI_ISL_1856970, EPI_ISL_1856971, EPI_ISL_1856975, EPI_ISL_1856978                                                                                                                                                                                                                                                                                                                                                                                                                                                                                                                                                                                                                                                                                                                                                                                                                                                                                                                                                                                                                                                                                                                | Texas Department of State Health Services (TXDSHS)                                                             | Texas Department of State Health Services (TXDSHS)                                                             | Rashmi Tuladhar, Bonnie Oh, Jenny Zhang, Maliha Rahmah, Mayela Pedrueza, Anita Pokharel, Lorraine Rodriguez, Myong Koag, Chun Wang, Rachel Lee, Grace Kubin                                                                                                                                                                                                                                                                                                             |
| EPI_ISL_1857524                                                                                                                                                                                                                                                                                                                                                                                                                                                                                                                                                                                                                                                                                                                                                                                                                                                                                                                                                                                                                                                                                                                                                                                                                      | Minnesota Department of Health, Public Health Laboratory                                                       | Minnesota Department of Health, Public Health Laboratory                                                       | Alexandra Lorentz, Jacob Garfin, Matt Plumb, and Xiong Wang                                                                                                                                                                                                                                                                                                                                                                                                             |
| EPI_ISL_1857643                                                                                                                                                                                                                                                                                                                                                                                                                                                                                                                                                                                                                                                                                                                                                                                                                                                                                                                                                                                                                                                                                                                                                                                                                      | Randox Laboratories                                                                                            | Wellcome Sanger Institute for the COVID-19 Genomics UK (COG-UK) Consortium                                     | Randox Laboratories and Alex Alderton, Roberto Amato, Jeffrey Barrett, Sonia Goncalves, Ewan Harrison, David K. Jackson, Ian Johnston, Dominic Kwiatkowski, Cordelia Langford, John Sillitoe on behalf of the Wellcome Sanger Institute COVID-19 Surveillance Team                                                                                                                                                                                                      |
| EPI_ISL_1879410, EPI_ISL_1882321, EPI_ISL_1883173, EPI_ISL_1883475                                                                                                                                                                                                                                                                                                                                                                                                                                                                                                                                                                                                                                                                                                                                                                                                                                                                                                                                                                                                                                                                                                                                                                   | Department of Virus and Microbiological Special Diagnostics, Statens Serum Institut, Copenhagen, Denmark       | Aalborg University                                                                                             | Danish Covid-19 Genome Consortium                                                                                                                                                                                                                                                                                                                                                                                                                                       |
| EPI_ISL_1885989                                                                                                                                                                                                                                                                                                                                                                                                                                                                                                                                                                                                                                                                                                                                                                                                                                                                                                                                                                                                                                                                                                                                                                                                                      | Labor Berlin Charite Vivantes GmbH / Institut für Virologie                                                    | Charite Universitätsmedizin Berlin, Institut für Virologie/Labor Berlin                                        | Peter Menzel, Christine Stephan, Rolf Schwarzer, Victor M Corman, Barbara Muhlemann, Terry Jones, Christian Drosten                                                                                                                                                                                                                                                                                                                                                     |
| EPI_ISL_1891064, EPI_ISL_1891156, EPI_ISL_1891192, EPI_ISL_1891194, EPI_ISL_1891213, EPI_ISL_1891244, EPI_ISL_1891339, EPI_ISL_1891398                                                                                                                                                                                                                                                                                                                                                                                                                                                                                                                                                                                                                                                                                                                                                                                                                                                                                                                                                                                                                                                                                               | National Virus Reference Laboratory                                                                            | National Virus Reference Laboratory                                                                            | Zoe Yandle, Charlene Bennett, Gabriel Gonzalez, Michael Carr, Jonathan Dean, Cillian F De Gascun                                                                                                                                                                                                                                                                                                                                                                        |
| EPI_ISL_1892661                                                                                                                                                                                                                                                                                                                                                                                                                                                                                                                                                                                                                                                                                                                                                                                                                                                                                                                                                                                                                                                                                                                                                                                                                      | Department of Virus and Microbiological Special Diagnostics, Statens Serum Institut, Copenhagen, Denmark       | Aalborg University                                                                                             | Danish Covid-19 Genome Consortium                                                                                                                                                                                                                                                                                                                                                                                                                                       |
| EPI_ISL_1896703, EPI_ISL_1896716, EPI_ISL_1896758, EPI_ISL_1896760, EPI_ISL_1896764, EPI_ISL_1896774, EPI_ISL_1896804, EPI_ISL_1896816, EPI_ISL_1896817, EPI_ISL_1896818, EPI_ISL_1896819, EPI_ISL_1896820, EPI_ISL_1896821, EPI_ISL_1896822, EPI_ISL_1896843, EPI_ISL_1896844, EPI_ISL_1896845, EPI_ISL_1896846, EPI_ISL_1896847, EPI_ISL_1896848, EPI_ISL_1896849, EPI_ISL_1896850, EPI_ISL_1896851, EPI_ISL_1896855, EPI_ISL_1896858, EPI_ISL_1896859, EPI_ISL_1896866, EPI_ISL_1896867, EPI_ISL_1896876, EPI_ISL_1896890, EPI_ISL_1896909, EPI_ISL_1896917, EPI_ISL_1896920, EPI_ISL_1896921, EPI_ISL_1896923, EPI_ISL_1896925, EPI_ISL_1896935, EPI_ISL_1896953, EPI_ISL_1896955, EPI_ISL_1897010, EPI_ISL_1897013, EPI_ISL_1897015, EPI_ISL_1897039, EPI_ISL_1897087, EPI_ISL_1897109, EPI_ISL_1897122, EPI_ISL_1897130, EPI_ISL_1897132, EPI_ISL_1897134, EPI_ISL_1897143, EPI_ISL_1897155, EPI_ISL_1897160, EPI_ISL_1897166, EPI_ISL_1897170, EPI_ISL_1897186, EPI_ISL_1897198, EPI_ISL_1897201, EPI_ISL_1897202, EPI_ISL_1897207, EPI_ISL_1897226, EPI_ISL_1897236, EPI_ISL_1897237, EPI_ISL_1897238, EPI_ISL_1897239, EPI_ISL_1897240, EPI_ISL_1897245, EPI_ISL_1897246, EPI_ISL_1897247, EPI_ISL_1897249, EPI_ISL_1897250 |                                                                                                                |                                                                                                                |                                                                                                                                                                                                                                                                                                                                                                                                                                                                         |
| see above                                                                                                                                                                                                                                                                                                                                                                                                                                                                                                                                                                                                                                                                                                                                                                                                                                                                                                                                                                                                                                                                                                                                                                                                                            | Public Health Ontario Laboratory                                                                               | Public Health Ontario Laboratory                                                                               | Vanessa G Allen, Philip Banh, Yao Chen, Richard de Borja, Alireza Eshaghi, Nahuel Fittipaldi, Christine Frantz, Jonathan B Gubbay, Jennifer L Guthrie, Lawrence Heiser, Esha Joshi, Michael Laszloffy, Aimin Li, Michael CY Li, Dean Maxwell, Sandeep Nagra, Samir N Patel, Jared Simpson, Karthikeyan Sivaraman, Ashleigh Sullivan, Yogi Sundaravadanam, Sarah Teatero, Andre Villegas, Matthew Watson, Sandra Zittermann                                              |
| EPI_ISL_1897633                                                                                                                                                                                                                                                                                                                                                                                                                                                                                                                                                                                                                                                                                                                                                                                                                                                                                                                                                                                                                                                                                                                                                                                                                      | National Public Health Laboratory, National Centre for Infectious Diseases                                     | National Public Health Laboratory, National Centre for Infectious Diseases                                     | Tze Minn Mak, Zhenyang Zhou, Grace Jie Yin Ngan, Royce Ang, Lin Cui, Raymond Tzer Pin Lin                                                                                                                                                                                                                                                                                                                                                                               |
| EPI_ISL_1901935, EPI_ISL_1902091, EPI_ISL_1902108, EPI_ISL_1902384, EPI_ISL_1902465, EPI_ISL_1902554                                                                                                                                                                                                                                                                                                                                                                                                                                                                                                                                                                                                                                                                                                                                                                                                                                                                                                                                                                                                                                                                                                                                 | Swedish national genomic surveillance program of SARS-CoV-2                                                    | The Public Health Agency of Sweden                                                                             | Maximilian Riess, Maria Lind Karlberg, Alma Brolund, Swedish national genomic surveillance program of SARS-CoV-2                                                                                                                                                                                                                                                                                                                                                        |
| EPI_ISL_1904636, EPI_ISL_1904644, EPI_ISL_1904653, EPI_ISL_1904659, EPI_ISL_1904699, EPI_ISL_1904722, EPI_ISL_1904760, EPI_ISL_1904773, EPI_ISL_1904842                                                                                                                                                                                                                                                                                                                                                                                                                                                                                                                                                                                                                                                                                                                                                                                                                                                                                                                                                                                                                                                                              | National Virus Reference Laboratory                                                                            | National Virus Reference Laboratory                                                                            | Zoe Yandle, Charlene Bennett, Gabriel Gonzalez, Michael Carr, Jonathan Dean, Cillian F De Gascun                                                                                                                                                                                                                                                                                                                                                                        |
| EPI_ISL_1909221, EPI_ISL_1909227, EPI_ISL_1909232, EPI_ISL_1909234                                                                                                                                                                                                                                                                                                                                                                                                                                                                                                                                                                                                                                                                                                                                                                                                                                                                                                                                                                                                                                                                                                                                                                   | Laboratory of Clinical Microbiology, Virology and Bioemergencies, ASST Fatebenefratelli Sacco - Sacco Hospital | Laboratory of Clinical Microbiology, Virology and Bioemergencies, ASST Fatebenefratelli Sacco - Sacco Hospital | Valeria Micheli, Alessandro Mancon, Alberto Rizzo, Fiorenza Bracchitta, Luca Rizzuto, Maria Rita Gismondo                                                                                                                                                                                                                                                                                                                                                               |
| EPI_ISL_1909682                                                                                                                                                                                                                                                                                                                                                                                                                                                                                                                                                                                                                                                                                                                                                                                                                                                                                                                                                                                                                                                                                                                                                                                                                      | Sonora Quest Laboratories                                                                                      | TGen North                                                                                                     | *Jolene Bowers, Heather Centner, Chris French, Hayley Yaglom, Ashlyn Pfeiffer, Darrin Lemmer, Dave Engelthaler, The Arizona COVID Genomics Union (ACGU)*                                                                                                                                                                                                                                                                                                                |
| EPI_ISL_1911633                                                                                                                                                                                                                                                                                                                                                                                                                                                                                                                                                                                                                                                                                                                                                                                                                                                                                                                                                                                                                                                                                                                                                                                                                      | Universitätsspital Zürich                                                                                      | Institute of Medical Virology                                                                                  | Verena Kufner, Gabriela Ziltener, Maryam Zaheri, Stefan Schmutz, Annette Audigz, Maria Grÿnberg, Kevin Steiner, Jon Huder, Cyril Shah, Riccarda Capaul, Guido Bloemberg, Jÿrg Bšni, Michael Huber, Alexandra Trkola                                                                                                                                                                                                                                                     |
| EPI_ISL_1911756, EPI_ISL_1911778, EPI_ISL_1911779, EPI_ISL_1911780, EPI_ISL_1911781, EPI_ISL_1911789, EPI_ISL_1911790, EPI_ISL_1911791, EPI_ISL_1911792                                                                                                                                                                                                                                                                                                                                                                                                                                                                                                                                                                                                                                                                                                                                                                                                                                                                                                                                                                                                                                                                              | Ministry of Health Turkey                                                                                      | Ministry of Health Turkey                                                                                      | Fatma Bayrakdar, Yasemin Cosgun, Suleyman Yalcin, Gulay Korukluoglu                                                                                                                                                                                                                                                                                                                                                                                                     |
| EPI_ISL_1911907, EPI_ISL_1911922, EPI_ISL_1911934, EPI_ISL_1911937                                                                                                                                                                                                                                                                                                                                                                                                                                                                                                                                                                                                                                                                                                                                                                                                                                                                                                                                                                                                                                                                                                                                                                   | Baylor Scott & White-Temple                                                                                    | Baylor Scott & White-Temple                                                                                    | Ari Rao, Linden Morales, Kimberly Walker, Marcus Volz, Shelby Hendrickson                                                                                                                                                                                                                                                                                                                                                                                               |
| EPI_ISL_1912130                                                                                                                                                                                                                                                                                                                                                                                                                                                                                                                                                                                                                                                                                                                                                                                                                                                                                                                                                                                                                                                                                                                                                                                                                      | Lighthouse Lab in Milton Keynes                                                                                | Wellcome Sanger Institute for the COVID-19 Genomics UK (COG-UK) Consortium                                     | The Lighthouse Lab in Milton Keynes and Alex Alderton, Roberto Amato, Jeffrey Barrett, Sonia Goncalves, Ewan Harrison, David K. Jackson, Ian Johnston, Dominic Kwiatkowski, Cordelia Langford, John Sillitoe on behalf of the Wellcome Sanger Institute COVID-19 Surveillance Team                                                                                                                                                                                      |
| EPI_ISL_1912337                                                                                                                                                                                                                                                                                                                                                                                                                                                                                                                                                                                                                                                                                                                                                                                                                                                                                                                                                                                                                                                                                                                                                                                                                      | Lighthouse Lab in Cambridge                                                                                    | Wellcome Sanger Institute for the COVID-19 Genomics UK (COG-UK) Consortium                                     | Rob Howes, The Lighthouse Lab in Cambridge and Alex Alderton, Roberto Amato, Jeffrey Barrett, Sonia Goncalves, Ewan Harrison, David K. Jackson, Ian Johnston, Dominic Kwiatkowski, Cordelia Langford, John Sillitoe on behalf of the Wellcome Sanger Institute COVID-19 Surveillance Team                                                                                                                                                                               |
| EPI_ISL_1913004                                                                                                                                                                                                                                                                                                                                                                                                                                                                                                                                                                                                                                                                                                                                                                                                                                                                                                                                                                                                                                                                                                                                                                                                                      | Montana Public Health Laboratory                                                                               | Montana Public Health Laboratory                                                                               | Joy Ritter, Michelle Mozer, Carrie Biskupiak, Deborah Gibson                                                                                                                                                                                                                                                                                                                                                                                                            |
| EPI_ISL_1913078, EPI_ISL_1913080                                                                                                                                                                                                                                                                                                                                                                                                                                                                                                                                                                                                                                                                                                                                                                                                                                                                                                                                                                                                                                                                                                                                                                                                     | Centre de Recherches Médicales de Lambaréné (CERMEL)                                                           | Centre de Recherches Médicales de Lambaréné (CERMEL)                                                           | Gédéon Prince Manouana, Anicet Mouly Matoumba, Michel Ngonga Dikongo, Georgetin Nguema Ondo, Rodrigue Bikangui, Samira Zoa Assoumou, Srinivas reddy Pallerla, Jean Bernard Lekana-Douki, Joël-Fleury Djoba Siawaya, Steffen Borrmann, Thirumalaisamy P. Velavan, Bertrand Lell and Ayola Akim Adegnika                                                                                                                                                                  |
| EPI_ISL_1914120                                                                                                                                                                                                                                                                                                                                                                                                                                                                                                                                                                                                                                                                                                                                                                                                                                                                                                                                                                                                                                                                                                                                                                                                                      | Viollier AG                                                                                                    | Department of Biosystems Science and Engineering, ETH Zurich                                                   | Chaoran Chen, Sarah Nadeau, Catharine Aquino, Ivan Topolsky, Philipp Jablonski, Lara Fuhrmann, David Dreifuss, Katharina Jahn, Andrea Cabral de Gouvea, Maria Domenica Moccia, Simon Gruter, Timothy Sykes, Lennart Opitz, Griffin White, Laura Neff, Doris Popovic, Andrea Patrignani, Jay Tracy, Ralph Schlapbach, Christiane Beckmann, Maurice Redondo, Olivier Kobel, Christoph Noppen, Sophie Seidel, Noemie Santamaria de Souza, Niko Beerenwinkel, Tanja Stadler |
| EPI_ISL_1914121                                                                                                                                                                                                                                                                                                                                                                                                                                                                                                                                                                                                                                                                                                                                                                                                                                                                                                                                                                                                                                                                                                                                                                                                                      | Viollier AG                                                                                                    | Department of Biosystems Science and Engineering, ETH                                                          | Christian Beisel, Sarah Nadeau, Chaoran Chen, Ivan Topolsky, Philipp Jablonski, Lara Fuhrmann, David Dreifuss, Katharina Jahn, Rebecca Denes, Mirjam                                                                                                                                                                                                                                                                                                                    |

|                                                                                                                                                                                                                                                                                                                                                    |                                                                                                                            |                                                                                                                                                             |                                                                                                                                                                                                                                                                                                                                                                                                                                                                          |
|----------------------------------------------------------------------------------------------------------------------------------------------------------------------------------------------------------------------------------------------------------------------------------------------------------------------------------------------------|----------------------------------------------------------------------------------------------------------------------------|-------------------------------------------------------------------------------------------------------------------------------------------------------------|--------------------------------------------------------------------------------------------------------------------------------------------------------------------------------------------------------------------------------------------------------------------------------------------------------------------------------------------------------------------------------------------------------------------------------------------------------------------------|
|                                                                                                                                                                                                                                                                                                                                                    |                                                                                                                            | Zurich                                                                                                                                                      | Feldkamp, Ina Nissen, Natascha Santacroce, Elodie Burcklen, Christiane Beckmann, Maurice Redondo, Olivier Kobel, Christoph Noppen, Sophie Seidel, Noemie Santamaria de Souza, Niko Beerenwinkel, Tanja Stadler                                                                                                                                                                                                                                                           |
| EPI_ISL_1914122, EPI_ISL_1914123                                                                                                                                                                                                                                                                                                                   | Viollier AG                                                                                                                | Department of Biosystems Science and Engineering, ETH Zurich                                                                                                | Chaoran Chen, Sarah Nadeau, Ivan Topolsky, Emmanouil Dermitzakis, Keith Harshman, Ioannis Xenarios, Henri Pegeot, Lorenzo Cerutti, Deborah Penet, Philipp Jablonski, Lara Fuhrmann, David Dreifuss, Katharina Jahn, Christiane Beckmann, Maurice Redondo, Olivier Kobel, Christoph Noppen, Sophie Seidel, Noemie Santamaria de Souza, Niko Beerenwinkel, Tanja Stadler                                                                                                   |
| EPI_ISL_1914124, EPI_ISL_1914125                                                                                                                                                                                                                                                                                                                   | Viollier AG                                                                                                                | Department of Biosystems Science and Engineering, ETH Zurich                                                                                                | Chaoran Chen, Sarah Nadeau, Catharine Aquino, Ivan Topolsky, Philipp Jablonski, Lara Fuhrmann, David Dreifuss, Katharina Jahn, Andreia Cabral de Gouvea, Maria Domenica Moccia, Simon Gruter, Timothy Sykes, Lennart Opitz, Griffin White, Grace Neff, Doris Popovic, Andrea Patrignani, Jay Tracy, Ralph Schlappach, Christiane Beckmann, Maurice Redondo, Olivier Kobel, Christoph Noppen, Sophie Seidel, Noemie Santamaria de Souza, Niko Beerenwinkel, Tanja Stadler |
| EPI_ISL_1915164, EPI_ISL_1915168, EPI_ISL_1915169                                                                                                                                                                                                                                                                                                  | Labo Analyses Med                                                                                                          | National Reference Center for Viruses of Respiratory Infections, Institut Pasteur, Paris                                                                    | Marion Barbet, Sylvie Behillil, Méline Bizard, Angela Brisebarre, Camille Capel, Vincent Enouf, Louise Lefrançois, Frédéric Lemoine, Christophe Malabat, Corinne Maufrais, Emmanuelle Permal, Etienne Simon-Lorière, Maud Vanpeene, Sylvie Van der Werf, Florent Tomasi                                                                                                                                                                                                  |
| EPI_ISL_1915225, EPI_ISL_1915245                                                                                                                                                                                                                                                                                                                   | Diagnostyka. Laboratoria Medyczne.                                                                                         | 1. ViroGenetics - BSL3 Laboratory of Virology, Maopolska Centre of Biotechnology, Jagiellonian University; 2. genXone SA, Research & Development Laboratory | Mazur-Panaszuk,N., Nowicki G, Gromowski,T., Drwaska-Matelska N, Grabowski J, Brylak A, Gidlewicz A, Szeszko K, Ykulski M, Krych L, Kowalski,M., Wydmanski W., Szulc,P., Januszczak S, Labaj,P.P., Kaszuba M, Pycr,K.                                                                                                                                                                                                                                                     |
| EPI_ISL_1915690, EPI_ISL_1915691, EPI_ISL_1915692, EPI_ISL_1915693, EPI_ISL_1915694, EPI_ISL_1915695, EPI_ISL_1915696                                                                                                                                                                                                                              | National Virus Reference Laboratory                                                                                        | National Virus Reference Laboratory                                                                                                                         | Guerrino Macori, Gabriel Gonzalez, Michael Carr, Zoe Yandle, Charlene Bennett, Jonathan Dean, Seamus Fanning, Cillian F De Gascun                                                                                                                                                                                                                                                                                                                                        |
| EPI_ISL_1915786, EPI_ISL_1915787, EPI_ISL_1915789, EPI_ISL_1915792                                                                                                                                                                                                                                                                                 | EHA Clinics                                                                                                                | National Reference Laboratory, Nigeria Centre for Disease Control                                                                                           | Dr Ndodo Nnaemeka, Olusola Anuoluwapo Akanbi, Chimaobi Chukwu, Dr Omoare Adesuyi, Grace Esebanmen, Anthony Ahumibe, Catherine Okoi, Naidoo Dhamari, Nwando Mba, Dr Chikwe Ihekweazu                                                                                                                                                                                                                                                                                      |
| EPI_ISL_1916530                                                                                                                                                                                                                                                                                                                                    | Institute for Infectious Diseases, University of Bern, Switzerland                                                         | Institute for Infectious Diseases, University of Bern, Switzerland                                                                                          | Stefan Neuenchwander, Christian Baumann, Miguel A Terrazos Miani, Cora Sägesser, Pascal Bittel, Peter Keller, Franziska Suter-Riniker, Stephen L Leib, Alban Ramette                                                                                                                                                                                                                                                                                                     |
| EPI_ISL_1916612, EPI_ISL_1916655, EPI_ISL_1916793, EPI_ISL_1917134                                                                                                                                                                                                                                                                                 | BioneXt Lab                                                                                                                | Laboratoire national de sante, Microbiology, Microbial Genomics Platform                                                                                    | Anke Wienecke-Baldacchino, Catherine Ragimbeau, Jessica Tapp, Fatu Djabi, Lise Pignon, Raoul Salmon, Thibault Ferrandon, Tamir Abdelrahman                                                                                                                                                                                                                                                                                                                               |
| EPI_ISL_1917350                                                                                                                                                                                                                                                                                                                                    | Hospital Center Emile Mayrisch                                                                                             | Laboratoire national de sante, Microbiology, Microbial Genomics Platform                                                                                    | Anke Wienecke-Baldacchino, Catherine Ragimbeau, Jessica Tapp, Fatu Djabi, Lise Pignon, Raoul Salmon, Cynthia Oxacelay, Tamir Abdelrahman                                                                                                                                                                                                                                                                                                                                 |
| EPI_ISL_1917588, EPI_ISL_1917626, EPI_ISL_1917627, EPI_ISL_1917759, EPI_ISL_1917864                                                                                                                                                                                                                                                                | Laboratoires d'analyses medicales - Ketterthill                                                                            | Laboratoire national de sante, Microbiology, Microbial Genomics Platform                                                                                    | Anke Wienecke-Baldacchino, Catherine Ragimbeau, Jessica Tapp, Fatu Djabi, Lise Pignon, Raoul Salmon, Serge Vedy, Caroline Scheiber, Tamir Abdelrahman                                                                                                                                                                                                                                                                                                                    |
| EPI_ISL_1920603, EPI_ISL_1920617, EPI_ISL_1920618                                                                                                                                                                                                                                                                                                  | Department of Hygiene, Epidemiology and Medical Statistics, Medical School, National and Kapodistrian University of Athens | Central Public Health Laboratory, National Public Health Organization                                                                                       | Gkikas Magiorkinis et al                                                                                                                                                                                                                                                                                                                                                                                                                                                 |
| EPI_ISL_1920686, EPI_ISL_1920728, EPI_ISL_1920732, EPI_ISL_1920734, EPI_ISL_1920735, EPI_ISL_1920742, EPI_ISL_1920761, EPI_ISL_1920770, EPI_ISL_1920777, EPI_ISL_1920786, EPI_ISL_1920788, EPI_ISL_1920795, EPI_ISL_1920797, EPI_ISL_1920801, EPI_ISL_1920803                                                                                      | see above                                                                                                                  | Central Public Health Laboratory, National Public Health Organization                                                                                       | Kyriaki Tryfinopoulou, Grigoris Spanakos, Olga Pappa, Kleon Karadimas et al                                                                                                                                                                                                                                                                                                                                                                                              |
| EPI_ISL_1921443                                                                                                                                                                                                                                                                                                                                    | Randex Laboratories                                                                                                        | Wellcome Sanger Institute for the COVID-19 Genomics UK (COG-UK) Consortium                                                                                  | Randex Laboratories and Alex Alderton, Roberto Amato, Jeffrey Barrett, Sonia Goncalves, Ewan Harrison, David K. Jackson, Ian Johnston, Dominic Kwiatkowski, Cordelia Langford, John Sillitoe on behalf of the Wellcome Sanger Institute COVID-19 Surveillance Team                                                                                                                                                                                                       |
| EPI_ISL_1921499, EPI_ISL_1921518, EPI_ISL_1921520, EPI_ISL_1921524, EPI_ISL_1921728                                                                                                                                                                                                                                                                | Lighthouse Lab in Milton Keynes                                                                                            | Wellcome Sanger Institute for the COVID-19 Genomics UK (COG-UK) Consortium                                                                                  | The Lighthouse Lab in Milton Keynes and Alex Alderton, Roberto Amato, Jeffrey Barrett, Sonia Goncalves, Ewan Harrison, David K. Jackson, Ian Johnston, Dominic Kwiatkowski, Cordelia Langford, John Sillitoe on behalf of the Wellcome Sanger Institute COVID-19 Surveillance Team                                                                                                                                                                                       |
| EPI_ISL_1921789                                                                                                                                                                                                                                                                                                                                    | UniversitätsSpital Zürich 061                                                                                              | Institute of Medical Virology                                                                                                                               | Daniel Ehrsam, Isabel Stürmer, Catharine Aquino, Joel Wirz, Weihong Qi, Hubert Rehrauer, Verena Kufner, Gabriela Ziltener, Maryam Zaheri, Stefan Schmutz, Annette Audigé, Maria Grünberg, Kevin Steiner, Jon Huder, Cyril Shah, Riccarda Capaul, Guido Bloembergen, Jürg Böni, Michael Huber, Alexandra Trkola                                                                                                                                                           |
| EPI_ISL_1921970, EPI_ISL_1921990                                                                                                                                                                                                                                                                                                                   | Illinois Department of Public Health                                                                                       | Gagnon Lab, Southern Illinois University                                                                                                                    | Keith Gagnon                                                                                                                                                                                                                                                                                                                                                                                                                                                             |
| EPI_ISL_1922112                                                                                                                                                                                                                                                                                                                                    | Ministry of Health Turkey                                                                                                  | Ministry of Health Turkey                                                                                                                                   | Fatma Bayraktar, Yasemin Cosgun, Suleyman Yalcin, Gulay Korukluoglu                                                                                                                                                                                                                                                                                                                                                                                                      |
| EPI_ISL_1922704                                                                                                                                                                                                                                                                                                                                    | Clinical Reference Laboratory                                                                                              | Kansas Health and Environmental Lab                                                                                                                         | Mike Grose, Jonathan Barnell, Ben Olsen, and Phil Adam                                                                                                                                                                                                                                                                                                                                                                                                                   |
| EPI_ISL_1927218                                                                                                                                                                                                                                                                                                                                    | SARS-CoV-2 testing team, National Institute of Infectious Diseases                                                         | Pathogen Genomics Center, National Institute of Infectious Diseases                                                                                         | Tsuyoshi Sekizuka, Kentaro Itokawa, Rina Tanaka, Masanori Hashino, Nozomu Hanaoka, Masumichi Saito, Naomi Nojiri, Hazuka Y Furihata, Sana Uchikoba, Tsuguto Fujimoto, Makoto Kuroda                                                                                                                                                                                                                                                                                      |
| EPI_ISL_1927220                                                                                                                                                                                                                                                                                                                                    | SARS-CoV-2 testing team, National Institute of Infectious Diseases                                                         | Pathogen Genomics Center, National Institute of Infectious Diseases                                                                                         | Tsuyoshi Sekizuka, Kentaro Itokawa, Rina Tanaka, Masanori Hashino, Hidemasa Izumiya, Sunao Iyoda, Shouji Yamamoto, Masatomo Morita, Ken-ichi Lee, Nobuo Koizumi, Makoto Kuroda                                                                                                                                                                                                                                                                                           |
| EPI_ISL_1935336                                                                                                                                                                                                                                                                                                                                    | CHU TOULOUSE                                                                                                               | CNR Virus des Infections Respiratoires - France SUD                                                                                                         | Antonin Bal, Gregory Destras, Gwendolynne Burfin, Hadrien Regue, Quentin Semanas, Martine Valette, Bruno Lina, Laurence Josset                                                                                                                                                                                                                                                                                                                                           |
| EPI_ISL_1935337                                                                                                                                                                                                                                                                                                                                    | NOVABIO DORDOGNE                                                                                                           | CNR Virus des Infections Respiratoires - France SUD                                                                                                         | Antonin Bal, Gregory Destras, Gwendolynne Burfin, Hadrien Regue, Quentin Semanas, Martine Valette, Bruno Lina, Laurence Josset                                                                                                                                                                                                                                                                                                                                           |
| EPI_ISL_1935394                                                                                                                                                                                                                                                                                                                                    | CH PERIGUEUX                                                                                                               | CNR Virus des Infections Respiratoires - France SUD                                                                                                         | Antonin Bal, Gregory Destras, Gwendolynne Burfin, Hadrien Regue, Quentin Semanas, Martine Valette, Bruno Lina, Laurence Josset                                                                                                                                                                                                                                                                                                                                           |
| EPI_ISL_1935421, EPI_ISL_1935422                                                                                                                                                                                                                                                                                                                   | NOVABIO DORDOGNE                                                                                                           | CNR Virus des Infections Respiratoires - France SUD                                                                                                         | Antonin Bal, Gregory Destras, Gwendolynne Burfin, Hadrien Regue, Quentin Semanas, Martine Valette, Bruno Lina, Laurence Josset                                                                                                                                                                                                                                                                                                                                           |
| EPI_ISL_1935500                                                                                                                                                                                                                                                                                                                                    | Minnesota Department of Health, Public Health Laboratory                                                                   | Minnesota Department of Health, Public Health Laboratory                                                                                                    | Alexandra Lorentz, Jacob Garfin, Matt Plumb, and Xiong Wang                                                                                                                                                                                                                                                                                                                                                                                                              |
| EPI_ISL_1935549, EPI_ISL_1935550, EPI_ISL_1935551, EPI_ISL_1935552                                                                                                                                                                                                                                                                                 | Institute of Microbiology and Immunology, Faculty of Medicine, University of Ljubljana                                     | Institute of Microbiology and Immunology, Faculty of Medicine, University of Ljubljana                                                                      | Alen Sulji, Samo Zakotnik, Tomaž Mark Zorec, Matic Brvar, Doroteja Vljaj, Andraž Celar, Dominica Šturm, Patricija Pozvek, Špela Pleh, Miša Korva, Mario Poljak, Tatjana Avši - Županc                                                                                                                                                                                                                                                                                    |
| EPI_ISL_1935598, EPI_ISL_1935599                                                                                                                                                                                                                                                                                                                   | Cliniques universitaires Saint-Luc                                                                                         | UCLouvain/IREC/MBLG                                                                                                                                         | Jean Ruelle, Eleonore Ngyuvula, Benoit Kabamba Mukadi                                                                                                                                                                                                                                                                                                                                                                                                                    |
| EPI_ISL_1936147, EPI_ISL_1936177, EPI_ISL_1936178                                                                                                                                                                                                                                                                                                  | MD PHL                                                                                                                     | MD PHL                                                                                                                                                      | Maryland Department of Health Laboratories Administration                                                                                                                                                                                                                                                                                                                                                                                                                |
| EPI_ISL_1937036, EPI_ISL_1937114, EPI_ISL_1937117, EPI_ISL_1937131, EPI_ISL_1937132, EPI_ISL_1937134, EPI_ISL_1937143, EPI_ISL_1937144, EPI_ISL_1937150, EPI_ISL_1937221, EPI_ISL_1937363, EPI_ISL_1937386, EPI_ISL_1937387, EPI_ISL_1937390, EPI_ISL_1937391, EPI_ISL_1937393, EPI_ISL_1937412, EPI_ISL_1937414, EPI_ISL_1937415, EPI_ISL_1937429 | see above                                                                                                                  | Fulgent Genetics                                                                                                                                            | Harry Gao, Mickey Li, John Gao, Joseph Fierro, Benafsh Sapra, Becky Tsai, Yan Meng, Doreen Ng, James Xie                                                                                                                                                                                                                                                                                                                                                                 |
| EPI_ISL_1938286                                                                                                                                                                                                                                                                                                                                    | UNC Charlotte COVID-19 Testing Lab                                                                                         | UNC Charlotte Environmental Monitoring Laboratory                                                                                                           | Cynthia Gibas, Kevin Lambirth, Angelica Martins, Jannatul Ferdous, Visva Barua, Jessica Schlueter                                                                                                                                                                                                                                                                                                                                                                        |
| EPI_ISL_1938544                                                                                                                                                                                                                                                                                                                                    | Illinois Department of Public Health - Springfield Lab                                                                     | Illinois Department of Public Health - Springfield Lab                                                                                                      | Bryan Sim, Gordon McCall                                                                                                                                                                                                                                                                                                                                                                                                                                                 |
| EPI_ISL_1939110, EPI_ISL_1939113, EPI_ISL_1939135, EPI_ISL_1939145                                                                                                                                                                                                                                                                                 | Institute for Infectious Diseases, University of Bern, Switzerland                                                         | Institute for Infectious Diseases, University of Bern, Switzerland                                                                                          | Stefan Neuenchwander, Christian Baumann, Miguel A Terrazos Miani, Cora Sägesser, Pascal Bittel, Peter Keller, Franziska Suter-Riniker, Stephen L Leib, Alban Ramette                                                                                                                                                                                                                                                                                                     |
| EPI_ISL_1940794, EPI_ISL_1940810, EPI_ISL_1940817, EPI_ISL_1940831, EPI_ISL_1940897, EPI_ISL_1940898, EPI_ISL_1940970, EPI_ISL_1940971, EPI_ISL_1941019, EPI_ISL_1941094, EPI_ISL_1941111                                                                                                                                                          | see above                                                                                                                  | Landesamt für Verbraucherschutz Sachsen Anhalt, Magdeburg                                                                                                   | Institute of Medical Microbiology and Hospital Hygiene                                                                                                                                                                                                                                                                                                                                                                                                                   |
|                                                                                                                                                                                                                                                                                                                                                    |                                                                                                                            |                                                                                                                                                             | Prof. Dr. Achim Kaasch, Aljoscha Tersteegen                                                                                                                                                                                                                                                                                                                                                                                                                              |

|                                                                                                      |                                                                                                                                                                                                                     |                                                                                                        |                                                                                                                                                                                                                                                                                                                                                                                                                                                                                                                                                                                                                                                                                                                                                                                                                                                                                                                                                                                                                                                    |
|------------------------------------------------------------------------------------------------------|---------------------------------------------------------------------------------------------------------------------------------------------------------------------------------------------------------------------|--------------------------------------------------------------------------------------------------------|----------------------------------------------------------------------------------------------------------------------------------------------------------------------------------------------------------------------------------------------------------------------------------------------------------------------------------------------------------------------------------------------------------------------------------------------------------------------------------------------------------------------------------------------------------------------------------------------------------------------------------------------------------------------------------------------------------------------------------------------------------------------------------------------------------------------------------------------------------------------------------------------------------------------------------------------------------------------------------------------------------------------------------------------------|
| EPI_ISL_1941166                                                                                      | Institute of Medical Microbiology and Hospital Hygiene                                                                                                                                                              | Institute of Medical Microbiology and Hospital Hygiene                                                 | Prof. Dr. Achim Kaasch, Aljoscha Tersteegen                                                                                                                                                                                                                                                                                                                                                                                                                                                                                                                                                                                                                                                                                                                                                                                                                                                                                                                                                                                                        |
| EPI_ISL_1941443                                                                                      | Landesamt für Verbraucherschutz Sachsen Anhalt, Magdeburg                                                                                                                                                           | Institute of Medical Microbiology and Hospital Hygiene                                                 | Prof. Dr. Achim Kaasch, Aljoscha Tersteegen                                                                                                                                                                                                                                                                                                                                                                                                                                                                                                                                                                                                                                                                                                                                                                                                                                                                                                                                                                                                        |
| EPI_ISL_1942242                                                                                      | Laboratory Corporation of America                                                                                                                                                                                   | Centers for Disease Control and Prevention Division of Viral Diseases, Pathogen Discovery              | Dakota Howard, Dhvani Batra, Peter W. Cook, Kara Moser, Adrian Paskey, Jason Caravas, Benjamin Rambo-Martin, Shatavia Morrison, Christopher Gulvick, Scott Sammons, Yvette Unoarumhi, Darlene Wagner, Matthew Schmeier, Minoo Agarwal, Eyad Almasri, Debbie Boles, Ayla Burns, Nuthawin Charoensri, Oren Cohen, Susan Countryman, Mary Ann Cristobal, Bobbi Croy, Suzanne Dale, Hrushikesh Deshmukh, Amanda Douglas, Vincent Drouillon, Marcia Eisenberg, Howard Engler, Rama Ghatti, Prashant Gupta, Susan Hicks, Jake Humphrey, Lax Iyer, Manoj Jain, Mohan Kolli, Brian Krueger, Tim Kuphal, Stanley Letovsky, Michael Levandoski, Craig Lukasik, Jonathan Meltzer, Brian Norvell, Mindy Nye, Scott Parker, Christos Petropoulos, John Pruitt, Steven Ragan, Scott Ryan, Mike Sapeta, Jana Schroth, Suresh Babu Selvaraju, Goran Stencovic, Amanda Suchanek, Andrea Throop, Lyndon Tilson, Thomas Urban, Joe Voshell, Kimberly Wagner, Jonathan Williams, Mary Williamson, Qian Zeng, Tricia Zwielfelhofer, Clinton R. Paden, Duncan MacCannell |
| EPI_ISL_1960682, EPI_ISL_1960698, EPI_ISL_1960776                                                    | National Virus Reference Laboratory                                                                                                                                                                                 | National Virus Reference Laboratory                                                                    | Zoe Yandle, Charlene Bennett, Gabriel Gonzalez, Michael Carr, Jonathan Dean, Cillian F De Gascun                                                                                                                                                                                                                                                                                                                                                                                                                                                                                                                                                                                                                                                                                                                                                                                                                                                                                                                                                   |
| EPI_ISL_1960983                                                                                      | Willis-Knighton Medical Center Hospital Laboratory                                                                                                                                                                  | LSUHS Emerging Viral Threat Laboratory                                                                 | Gregory L. Ware, Alexander Mijalis, Jeremy P. Kamil, Jennifer L. Carroll, Maarten Van Diest, Rona S. Scott, Andrew D. Yurochko, Christopher G. Kevill, John A. Vanchiere                                                                                                                                                                                                                                                                                                                                                                                                                                                                                                                                                                                                                                                                                                                                                                                                                                                                           |
| EPI_ISL_1964662                                                                                      | MEPHI, Aix Marseille University                                                                                                                                                                                     | MEPHI, Aix Marseille University                                                                        | Anthony LEVASSEUR                                                                                                                                                                                                                                                                                                                                                                                                                                                                                                                                                                                                                                                                                                                                                                                                                                                                                                                                                                                                                                  |
| EPI_ISL_1964974, EPI_ISL_1964976                                                                     | Illinois Department of Public Health                                                                                                                                                                                | Illinois Department of Public Health - Chicago Lab                                                     | Vineet K. Dhiman, Ira Heimler, Joel Price                                                                                                                                                                                                                                                                                                                                                                                                                                                                                                                                                                                                                                                                                                                                                                                                                                                                                                                                                                                                          |
| EPI_ISL_1965644, EPI_ISL_1965646                                                                     | Elling group, Institute of Molecular Biotechnology (IMBA)                                                                                                                                                           | Bergthaler laboratory, CeMM Research Center for Molecular Medicine of the Austrian Academy of Sciences | Lukas Endler, Anna Schedl, Fabian Amman, Petr Triska, Thomas Penz, Benedikt Agerer, Maelle Le Moing, Michael Schuster, Bekir Erguner, Jan Laine, Martin Senekowitsch, Christoph Bock, Andreas Bergthaler                                                                                                                                                                                                                                                                                                                                                                                                                                                                                                                                                                                                                                                                                                                                                                                                                                           |
| EPI_ISL_1967652                                                                                      | Maryland Genomics, Institute for Genome Sciences, University of Maryland School of Medicine                                                                                                                         | Maryland Genomics, Institute for Genome Sciences, University of Maryland School of Medicine            | Tallon, Luke J; Sadzewicz, Lisa D; Humphrys, Mike; Ott, Sandra; Roussey, Holly; Mehta, Aditya; Vavikolanu, Kranthi; Fraser, Claire M; Ravel, Jacques                                                                                                                                                                                                                                                                                                                                                                                                                                                                                                                                                                                                                                                                                                                                                                                                                                                                                               |
| EPI_ISL_1967871                                                                                      | Servicio de Microbiología. Hospital Universitario Doctor Peset                                                                                                                                                      | SeqCOVID-SPAIN consortium/IBV(CSIC)                                                                    | Juan Alberola Enguidanos, Juan José Camarena Miñana, Rosa González Pellicer, José Miguel Nogueira Coito and SeqCOVID-SPAIN consortium                                                                                                                                                                                                                                                                                                                                                                                                                                                                                                                                                                                                                                                                                                                                                                                                                                                                                                              |
| EPI_ISL_1969540                                                                                      | Scripps Medical Laboratory                                                                                                                                                                                          | Andersen lab at Scripps Research                                                                       | SEARCH Alliance San Diego with Michael Quigley, Ellen Stefanski, Ian Mchardy                                                                                                                                                                                                                                                                                                                                                                                                                                                                                                                                                                                                                                                                                                                                                                                                                                                                                                                                                                       |
| EPI_ISL_1970547, EPI_ISL_1970548, EPI_ISL_1970550                                                    | Nigeria Centre for Disease Control (NCDC)                                                                                                                                                                           | African Centre for Excellence for Genomics of Infectious Diseases (ACEGID), Redeemer's University      | Olawoye, I.B., Oluniyi, P.E., Eromon, P.E., Oguzie, J.U., Kayode, A.T., Uwanibe, J.N., Ugwu, C.A., Akano, K.O., Ajogbasile, F.V., Abechi, P.S., Olumade, T.J., Folarin, O., Happi, C.T.                                                                                                                                                                                                                                                                                                                                                                                                                                                                                                                                                                                                                                                                                                                                                                                                                                                            |
| EPI_ISL_1970947                                                                                      | New Mexico Department of Health Scientific Laboratory                                                                                                                                                               | New Mexico Department of Health Scientific Laboratory                                                  | Ellie Johnson, Anastacia Griego-Fisher, D'eldra Malone, Jennifer Benoit, Linda Salazar, Ratheesh Rajan, Mark Willmon                                                                                                                                                                                                                                                                                                                                                                                                                                                                                                                                                                                                                                                                                                                                                                                                                                                                                                                               |
| EPI_ISL_1971452, EPI_ISL_1971456, EPI_ISL_1971458                                                    | TXDSHS                                                                                                                                                                                                              | TXDSHS                                                                                                 | Rashmi Tuladhar, Bonnie Oh, Jenny Zhang, Maliha Rahman, Mayela Pedrueza, Anita Pokharel, Karen Bobier, Lorraine Rodriguez, Myong Koag, Chun Wang, Rachel Lee, Grace Kubin                                                                                                                                                                                                                                                                                                                                                                                                                                                                                                                                                                                                                                                                                                                                                                                                                                                                          |
| EPI_ISL_1972157, EPI_ISL_1972190, EPI_ISL_1972191                                                    | Labor Berlin Charite Vivantes GmbH / Institut für Virologie                                                                                                                                                         | Charite Universitätsmedizin Berlin, Institut für Virologie/Labor Berlin                                | Peter Menzel, Christine Stephan, Rolf Schwarzer, Victor M Corman, Barbara Muhlemann, Terry Jones, Christian Drosten                                                                                                                                                                                                                                                                                                                                                                                                                                                                                                                                                                                                                                                                                                                                                                                                                                                                                                                                |
| EPI_ISL_1972288                                                                                      | Baylor Scott & White-Temple                                                                                                                                                                                         | Baylor Scott & White-Temple                                                                            | Ari Rao, Linden Morales, Kimberly Walker, Marcus Volz, Shelby Hendrickson                                                                                                                                                                                                                                                                                                                                                                                                                                                                                                                                                                                                                                                                                                                                                                                                                                                                                                                                                                          |
| EPI_ISL_1972659                                                                                      | National Virus Reference Laboratory                                                                                                                                                                                 | National Virus Reference Laboratory                                                                    | Guerrino Macori, Gabriel Gonzalez, Michael Carr, Zoe Yandle, Charlene Bennett, Jonathan Dean, Seamus Fanning, Cillian F De Gascun                                                                                                                                                                                                                                                                                                                                                                                                                                                                                                                                                                                                                                                                                                                                                                                                                                                                                                                  |
| EPI_ISL_1972733, EPI_ISL_1972753, EPI_ISL_1972766, EPI_ISL_1972774                                   | National Virus Reference Laboratory                                                                                                                                                                                 | National Virus Reference Laboratory                                                                    | Zoe Yandle, Charlene Bennett, Gabriel Gonzalez, Michael Carr, Jonathan Dean, Cillian F De Gascun                                                                                                                                                                                                                                                                                                                                                                                                                                                                                                                                                                                                                                                                                                                                                                                                                                                                                                                                                   |
| EPI_ISL_1972806                                                                                      | National Virus Reference Laboratory                                                                                                                                                                                 | National Virus Reference Laboratory                                                                    | Fiona Crispie, Calum Walsh, Matthew McCabe, Zoe Yandle, Charlene Bennet, Gabriel Gonzalez, Michael Carr, Jonathan Dean, Paul Cotter, Cillian F De Gascun                                                                                                                                                                                                                                                                                                                                                                                                                                                                                                                                                                                                                                                                                                                                                                                                                                                                                           |
| EPI_ISL_1972883                                                                                      | National Virus Reference Laboratory                                                                                                                                                                                 | National Virus Reference Laboratory                                                                    | Zoe Yandle, Charlene Bennett, Gabriel Gonzalez, Michael Carr, Jonathan Dean, Cillian F De Gascun                                                                                                                                                                                                                                                                                                                                                                                                                                                                                                                                                                                                                                                                                                                                                                                                                                                                                                                                                   |
| EPI_ISL_1973330, EPI_ISL_1973332, EPI_ISL_1973338, EPI_ISL_1973391                                   | Johns Hopkins Hospital Department of Pathology                                                                                                                                                                      | Johns Hopkins Hospital Department of Pathology                                                         | C. Paul Morris, Chun Huai Luo, Adannaya Amadi, Nicholas Gallagher, Matthew Schwartz, Heba H. Mostafa                                                                                                                                                                                                                                                                                                                                                                                                                                                                                                                                                                                                                                                                                                                                                                                                                                                                                                                                               |
| EPI_ISL_1978363                                                                                      | Northumbria University / South Tees Hospitals NHS Foundation Trust / North Cumbria Integrated Care NHS Foundation Trust / North Tees and Hartlepool NHS Foundation Trust / Newcastle Hospitals NHS Foundation Trust | COVID-19 Genomics UK (COG-UK) Consortium                                                               | Darren L Smith, Andrew Nelson, Matthew Bashton, Greg R Young, Joshua Loh, John Allan, Mohammad A Tariq, Giles S Holt, Gary Black, Wen C Yew, Lynn Dover, Paul Baker, Steve Liggett, Sarah Essex, Jane Greenaway, Debra Padgett, Clive Graham, Garren Scott, Edward Barton, Emma Swindells, Brendan Payne, Jennifer Collins, Yusri Taha, Gary Eltringham                                                                                                                                                                                                                                                                                                                                                                                                                                                                                                                                                                                                                                                                                            |
| EPI_ISL_1980111, EPI_ISL_1980112, EPI_ISL_1980114, EPI_ISL_1980118                                   | Centre for Enzyme Innovation, University of Portsmouth / Translational Research Laboratory, Portsmouth Hospitals NHS Trust                                                                                          | COVID-19 Genomics UK (COG-UK) Consortium                                                               | Angela Beckett, Salman Goudarzi, Christopher Fearn, Kate Cook, Katie Loveson, Sharon Glaysher, Scott Elliott, Samuel Robson                                                                                                                                                                                                                                                                                                                                                                                                                                                                                                                                                                                                                                                                                                                                                                                                                                                                                                                        |
| EPI_ISL_1982493, EPI_ISL_1982531, EPI_ISL_1982575, EPI_ISL_1984768                                   | Labor Berlin Charite Vivantes GmbH / Institut für Virologie                                                                                                                                                         | Charite Universitätsmedizin Berlin, Institut für Virologie/Labor Berlin                                | Peter Menzel, Christine Stephan, Rolf Schwarzer, Victor M Corman, Barbara Muhlemann, Terry Jones, Christian Drosten                                                                                                                                                                                                                                                                                                                                                                                                                                                                                                                                                                                                                                                                                                                                                                                                                                                                                                                                |
| EPI_ISL_1985368, EPI_ISL_1985404, EPI_ISL_1985553, EPI_ISL_1985611, EPI_ISL_1985652, EPI_ISL_1985706 | Lighthouse Lab in Milton Keynes                                                                                                                                                                                     | Wellcome Sanger Institute for the COVID-19 Genomics UK (COG-UK) Consortium                             | The Lighthouse Lab in Milton Keynes and Alex Alderton, Roberto Amato, Jeffrey Barrett, Sonia Goncalves, Ewan Harrison, David K. Jackson, Ian Johnston, Dominic Kwiatkowski, Cordelia Langford, John Sillitoe on behalf of the Wellcome Sanger Institute COVID-19 Surveillance Team                                                                                                                                                                                                                                                                                                                                                                                                                                                                                                                                                                                                                                                                                                                                                                 |
| EPI_ISL_1986949, EPI_ISL_1986983, EPI_ISL_1987182                                                    | Randox Laboratories                                                                                                                                                                                                 | Wellcome Sanger Institute for the COVID-19 Genomics UK (COG-UK) Consortium                             | Randox Laboratories and Alex Alderton, Roberto Amato, Jeffrey Barrett, Sonia Goncalves, Ewan Harrison, David K. Jackson, Ian Johnston, Dominic Kwiatkowski, Cordelia Langford, John Sillitoe on behalf of the Wellcome Sanger Institute COVID-19 Surveillance Team                                                                                                                                                                                                                                                                                                                                                                                                                                                                                                                                                                                                                                                                                                                                                                                 |
| EPI_ISL_1987305                                                                                      | Lighthouse Lab in Milton Keynes                                                                                                                                                                                     | Wellcome Sanger Institute for the COVID-19 Genomics UK (COG-UK) Consortium                             | The Lighthouse Lab in Milton Keynes and Alex Alderton, Roberto Amato, Jeffrey Barrett, Sonia Goncalves, Ewan Harrison, David K. Jackson, Ian Johnston, Dominic Kwiatkowski, Cordelia Langford, John Sillitoe on behalf of the Wellcome Sanger Institute COVID-19 Surveillance Team                                                                                                                                                                                                                                                                                                                                                                                                                                                                                                                                                                                                                                                                                                                                                                 |
| EPI_ISL_1988207, EPI_ISL_1988213, EPI_ISL_1989279                                                    | Labor Berlin Charite Vivantes GmbH / Institut für Virologie                                                                                                                                                         | Charite Universitätsmedizin Berlin, Institut für Virologie/Labor Berlin                                | Peter Menzel, Christine Stephan, Rolf Schwarzer, Victor M Corman, Barbara Muhlemann, Terry Jones, Christian Drosten                                                                                                                                                                                                                                                                                                                                                                                                                                                                                                                                                                                                                                                                                                                                                                                                                                                                                                                                |
| EPI_ISL_1991401                                                                                      | Helix/Illumina                                                                                                                                                                                                      | Centers for Disease Control and Prevention Division of Viral Diseases, Pathogen Discovery              | Dakota Howard, Dhvani Batra, Peter W. Cook, Kara Moser, Adrian Paskey, Jason Caravas, Benjamin Rambo-Martin, Shatavia Morrison, Christopher Gulvick, Scott Sammons, Yvette Unoarumhi, Darlene Wagner, Matthew Schmeier, Eileen de Feo, Jan Antico, Christine Tran, Matthew Tolentino, Shannon Wickline, Kim Gietzen, Brad SICKLER, Jingtao Liu, Eric Allen, Phil Febbo, Nicole L. Washington, Simon White, Geraint Levin, Kelly Schiabor Barrett, Elizabeth Cirulli, Alexandre Bolze, Ary Ascencio, Charlotte Rivera-Garcia, Ryan Cho, Jason Ngyuen, Sherry Wang, Jimmy Ramirez, Tyler Cassens, Efen Sandoval, Magnus Isaksson, William Lee, David Becker, Marc Laurent, James Lu, Clinton R. Paden, Duncan MacCannell                                                                                                                                                                                                                                                                                                                             |
| EPI_ISL_2000666, EPI_ISL_2000667, EPI_ISL_2000668, EPI_ISL_2000669, EPI_ISL_2000670, EPI_ISL_2000671 | Viollier AG                                                                                                                                                                                                         | Viollier AG                                                                                            | Andrea Patrizia Salzmann, Henriette Kurth, Christiane Beckmann, Maurice Redondo, Olivier Kobel, Christoph Noppen                                                                                                                                                                                                                                                                                                                                                                                                                                                                                                                                                                                                                                                                                                                                                                                                                                                                                                                                   |
| EPI_ISL_2000773, EPI_ISL_2000774, EPI_ISL_2000836                                                    | Illinois Department of Public Health - Springfield Lab                                                                                                                                                              | Illinois Department of Public Health - Springfield Lab                                                 | Bryan Sim, Gordon McCall                                                                                                                                                                                                                                                                                                                                                                                                                                                                                                                                                                                                                                                                                                                                                                                                                                                                                                                                                                                                                           |
| EPI_ISL_2003692                                                                                      | Virginia Division of Consolidated Laboratory Services                                                                                                                                                               | Virginia Division of Consolidated Laboratory Services                                                  | Virginia DCLS                                                                                                                                                                                                                                                                                                                                                                                                                                                                                                                                                                                                                                                                                                                                                                                                                                                                                                                                                                                                                                      |
| EPI_ISL_2004309                                                                                      | Instituto Nacional de Saude (INSA) e i3S - Instituto de Investigação e Inovação em Saúde                                                                                                                            | Instituto Nacional de Saude (INSA)                                                                     | Borges et al                                                                                                                                                                                                                                                                                                                                                                                                                                                                                                                                                                                                                                                                                                                                                                                                                                                                                                                                                                                                                                       |
| EPI_ISL_2005515                                                                                      | Lighthouse Lab in Alderley Park                                                                                                                                                                                     | Wellcome Sanger Institute for the COVID-19 Genomics UK (COG-UK) Consortium                             | Jacquelyn Wynn, Mairead Hyland, The Lighthouse Lab in Alderley Park and Alex Alderton, Roberto Amato, Jeffrey Barrett, Sonia Goncalves, Ewan Harrison, David K. Jackson, Ian Johnston, Dominic Kwiatkowski, Cordelia Langford, John Sillitoe on behalf of the Wellcome Sanger Institute COVID-19                                                                                                                                                                                                                                                                                                                                                                                                                                                                                                                                                                                                                                                                                                                                                   |

| Surveillance Team                                                                                                                                                                                                                                                                                                                                                                                                                                                                                                                                                                                                                                                                                                                                                                                                                                                                                                                                                                                                                                                                                                                                                                                                                                                                                                                                                                                                                                                                                                                                                                                                                                                                                                                                                                                                                                                                                                                                                                                                                                                                                                                                                                                                                                                                                                                                                                                                                                                                                                                                                                                                                                                                                                                                                                                                                                                                                                                                                                                                                                                                                                                                                                  |                                                                                                                |                                                                                                                                    |                                                                                                                                                                                                                                                                                                                                                                                                                                                                          |                                                                                                                                                                                                                                                                                                                                                                                                                             |
|------------------------------------------------------------------------------------------------------------------------------------------------------------------------------------------------------------------------------------------------------------------------------------------------------------------------------------------------------------------------------------------------------------------------------------------------------------------------------------------------------------------------------------------------------------------------------------------------------------------------------------------------------------------------------------------------------------------------------------------------------------------------------------------------------------------------------------------------------------------------------------------------------------------------------------------------------------------------------------------------------------------------------------------------------------------------------------------------------------------------------------------------------------------------------------------------------------------------------------------------------------------------------------------------------------------------------------------------------------------------------------------------------------------------------------------------------------------------------------------------------------------------------------------------------------------------------------------------------------------------------------------------------------------------------------------------------------------------------------------------------------------------------------------------------------------------------------------------------------------------------------------------------------------------------------------------------------------------------------------------------------------------------------------------------------------------------------------------------------------------------------------------------------------------------------------------------------------------------------------------------------------------------------------------------------------------------------------------------------------------------------------------------------------------------------------------------------------------------------------------------------------------------------------------------------------------------------------------------------------------------------------------------------------------------------------------------------------------------------------------------------------------------------------------------------------------------------------------------------------------------------------------------------------------------------------------------------------------------------------------------------------------------------------------------------------------------------------------------------------------------------------------------------------------------------|----------------------------------------------------------------------------------------------------------------|------------------------------------------------------------------------------------------------------------------------------------|--------------------------------------------------------------------------------------------------------------------------------------------------------------------------------------------------------------------------------------------------------------------------------------------------------------------------------------------------------------------------------------------------------------------------------------------------------------------------|-----------------------------------------------------------------------------------------------------------------------------------------------------------------------------------------------------------------------------------------------------------------------------------------------------------------------------------------------------------------------------------------------------------------------------|
| EPI_ISL_2005555, EPI_ISL_2005910, EPI_ISL_2006537                                                                                                                                                                                                                                                                                                                                                                                                                                                                                                                                                                                                                                                                                                                                                                                                                                                                                                                                                                                                                                                                                                                                                                                                                                                                                                                                                                                                                                                                                                                                                                                                                                                                                                                                                                                                                                                                                                                                                                                                                                                                                                                                                                                                                                                                                                                                                                                                                                                                                                                                                                                                                                                                                                                                                                                                                                                                                                                                                                                                                                                                                                                                  | Lighthouse Lab in Milton Keynes                                                                                | Wellcome Sanger Institute for the COVID-19 Genomics UK (COG-UK) Consortium                                                         | The Lighthouse Lab in Milton Keynes and Alex Alderton, Roberto Amato, Jeffrey Barrett, Sonia Goncalves, Ewan Harrison, David K. Jackson, Ian Johnston, Dominic Kwiatkowski, Cordelia Langford, John Sillitoe on behalf of the Wellcome Sanger Institute COVID-19 Surveillance Team                                                                                                                                                                                       |                                                                                                                                                                                                                                                                                                                                                                                                                             |
| EPI_ISL_2006546, EPI_ISL_2006549                                                                                                                                                                                                                                                                                                                                                                                                                                                                                                                                                                                                                                                                                                                                                                                                                                                                                                                                                                                                                                                                                                                                                                                                                                                                                                                                                                                                                                                                                                                                                                                                                                                                                                                                                                                                                                                                                                                                                                                                                                                                                                                                                                                                                                                                                                                                                                                                                                                                                                                                                                                                                                                                                                                                                                                                                                                                                                                                                                                                                                                                                                                                                   | Health Services Laboratories                                                                                   | Wellcome Sanger Institute for the COVID-19 Genomics UK (COG-UK) Consortium                                                         | Health Services Laboratories and Alex Alderton, Roberto Amato, Jeffrey Barrett, Sonia Goncalves, Ewan Harrison, David K. Jackson, Ian Johnston, Dominic Kwiatkowski, Cordelia Langford, John Sillitoe on behalf of the Wellcome Sanger Institute COVID-19 Surveillance Team                                                                                                                                                                                              |                                                                                                                                                                                                                                                                                                                                                                                                                             |
| EPI_ISL_2006924                                                                                                                                                                                                                                                                                                                                                                                                                                                                                                                                                                                                                                                                                                                                                                                                                                                                                                                                                                                                                                                                                                                                                                                                                                                                                                                                                                                                                                                                                                                                                                                                                                                                                                                                                                                                                                                                                                                                                                                                                                                                                                                                                                                                                                                                                                                                                                                                                                                                                                                                                                                                                                                                                                                                                                                                                                                                                                                                                                                                                                                                                                                                                                    | Montana Public Health Laboratory                                                                               | Montana Public Health Laboratory                                                                                                   | Joy Ritter, Michelle Mozer, Carrie Biskupiak, Deborah Gibson                                                                                                                                                                                                                                                                                                                                                                                                             |                                                                                                                                                                                                                                                                                                                                                                                                                             |
| EPI_ISL_2006974                                                                                                                                                                                                                                                                                                                                                                                                                                                                                                                                                                                                                                                                                                                                                                                                                                                                                                                                                                                                                                                                                                                                                                                                                                                                                                                                                                                                                                                                                                                                                                                                                                                                                                                                                                                                                                                                                                                                                                                                                                                                                                                                                                                                                                                                                                                                                                                                                                                                                                                                                                                                                                                                                                                                                                                                                                                                                                                                                                                                                                                                                                                                                                    | The Ohio State University Applied Microbiology Services Laboratory                                             | The Ohio State University Applied Microbiology Services Laboratory                                                                 | Seth A. Faith PhD                                                                                                                                                                                                                                                                                                                                                                                                                                                        |                                                                                                                                                                                                                                                                                                                                                                                                                             |
| EPI_ISL_2008309, EPI_ISL_2008310                                                                                                                                                                                                                                                                                                                                                                                                                                                                                                                                                                                                                                                                                                                                                                                                                                                                                                                                                                                                                                                                                                                                                                                                                                                                                                                                                                                                                                                                                                                                                                                                                                                                                                                                                                                                                                                                                                                                                                                                                                                                                                                                                                                                                                                                                                                                                                                                                                                                                                                                                                                                                                                                                                                                                                                                                                                                                                                                                                                                                                                                                                                                                   | Massachusetts State Public Health Laboratory                                                                   | Massachusetts State Public Health Laboratory                                                                                       | Andrew Lang, Timelia Fink, Glen Gallagher, Sandra Smole                                                                                                                                                                                                                                                                                                                                                                                                                  |                                                                                                                                                                                                                                                                                                                                                                                                                             |
| EPI_ISL_2011689                                                                                                                                                                                                                                                                                                                                                                                                                                                                                                                                                                                                                                                                                                                                                                                                                                                                                                                                                                                                                                                                                                                                                                                                                                                                                                                                                                                                                                                                                                                                                                                                                                                                                                                                                                                                                                                                                                                                                                                                                                                                                                                                                                                                                                                                                                                                                                                                                                                                                                                                                                                                                                                                                                                                                                                                                                                                                                                                                                                                                                                                                                                                                                    | Moderna Inc.                                                                                                   | Moderna Inc.                                                                                                                       | Yamuna Paila; Groves Dixon; Rolando Pajon                                                                                                                                                                                                                                                                                                                                                                                                                                |                                                                                                                                                                                                                                                                                                                                                                                                                             |
| EPI_ISL_2011739, EPI_ISL_2011751, EPI_ISL_2011752, EPI_ISL_2011758, EPI_ISL_2011760, EPI_ISL_2011792, EPI_ISL_2011794, EPI_ISL_2011802, EPI_ISL_2011803, EPI_ISL_2011807, EPI_ISL_2011816, EPI_ISL_2011817, EPI_ISL_2011824, EPI_ISL_2011826, EPI_ISL_2011828, EPI_ISL_2011832, EPI_ISL_2011834, EPI_ISL_2011837, EPI_ISL_2011838, EPI_ISL_2011853, EPI_ISL_2011854, EPI_ISL_2011855, EPI_ISL_2011866, EPI_ISL_2011911, EPI_ISL_2011915, EPI_ISL_2011919, EPI_ISL_2011959, EPI_ISL_2011966, EPI_ISL_2011968, EPI_ISL_2011974, EPI_ISL_2011975, EPI_ISL_2011978, EPI_ISL_2011981, EPI_ISL_2011984, EPI_ISL_2011987, EPI_ISL_2011992, EPI_ISL_2012002, EPI_ISL_2012024, EPI_ISL_2012025, EPI_ISL_2012031, EPI_ISL_2012046, EPI_ISL_2012052, EPI_ISL_2012054, EPI_ISL_2012055, EPI_ISL_2012056, EPI_ISL_2012058, EPI_ISL_2012078, EPI_ISL_2012079, EPI_ISL_2012086, EPI_ISL_2012089, EPI_ISL_2012116, EPI_ISL_2012124, EPI_ISL_2012129, EPI_ISL_2012148, EPI_ISL_2012150, EPI_ISL_2012157, EPI_ISL_2012159, EPI_ISL_2012160, EPI_ISL_2012172, EPI_ISL_2012181, EPI_ISL_2012186, EPI_ISL_2012187, EPI_ISL_2012192, EPI_ISL_2012193, EPI_ISL_2012196, EPI_ISL_2012201, EPI_ISL_2012209, EPI_ISL_2012223, EPI_ISL_2012226, EPI_ISL_2012228, EPI_ISL_2012229, EPI_ISL_2012230, EPI_ISL_2012251, EPI_ISL_2012261, EPI_ISL_2012266, EPI_ISL_2012272, EPI_ISL_2012273, EPI_ISL_2012295, EPI_ISL_2012298, EPI_ISL_2012309, EPI_ISL_2012310, EPI_ISL_2012316, EPI_ISL_2012319, EPI_ISL_2012324, EPI_ISL_2012327, EPI_ISL_2012365, EPI_ISL_2012366, EPI_ISL_2012368, EPI_ISL_2012369, EPI_ISL_2012384, EPI_ISL_2012395, EPI_ISL_2012417, EPI_ISL_2012423, EPI_ISL_2012424, EPI_ISL_2012425, EPI_ISL_2012563, EPI_ISL_2012564, EPI_ISL_2012570, EPI_ISL_2012575, EPI_ISL_2012583, EPI_ISL_2012593, EPI_ISL_2012602, EPI_ISL_2012604, EPI_ISL_2012605, EPI_ISL_2012608, EPI_ISL_2012610, EPI_ISL_2012613, EPI_ISL_2012615, EPI_ISL_2012617, EPI_ISL_2012632, EPI_ISL_2012633, EPI_ISL_2012634, EPI_ISL_2012636, EPI_ISL_2012643, EPI_ISL_2012646, EPI_ISL_2012647, EPI_ISL_2012649, EPI_ISL_2012650, EPI_ISL_2012656, EPI_ISL_2012679, EPI_ISL_2012702, EPI_ISL_2012710, EPI_ISL_2012725, EPI_ISL_2012744, EPI_ISL_2012747, EPI_ISL_2012749, EPI_ISL_2012751, EPI_ISL_2012752, EPI_ISL_2012762, EPI_ISL_2012763, EPI_ISL_2012786, EPI_ISL_2012789, EPI_ISL_2012790, EPI_ISL_2012801, EPI_ISL_2012802, EPI_ISL_2012803, EPI_ISL_2012808, EPI_ISL_2012809, EPI_ISL_2012815, EPI_ISL_2012816, EPI_ISL_2012837, EPI_ISL_2012838, EPI_ISL_2012842, EPI_ISL_2012846, EPI_ISL_2012847, EPI_ISL_2012848, EPI_ISL_2012850, EPI_ISL_2012852, EPI_ISL_2012860, EPI_ISL_2012866, EPI_ISL_2012867, EPI_ISL_2012869, EPI_ISL_2012870, EPI_ISL_2012871, EPI_ISL_2012874, EPI_ISL_2012875, EPI_ISL_2012881, EPI_ISL_2012899, EPI_ISL_2012902, EPI_ISL_2012905, EPI_ISL_2012907, EPI_ISL_2012908, EPI_ISL_2012927, EPI_ISL_2012941, EPI_ISL_2012964, EPI_ISL_2012967, EPI_ISL_2012968, EPI_ISL_2012969, EPI_ISL_2012970, EPI_ISL_2012971, EPI_ISL_2012972, EPI_ISL_2012983, EPI_ISL_2012988, EPI_ISL_2012990, EPI_ISL_2013000, EPI_ISL_2013010, EPI_ISL_2013020, EPI_ISL_2013021, EPI_ISL_2013022, EPI_ISL_2013024 | see above                                                                                                      | Public Health Ontario Laboratory                                                                                                   | Public Health Ontario Laboratory                                                                                                                                                                                                                                                                                                                                                                                                                                         | Vanessa G Allen, Philip Banh, Yao Chen, Richard de Borja, Alireza Eshaghi, Nahuel Fittipaldi, Christine Frantz, Jonathan B Gubbay, Jennifer L Guthrie, Lawrence Heisler, Esha Joshi, Michael Laszloffy, Aimin Li, Michael CY Li, Dean Maxwell, Sandeep Nagra, Samir N Patel, Jared Simpson, Karthikeyan Sivaraman, Ashleigh Sullivan, Yogi Sundaravadanam, Sarah Teatero, Andre Villegas, Matthew Watson, Sandra Zittermann |
| EPI_ISL_2016003                                                                                                                                                                                                                                                                                                                                                                                                                                                                                                                                                                                                                                                                                                                                                                                                                                                                                                                                                                                                                                                                                                                                                                                                                                                                                                                                                                                                                                                                                                                                                                                                                                                                                                                                                                                                                                                                                                                                                                                                                                                                                                                                                                                                                                                                                                                                                                                                                                                                                                                                                                                                                                                                                                                                                                                                                                                                                                                                                                                                                                                                                                                                                                    | MIRIALIS CLUSES BECHET                                                                                         | CNR Virus des Infections Respiratoires - France SUD                                                                                | Antonin Bal, Gregory Destras, Gwendolynne Burfin, Hadrien Regue, Quentin Semanas, Martine Valette, Bruno Lina, Laurence Josset                                                                                                                                                                                                                                                                                                                                           |                                                                                                                                                                                                                                                                                                                                                                                                                             |
| EPI_ISL_2017167, EPI_ISL_2017168                                                                                                                                                                                                                                                                                                                                                                                                                                                                                                                                                                                                                                                                                                                                                                                                                                                                                                                                                                                                                                                                                                                                                                                                                                                                                                                                                                                                                                                                                                                                                                                                                                                                                                                                                                                                                                                                                                                                                                                                                                                                                                                                                                                                                                                                                                                                                                                                                                                                                                                                                                                                                                                                                                                                                                                                                                                                                                                                                                                                                                                                                                                                                   | Viollier AG                                                                                                    | Department of Biosystems Science and Engineering, ETH Zürich                                                                       | Christian Beisel, Sarah Nadeau, Chaoran Chen, Ivan Topolsky, Philipp Jablonski, Lara Fuhrmann, David Dreifuss, Katharina Jahn, Rebecca Denes, Mirjam Feldkamp, Ina Nissen, Natascha Santacroce, Elodie Burcklen, Christiane Beckmann, Maurice Redondo, Olivier Kobel, Christoph Noppen, Sophie Seidel, Noemie Santamaria de Souza, Niko Beerenwinkel, Tanja Stadler                                                                                                      |                                                                                                                                                                                                                                                                                                                                                                                                                             |
| EPI_ISL_2017903, EPI_ISL_2017910                                                                                                                                                                                                                                                                                                                                                                                                                                                                                                                                                                                                                                                                                                                                                                                                                                                                                                                                                                                                                                                                                                                                                                                                                                                                                                                                                                                                                                                                                                                                                                                                                                                                                                                                                                                                                                                                                                                                                                                                                                                                                                                                                                                                                                                                                                                                                                                                                                                                                                                                                                                                                                                                                                                                                                                                                                                                                                                                                                                                                                                                                                                                                   | TXDSHS                                                                                                         | TXDSHS                                                                                                                             | Rashmi Tuladhar, Bonnie Oh, Jenny Zhang, Maliha Rahman, Mayela Pedrueza, Anita Pokharel, Karen Bobier, Lorraine Rodriguez, Myong Koag, Chun Wang, Rachel Lee, Grace Kubin                                                                                                                                                                                                                                                                                                |                                                                                                                                                                                                                                                                                                                                                                                                                             |
| EPI_ISL_2018649, EPI_ISL_2018727, EPI_ISL_2018752, EPI_ISL_2018807                                                                                                                                                                                                                                                                                                                                                                                                                                                                                                                                                                                                                                                                                                                                                                                                                                                                                                                                                                                                                                                                                                                                                                                                                                                                                                                                                                                                                                                                                                                                                                                                                                                                                                                                                                                                                                                                                                                                                                                                                                                                                                                                                                                                                                                                                                                                                                                                                                                                                                                                                                                                                                                                                                                                                                                                                                                                                                                                                                                                                                                                                                                 | Wisconsin State Laboratory of Hygiene Communicable Disease Division                                            | Wisconsin State Laboratory of Hygiene Communicable Disease Division                                                                | Abigail C. Shockey, Alicia J. Mooney, Erika M. Hanson, Tonya Danz, Richard Griesser, Sara Wagner, Kelsey R. Florek                                                                                                                                                                                                                                                                                                                                                       |                                                                                                                                                                                                                                                                                                                                                                                                                             |
| EPI_ISL_2019014, EPI_ISL_2019338, EPI_ISL_2019397                                                                                                                                                                                                                                                                                                                                                                                                                                                                                                                                                                                                                                                                                                                                                                                                                                                                                                                                                                                                                                                                                                                                                                                                                                                                                                                                                                                                                                                                                                                                                                                                                                                                                                                                                                                                                                                                                                                                                                                                                                                                                                                                                                                                                                                                                                                                                                                                                                                                                                                                                                                                                                                                                                                                                                                                                                                                                                                                                                                                                                                                                                                                  | Viollier AG                                                                                                    | Department of Biosystems Science and Engineering, ETH Zürich                                                                       | Chaoran Chen, Sarah Nadeau, Catharine Aquino, Ivan Topolsky, Philipp Jablonski, Lara Fuhrmann, David Dreifuss, Katharina Jahn, Andreia Cabral de Gouvea, Maria Domenica Moccia, Simon Grüter, Timothy Sykes, Lennart Opitz, Griffin White, Laura Neff, Doris Popovic, Andrea Patrignani, Jay Tracy, Ralph Schlapbach, Christiane Beckmann, Maurice Redondo, Olivier Kobel, Christoph Noppen, Sophie Seidel, Noemie Santamaria de Souza, Niko Beerenwinkel, Tanja Stadler |                                                                                                                                                                                                                                                                                                                                                                                                                             |
| EPI_ISL_2020129, EPI_ISL_2020130                                                                                                                                                                                                                                                                                                                                                                                                                                                                                                                                                                                                                                                                                                                                                                                                                                                                                                                                                                                                                                                                                                                                                                                                                                                                                                                                                                                                                                                                                                                                                                                                                                                                                                                                                                                                                                                                                                                                                                                                                                                                                                                                                                                                                                                                                                                                                                                                                                                                                                                                                                                                                                                                                                                                                                                                                                                                                                                                                                                                                                                                                                                                                   | HOSPITAL UNIVERSITARIO SON ESPASES                                                                             | HOSPITAL UNIVERSITARIO SON ESPASES                                                                                                 | Carla López-Causapé, Pablo Fraile-Ribot, Antonio Oliver, SeqCovid                                                                                                                                                                                                                                                                                                                                                                                                        |                                                                                                                                                                                                                                                                                                                                                                                                                             |
| EPI_ISL_2020338                                                                                                                                                                                                                                                                                                                                                                                                                                                                                                                                                                                                                                                                                                                                                                                                                                                                                                                                                                                                                                                                                                                                                                                                                                                                                                                                                                                                                                                                                                                                                                                                                                                                                                                                                                                                                                                                                                                                                                                                                                                                                                                                                                                                                                                                                                                                                                                                                                                                                                                                                                                                                                                                                                                                                                                                                                                                                                                                                                                                                                                                                                                                                                    | UniversitätsSpital ZYrich                                                                                      | Institute of Medical Virology                                                                                                      | Verena Kufner, Gabriela Ziltener, Maryam Zaheri, Stefan Schmutz, Annette Audigz, Maria Grÿnberg, Kevin Steiner, Jon Huder, Cyril Shah, Riccarda Capaul, Guido Bloembergen, Jÿrg Bšni, Michael Huber, Alexandra Trkola                                                                                                                                                                                                                                                    |                                                                                                                                                                                                                                                                                                                                                                                                                             |
| EPI_ISL_2021978                                                                                                                                                                                                                                                                                                                                                                                                                                                                                                                                                                                                                                                                                                                                                                                                                                                                                                                                                                                                                                                                                                                                                                                                                                                                                                                                                                                                                                                                                                                                                                                                                                                                                                                                                                                                                                                                                                                                                                                                                                                                                                                                                                                                                                                                                                                                                                                                                                                                                                                                                                                                                                                                                                                                                                                                                                                                                                                                                                                                                                                                                                                                                                    | Lighthouse Lab in Milton Keynes                                                                                | Wellcome Sanger Institute for the COVID-19 Genomics UK (COG-UK) Consortium                                                         | The Lighthouse Lab in Milton Keynes and Alex Alderton, Roberto Amato, Jeffrey Barrett, Sonia Goncalves, Ewan Harrison, David K. Jackson, Ian Johnston, Dominic Kwiatkowski, Cordelia Langford, John Sillitoe on behalf of the Wellcome Sanger Institute COVID-19 Surveillance Team                                                                                                                                                                                       |                                                                                                                                                                                                                                                                                                                                                                                                                             |
| EPI_ISL_2022509                                                                                                                                                                                                                                                                                                                                                                                                                                                                                                                                                                                                                                                                                                                                                                                                                                                                                                                                                                                                                                                                                                                                                                                                                                                                                                                                                                                                                                                                                                                                                                                                                                                                                                                                                                                                                                                                                                                                                                                                                                                                                                                                                                                                                                                                                                                                                                                                                                                                                                                                                                                                                                                                                                                                                                                                                                                                                                                                                                                                                                                                                                                                                                    | Randox Laboratories                                                                                            | Wellcome Sanger Institute for the COVID-19 Genomics UK (COG-UK) Consortium                                                         | Randox Laboratories and Alex Alderton, Roberto Amato, Jeffrey Barrett, Sonia Goncalves, Ewan Harrison, David K. Jackson, Ian Johnston, Dominic Kwiatkowski, Cordelia Langford, John Sillitoe on behalf of the Wellcome Sanger Institute COVID-19 Surveillance Team                                                                                                                                                                                                       |                                                                                                                                                                                                                                                                                                                                                                                                                             |
| EPI_ISL_2022538                                                                                                                                                                                                                                                                                                                                                                                                                                                                                                                                                                                                                                                                                                                                                                                                                                                                                                                                                                                                                                                                                                                                                                                                                                                                                                                                                                                                                                                                                                                                                                                                                                                                                                                                                                                                                                                                                                                                                                                                                                                                                                                                                                                                                                                                                                                                                                                                                                                                                                                                                                                                                                                                                                                                                                                                                                                                                                                                                                                                                                                                                                                                                                    | Health Services Laboratories                                                                                   | Wellcome Sanger Institute for the COVID-19 Genomics UK (COG-UK) Consortium                                                         | Health Services Laboratories and Alex Alderton, Roberto Amato, Jeffrey Barrett, Sonia Goncalves, Ewan Harrison, David K. Jackson, Ian Johnston, Dominic Kwiatkowski, Cordelia Langford, John Sillitoe on behalf of the Wellcome Sanger Institute COVID-19 Surveillance Team                                                                                                                                                                                              |                                                                                                                                                                                                                                                                                                                                                                                                                             |
| EPI_ISL_2023035                                                                                                                                                                                                                                                                                                                                                                                                                                                                                                                                                                                                                                                                                                                                                                                                                                                                                                                                                                                                                                                                                                                                                                                                                                                                                                                                                                                                                                                                                                                                                                                                                                                                                                                                                                                                                                                                                                                                                                                                                                                                                                                                                                                                                                                                                                                                                                                                                                                                                                                                                                                                                                                                                                                                                                                                                                                                                                                                                                                                                                                                                                                                                                    | Department of Virology, Istituto Zooprofilattico Sperimentale del Lazio e della Toscana (IZSLT)                | Department of General Diagnostics; Department of Virology; Istituto Zooprofilattico Sperimentale del Lazio e della Toscana (IZSLT) | Patricia Alba, Giuseppe Manna, Elena L. Diaconu, Fabiola Feltrin, Raffaella Conti, Teresa Scicluna, Virginia Carfora, Antonella Corsini, Alessia Franco, Antonio Battisti.                                                                                                                                                                                                                                                                                               |                                                                                                                                                                                                                                                                                                                                                                                                                             |
| EPI_ISL_2023381                                                                                                                                                                                                                                                                                                                                                                                                                                                                                                                                                                                                                                                                                                                                                                                                                                                                                                                                                                                                                                                                                                                                                                                                                                                                                                                                                                                                                                                                                                                                                                                                                                                                                                                                                                                                                                                                                                                                                                                                                                                                                                                                                                                                                                                                                                                                                                                                                                                                                                                                                                                                                                                                                                                                                                                                                                                                                                                                                                                                                                                                                                                                                                    | Montana Public Health Laboratory                                                                               | Montana Public Health Laboratory                                                                                                   | Joy Ritter, Michelle Mozer, Carrie Biskupiak, Deborah Gibson                                                                                                                                                                                                                                                                                                                                                                                                             |                                                                                                                                                                                                                                                                                                                                                                                                                             |
| EPI_ISL_2023822                                                                                                                                                                                                                                                                                                                                                                                                                                                                                                                                                                                                                                                                                                                                                                                                                                                                                                                                                                                                                                                                                                                                                                                                                                                                                                                                                                                                                                                                                                                                                                                                                                                                                                                                                                                                                                                                                                                                                                                                                                                                                                                                                                                                                                                                                                                                                                                                                                                                                                                                                                                                                                                                                                                                                                                                                                                                                                                                                                                                                                                                                                                                                                    | Department of Virus and Microbiological Special Diagnostics, Statens Serum Institut, Copenhagen, Denmark       | Aalborg University                                                                                                                 | Danish Covid-19 Genome Consortium                                                                                                                                                                                                                                                                                                                                                                                                                                        |                                                                                                                                                                                                                                                                                                                                                                                                                             |
| EPI_ISL_2028280                                                                                                                                                                                                                                                                                                                                                                                                                                                                                                                                                                                                                                                                                                                                                                                                                                                                                                                                                                                                                                                                                                                                                                                                                                                                                                                                                                                                                                                                                                                                                                                                                                                                                                                                                                                                                                                                                                                                                                                                                                                                                                                                                                                                                                                                                                                                                                                                                                                                                                                                                                                                                                                                                                                                                                                                                                                                                                                                                                                                                                                                                                                                                                    | Laboratorio di Microbiologia                                                                                   | Laboratorio di Microbiologia                                                                                                       | Martineti Lucchini Gladys, Valeria Spina                                                                                                                                                                                                                                                                                                                                                                                                                                 |                                                                                                                                                                                                                                                                                                                                                                                                                             |
| EPI_ISL_2029148, EPI_ISL_2029149, EPI_ISL_2029203, EPI_ISL_2029204, EPI_ISL_2029330, EPI_ISL_2029331, EPI_ISL_2029332, EPI_ISL_2029333, EPI_ISL_2029334, EPI_ISL_2029335, EPI_ISL_2029336, EPI_ISL_2029337, EPI_ISL_2029338, EPI_ISL_2029339, EPI_ISL_2029340, EPI_ISL_2029341                                                                                                                                                                                                                                                                                                                                                                                                                                                                                                                                                                                                                                                                                                                                                                                                                                                                                                                                                                                                                                                                                                                                                                                                                                                                                                                                                                                                                                                                                                                                                                                                                                                                                                                                                                                                                                                                                                                                                                                                                                                                                                                                                                                                                                                                                                                                                                                                                                                                                                                                                                                                                                                                                                                                                                                                                                                                                                     | see above                                                                                                      | National Virus Reference Laboratory                                                                                                | Zoe Yandle, Charlene Bennett, Gabriel Gonzalez, Michael Carr, Jonathan Dean, Cillian F De Gascun                                                                                                                                                                                                                                                                                                                                                                         |                                                                                                                                                                                                                                                                                                                                                                                                                             |
| EPI_ISL_2029633                                                                                                                                                                                                                                                                                                                                                                                                                                                                                                                                                                                                                                                                                                                                                                                                                                                                                                                                                                                                                                                                                                                                                                                                                                                                                                                                                                                                                                                                                                                                                                                                                                                                                                                                                                                                                                                                                                                                                                                                                                                                                                                                                                                                                                                                                                                                                                                                                                                                                                                                                                                                                                                                                                                                                                                                                                                                                                                                                                                                                                                                                                                                                                    | Hospital                                                                                                       | National Reference Center for Viruses of Respiratory Infections, Institut Pasteur, Paris                                           | Marion Barbet, Sylvie Behillil, Méline Bizard, Angela Brisebarre, Camille Capel, Vincent Enouf, Louise Lefrançois, Frédéric Lemoine, Christophe Malabat, Corinne Mautrais, Etienne Simon-Lorière, Maud Vanpeene, Sylvie Van der Werf, Nabil Gastli                                                                                                                                                                                                                       |                                                                                                                                                                                                                                                                                                                                                                                                                             |
| EPI_ISL_2029828                                                                                                                                                                                                                                                                                                                                                                                                                                                                                                                                                                                                                                                                                                                                                                                                                                                                                                                                                                                                                                                                                                                                                                                                                                                                                                                                                                                                                                                                                                                                                                                                                                                                                                                                                                                                                                                                                                                                                                                                                                                                                                                                                                                                                                                                                                                                                                                                                                                                                                                                                                                                                                                                                                                                                                                                                                                                                                                                                                                                                                                                                                                                                                    | Hospital                                                                                                       | National Reference Center for Viruses of Respiratory Infections, Institut Pasteur, Paris                                           | Marion Barbet, Sylvie Behillil, Méline Bizard, Angela Brisebarre, Camille Capel, Vincent Enouf, Louise Lefrançois, Frédéric Lemoine, Christophe Malabat, Corinne Mautrais, Etienne Simon-Lorière, Maud Vanpeene, Sylvie Van der Werf, Victor Junqueira-Ferreira                                                                                                                                                                                                          |                                                                                                                                                                                                                                                                                                                                                                                                                             |
| EPI_ISL_2030971, EPI_ISL_2031155, EPI_ISL_2031160, EPI_ISL_2031178                                                                                                                                                                                                                                                                                                                                                                                                                                                                                                                                                                                                                                                                                                                                                                                                                                                                                                                                                                                                                                                                                                                                                                                                                                                                                                                                                                                                                                                                                                                                                                                                                                                                                                                                                                                                                                                                                                                                                                                                                                                                                                                                                                                                                                                                                                                                                                                                                                                                                                                                                                                                                                                                                                                                                                                                                                                                                                                                                                                                                                                                                                                 | Department of Virology and Immunology, University of Helsinki and Helsinki University Hospital, Huslab Finland | Department of Virology, Faculty of Medicine, University of Helsinki, Helsinki, Finland                                             | Teemu Smura, Ravi Kant, Phuoc Truong, Hussein Alburkat, Hannimari Kallio-Kokko, Jenni Virtanen, Maija Suvanto, Essi Korhonen, Sari Hannula, Harri Kangas, Hanna Liimatainen, Satu Kurkela, Hanna Jarva, Maija Lappalainen, Pekka Ellonen, Olli Vapalahti                                                                                                                                                                                                                 |                                                                                                                                                                                                                                                                                                                                                                                                                             |
| EPI_ISL_2032158                                                                                                                                                                                                                                                                                                                                                                                                                                                                                                                                                                                                                                                                                                                                                                                                                                                                                                                                                                                                                                                                                                                                                                                                                                                                                                                                                                                                                                                                                                                                                                                                                                                                                                                                                                                                                                                                                                                                                                                                                                                                                                                                                                                                                                                                                                                                                                                                                                                                                                                                                                                                                                                                                                                                                                                                                                                                                                                                                                                                                                                                                                                                                                    | Department of Public Health Microbiology Ljubljana, National Laboratory for Health, Environment and Food       | Department of Public Health Microbiology Ljubljana, National Laboratory for Health, Environment and Food                           | Tom Koritnik, José Gonçalves, Martin Bosilj, Katarina Proscenc, Metka Paragi, Verica Mio, Marija Trkov                                                                                                                                                                                                                                                                                                                                                                   |                                                                                                                                                                                                                                                                                                                                                                                                                             |
| EPI_ISL_2035536, EPI_ISL_2035630                                                                                                                                                                                                                                                                                                                                                                                                                                                                                                                                                                                                                                                                                                                                                                                                                                                                                                                                                                                                                                                                                                                                                                                                                                                                                                                                                                                                                                                                                                                                                                                                                                                                                                                                                                                                                                                                                                                                                                                                                                                                                                                                                                                                                                                                                                                                                                                                                                                                                                                                                                                                                                                                                                                                                                                                                                                                                                                                                                                                                                                                                                                                                   | Missouri State Public Health Laboratory                                                                        | Missouri State Public Health Laboratory                                                                                            | Matthew Sinn, Joshua Barry, Ashley New                                                                                                                                                                                                                                                                                                                                                                                                                                   |                                                                                                                                                                                                                                                                                                                                                                                                                             |
| EPI_ISL_2035951, EPI_ISL_2035961, EPI_ISL_2035979, EPI_ISL_2035980, EPI_ISL_2035981, EPI_ISL_2035982, EPI_ISL_2035983                                                                                                                                                                                                                                                                                                                                                                                                                                                                                                                                                                                                                                                                                                                                                                                                                                                                                                                                                                                                                                                                                                                                                                                                                                                                                                                                                                                                                                                                                                                                                                                                                                                                                                                                                                                                                                                                                                                                                                                                                                                                                                                                                                                                                                                                                                                                                                                                                                                                                                                                                                                                                                                                                                                                                                                                                                                                                                                                                                                                                                                              | Institute for Infectious Diseases, University of Bern, Switzerland                                             | Institute for Infectious Diseases, University of Bern, Switzerland                                                                 | Stefan Neuschwander, Christian Baumann, Miguel A Terrazos Miani, Cora Sägesser, Pascal Bittel, Peter Keller, Franziska Suter-Riniker, Stephen L Leib, Alban Ramette                                                                                                                                                                                                                                                                                                      |                                                                                                                                                                                                                                                                                                                                                                                                                             |
| EPI_ISL_2036080, EPI_ISL_2036090, EPI_ISL_2036270                                                                                                                                                                                                                                                                                                                                                                                                                                                                                                                                                                                                                                                                                                                                                                                                                                                                                                                                                                                                                                                                                                                                                                                                                                                                                                                                                                                                                                                                                                                                                                                                                                                                                                                                                                                                                                                                                                                                                                                                                                                                                                                                                                                                                                                                                                                                                                                                                                                                                                                                                                                                                                                                                                                                                                                                                                                                                                                                                                                                                                                                                                                                  | Centre de Recherches Médicales de Lambaréné (CERMEL)                                                           | Centre de Recherches Médicales de Lambaréné (CERMEL)                                                                               | Gédéon Prince Manouana, Moustapha Nzamba Maloum, Georgelin Nguerna Ondo, Rodrigue Bikangui, Samira Zoa Assoumou, Srinivas reddy Pallerla, Jean Bernard Lekana-Douki, Joël-Fleury Djoba Siawaya, Steffen Borrmann, Thirumalaisamy P. Velavan, Bertrand Leil and Ayola Akim Adegnikia                                                                                                                                                                                      |                                                                                                                                                                                                                                                                                                                                                                                                                             |
| EPI_ISL_2036369, EPI_ISL_2036489, EPI_ISL_2036585, EPI_ISL_2036698                                                                                                                                                                                                                                                                                                                                                                                                                                                                                                                                                                                                                                                                                                                                                                                                                                                                                                                                                                                                                                                                                                                                                                                                                                                                                                                                                                                                                                                                                                                                                                                                                                                                                                                                                                                                                                                                                                                                                                                                                                                                                                                                                                                                                                                                                                                                                                                                                                                                                                                                                                                                                                                                                                                                                                                                                                                                                                                                                                                                                                                                                                                 | MEPHI, Aix Marseille University                                                                                | MEPHI, Aix Marseille University                                                                                                    | Anthony LEVASSEUR                                                                                                                                                                                                                                                                                                                                                                                                                                                        |                                                                                                                                                                                                                                                                                                                                                                                                                             |



|                                                                                                      |                                                                                                                |                                                                                                                |                                                                                                                                                                                                                                                                                                                                                                                                                                                                                                                                                                                                                                                                                                                                                                                                                                                                                                                                                                                                                                                                                                                                                                                                                                                                                                                                                                                                                                                                                                                                                                                                                      |
|------------------------------------------------------------------------------------------------------|----------------------------------------------------------------------------------------------------------------|----------------------------------------------------------------------------------------------------------------|----------------------------------------------------------------------------------------------------------------------------------------------------------------------------------------------------------------------------------------------------------------------------------------------------------------------------------------------------------------------------------------------------------------------------------------------------------------------------------------------------------------------------------------------------------------------------------------------------------------------------------------------------------------------------------------------------------------------------------------------------------------------------------------------------------------------------------------------------------------------------------------------------------------------------------------------------------------------------------------------------------------------------------------------------------------------------------------------------------------------------------------------------------------------------------------------------------------------------------------------------------------------------------------------------------------------------------------------------------------------------------------------------------------------------------------------------------------------------------------------------------------------------------------------------------------------------------------------------------------------|
| EPI_ISL_2037097, EPI_ISL_2037361, EPI_ISL_2037372, EPI_ISL_2037386, EPI_ISL_2037387                  | Pandemic Response Lab - NYC                                                                                    | Pandemic Response Lab, R&D                                                                                     | Henry Lee, Michael Hammerling, Melissa Hopkins, Cybill del Castillo, Shinyoung Clair Kang, William Ward, Pradeep Bugga, Sol Rey, Dylan Law, Katharine Nelson, Haiping Hao, Jon Laurent                                                                                                                                                                                                                                                                                                                                                                                                                                                                                                                                                                                                                                                                                                                                                                                                                                                                                                                                                                                                                                                                                                                                                                                                                                                                                                                                                                                                                               |
| EPI_ISL_2080235                                                                                      | Simple Laboratories                                                                                            | Gagnon Lab, Southern Illinois University                                                                       | Keith Gagnon                                                                                                                                                                                                                                                                                                                                                                                                                                                                                                                                                                                                                                                                                                                                                                                                                                                                                                                                                                                                                                                                                                                                                                                                                                                                                                                                                                                                                                                                                                                                                                                                         |
| EPI_ISL_2080362, EPI_ISL_2080386                                                                     | Health Services Laboratories                                                                                   | Wellcome Sanger Institute for the COVID-19 Genomics UK (COG-UK) Consortium                                     | Health Services Laboratories and Alex Alderton, Roberto Amato, Jeffrey Barrett, Sonia Goncalves, Ewan Harrison, David K. Jackson, Ian Johnston, Dominic Kwiatkowski, Cordelia Langford, John Sillitoe on behalf of the Wellcome Sanger Institute COVID-19 Surveillance Team                                                                                                                                                                                                                                                                                                                                                                                                                                                                                                                                                                                                                                                                                                                                                                                                                                                                                                                                                                                                                                                                                                                                                                                                                                                                                                                                          |
| EPI_ISL_2080944, EPI_ISL_2080952, EPI_ISL_2080953, EPI_ISL_2080971                                   | Institute for Infectious Diseases, University of Bern, Switzerland                                             | Institute for Infectious Diseases, University of Bern, Switzerland                                             | Stefan Neuwenschwander, Christian Baumann, Miguel A Terrazos Miani, Cora Sägesser, Pascal Bittel, Peter Keller, Franziska Suter-Riniker, Stephen L Leib, Alban Ramette                                                                                                                                                                                                                                                                                                                                                                                                                                                                                                                                                                                                                                                                                                                                                                                                                                                                                                                                                                                                                                                                                                                                                                                                                                                                                                                                                                                                                                               |
| EPI_ISL_2081664, EPI_ISL_2081665                                                                     | Servicio de Microbiología. Consorcio Hospital General Universitario de Valencia                                | SeqCOVID-SPAIN consortium/IBV(CSIC)                                                                            | María Dolores Ocete, Begoña Fuster Escrivá, Carme Salvador García, Rafael Medina González, Concepción Gimeno Cardona and SeqCOVID-SPAIN consortium                                                                                                                                                                                                                                                                                                                                                                                                                                                                                                                                                                                                                                                                                                                                                                                                                                                                                                                                                                                                                                                                                                                                                                                                                                                                                                                                                                                                                                                                   |
| EPI_ISL_2082497                                                                                      | UW Virology Lab                                                                                                | UW Virology Lab                                                                                                | Pavitra Roychoudhury, Hong Xie, Lasata Shrestha, Tien V. Nguyen, Shah Mohamed Bakhsh, Michelle Lin, Noah R. Baker, Sean Ellis, Meei-Li Huang, Keith R Jerome, Alexander Greninger                                                                                                                                                                                                                                                                                                                                                                                                                                                                                                                                                                                                                                                                                                                                                                                                                                                                                                                                                                                                                                                                                                                                                                                                                                                                                                                                                                                                                                    |
| EPI_ISL_2082897                                                                                      | Maryland Genomics, Institute for Genome Sciences, University of Maryland School of Medicine                    | Maryland Genomics, Institute for Genome Sciences, University of Maryland School of Medicine                    | Tallon, Luke J; Sadzewicz, Lisa D; Humphrys, Mike; Ott, Sandra; Roussey, Holly; Mehta, Aditya; Vavikolanu, Kranthi; Fraser, Claire M; Ravel, Jacques                                                                                                                                                                                                                                                                                                                                                                                                                                                                                                                                                                                                                                                                                                                                                                                                                                                                                                                                                                                                                                                                                                                                                                                                                                                                                                                                                                                                                                                                 |
| EPI_ISL_2082935                                                                                      | Nigeria Centre for Disease Control (NCDC)                                                                      | African Centre of Excellence for Genomics of Infectious Diseases (ACEGID), Redeemer's University               | Olawoye, I.B., Oluniyi, P.E., Eromon, P.E., Oguzie, J.U., Kayode, A.T., Uwanibe, J.N., Ugwu, C.A., Akano, K.O., Ajogbasile, F.V., Abechi, P.S., Olumade, T.J., Nosamiefan, I., Folarin, O., Happi, C.T.                                                                                                                                                                                                                                                                                                                                                                                                                                                                                                                                                                                                                                                                                                                                                                                                                                                                                                                                                                                                                                                                                                                                                                                                                                                                                                                                                                                                              |
| EPI_ISL_2088360, EPI_ISL_2088375                                                                     | National Virus Reference Laboratory                                                                            | National Virus Reference Laboratory                                                                            | Zoe Yandle, Charlene Bennett, Gabriel Gonzalez, Michael Carr, Jonathan Dean, Cillian F De Gascun                                                                                                                                                                                                                                                                                                                                                                                                                                                                                                                                                                                                                                                                                                                                                                                                                                                                                                                                                                                                                                                                                                                                                                                                                                                                                                                                                                                                                                                                                                                     |
| EPI_ISL_2091913, EPI_ISL_2091938                                                                     | Lighthouse Lab in Milton Keynes                                                                                | Wellcome Sanger Institute for the COVID-19 Genomics UK (COG-UK) Consortium                                     | The Lighthouse Lab in Milton Keynes and Alex Alderton, Roberto Amato, Jeffrey Barrett, Sonia Goncalves, Ewan Harrison, David K. Jackson, Ian Johnston, Dominic Kwiatkowski, Cordelia Langford, John Sillitoe on behalf of the Wellcome Sanger Institute COVID-19 Surveillance Team                                                                                                                                                                                                                                                                                                                                                                                                                                                                                                                                                                                                                                                                                                                                                                                                                                                                                                                                                                                                                                                                                                                                                                                                                                                                                                                                   |
| EPI_ISL_2092344, EPI_ISL_2092587                                                                     | Lighthouse Lab in Alderley Park                                                                                | Wellcome Sanger Institute for the COVID-19 Genomics UK (COG-UK) Consortium                                     | Jacquelyn Wynn, Mairead Hyland, The Lighthouse Lab in Alderley Park and Alex Alderton, Roberto Amato, Jeffrey Barrett, Sonia Goncalves, Ewan Harrison, David K. Jackson, Ian Johnston, Dominic Kwiatkowski, Cordelia Langford, John Sillitoe on behalf of the Wellcome Sanger Institute COVID-19 Surveillance Team                                                                                                                                                                                                                                                                                                                                                                                                                                                                                                                                                                                                                                                                                                                                                                                                                                                                                                                                                                                                                                                                                                                                                                                                                                                                                                   |
| EPI_ISL_2093798                                                                                      | Dutch COVID-19 response team                                                                                   | National Institute for Public Health and the Environment (RIVM)                                                | Adam Meijer, Harry Vennema, Dirk Eggink, Jeroen Cremer, Sharon van den Brink, Bas van der Veer, AnneMarie van den Brandt, Lisa Wijsman, Kim Freriks, Rianne Jaarsma, Eunice Then, Lynn Aarts, Sanne Bos, Melissa van Tuil, Linda van de Nes, Sjoerd Kuiling, James Groot, Florian Zwagemaker, Dennis Schmitz, Annelies Kroneman, Karim Hajji, Chantal Reusken, on behalf of the national COVID-19 response team                                                                                                                                                                                                                                                                                                                                                                                                                                                                                                                                                                                                                                                                                                                                                                                                                                                                                                                                                                                                                                                                                                                                                                                                      |
| EPI_ISL_2095040, EPI_ISL_2095041, EPI_ISL_2095042, EPI_ISL_2095043, EPI_ISL_2095044, EPI_ISL_2095277 | Max von Pettenkofer Institute, Virology, National Reference Center for Retroviruses, LMU Munich                | Laboratory for Functional Genome Analysis; Dept. Genomics; Gene Center of the LMU Munich                       | Max Muenchhoff; Stefan Krebs; Alexander Graf; Oliver Keppler; Helmut Blum                                                                                                                                                                                                                                                                                                                                                                                                                                                                                                                                                                                                                                                                                                                                                                                                                                                                                                                                                                                                                                                                                                                                                                                                                                                                                                                                                                                                                                                                                                                                            |
| EPI_ISL_2096559                                                                                      | Broad Institute Clinical Research Sequencing Platform                                                          | Infectious Disease Program, Broad Institute of Harvard and MIT                                                 | Siddle,K.J., Adams,G., Pearlman,L., Gladden-Young,A., Vicente,G., Blumenstiel,B., DeFelice,M., Lee,M., McGovern,S., Lagerberg,K., Rudy,M., DeRuff,K., Carter,A., Normandin,E., Bauer,M., Reilly,S., Tomkins-Tinch,C., Loreth,C., Chaluvadi,S., Meldrim,J., Granger,B., Lemieux,J.E., Birren,B.W., Sabeti,P.C., Larkin,K., Dodge,S., Lennon,N., Madoff,L., Brown,C., Gallagher,G., Smole,S., Park,D.J., Gabriel,S., and MacInnis,B.L.                                                                                                                                                                                                                                                                                                                                                                                                                                                                                                                                                                                                                                                                                                                                                                                                                                                                                                                                                                                                                                                                                                                                                                                 |
| EPI_ISL_2097220, EPI_ISL_2097221, EPI_ISL_2097222, EPI_ISL_2097230, EPI_ISL_2097231                  | Centre de Recherches Médicales de Lambaréné (CERMEL)                                                           | Centre de Recherches Médicales de Lambaréné (CERMEL)                                                           | Gédéon Prince Manouana, Moustapha Nzamba Maloum, Sam O'neilla Oye Bingono, Georlin Nguema Ondo, Rodrigue Bikangui, Samira Zoa Assoumou, Srinivas reddy Pallerla, Jean Bernard Lekana-Douki, Joël-Fleury Djoba Siawaya, Steffen Borrmann, Thirumalaisamy P. Velavan, Bertrand Leli and Ayola Akim Adegnika                                                                                                                                                                                                                                                                                                                                                                                                                                                                                                                                                                                                                                                                                                                                                                                                                                                                                                                                                                                                                                                                                                                                                                                                                                                                                                            |
| EPI_ISL_2098808                                                                                      | Clinical Molecular Microbiology Laboratory, UNC Hospitals                                                      | Jeremy Wang                                                                                                    | Jeremy Wang, Alexander Rubinsteyn, Colleen Rice, Jose Luis Torres Castillo, Brianna de la Houssaye, Jason Smedberg, Shawn Hawken, Melissa Miller, Corbin Jones, Robert Hagan                                                                                                                                                                                                                                                                                                                                                                                                                                                                                                                                                                                                                                                                                                                                                                                                                                                                                                                                                                                                                                                                                                                                                                                                                                                                                                                                                                                                                                         |
| EPI_ISL_2098914                                                                                      | Servicio de Microbiología. Hospital Clínico Universitario de Valencia                                          | SeqCOVID-SPAIN consortium/IBV(CSIC)                                                                            | David Navarro Ortega, Eliseo Albert Vicent, Ignacio Torres and SeqCOVID-SPAIN consortium                                                                                                                                                                                                                                                                                                                                                                                                                                                                                                                                                                                                                                                                                                                                                                                                                                                                                                                                                                                                                                                                                                                                                                                                                                                                                                                                                                                                                                                                                                                             |
| EPI_ISL_2100238                                                                                      | Laboratory of Clinical Microbiology, Virology and Bioemergencies, ASST Fatebenefratelli Sacco - Sacco Hospital | Laboratory of Clinical Microbiology, Virology and Bioemergencies, ASST Fatebenefratelli Sacco - Sacco Hospital | Valeria Micheli, Alessandro Mancon, Alberto Rizzo, Fiorenza Bracchitta, Luca Rizzuto, Maria Rita Gismondo                                                                                                                                                                                                                                                                                                                                                                                                                                                                                                                                                                                                                                                                                                                                                                                                                                                                                                                                                                                                                                                                                                                                                                                                                                                                                                                                                                                                                                                                                                            |
| EPI_ISL_2102754                                                                                      | CA DPH Viral and Rickettsial Disease Laboratory                                                                | Chan-Zuckerberg Biohub                                                                                         | CZB Cllahub Consortium                                                                                                                                                                                                                                                                                                                                                                                                                                                                                                                                                                                                                                                                                                                                                                                                                                                                                                                                                                                                                                                                                                                                                                                                                                                                                                                                                                                                                                                                                                                                                                                               |
| EPI_ISL_2102820, EPI_ISL_2102844, EPI_ISL_2102902, EPI_ISL_2102998, EPI_ISL_2103172                  | County of San Luis Obispo Public Health Laboratory                                                             | Chan-Zuckerberg Biohub                                                                                         | CZB Cllahub Consortium                                                                                                                                                                                                                                                                                                                                                                                                                                                                                                                                                                                                                                                                                                                                                                                                                                                                                                                                                                                                                                                                                                                                                                                                                                                                                                                                                                                                                                                                                                                                                                                               |
| EPI_ISL_2105675                                                                                      | HOSPITAL GERAL JESUS TEIXEIRA DA COSTA GUAIANASES SAO PAULO                                                    | Instituto Butantan / ESALQ-Piracicaba                                                                          | Instituto Butantan: Dimas Tadeu Covas, Sandra Coccuzzo Sampaio, Maria Carolina Elias, José Salvatore Leister Patané, Vincent Louis Viala, Antonio Jorge Martins, Ricardo Haddad, Claudia Renata dos Santos Barros, Elaine Cristina Marqueze, Raul Machado Neto, Debora Botequiao Moretti, Jardelina de Souza Todao Bernardino, Loyze Paola Oliveira de Lima, Luiz Aurelio de Campos Crispin. Centro de Genômica Funcional da ESALQ: Luiz Lehmann Coutinho, Ricardo Augusto Brassaloti, Raquel de Lello Rocha Campos Cassano. NGS Soluções Genômicas: Pilar Drummond Sampaio Corrêa Mariani. FZEA-USP Pirassununga: Mirele Daiana Poleti, Jessika Cristina Chagas Lesbon, Elisângela Chicaroni Mattos, Heidge Fukumasu. USP-Botucatu: Rejane Maria Tommasini Grotto, Jayme A. Souza-Neto, Guilherme Targino Valente, Patricia Akemi Assato, Felipe Allan da Silva da Costa, Bianca Cechetto Carlos. Mendelics: Bibiana Santos, João Paulo Kitajima, Erika Freitas, David Schlesinger. Hemocentro Ribeirão Preto: Simone Kashima, Evandra Strazza Rodrigues, Svetoslav Nanev Slavov, Elaine Vieira dos Santos, Rafael dos Santos Bezerra, Luiz Carlos Junior de Alcantara, Marta Giovanetti, Vagner Fonseca, Flavia Aburjaile, Rodrigo Tocantins Calado. FAMERP-SJRP: Cecília Artico Banho, Livia Sacchetto, Fábio Sossai Possebon, Leila Sabrina Ullmann, Cintia Bittar, Guilherme Campos, Helena Lage Ferreira, Jorge A. Petrolí Marchesi, Maisa C. Pereira Parra, Marília Moraes, Paula Rahal, Paulo Inacio da Costa, João Pessoa Araújo Jr., Mauricio Lacerda Nogueira. Prefeitura de Sao Paulo: Melissa Palmieri. |
| EPI_ISL_2105676                                                                                      | HOSP MUN DE MOGI DAS CRUZES PREF WALDEMAR COSTA FILHO                                                          | Instituto Butantan / Mendelics                                                                                 | Instituto Butantan: Dimas Tadeu Covas, Sandra Coccuzzo Sampaio, Maria Carolina Elias, José Salvatore Leister Patané, Vincent Louis Viala, Antonio Jorge Martins, Ricardo Haddad, Claudia Renata dos Santos Barros, Elaine Cristina Marqueze, Raul Machado Neto, Debora Botequiao Moretti, Jardelina de Souza Todao Bernardino, Loyze Paola Oliveira de Lima, Luiz Aurelio de Campos Crispin. Centro de Genômica Funcional da ESALQ: Luiz Lehmann Coutinho, Ricardo Augusto Brassaloti, Raquel de Lello Rocha Campos Cassano. NGS Soluções Genômicas: Pilar Drummond Sampaio Corrêa Mariani. FZEA-USP Pirassununga: Mirele Daiana Poleti, Jessika Cristina Chagas Lesbon, Elisângela Chicaroni Mattos, Heidge Fukumasu. USP-Botucatu: Rejane Maria Tommasini Grotto, Jayme A. Souza-Neto, Guilherme Targino Valente, Patricia Akemi Assato, Felipe Allan da Silva da Costa, Bianca Cechetto Carlos. Mendelics: Bibiana Santos, João Paulo Kitajima, Erika Freitas, David Schlesinger. Hemocentro Ribeirão Preto: Simone Kashima, Evandra Strazza Rodrigues, Svetoslav Nanev Slavov, Elaine Vieira dos Santos, Rafael dos Santos Bezerra, Luiz Carlos Junior de Alcantara, Marta Giovanetti, Vagner Fonseca, Flavia Aburjaile, Rodrigo Tocantins Calado. FAMERP-SJRP: Cecília Artico Banho, Livia Sacchetto, Fábio Sossai Possebon, Leila Sabrina Ullmann, Cintia Bittar, Guilherme Campos, Helena Lage Ferreira, Jorge A. Petrolí Marchesi, Maisa C. Pereira Parra, Marília Moraes, Paula Rahal, Paulo Inacio da Costa, João Pessoa Araújo Jr., Mauricio Lacerda Nogueira. Prefeitura de Sao Paulo: Melissa Palmieri. |
| EPI_ISL_2106418                                                                                      | Pandemic Response Lab - NYC                                                                                    | Pandemic Response Lab, R&D                                                                                     | Henry Lee, Michael Hammerling, Melissa Hopkins, Cybill del Castillo, Shinyoung Clair Kang, William Ward, Pradeep Bugga, Sol Rey, Dylan Law, Katharine Nelson, Haiping Hao, Jon Laurent                                                                                                                                                                                                                                                                                                                                                                                                                                                                                                                                                                                                                                                                                                                                                                                                                                                                                                                                                                                                                                                                                                                                                                                                                                                                                                                                                                                                                               |
| EPI_ISL_2107307, EPI_ISL_2107309, EPI_ISL_2107312, EPI_ISL_2107313, EPI_ISL_2107317, EPI_ISL_2107318 | Ministry of Health Turkey                                                                                      | Ministry of Health Turkey                                                                                      | Fatma Bayraktar, Yasemin Cosgun, Suleyman Yalcin, Gulay Korukluoglu                                                                                                                                                                                                                                                                                                                                                                                                                                                                                                                                                                                                                                                                                                                                                                                                                                                                                                                                                                                                                                                                                                                                                                                                                                                                                                                                                                                                                                                                                                                                                  |
| EPI_ISL_2111148                                                                                      | Laborarztpraxis Dres. med. Walther Weindel & Kollegen                                                          | Robert Koch Institute                                                                                          | unknown                                                                                                                                                                                                                                                                                                                                                                                                                                                                                                                                                                                                                                                                                                                                                                                                                                                                                                                                                                                                                                                                                                                                                                                                                                                                                                                                                                                                                                                                                                                                                                                                              |
| EPI_ISL_2112745                                                                                      | Corona-Testzentrum ifp Institut für Produktqualität GmbH                                                       | Robert Koch Institute                                                                                          | unknown                                                                                                                                                                                                                                                                                                                                                                                                                                                                                                                                                                                                                                                                                                                                                                                                                                                                                                                                                                                                                                                                                                                                                                                                                                                                                                                                                                                                                                                                                                                                                                                                              |

|                                                                                                                                                                                                                                                                                                                                                                                                                                                                                                                                                                                                                                                                                                        |                                                                                                                            |                                                                                                         |                                                                                                                                                                                                                                                                                                                                                                                                                                                                                                       |
|--------------------------------------------------------------------------------------------------------------------------------------------------------------------------------------------------------------------------------------------------------------------------------------------------------------------------------------------------------------------------------------------------------------------------------------------------------------------------------------------------------------------------------------------------------------------------------------------------------------------------------------------------------------------------------------------------------|----------------------------------------------------------------------------------------------------------------------------|---------------------------------------------------------------------------------------------------------|-------------------------------------------------------------------------------------------------------------------------------------------------------------------------------------------------------------------------------------------------------------------------------------------------------------------------------------------------------------------------------------------------------------------------------------------------------------------------------------------------------|
| EPI_ISL_2117793, EPI_ISL_2118229                                                                                                                                                                                                                                                                                                                                                                                                                                                                                                                                                                                                                                                                       | Lighthouse Lab in Milton Keynes                                                                                            | Wellcome Sanger Institute for the COVID-19 Genomics UK (COG-UK) Consortium                              | The Lighthouse Lab in Milton Keynes and Alex Alderton, Roberto Amato, Jeffrey Barrett, Sonia Goncalves, Ewan Harrison, David K. Jackson, Ian Johnston, Dominic Kwiatkowski, Cordelia Langford, John Sillitoe on behalf of the Wellcome Sanger Institute COVID-19 Surveillance Team                                                                                                                                                                                                                    |
| EPI_ISL_2118634                                                                                                                                                                                                                                                                                                                                                                                                                                                                                                                                                                                                                                                                                        | Lighthouse Lab in Alderley Park                                                                                            | Wellcome Sanger Institute for the COVID-19 Genomics UK (COG-UK) Consortium                              | Jacquelyn Wynn, Mairead Hyland, The Lighthouse Lab in Alderley Park and Alex Alderton, Roberto Amato, Jeffrey Barrett, Sonia Goncalves, Ewan Harrison, David K. Jackson, Ian Johnston, Dominic Kwiatkowski, Cordelia Langford, John Sillitoe on behalf of the Wellcome Sanger Institute COVID-19 Surveillance Team                                                                                                                                                                                    |
| EPI_ISL_2119319, EPI_ISL_2119381, EPI_ISL_2120143, EPI_ISL_2120189                                                                                                                                                                                                                                                                                                                                                                                                                                                                                                                                                                                                                                     | Lighthouse Lab in Milton Keynes                                                                                            | Wellcome Sanger Institute for the COVID-19 Genomics UK (COG-UK) Consortium                              | The Lighthouse Lab in Milton Keynes and Alex Alderton, Roberto Amato, Jeffrey Barrett, Sonia Goncalves, Ewan Harrison, David K. Jackson, Ian Johnston, Dominic Kwiatkowski, Cordelia Langford, John Sillitoe on behalf of the Wellcome Sanger Institute COVID-19 Surveillance Team                                                                                                                                                                                                                    |
| EPI_ISL_2120977                                                                                                                                                                                                                                                                                                                                                                                                                                                                                                                                                                                                                                                                                        | Lighthouse Lab in Alderley Park                                                                                            | Wellcome Sanger Institute for the COVID-19 Genomics UK (COG-UK) Consortium                              | Jacquelyn Wynn, Mairead Hyland, The Lighthouse Lab in Alderley Park and Alex Alderton, Roberto Amato, Jeffrey Barrett, Sonia Goncalves, Ewan Harrison, David K. Jackson, Ian Johnston, Dominic Kwiatkowski, Cordelia Langford, John Sillitoe on behalf of the Wellcome Sanger Institute COVID-19 Surveillance Team                                                                                                                                                                                    |
| EPI_ISL_2121714                                                                                                                                                                                                                                                                                                                                                                                                                                                                                                                                                                                                                                                                                        | Lighthouse Lab in Milton Keynes                                                                                            | Wellcome Sanger Institute for the COVID-19 Genomics UK (COG-UK) Consortium                              | The Lighthouse Lab in Milton Keynes and Alex Alderton, Roberto Amato, Jeffrey Barrett, Sonia Goncalves, Ewan Harrison, David K. Jackson, Ian Johnston, Dominic Kwiatkowski, Cordelia Langford, John Sillitoe on behalf of the Wellcome Sanger Institute COVID-19 Surveillance Team                                                                                                                                                                                                                    |
| EPI_ISL_2128225, EPI_ISL_2128231, EPI_ISL_2128233, EPI_ISL_2128234, EPI_ISL_2128236                                                                                                                                                                                                                                                                                                                                                                                                                                                                                                                                                                                                                    | Centre for Enzyme Innovation, University of Portsmouth / Translational Research Laboratory, Portsmouth Hospitals NHS Trust | COVID-19 Genomics UK (COG-UK) Consortium                                                                | Angela Beckett, Salman Goudarzi, Christopher Fearn, Kate Cook, Katie Loveson, Sharon Glaysheer, Scott Elliott, Samuel Robson                                                                                                                                                                                                                                                                                                                                                                          |
| EPI_ISL_2129502                                                                                                                                                                                                                                                                                                                                                                                                                                                                                                                                                                                                                                                                                        | Limbach - MVZ Humangenetik Ulm                                                                                             | Robert Koch Institute                                                                                   | unknown                                                                                                                                                                                                                                                                                                                                                                                                                                                                                               |
| EPI_ISL_2131656, EPI_ISL_2131657                                                                                                                                                                                                                                                                                                                                                                                                                                                                                                                                                                                                                                                                       | SARS-CoV-2 testing team, National Institute of Infectious Diseases                                                         | Pathogen Genomics Center, National Institute of Infectious Diseases                                     | Tsuyoshi Sekizuka, Kentaro Itokawa, Rina Tanaka, Masanori Hashino, Nozomu Hanaoka, Masumichi Saito, Naomi Nojiri, Hazuka Y Furihata, Sana Uchikoba, Tsugoto Fujimoto, Makoto Kuroda                                                                                                                                                                                                                                                                                                                   |
| EPI_ISL_2131848, EPI_ISL_2131866, EPI_ISL_2131869, EPI_ISL_2131882, EPI_ISL_2131895, EPI_ISL_2131953, EPI_ISL_2132014, EPI_ISL_2132037, EPI_ISL_2132041, EPI_ISL_2132057, EPI_ISL_2132058, EPI_ISL_2132065, EPI_ISL_2132067, EPI_ISL_2132068, EPI_ISL_2132069, EPI_ISL_2132088, EPI_ISL_2132144, EPI_ISL_2132145                                                                                                                                                                                                                                                                                                                                                                                       |                                                                                                                            |                                                                                                         |                                                                                                                                                                                                                                                                                                                                                                                                                                                                                                       |
| see above                                                                                                                                                                                                                                                                                                                                                                                                                                                                                                                                                                                                                                                                                              | National Virus Reference Laboratory                                                                                        | National Virus Reference Laboratory                                                                     | Zoe Yandle, Charlene Bennett, Gabriel Gonzalez, Michael Carr, Jonathan Dean, Cillian F De Gascun                                                                                                                                                                                                                                                                                                                                                                                                      |
| EPI_ISL_2133085, EPI_ISL_2133086, EPI_ISL_2133087, EPI_ISL_2133088                                                                                                                                                                                                                                                                                                                                                                                                                                                                                                                                                                                                                                     | NCDC                                                                                                                       | National Reference Laboratory, Nigeria Centre for Disease Control                                       | Dr Ndodo Nnaemeka, Olusola Anuoluwapo Akanbi, Chimaobi Chukwu, Dr Omoare Adesuyi, Grace Esebanmen, Kingsley Madubuike, Anthony Ahumibe, Catherine Okoi, Naidoo Dhamari, Nwando Mba, Dr Chikwe Ihekweazu                                                                                                                                                                                                                                                                                               |
| EPI_ISL_2134830, EPI_ISL_2134866                                                                                                                                                                                                                                                                                                                                                                                                                                                                                                                                                                                                                                                                       | Viollier AG                                                                                                                | Viollier AG                                                                                             | Andrea Patrizia Salzmann, Henriette Kurth, Christiane Beckmann, Maurice Redondo, Olivier Kobel, Christoph Noppen                                                                                                                                                                                                                                                                                                                                                                                      |
| EPI_ISL_2135001                                                                                                                                                                                                                                                                                                                                                                                                                                                                                                                                                                                                                                                                                        | Texas Children's Hospital                                                                                                  | Texas Children's Microbiome Center                                                                      | Ruth Ann Luna, Jennifer K. Spinler, James Dunn, James Versalovic, Ila Singh                                                                                                                                                                                                                                                                                                                                                                                                                           |
| EPI_ISL_2135081                                                                                                                                                                                                                                                                                                                                                                                                                                                                                                                                                                                                                                                                                        | Illinois Department of Public Health - Springfield Lab                                                                     | Illinois Department of Public Health - Springfield Lab                                                  | Bryan Sim, Gordon McCall                                                                                                                                                                                                                                                                                                                                                                                                                                                                              |
| EPI_ISL_2135147, EPI_ISL_2135154, EPI_ISL_2135155, EPI_ISL_2135157, EPI_ISL_2135159, EPI_ISL_2135161, EPI_ISL_2135169, EPI_ISL_2135170                                                                                                                                                                                                                                                                                                                                                                                                                                                                                                                                                                 | Servicio Virosis Respiratorias-Departamento Virologia-INEI                                                                 | Instituto Nacional Enfermedades Infecciosas C.G.Malbran                                                 | Baumeister E., Avaro M., Benedetti E., Russo M., Dattero ME, Pontoriero A., Cisterna D., Molina V., Perandones C., Tuduri E., Lorenzo F., Poklepovich T., Campos J.                                                                                                                                                                                                                                                                                                                                   |
| EPI_ISL_2137158                                                                                                                                                                                                                                                                                                                                                                                                                                                                                                                                                                                                                                                                                        | Institute for Water Quality and Resource Management, Technical University Vienna                                           | Berghthaler laboratory, CeMM Research Center for Molecular Medicine of the Austrian Academy of Sciences | Lukas Ender, Anna Schedl, Fabian Amman, Petr Triska, Thomas Penz, Benedikt Agerer, Maelle Le Moing, Michael Schuster, Bekir Erguner, Jan Laine, Martin Senekowitsch, Christoph Bock, Andreas Berghthaler                                                                                                                                                                                                                                                                                              |
| EPI_ISL_2138981, EPI_ISL_2138991, EPI_ISL_2139008, EPI_ISL_2139009, EPI_ISL_2139010, EPI_ISL_2139101, EPI_ISL_2139103, EPI_ISL_2139106, EPI_ISL_2139110, EPI_ISL_2139114, EPI_ISL_2139211, EPI_ISL_2139241, EPI_ISL_2139243, EPI_ISL_2139249, EPI_ISL_2139252, EPI_ISL_2139253, EPI_ISL_2139256, EPI_ISL_2139261, EPI_ISL_2139268, EPI_ISL_2139270, EPI_ISL_2139276, EPI_ISL_2139280, EPI_ISL_2139287, EPI_ISL_2139304, EPI_ISL_2139310, EPI_ISL_2139325, EPI_ISL_2139326, EPI_ISL_2139333, EPI_ISL_2139341, EPI_ISL_2139342, EPI_ISL_2139349, EPI_ISL_2139352, EPI_ISL_2139354, EPI_ISL_2139356, EPI_ISL_2139389, EPI_ISL_2139402, EPI_ISL_2139443, EPI_ISL_2139465, EPI_ISL_2139466, EPI_ISL_2139481 |                                                                                                                            |                                                                                                         |                                                                                                                                                                                                                                                                                                                                                                                                                                                                                                       |
| see above                                                                                                                                                                                                                                                                                                                                                                                                                                                                                                                                                                                                                                                                                              | Public Health Ontario Laboratory                                                                                           | Public Health Ontario Laboratory                                                                        | Vanessa G Allen, Philip Banh, Yao Chen, Richard de Borja, Alireza Eshaghi, Nahuel Fittipaldi, Christine Frantz, Jonathan B Gubbay, Jennifer L Guthrie, Lawrence Heisler, Esha Joshi, Michael Laszloffy, Aimin Li, Michael CY Li, Dean Maxwell, Sandeep Nagra, Samir N Patel, Jared Simpson, Karthikeyan Sivaraman, Ashleigh Sullivan, Yogi Sundaravadanam, Sarah Teatero, Andre Villegas, Matthew Watson, Sandra Zittermann                                                                           |
| EPI_ISL_2139568, EPI_ISL_2139569, EPI_ISL_2139570, EPI_ISL_2139571, EPI_ISL_2139572                                                                                                                                                                                                                                                                                                                                                                                                                                                                                                                                                                                                                    | Ministry of Health Turkey                                                                                                  | Ministry of Health Turkey                                                                               | Fatma Bayraktar, Yasemin Cosgun, Suleyman Yalcin, Gulay Korukluoglu                                                                                                                                                                                                                                                                                                                                                                                                                                   |
| EPI_ISL_2140920, EPI_ISL_2141127, EPI_ISL_2141128, EPI_ISL_2141129, EPI_ISL_2141130, EPI_ISL_2141131, EPI_ISL_2141132, EPI_ISL_2141133, EPI_ISL_2141134, EPI_ISL_2141135, EPI_ISL_2141136, EPI_ISL_2141137, EPI_ISL_2141138, EPI_ISL_2141139, EPI_ISL_2141140, EPI_ISL_2141141, EPI_ISL_2141142, EPI_ISL_2141176, EPI_ISL_2141180, EPI_ISL_2141183, EPI_ISL_2141191                                                                                                                                                                                                                                                                                                                                    |                                                                                                                            |                                                                                                         |                                                                                                                                                                                                                                                                                                                                                                                                                                                                                                       |
| see above                                                                                                                                                                                                                                                                                                                                                                                                                                                                                                                                                                                                                                                                                              | Public Health Ontario Laboratory                                                                                           | Public Health Ontario Laboratory                                                                        | Vanessa G Allen, Philip Banh, Yao Chen, Richard de Borja, Alireza Eshaghi, Nahuel Fittipaldi, Christine Frantz, Jonathan B Gubbay, Jennifer L Guthrie, Lawrence Heisler, Esha Joshi, Michael Laszloffy, Aimin Li, Michael CY Li, Dean Maxwell, Sandeep Nagra, Samir N Patel, Jared Simpson, Karthikeyan Sivaraman, Ashleigh Sullivan, Yogi Sundaravadanam, Sarah Teatero, Andre Villegas, Matthew Watson, Sandra Zittermann                                                                           |
| EPI_ISL_2141773                                                                                                                                                                                                                                                                                                                                                                                                                                                                                                                                                                                                                                                                                        | LIC                                                                                                                        | Latvian Biomedical Research and Study Centre                                                            | Janis Pjalkovskis, Nikita Zrelavs, Monta Ustinova, Ivars Silamikelis, Liga Birzniece, Kaspars Megris, Una Krumina, Guntars Zarins, Vita Rovite, Lauma Freimane, Laila Silamikele, Laura Ansona, Davids Fridmanis, Elina Dimina, Reinis Zeltmatis, Diana Dusacka, Juris Perevoscikovs, Uga Dumpis, Janis Klovins                                                                                                                                                                                       |
| EPI_ISL_2142642                                                                                                                                                                                                                                                                                                                                                                                                                                                                                                                                                                                                                                                                                        | HOPITAL BERGERAC                                                                                                           | CNR Virus des Infections Respiratoires - France SUD                                                     | Antonin Bal, Gregory Destras, Gwendolynne Burfin, Hadrien Regue, Quentin Semanas, Martine Valette, Bruno Lina, Laurence Josset                                                                                                                                                                                                                                                                                                                                                                        |
| EPI_ISL_2142643                                                                                                                                                                                                                                                                                                                                                                                                                                                                                                                                                                                                                                                                                        | HOPITAL SAINT ANDRE                                                                                                        | CNR Virus des Infections Respiratoires - France SUD                                                     | Antonin Bal, Gregory Destras, Gwendolynne Burfin, Hadrien Regue, Quentin Semanas, Martine Valette, Bruno Lina, Laurence Josset                                                                                                                                                                                                                                                                                                                                                                        |
| EPI_ISL_2151507                                                                                                                                                                                                                                                                                                                                                                                                                                                                                                                                                                                                                                                                                        | North Dakota Department of Health, Public Health Laboratory                                                                | North Dakota Department of Health, Public Health Laboratory                                             | Lisa Wingerter                                                                                                                                                                                                                                                                                                                                                                                                                                                                                        |
| EPI_ISL_2151942, EPI_ISL_2152122, EPI_ISL_2152298                                                                                                                                                                                                                                                                                                                                                                                                                                                                                                                                                                                                                                                      | Viollier AG                                                                                                                | Department of Biosystems Science and Engineering, ETH Zürich                                            | Chaoran Chen, Sarah Nadeau, Catharine Aquino, Ivan Topolsky, Philipp Jablonski, Lara Fuhrmann, David Dreifuss, Katharina Jahn, Daniel Ehram, Isabel Stürmer, Andrea Cabral de Gouvea, Maria Domenica Moccia, Simon Grüter, Timothy Sykes, Lennart Opitz, Griffin White, Laura Neff, Doris Popovic, Andrea Patrignani, Jay Tracy, Ralph Schlapbach, Christiane Beckmann, Maurice Redondo, Olivier Kobel, Christoph Noppen, Sophie Seidel, Noemie Santamaria de Souza, Niko Beerenwinkel, Tanja Stadler |
| EPI_ISL_2153456, EPI_ISL_2153458, EPI_ISL_2153459, EPI_ISL_2153466, EPI_ISL_2153473                                                                                                                                                                                                                                                                                                                                                                                                                                                                                                                                                                                                                    | Institute for Infectious Diseases, University of Bern                                                                      | Institute for Infectious Diseases, University of Bern                                                   | Stefan Neuenschwander, Christian Baumann, Miguel A Terrazos Miani, Cora Sägesser, Pascal Bittel, Peter Keller, Franziska Suter-Rinkler, Stephen L Leib, Alban Ramette                                                                                                                                                                                                                                                                                                                                 |
| EPI_ISL_2157724, EPI_ISL_2157725                                                                                                                                                                                                                                                                                                                                                                                                                                                                                                                                                                                                                                                                       | Reditus Laboratories                                                                                                       | Reditus Laboratories                                                                                    | Joshua J. Geltz, Ph.D., Robert M. Sgambelluri, Ph.D., Cassidy Philips, M.S., Alexa Eichelberger, M.S.                                                                                                                                                                                                                                                                                                                                                                                                 |
| EPI_ISL_2158645                                                                                                                                                                                                                                                                                                                                                                                                                                                                                                                                                                                                                                                                                        | Missouri State Public Health Laboratory                                                                                    | Missouri State Public Health Laboratory                                                                 | Matthew Sinn, Joshua Barry, Ashley New                                                                                                                                                                                                                                                                                                                                                                                                                                                                |
| EPI_ISL_2161463                                                                                                                                                                                                                                                                                                                                                                                                                                                                                                                                                                                                                                                                                        | Maryland Genomics, Institute for Genome Sciences, University of Maryland School of Medicine                                | Maryland Genomics, Institute for Genome Sciences, University of Maryland School of Medicine             | Tallon, Luke J; Sadzewicz, Lisa D; Humphrys, Mike; Ott, Sandra; Roussey, Holly; Mehta, Aditya; Vavikolanu, Kranthi; Fraser, Claire M; Ravel, Jacques                                                                                                                                                                                                                                                                                                                                                  |
| EPI_ISL_2161739                                                                                                                                                                                                                                                                                                                                                                                                                                                                                                                                                                                                                                                                                        | NYU Langone Health                                                                                                         | Departments of Pathology and Medicine, New York University School of Medicine                           | Adriana Heguy, Dacia Dimartino, Emily Guzman, Christian Marier, Peter Meyn, Sitharam Ramaswami, Gael Westby, Paul Zappile, Yutong Zhang, Paolo Cotzia, Guiqing Wang                                                                                                                                                                                                                                                                                                                                   |
| EPI_ISL_2161791                                                                                                                                                                                                                                                                                                                                                                                                                                                                                                                                                                                                                                                                                        | NL-Dr. Leonard A. Miller Centre for Health Services                                                                        | National Microbiology Laboratory (NML)                                                                  | Anna Majer, Shari Tyson, Grace Seo, Philip Mabon, Elsie Grudeski, Rhiannon Huzarewich, Russell Mandes, Anneliese Landgraf, Jennifer Tanner, Natalie Knox, Morag Graham, Gary Van Domselaar, Robert Needle, Yang Yu, Adel Malek, Laura Gilbert, George Zahariadis, Nathalie Bastien, Yan Li, Timothy Booth, Darian Hole, Madison Chapel, Kirsten Biggar, Kerri Smith, CanCOGen's metadata curation team, Public Health Agency of Canada CanCOGen team                                                  |
| EPI_ISL_2162032                                                                                                                                                                                                                                                                                                                                                                                                                                                                                                                                                                                                                                                                                        | NS-QEII Health Sciences Centre                                                                                             | National Microbiology Laboratory (NML)                                                                  | Anna Majer, Shari Tyson, Grace Seo, Philip Mabon, Elsie Grudeski, Rhiannon Huzarewich, Russell Mandes, Anneliese Landgraf, Jennifer Tanner, Natalie Knox, Morag Graham, Gary Van Domselaar, Todd Hatchette, Jason LeBlanc, Janice Pettipas, Dan Gaston, Nathalie Bastien, Yan Li, Timothy Booth,                                                                                                                                                                                                      |

|                                                                                                                                                                                                                                                                                                                                                                                                                                                                                                                                                                                                                                                                                                        |                                                                    |                                                                                           |                                                                                                                                                                                                                                                                                                                                                                                                                                                                                                                                                                                                                                                                                                                                                                                                                                                                                                                                                                                                                                                |
|--------------------------------------------------------------------------------------------------------------------------------------------------------------------------------------------------------------------------------------------------------------------------------------------------------------------------------------------------------------------------------------------------------------------------------------------------------------------------------------------------------------------------------------------------------------------------------------------------------------------------------------------------------------------------------------------------------|--------------------------------------------------------------------|-------------------------------------------------------------------------------------------|------------------------------------------------------------------------------------------------------------------------------------------------------------------------------------------------------------------------------------------------------------------------------------------------------------------------------------------------------------------------------------------------------------------------------------------------------------------------------------------------------------------------------------------------------------------------------------------------------------------------------------------------------------------------------------------------------------------------------------------------------------------------------------------------------------------------------------------------------------------------------------------------------------------------------------------------------------------------------------------------------------------------------------------------|
| EPI_ISL_2166767, EPI_ISL_2166786, EPI_ISL_2166788, EPI_ISL_2166849, EPI_ISL_2166882, EPI_ISL_2167234, EPI_ISL_2167266, EPI_ISL_2167267, EPI_ISL_2167383, EPI_ISL_2167600, EPI_ISL_2167616, EPI_ISL_2167859, EPI_ISL_2167896, EPI_ISL_2168041, EPI_ISL_2168042, EPI_ISL_2168148, EPI_ISL_2168150, EPI_ISL_2168152, EPI_ISL_2168263, EPI_ISL_2168265, EPI_ISL_2168275, EPI_ISL_2168349, EPI_ISL_2168405, EPI_ISL_2168407, EPI_ISL_2168916, EPI_ISL_2168917, EPI_ISL_2168922, EPI_ISL_2168923, EPI_ISL_2168942, EPI_ISL_2168971, EPI_ISL_2169068, EPI_ISL_2169069, EPI_ISL_2169621, EPI_ISL_2169636, EPI_ISL_2169812, EPI_ISL_2169813, EPI_ISL_2170037, EPI_ISL_2170500, EPI_ISL_2170514, EPI_ISL_2170515 |                                                                    |                                                                                           |                                                                                                                                                                                                                                                                                                                                                                                                                                                                                                                                                                                                                                                                                                                                                                                                                                                                                                                                                                                                                                                |
| see above                                                                                                                                                                                                                                                                                                                                                                                                                                                                                                                                                                                                                                                                                              | Alberta Precision Labs (APL)                                       | Public Health Agency of Canada (PHAC) National Microbiology Laboratory                    | Buss, E, Croxen M, Deo A, Dieu P, Gill K, Ferrato C, Khan F, Koleva P, Li V, Lloyd C, Lynch T, Ma R, Murphy S, Pabbaraju K, Shokoples S, Tipples G, Thayer J, Whitehouse M, Wong A, Yu C, Zelyas N                                                                                                                                                                                                                                                                                                                                                                                                                                                                                                                                                                                                                                                                                                                                                                                                                                             |
| EPI_ISL_2178604                                                                                                                                                                                                                                                                                                                                                                                                                                                                                                                                                                                                                                                                                        | Centracare Laboratory Services                                     | Minnesota Department of Health, Public Health Laboratory                                  | Alexandra Lorentz, Jacob Garfin, Matt Plumb, and Xiong Wang                                                                                                                                                                                                                                                                                                                                                                                                                                                                                                                                                                                                                                                                                                                                                                                                                                                                                                                                                                                    |
| EPI_ISL_2179667                                                                                                                                                                                                                                                                                                                                                                                                                                                                                                                                                                                                                                                                                        | Institute for Developing Science and Health Initiatives (ideSHI)   | Institute for Developing Science and Health Initiatives (ideSHI)                          | Hassan Afrad, Sadia Rahman, Manjur Hossain Khan, Firdausi Qadri, Tahmina Shirin                                                                                                                                                                                                                                                                                                                                                                                                                                                                                                                                                                                                                                                                                                                                                                                                                                                                                                                                                                |
| EPI_ISL_2181691                                                                                                                                                                                                                                                                                                                                                                                                                                                                                                                                                                                                                                                                                        | Laboratory Corporation of America                                  | Centers for Disease Control and Prevention Division of Viral Diseases, Pathogen Discovery | Dakota Howard, Dhvani Batra, Peter W. Cook, Kara Moser, Adrian Paskey, Jason Caravas, Benjamin Rambo-Martin, Shatavia Morrison, Christopher Gulvick, Scott Sammons, Yvette Unoarumhi, Darlene Wagner, Matthew Schmeer, Minoq Agarwal, Eyad Almasri, Debbie Boles, Ayla Burns, Nuthwin Charoensri, Oren Cohen, Susan Countryman, Mary Ann Cristobal, Bobbi Croy, Suzanne Dale, Hrushikesh Deshmukh, Amanda Douglas, Vincent Drouillon, Marcia Eisenberg, Howard Engler, Rama Ghatti, Prashant Gupta, Susan Hicks, Jake Humphrey, Lax Iyer, Manoj Jain, Mohan Koli, Brian Krueger, Tim Kuphal, Stanley Letovsky, Michael Levandoski, Craig Lukasik, Jonathan Meltzer, Brian Norvell, Mindy Nye, Scott Parker, Christos Petropoulos, John Pruitt, Steven Ragan, Scott Ryan, Mike Sapeta, Jana Schroth, Suresh Babu Selvaraju, Goran Stevovic, Amanda Suchanek, Andrea Throop, Lyndon Tilson, Thomas Urban, Joe Voshell, Kimberly Wagner, Jonathan Williams, Mary Williamson, Qian Zeng, Tricia Zwielfelhofer, Clinton R. Paden, Duncan MacCannell |
| EPI_ISL_2185545                                                                                                                                                                                                                                                                                                                                                                                                                                                                                                                                                                                                                                                                                        | Curative                                                           | New Mexico Department of Health Scientific Laboratory                                     | Ellie Johnson, D'eldra Malone, Jennifer Benoit, Ratheesh Rajan, Linda Salazar, Anastacia Griego-Fisher                                                                                                                                                                                                                                                                                                                                                                                                                                                                                                                                                                                                                                                                                                                                                                                                                                                                                                                                         |
| EPI_ISL_2188411                                                                                                                                                                                                                                                                                                                                                                                                                                                                                                                                                                                                                                                                                        | Hospital                                                           | National Reference Center for Viruses of Respiratory Infections, Institut Pasteur, Paris  | Marion Barbet, Sylvie Behillil, Méline Bizard, Angela Brisebarre, Camille Capel, Vincent Enouf, Louise Lefrançois, Frédéric Lemoine, Christophe Malabat, Corinne Maufrais, Etienne Simon-Lorière, Maud Vanpeene, Sylvie Van der Werf, CéCile Farrugia                                                                                                                                                                                                                                                                                                                                                                                                                                                                                                                                                                                                                                                                                                                                                                                          |
| EPI_ISL_2188429, EPI_ISL_2188430                                                                                                                                                                                                                                                                                                                                                                                                                                                                                                                                                                                                                                                                       | Labo Analyses Med                                                  | National Reference Center for Viruses of Respiratory Infections, Institut Pasteur, Paris  | Marion Barbet, Sylvie Behillil, Méline Bizard, Angela Brisebarre, Camille Capel, Vincent Enouf, Louise Lefrançois, Frédéric Lemoine, Christophe Malabat, Corinne Maufrais, Etienne Simon-Lorière, Maud Vanpeene, Sylvie Van der Werf, GéRaldine Bonnaudet                                                                                                                                                                                                                                                                                                                                                                                                                                                                                                                                                                                                                                                                                                                                                                                      |
| EPI_ISL_2192304, EPI_ISL_2192346                                                                                                                                                                                                                                                                                                                                                                                                                                                                                                                                                                                                                                                                       | Lab voor klinische biologie                                        | Lab voor klinische biologie                                                               | Marija Janevska, Hannelore Hamerlinck, Bruno Verhasselt                                                                                                                                                                                                                                                                                                                                                                                                                                                                                                                                                                                                                                                                                                                                                                                                                                                                                                                                                                                        |
| EPI_ISL_2193257                                                                                                                                                                                                                                                                                                                                                                                                                                                                                                                                                                                                                                                                                        | Baylor Scott & White-Temple                                        | Baylor Scott & White-Temple                                                               | Ari Rao, Linden Morales, Kimberly Walker, Marcus Volz, Shelby Hendrickson                                                                                                                                                                                                                                                                                                                                                                                                                                                                                                                                                                                                                                                                                                                                                                                                                                                                                                                                                                      |
| EPI_ISL_2193341, EPI_ISL_2193343                                                                                                                                                                                                                                                                                                                                                                                                                                                                                                                                                                                                                                                                       | Wyoming Public Health Laboratory                                   | Wyoming Public Health Laboratory                                                          | Jim Mildenerger, Wanda Manley, Noah Hull, Taylor Fearing, Lynette Gumbleton, Channing Weber, Ashley Norberg, Chayse Rowley, Marley Goetz, Brian Dominguez, Elliot Thomasson, Sam Britz, Cari Sloma, and Rob Christensen                                                                                                                                                                                                                                                                                                                                                                                                                                                                                                                                                                                                                                                                                                                                                                                                                        |
| EPI_ISL_2193352                                                                                                                                                                                                                                                                                                                                                                                                                                                                                                                                                                                                                                                                                        | SC (UCO) Igiene e Sanità Pubblica, ASUGI, Trieste                  | ARGO Laboratorio Genomica ed Epigenomica                                                  | Licastro D, Dal Monego S, Degasperri M, Marcello A, Segat L, Piscianz E, D'Agaro P                                                                                                                                                                                                                                                                                                                                                                                                                                                                                                                                                                                                                                                                                                                                                                                                                                                                                                                                                             |
| EPI_ISL_2193367                                                                                                                                                                                                                                                                                                                                                                                                                                                                                                                                                                                                                                                                                        | University of Wisconsin-Madison AIDS Vaccine Research Laboratories | University of Wisconsin-Madison AIDS Vaccine Research Laboratories                        | Gage Moreno, Katarina Braun, et al. AIDS Vaccine Research Laboratories                                                                                                                                                                                                                                                                                                                                                                                                                                                                                                                                                                                                                                                                                                                                                                                                                                                                                                                                                                         |
| EPI_ISL_2193769                                                                                                                                                                                                                                                                                                                                                                                                                                                                                                                                                                                                                                                                                        | Plateforme de testing Namuroise                                    | Plateforme de testing Namuroise                                                           | Lesty Nyinkeu Kemamen; Otto Gaetan ; Denis Olivier ; Degosserie Jonathan ; Mullier François                                                                                                                                                                                                                                                                                                                                                                                                                                                                                                                                                                                                                                                                                                                                                                                                                                                                                                                                                    |
| EPI_ISL_2193780                                                                                                                                                                                                                                                                                                                                                                                                                                                                                                                                                                                                                                                                                        | SC (UCO) Igiene e Sanità Pubblica, ASUGI, Trieste                  | ARGO Laboratorio Genomica ed Epigenomica                                                  | Licastro D, Dal Monego S, Degasperri M, Marcello A, Segat L, Piscianz E, D'Agaro P                                                                                                                                                                                                                                                                                                                                                                                                                                                                                                                                                                                                                                                                                                                                                                                                                                                                                                                                                             |
| EPI_ISL_2193819, EPI_ISL_2193866, EPI_ISL_2193954                                                                                                                                                                                                                                                                                                                                                                                                                                                                                                                                                                                                                                                      | National Virus Reference Laboratory                                | National Virus Reference Laboratory                                                       | Zoe Yandle, Charlene Bennett, Gabriel Gonzalez, Michael Carr, Jonathan Dean, Cillian F De Gascun                                                                                                                                                                                                                                                                                                                                                                                                                                                                                                                                                                                                                                                                                                                                                                                                                                                                                                                                               |
| EPI_ISL_2194128                                                                                                                                                                                                                                                                                                                                                                                                                                                                                                                                                                                                                                                                                        | UW Virology Lab                                                    | UW Virology Lab                                                                           | Pavitra Roychoudhury, Hong Xie, Lasata Shrestha, Tien V. Nguyen, Shah Mohamed Bakhsh, Michelle Lin, Noah R. Baker, Ricardo Perez, Sean Ellis, Nathan Breit, Robert J. Livingston, Meei-Li Huang, Keith R. Jerome, Patrick Mathias, Alexander Greninger                                                                                                                                                                                                                                                                                                                                                                                                                                                                                                                                                                                                                                                                                                                                                                                         |
| EPI_ISL_2194541                                                                                                                                                                                                                                                                                                                                                                                                                                                                                                                                                                                                                                                                                        | SC (UCO) Igiene e Sanità Pubblica, ASUGI, Trieste                  | ARGO Laboratorio Genomica ed Epigenomica                                                  | Licastro D, Dal Monego S, Degasperri M, Marcello A, Segat L, Piscianz E, D'Agaro P                                                                                                                                                                                                                                                                                                                                                                                                                                                                                                                                                                                                                                                                                                                                                                                                                                                                                                                                                             |
| EPI_ISL_2195365                                                                                                                                                                                                                                                                                                                                                                                                                                                                                                                                                                                                                                                                                        | Colorado Department of Public Health and Environment               | Colorado Department of Public Health and Environment                                      | Laura Bankers, Molly C. Hetherington-Rauth, Diana Ir, Alexandria Rosshiem, Shannon R. Matzinger, Sarah Elizabeth Totten, Emily A. Travanty                                                                                                                                                                                                                                                                                                                                                                                                                                                                                                                                                                                                                                                                                                                                                                                                                                                                                                     |
| EPI_ISL_2195669, EPI_ISL_2195671, EPI_ISL_2195683, EPI_ISL_2195693                                                                                                                                                                                                                                                                                                                                                                                                                                                                                                                                                                                                                                     | QLabs                                                              | WVU and Marshall University Combined Genomics Core Facilities                             | James Denvir, Peter Stoilov, Peter Perrotta, Wesley Kible, Ryan Percifield                                                                                                                                                                                                                                                                                                                                                                                                                                                                                                                                                                                                                                                                                                                                                                                                                                                                                                                                                                     |
| EPI_ISL_2198421, EPI_ISL_2198623, EPI_ISL_2198638                                                                                                                                                                                                                                                                                                                                                                                                                                                                                                                                                                                                                                                      | Lighthouse Lab in Milton Keynes                                    | Wellcome Sanger Institute for the COVID-19 Genomics UK (COG-UK) Consortium                | The Lighthouse Lab in Milton Keynes and Alex Alderton, Roberto Amato, Jeffrey Barrett, Sonia Goncalves, Ewan Harrison, David K. Jackson, Ian Johnston, Dominic Kwiatkowski, Cordelia Langford, John Sillitoe on behalf of the Wellcome Sanger Institute COVID-19 Surveillance Team                                                                                                                                                                                                                                                                                                                                                                                                                                                                                                                                                                                                                                                                                                                                                             |
| EPI_ISL_2200156                                                                                                                                                                                                                                                                                                                                                                                                                                                                                                                                                                                                                                                                                        | SC (UCO) Igiene e Sanità Pubblica, ASUGI, Trieste                  | ARGO Laboratorio Genomica ed Epigenomica                                                  | Licastro D, Dal Monego S, Degasperri M, Marcello A, Segat L, Piscianz E, D'Agaro P                                                                                                                                                                                                                                                                                                                                                                                                                                                                                                                                                                                                                                                                                                                                                                                                                                                                                                                                                             |
| EPI_ISL_2200381                                                                                                                                                                                                                                                                                                                                                                                                                                                                                                                                                                                                                                                                                        | Houston Methodist Hospital                                         | Houston Methodist Hospital                                                                | Randall J. Olsen, Paul A. Christensen, S. Wesley Long, Sishir Subedi, Robert Olson, Marcus Nguyen, James J. Davis, Matthew Ojeda Saavedra, Prasanti Yerramilli, Layne Pruitt, Kristina Reppond, Madison N. Shyer, Jessica Cambric, Ryan Gadd, Ilya J. Finkelstein, Jimmy Gollihar, and James M. Musser                                                                                                                                                                                                                                                                                                                                                                                                                                                                                                                                                                                                                                                                                                                                         |
| EPI_ISL_2203599                                                                                                                                                                                                                                                                                                                                                                                                                                                                                                                                                                                                                                                                                        | Illinois Department of Public Health - Springfield Lab             | Illinois Department of Public Health - Springfield Lab                                    | Bryan Sim, Gordon McCall                                                                                                                                                                                                                                                                                                                                                                                                                                                                                                                                                                                                                                                                                                                                                                                                                                                                                                                                                                                                                       |
| EPI_ISL_2205889, EPI_ISL_2207204                                                                                                                                                                                                                                                                                                                                                                                                                                                                                                                                                                                                                                                                       | Swedish national genomic surveillance program of SARS-CoV-2        | The Public Health Agency of Sweden                                                        | Maximilian Riess, Maria Lind Karlberg, Alma Brolund, Swedish national genomic surveillance program of SARS-CoV-2                                                                                                                                                                                                                                                                                                                                                                                                                                                                                                                                                                                                                                                                                                                                                                                                                                                                                                                               |
| EPI_ISL_2209295                                                                                                                                                                                                                                                                                                                                                                                                                                                                                                                                                                                                                                                                                        | HOSP MUN DE MOGI DAS CRUZES PREF WALDEMAR COSTA FILHO              | Instituto Butantan / Mendelics                                                            | Dimas Tadeu Covas, Antonio Jorge Martins, Claudia Renata dos Santos Barros, David Schlesinger, Debora Botequiao Moretti, Elaine Cristina Marqueze, Elaine Vieira Santos, Evandra Strazza Rodrigues, Heidge Fukumasu, Jayme Augusto de Souza-Neto, José Salvatore Leister Patané, Luiz Alcantara, Luiz Lehmann Coutinho, Maria Carolina Elias, Maurício Lacerda Nogueira, Rafael dos Santos Bezerra, Raul Machado Neto, Rejane Maria Tommasini Grotto, Ricardo Haddad, Sandra Coccuzzo Sampaio Vessoni, Simone Kashima, Svetoslav Nanev Slavov, Vincent Louis Viala                                                                                                                                                                                                                                                                                                                                                                                                                                                                             |
| EPI_ISL_2210808                                                                                                                                                                                                                                                                                                                                                                                                                                                                                                                                                                                                                                                                                        | Wyoming Public Health Laboratory                                   | Wyoming Public Health Laboratory                                                          | Jim Mildenerger, Wanda Manley, Noah Hull, Taylor Fearing, Lynette Gumbleton, Channing Weber, Ashley Norberg, Chayse Rowley, Marley Goetz, Brian Dominguez, Elliot Thomasson, Sam Britz, Cari Sloma, and Rob Christensen                                                                                                                                                                                                                                                                                                                                                                                                                                                                                                                                                                                                                                                                                                                                                                                                                        |
| EPI_ISL_2211247, EPI_ISL_2211251, EPI_ISL_2211321                                                                                                                                                                                                                                                                                                                                                                                                                                                                                                                                                                                                                                                      | San Juan Regional Medical Center                                   | New Mexico Department of Health Scientific Laboratory                                     | Ellie Johnson, D'eldra Malone, Jennifer Benoit, Ratheesh Rajan, Linda Salazar, Anastacia Griego-Fisher                                                                                                                                                                                                                                                                                                                                                                                                                                                                                                                                                                                                                                                                                                                                                                                                                                                                                                                                         |
| EPI_ISL_2212558, EPI_ISL_2212560, EPI_ISL_2212563, EPI_ISL_2212565                                                                                                                                                                                                                                                                                                                                                                                                                                                                                                                                                                                                                                     | Viollier AG                                                        | Department of Biosystems Science and Engineering, ETH Zürich                              | Christian Beisel, Sarah Nadeau, Chaoran Chen, Ivan Topolsky, Philipp Jablonski, Lara Fuhrmann, David Dreifuss, Katharina Jahn, Rebecca Denes, Mirjam Feldkamp, Ina Nissen, Natascha Santacroce, Elodie Burcklen, Christiane Beckmann, Maurice Redondo, Olivier Kobel, Christoph Noppen, Sophie Seidel, Noemie Santamaria de Souza, Niko Beerenwinkel, Tanja Stadler                                                                                                                                                                                                                                                                                                                                                                                                                                                                                                                                                                                                                                                                            |
| EPI_ISL_2225554, EPI_ISL_2225570, EPI_ISL_2225581                                                                                                                                                                                                                                                                                                                                                                                                                                                                                                                                                                                                                                                      | University of Wisconsin-Madison AIDS Vaccine Research Laboratories | University of Wisconsin-Madison AIDS Vaccine Research Laboratories                        | Gage Moreno, Katarina Braun, et al. AIDS Vaccine Research Laboratories                                                                                                                                                                                                                                                                                                                                                                                                                                                                                                                                                                                                                                                                                                                                                                                                                                                                                                                                                                         |
| EPI_ISL_2227310                                                                                                                                                                                                                                                                                                                                                                                                                                                                                                                                                                                                                                                                                        | Institute for Infectious Diseases, University of Bern              | Institute for Infectious Diseases, University of Bern                                     | Stefan Neuenchwander, Christian Baumann, Miguel A Terrazos Miani, Cora Sägesser, Pascal Bittel, Peter Keller, Franziska Suter-Riniker, Stephen L Leib, Alban Ramette                                                                                                                                                                                                                                                                                                                                                                                                                                                                                                                                                                                                                                                                                                                                                                                                                                                                           |
| EPI_ISL_2227426                                                                                                                                                                                                                                                                                                                                                                                                                                                                                                                                                                                                                                                                                        | MD PHL                                                             | MD PHL                                                                                    | Maryland Department of Health Laboratories Administration                                                                                                                                                                                                                                                                                                                                                                                                                                                                                                                                                                                                                                                                                                                                                                                                                                                                                                                                                                                      |
| EPI_ISL_2228292                                                                                                                                                                                                                                                                                                                                                                                                                                                                                                                                                                                                                                                                                        | Orange County Public Health Lab                                    | Chan-Zuckerberg Biohub                                                                    | CZB Cliahub Consortium                                                                                                                                                                                                                                                                                                                                                                                                                                                                                                                                                                                                                                                                                                                                                                                                                                                                                                                                                                                                                         |
| EPI_ISL_2229227                                                                                                                                                                                                                                                                                                                                                                                                                                                                                                                                                                                                                                                                                        | Idaho Bureau of Laboratories                                       | Center for Global Health, University of New Mexico Health Sciences Center                 | Daryl Domman, Kurt Schwalm, Valerie Morley, Matthew Burns, Robert Voermans, Christopher Ball, Darrell Dinwiddie                                                                                                                                                                                                                                                                                                                                                                                                                                                                                                                                                                                                                                                                                                                                                                                                                                                                                                                                |
| EPI_ISL_2229443, EPI_ISL_2229458                                                                                                                                                                                                                                                                                                                                                                                                                                                                                                                                                                                                                                                                       | Virginia Division of Consolidated Laboratory Services              | Virginia Division of Consolidated Laboratory Services                                     | Virginia DCLS                                                                                                                                                                                                                                                                                                                                                                                                                                                                                                                                                                                                                                                                                                                                                                                                                                                                                                                                                                                                                                  |
| EPI_ISL_2229497, EPI_ISL_2229774                                                                                                                                                                                                                                                                                                                                                                                                                                                                                                                                                                                                                                                                       | Massachusetts State Public Health Laboratory                       | Massachusetts State Public Health Laboratory                                              | Andrew Lang, Timelia Fink, Glen Gallagher, Sandra Smole                                                                                                                                                                                                                                                                                                                                                                                                                                                                                                                                                                                                                                                                                                                                                                                                                                                                                                                                                                                        |
| EPI_ISL_2229966                                                                                                                                                                                                                                                                                                                                                                                                                                                                                                                                                                                                                                                                                        | Florida Bureau of Public Health Laboratories                       | Florida Bureau of Public Health Laboratories                                              | Sarah Schmedes, Jason Blanton                                                                                                                                                                                                                                                                                                                                                                                                                                                                                                                                                                                                                                                                                                                                                                                                                                                                                                                                                                                                                  |
| EPI_ISL_2230601, EPI_ISL_2230606                                                                                                                                                                                                                                                                                                                                                                                                                                                                                                                                                                                                                                                                       | University of Wisconsin-Madison AIDS Vaccine Research Laboratories | University of Wisconsin-Madison AIDS Vaccine Research Laboratories                        | Gage Moreno, Katarina Braun, et al. AIDS Vaccine Research Laboratories                                                                                                                                                                                                                                                                                                                                                                                                                                                                                                                                                                                                                                                                                                                                                                                                                                                                                                                                                                         |

|                                                                                                                                                                                                                                                                                                                                                                                                                                                                                                                                                                                                                                                                                                                                                                                                                                                                                                                                                                                                                                                                                                                                                                                                                                                                                                                                                                                                                                                                                                                                                                                                                                                                                                                                                                                                                                                                                                                                                                                                                                                                                                                                                                                                                                                                                                                                                                                                                                                                                                                                                                                                                                                                                                                                                                                                                                                                                                                                                                                                                                                                                                                                                                                                                                                                                                                                                                                                                                                                                                                                                                                                                                                                                                                                                                                                                                                                                                                                                                |                                                                                                                                                                                                                                                                                                                                                                                                                                                                      |                                                                                                                                                                                                  |                                                                                                                                                                                                                                                                                                                                                                                                                                                                                                                                                                                                                                                                                                                                                                                       |
|----------------------------------------------------------------------------------------------------------------------------------------------------------------------------------------------------------------------------------------------------------------------------------------------------------------------------------------------------------------------------------------------------------------------------------------------------------------------------------------------------------------------------------------------------------------------------------------------------------------------------------------------------------------------------------------------------------------------------------------------------------------------------------------------------------------------------------------------------------------------------------------------------------------------------------------------------------------------------------------------------------------------------------------------------------------------------------------------------------------------------------------------------------------------------------------------------------------------------------------------------------------------------------------------------------------------------------------------------------------------------------------------------------------------------------------------------------------------------------------------------------------------------------------------------------------------------------------------------------------------------------------------------------------------------------------------------------------------------------------------------------------------------------------------------------------------------------------------------------------------------------------------------------------------------------------------------------------------------------------------------------------------------------------------------------------------------------------------------------------------------------------------------------------------------------------------------------------------------------------------------------------------------------------------------------------------------------------------------------------------------------------------------------------------------------------------------------------------------------------------------------------------------------------------------------------------------------------------------------------------------------------------------------------------------------------------------------------------------------------------------------------------------------------------------------------------------------------------------------------------------------------------------------------------------------------------------------------------------------------------------------------------------------------------------------------------------------------------------------------------------------------------------------------------------------------------------------------------------------------------------------------------------------------------------------------------------------------------------------------------------------------------------------------------------------------------------------------------------------------------------------------------------------------------------------------------------------------------------------------------------------------------------------------------------------------------------------------------------------------------------------------------------------------------------------------------------------------------------------------------------------------------------------------------------------------------------------------|----------------------------------------------------------------------------------------------------------------------------------------------------------------------------------------------------------------------------------------------------------------------------------------------------------------------------------------------------------------------------------------------------------------------------------------------------------------------|--------------------------------------------------------------------------------------------------------------------------------------------------------------------------------------------------|---------------------------------------------------------------------------------------------------------------------------------------------------------------------------------------------------------------------------------------------------------------------------------------------------------------------------------------------------------------------------------------------------------------------------------------------------------------------------------------------------------------------------------------------------------------------------------------------------------------------------------------------------------------------------------------------------------------------------------------------------------------------------------------|
| EPI_ISL_2232220, EPI_ISL_2232228, EPI_ISL_2232249                                                                                                                                                                                                                                                                                                                                                                                                                                                                                                                                                                                                                                                                                                                                                                                                                                                                                                                                                                                                                                                                                                                                                                                                                                                                                                                                                                                                                                                                                                                                                                                                                                                                                                                                                                                                                                                                                                                                                                                                                                                                                                                                                                                                                                                                                                                                                                                                                                                                                                                                                                                                                                                                                                                                                                                                                                                                                                                                                                                                                                                                                                                                                                                                                                                                                                                                                                                                                                                                                                                                                                                                                                                                                                                                                                                                                                                                                                              | City of Milwaukee Health Department Laboratory                                                                                                                                                                                                                                                                                                                                                                                                                       | City of Milwaukee Health Department Laboratory                                                                                                                                                   | Sanjib Bhattacharyya, Manjeet Khubbar, Amy Bauer, Jennifer Lentz, Samantha Scott                                                                                                                                                                                                                                                                                                                                                                                                                                                                                                                                                                                                                                                                                                      |
| EPI_ISL_2232753, EPI_ISL_2232754, EPI_ISL_2232755, EPI_ISL_2232756                                                                                                                                                                                                                                                                                                                                                                                                                                                                                                                                                                                                                                                                                                                                                                                                                                                                                                                                                                                                                                                                                                                                                                                                                                                                                                                                                                                                                                                                                                                                                                                                                                                                                                                                                                                                                                                                                                                                                                                                                                                                                                                                                                                                                                                                                                                                                                                                                                                                                                                                                                                                                                                                                                                                                                                                                                                                                                                                                                                                                                                                                                                                                                                                                                                                                                                                                                                                                                                                                                                                                                                                                                                                                                                                                                                                                                                                                             | Institute for Laboratory Diagnostics and Microbiology, Klinikum Klagenfurt am Wörthersee                                                                                                                                                                                                                                                                                                                                                                             | Bergthaler laboratory, CeMM Research Center for Molecular Medicine of the Austrian Academy of Sciences                                                                                           | Lukas Endler, Anna Schedl, Fabian Amman, Petr Triska, Thomas Penz, Benedikt Agerer, Maelle Le Moing, Michael Schuster, Bekir Erguner, Jan Laine, Martin Senekowitsch, Christoph Bock, Andreas Bergthaler                                                                                                                                                                                                                                                                                                                                                                                                                                                                                                                                                                              |
| EPI_ISL_2233052                                                                                                                                                                                                                                                                                                                                                                                                                                                                                                                                                                                                                                                                                                                                                                                                                                                                                                                                                                                                                                                                                                                                                                                                                                                                                                                                                                                                                                                                                                                                                                                                                                                                                                                                                                                                                                                                                                                                                                                                                                                                                                                                                                                                                                                                                                                                                                                                                                                                                                                                                                                                                                                                                                                                                                                                                                                                                                                                                                                                                                                                                                                                                                                                                                                                                                                                                                                                                                                                                                                                                                                                                                                                                                                                                                                                                                                                                                                                                | UTGSAF                                                                                                                                                                                                                                                                                                                                                                                                                                                               | UTGSAF                                                                                                                                                                                           | Jessica Podnar, Sylvie Beaudenon, Audrey Kelly, Zachary Carver, Anna Battenhouse, Andreas Matouschek                                                                                                                                                                                                                                                                                                                                                                                                                                                                                                                                                                                                                                                                                  |
| EPI_ISL_2233084, EPI_ISL_2233085                                                                                                                                                                                                                                                                                                                                                                                                                                                                                                                                                                                                                                                                                                                                                                                                                                                                                                                                                                                                                                                                                                                                                                                                                                                                                                                                                                                                                                                                                                                                                                                                                                                                                                                                                                                                                                                                                                                                                                                                                                                                                                                                                                                                                                                                                                                                                                                                                                                                                                                                                                                                                                                                                                                                                                                                                                                                                                                                                                                                                                                                                                                                                                                                                                                                                                                                                                                                                                                                                                                                                                                                                                                                                                                                                                                                                                                                                                                               | Institute for Developing Science and Health Initiatives (ideSHI)                                                                                                                                                                                                                                                                                                                                                                                                     | Institute for Developing Science and Health Initiatives (ideSHI)                                                                                                                                 | Hassan Afrad, Sadia Rahman, Manjur Hossain Khan, Firdausi Qadri, Tahmina Shirin                                                                                                                                                                                                                                                                                                                                                                                                                                                                                                                                                                                                                                                                                                       |
| EPI_ISL_2233361, EPI_ISL_2233367, EPI_ISL_2233372                                                                                                                                                                                                                                                                                                                                                                                                                                                                                                                                                                                                                                                                                                                                                                                                                                                                                                                                                                                                                                                                                                                                                                                                                                                                                                                                                                                                                                                                                                                                                                                                                                                                                                                                                                                                                                                                                                                                                                                                                                                                                                                                                                                                                                                                                                                                                                                                                                                                                                                                                                                                                                                                                                                                                                                                                                                                                                                                                                                                                                                                                                                                                                                                                                                                                                                                                                                                                                                                                                                                                                                                                                                                                                                                                                                                                                                                                                              | Virology Laboratory, International Centre for Diarrhoeal Disease Research, Bangladesh (ICDDR,B)                                                                                                                                                                                                                                                                                                                                                                      | Virology Laboratory, International Centre for Diarrhoeal Disease Research, Bangladesh (ICDDR,B)                                                                                                  | Mohammad Enayet Hossain, Mojinu Miah, Rashedul Hasan, Md. Mahfuzur Rahman, Mohammed Ziaur Rahman, Mustafizur Rahman                                                                                                                                                                                                                                                                                                                                                                                                                                                                                                                                                                                                                                                                   |
| EPI_ISL_2233826                                                                                                                                                                                                                                                                                                                                                                                                                                                                                                                                                                                                                                                                                                                                                                                                                                                                                                                                                                                                                                                                                                                                                                                                                                                                                                                                                                                                                                                                                                                                                                                                                                                                                                                                                                                                                                                                                                                                                                                                                                                                                                                                                                                                                                                                                                                                                                                                                                                                                                                                                                                                                                                                                                                                                                                                                                                                                                                                                                                                                                                                                                                                                                                                                                                                                                                                                                                                                                                                                                                                                                                                                                                                                                                                                                                                                                                                                                                                                | Department of Microbiology, AHEPA University Hospital                                                                                                                                                                                                                                                                                                                                                                                                                | Institute of Applied Biosciences, Centre for Research and Technology Hellas                                                                                                                      | Anastasia Chatzidimitriou et al.                                                                                                                                                                                                                                                                                                                                                                                                                                                                                                                                                                                                                                                                                                                                                      |
| EPI_ISL_2234836, EPI_ISL_2234864                                                                                                                                                                                                                                                                                                                                                                                                                                                                                                                                                                                                                                                                                                                                                                                                                                                                                                                                                                                                                                                                                                                                                                                                                                                                                                                                                                                                                                                                                                                                                                                                                                                                                                                                                                                                                                                                                                                                                                                                                                                                                                                                                                                                                                                                                                                                                                                                                                                                                                                                                                                                                                                                                                                                                                                                                                                                                                                                                                                                                                                                                                                                                                                                                                                                                                                                                                                                                                                                                                                                                                                                                                                                                                                                                                                                                                                                                                                               | City of Milwaukee Health Department Laboratory                                                                                                                                                                                                                                                                                                                                                                                                                       | City of Milwaukee Health Department Laboratory                                                                                                                                                   | Sanjib Bhattacharyya, Manjeet Khubbar, Amy Bauer, Jennifer Lentz, Samantha Scott                                                                                                                                                                                                                                                                                                                                                                                                                                                                                                                                                                                                                                                                                                      |
| EPI_ISL_2235048                                                                                                                                                                                                                                                                                                                                                                                                                                                                                                                                                                                                                                                                                                                                                                                                                                                                                                                                                                                                                                                                                                                                                                                                                                                                                                                                                                                                                                                                                                                                                                                                                                                                                                                                                                                                                                                                                                                                                                                                                                                                                                                                                                                                                                                                                                                                                                                                                                                                                                                                                                                                                                                                                                                                                                                                                                                                                                                                                                                                                                                                                                                                                                                                                                                                                                                                                                                                                                                                                                                                                                                                                                                                                                                                                                                                                                                                                                                                                | Pandemic Response Lab - NYC                                                                                                                                                                                                                                                                                                                                                                                                                                          | Pandemic Response Lab, R&D                                                                                                                                                                       | Henry Lee, Michael Hammerling, Melissa Hopkins, Cybill del Castillo, Shinyoung Clair Kang, William Ward, Pradeep Bugga, Sol Rey, Dylan Law, Katharine Nelson, Haiping Hao, Jon Laurent                                                                                                                                                                                                                                                                                                                                                                                                                                                                                                                                                                                                |
| EPI_ISL_2235649, EPI_ISL_2236519, EPI_ISL_2236628, EPI_ISL_2236673, EPI_ISL_2236694, EPI_ISL_2236721, EPI_ISL_2237457, EPI_ISL_2237471, EPI_ISL_2237603                                                                                                                                                                                                                                                                                                                                                                                                                                                                                                                                                                                                                                                                                                                                                                                                                                                                                                                                                                                                                                                                                                                                                                                                                                                                                                                                                                                                                                                                                                                                                                                                                                                                                                                                                                                                                                                                                                                                                                                                                                                                                                                                                                                                                                                                                                                                                                                                                                                                                                                                                                                                                                                                                                                                                                                                                                                                                                                                                                                                                                                                                                                                                                                                                                                                                                                                                                                                                                                                                                                                                                                                                                                                                                                                                                                                        | Lighthouse Lab in Milton Keynes                                                                                                                                                                                                                                                                                                                                                                                                                                      | Wellcome Sanger Institute for the COVID-19 Genomics UK (COG-UK) Consortium                                                                                                                       | The Lighthouse Lab in Milton Keynes and Alex Alderton, Roberto Amato, Jeffrey Barrett, Sonia Goncalves, Ewan Harrison, David K. Jackson, Ian Johnston, Dominic Kwiatkowski, Cordelia Langford, John Sillitoe on behalf of the Wellcome Sanger Institute COVID-19 Surveillance Team                                                                                                                                                                                                                                                                                                                                                                                                                                                                                                    |
| EPI_ISL_2240667, EPI_ISL_2240669                                                                                                                                                                                                                                                                                                                                                                                                                                                                                                                                                                                                                                                                                                                                                                                                                                                                                                                                                                                                                                                                                                                                                                                                                                                                                                                                                                                                                                                                                                                                                                                                                                                                                                                                                                                                                                                                                                                                                                                                                                                                                                                                                                                                                                                                                                                                                                                                                                                                                                                                                                                                                                                                                                                                                                                                                                                                                                                                                                                                                                                                                                                                                                                                                                                                                                                                                                                                                                                                                                                                                                                                                                                                                                                                                                                                                                                                                                                               | Centre for Enzyme Innovation, University of Portsmouth / Translational Research Laboratory, Portsmouth Hospitals NHS Trust / Hampshire Hospitals NHS Foundation Trust / Bournemouth University / University Hospitals Dorset NHS Foundation Trust / Brighton and Sussex University Hospitals NHS Trust / Dartford and Gravesham NHS Trust / Isle of Wight NHS Trust / Maidstone and Tunbridge Wells NHS Trust / University Hospital Southampton NHS Foundation Trust | COVID-19 Genomics UK (COG-UK) Consortium                                                                                                                                                         | Samuel Robson, Angela Beckett, Salman Goudarzi, Christopher Fearn, Kate Cook, Katie Loveson, Sharon Glaysher, Scott Elliott, Kelly Bicknell, Sarah Wylie, Allyson Lloyd, Robert Impey, Anoop Chauhan, Stephen Kidd, Nathan Moore, Nick Cortes, Claire Thomas, Anna Mantzouratou, Sarah Buchan, Magdalena Barrow, Andrew Butt, Liz Sheridan, Jonnie Seymour, Dorian Crudgington, Ben Macklin, Mohammed Hassan-Ibrahim, Cassandra Malone, Benjamin Cogger, Kevin Tucker, Samirakhon Raupova, Rachael Jeremiah, Anibolina Castigador, Emily Macnaughton, Karen Withell, Kordo Saeed, Jacqui Prieto, Adhyana Mahanama, Buddhini Samaraweera, Siona Siliveri, Emanuela Pelosi, Eleri Wilson-Davies, Sarah Jeremiah, Helen Wheeler, Matthew Harvey, Thea Sass, Helen Umpleby, Stephen Aplin |
| EPI_ISL_2240747                                                                                                                                                                                                                                                                                                                                                                                                                                                                                                                                                                                                                                                                                                                                                                                                                                                                                                                                                                                                                                                                                                                                                                                                                                                                                                                                                                                                                                                                                                                                                                                                                                                                                                                                                                                                                                                                                                                                                                                                                                                                                                                                                                                                                                                                                                                                                                                                                                                                                                                                                                                                                                                                                                                                                                                                                                                                                                                                                                                                                                                                                                                                                                                                                                                                                                                                                                                                                                                                                                                                                                                                                                                                                                                                                                                                                                                                                                                                                | Laboratory of Clinical Microbiology, Virology and Bioemergencies, ASST Fatebenefratelli Sacco - Sacco Hospital                                                                                                                                                                                                                                                                                                                                                       | Laboratory of Clinical Microbiology, Virology and Bioemergencies, ASST Fatebenefratelli Sacco - Sacco Hospital                                                                                   | Valeria Micheli, Alessandro Mancon, Alberto Rizzo, Fiorenza Bracchitta, Luca Rizzuto, Maria Rita Gismondo                                                                                                                                                                                                                                                                                                                                                                                                                                                                                                                                                                                                                                                                             |
| EPI_ISL_2240751, EPI_ISL_2240760, EPI_ISL_2240763, EPI_ISL_2240774, EPI_ISL_2240780                                                                                                                                                                                                                                                                                                                                                                                                                                                                                                                                                                                                                                                                                                                                                                                                                                                                                                                                                                                                                                                                                                                                                                                                                                                                                                                                                                                                                                                                                                                                                                                                                                                                                                                                                                                                                                                                                                                                                                                                                                                                                                                                                                                                                                                                                                                                                                                                                                                                                                                                                                                                                                                                                                                                                                                                                                                                                                                                                                                                                                                                                                                                                                                                                                                                                                                                                                                                                                                                                                                                                                                                                                                                                                                                                                                                                                                                            | Nigeria Centre for Disease Control (NCDC)                                                                                                                                                                                                                                                                                                                                                                                                                            | African Centre of Excellence for Genomics of Infectious Diseases (ACEGID), Redeemer's University                                                                                                 | Olawoye, I.B., Oluniyi, P.E., Eromon, P.E., Oguzie, J.U., Kayode, A.T., Uwanibe, J.N., Ugwu, C.A., Akano, K.O., Ajogbasile, F.V., Abechi, P.S., Olumade, T.J., Nosamiefan, I., Folarin, O., Happi, C.T.                                                                                                                                                                                                                                                                                                                                                                                                                                                                                                                                                                               |
| EPI_ISL_2240837, EPI_ISL_2240861, EPI_ISL_2240918, EPI_ISL_2240924, EPI_ISL_2240934, EPI_ISL_2240966, EPI_ISL_2240982, EPI_ISL_2241073, EPI_ISL_2241076, EPI_ISL_2241104, EPI_ISL_2241108, EPI_ISL_2241124, EPI_ISL_2241306                                                                                                                                                                                                                                                                                                                                                                                                                                                                                                                                                                                                                                                                                                                                                                                                                                                                                                                                                                                                                                                                                                                                                                                                                                                                                                                                                                                                                                                                                                                                                                                                                                                                                                                                                                                                                                                                                                                                                                                                                                                                                                                                                                                                                                                                                                                                                                                                                                                                                                                                                                                                                                                                                                                                                                                                                                                                                                                                                                                                                                                                                                                                                                                                                                                                                                                                                                                                                                                                                                                                                                                                                                                                                                                                    | see above                                                                                                                                                                                                                                                                                                                                                                                                                                                            | National Virus Reference Laboratory                                                                                                                                                              | Zoe Yandle, Charlene Bennett, Gabriel Gonzalez, Michael Carr, Jonathan Dean, Cillian F De Gascun                                                                                                                                                                                                                                                                                                                                                                                                                                                                                                                                                                                                                                                                                      |
| EPI_ISL_2242544                                                                                                                                                                                                                                                                                                                                                                                                                                                                                                                                                                                                                                                                                                                                                                                                                                                                                                                                                                                                                                                                                                                                                                                                                                                                                                                                                                                                                                                                                                                                                                                                                                                                                                                                                                                                                                                                                                                                                                                                                                                                                                                                                                                                                                                                                                                                                                                                                                                                                                                                                                                                                                                                                                                                                                                                                                                                                                                                                                                                                                                                                                                                                                                                                                                                                                                                                                                                                                                                                                                                                                                                                                                                                                                                                                                                                                                                                                                                                | IN State Department of Health Laboratory Services                                                                                                                                                                                                                                                                                                                                                                                                                    | IN State Department of Health Laboratory Services                                                                                                                                                | Cassandra Campion, Jamie Yeadon, Brian Pope, Lixia Liu, Kyle Brownlee, Melissa Hindenlang, Mark Glazier                                                                                                                                                                                                                                                                                                                                                                                                                                                                                                                                                                                                                                                                               |
| EPI_ISL_2246819, EPI_ISL_2246821, EPI_ISL_2246822                                                                                                                                                                                                                                                                                                                                                                                                                                                                                                                                                                                                                                                                                                                                                                                                                                                                                                                                                                                                                                                                                                                                                                                                                                                                                                                                                                                                                                                                                                                                                                                                                                                                                                                                                                                                                                                                                                                                                                                                                                                                                                                                                                                                                                                                                                                                                                                                                                                                                                                                                                                                                                                                                                                                                                                                                                                                                                                                                                                                                                                                                                                                                                                                                                                                                                                                                                                                                                                                                                                                                                                                                                                                                                                                                                                                                                                                                                              | National Virus Reference Laboratory                                                                                                                                                                                                                                                                                                                                                                                                                                  | National Virus Reference Laboratory                                                                                                                                                              | Zoe Yandle, Charlene Bennett, Gabriel Gonzalez, Michael Carr, Jonathan Dean, Cillian F De Gascun                                                                                                                                                                                                                                                                                                                                                                                                                                                                                                                                                                                                                                                                                      |
| EPI_ISL_2249057                                                                                                                                                                                                                                                                                                                                                                                                                                                                                                                                                                                                                                                                                                                                                                                                                                                                                                                                                                                                                                                                                                                                                                                                                                                                                                                                                                                                                                                                                                                                                                                                                                                                                                                                                                                                                                                                                                                                                                                                                                                                                                                                                                                                                                                                                                                                                                                                                                                                                                                                                                                                                                                                                                                                                                                                                                                                                                                                                                                                                                                                                                                                                                                                                                                                                                                                                                                                                                                                                                                                                                                                                                                                                                                                                                                                                                                                                                                                                | unknown                                                                                                                                                                                                                                                                                                                                                                                                                                                              | Instituto Nacional de Saude (INSA) and Institute of Biomedicine (iBiMed), Universidade de Aveiro                                                                                                 | Borges et al                                                                                                                                                                                                                                                                                                                                                                                                                                                                                                                                                                                                                                                                                                                                                                          |
| EPI_ISL_2250169                                                                                                                                                                                                                                                                                                                                                                                                                                                                                                                                                                                                                                                                                                                                                                                                                                                                                                                                                                                                                                                                                                                                                                                                                                                                                                                                                                                                                                                                                                                                                                                                                                                                                                                                                                                                                                                                                                                                                                                                                                                                                                                                                                                                                                                                                                                                                                                                                                                                                                                                                                                                                                                                                                                                                                                                                                                                                                                                                                                                                                                                                                                                                                                                                                                                                                                                                                                                                                                                                                                                                                                                                                                                                                                                                                                                                                                                                                                                                | Oregon State Public Health Laboratory                                                                                                                                                                                                                                                                                                                                                                                                                                | Oregon State Public Health Laboratory                                                                                                                                                            | Rafia Razzaque, Eugene Yeboah, Vanda Makris, Laura Tsaknaridis, John Fontana and Shane Sevey                                                                                                                                                                                                                                                                                                                                                                                                                                                                                                                                                                                                                                                                                          |
| EPI_ISL_2250227                                                                                                                                                                                                                                                                                                                                                                                                                                                                                                                                                                                                                                                                                                                                                                                                                                                                                                                                                                                                                                                                                                                                                                                                                                                                                                                                                                                                                                                                                                                                                                                                                                                                                                                                                                                                                                                                                                                                                                                                                                                                                                                                                                                                                                                                                                                                                                                                                                                                                                                                                                                                                                                                                                                                                                                                                                                                                                                                                                                                                                                                                                                                                                                                                                                                                                                                                                                                                                                                                                                                                                                                                                                                                                                                                                                                                                                                                                                                                | Microbiological Diagnostic Unit - Public Health Laboratory (MDU-PHL)                                                                                                                                                                                                                                                                                                                                                                                                 | Microbiological Diagnostic Unit Public Health Laboratory (MDU-PHL)                                                                                                                               | Seemann T., Sait, M.L., Sherry, N.L.                                                                                                                                                                                                                                                                                                                                                                                                                                                                                                                                                                                                                                                                                                                                                  |
| EPI_ISL_2250388, EPI_ISL_2250479, EPI_ISL_2250487, EPI_ISL_2250488, EPI_ISL_2250495, EPI_ISL_2250506, EPI_ISL_2250734, EPI_ISL_2250736, EPI_ISL_2250744, EPI_ISL_2250745, EPI_ISL_2250754, EPI_ISL_2250760, EPI_ISL_2250761, EPI_ISL_2250773, EPI_ISL_2250774, EPI_ISL_2250776, EPI_ISL_2250777, EPI_ISL_2250778, EPI_ISL_2250782, EPI_ISL_2250783, EPI_ISL_2250787, EPI_ISL_2250802, EPI_ISL_2250804, EPI_ISL_2250807, EPI_ISL_2250813, EPI_ISL_2250830, EPI_ISL_2250832, EPI_ISL_2250835, EPI_ISL_2250844, EPI_ISL_2250851, EPI_ISL_2250852, EPI_ISL_2250854, EPI_ISL_2250859, EPI_ISL_2250937, EPI_ISL_2250939, EPI_ISL_2250943, EPI_ISL_2250952, EPI_ISL_2250959, EPI_ISL_2250960, EPI_ISL_2250961, EPI_ISL_2250963, EPI_ISL_2250972, EPI_ISL_2250974, EPI_ISL_2250985, EPI_ISL_2250989, EPI_ISL_2250990, EPI_ISL_2250992, EPI_ISL_2250993, EPI_ISL_2250994, EPI_ISL_2250995, EPI_ISL_2250999, EPI_ISL_2251017, EPI_ISL_2251018, EPI_ISL_2251025, EPI_ISL_2251028, EPI_ISL_2251033, EPI_ISL_2251041, EPI_ISL_2251043, EPI_ISL_2251046, EPI_ISL_2251053, EPI_ISL_2251057, EPI_ISL_2251060, EPI_ISL_2251061, EPI_ISL_2251065, EPI_ISL_2251067, EPI_ISL_2251070, EPI_ISL_2251078, EPI_ISL_2251082, EPI_ISL_2251092, EPI_ISL_2251093, EPI_ISL_2251119, EPI_ISL_2251123, EPI_ISL_2251123, EPI_ISL_2251123, EPI_ISL_2251141, EPI_ISL_2251145, EPI_ISL_2251151, EPI_ISL_2251152, EPI_ISL_2251153, EPI_ISL_2251157, EPI_ISL_2251177, EPI_ISL_2251186, EPI_ISL_2251187, EPI_ISL_2251196, EPI_ISL_2251200, EPI_ISL_2251201, EPI_ISL_2251206, EPI_ISL_2251227, EPI_ISL_2251230, EPI_ISL_2251237, EPI_ISL_2251247, EPI_ISL_2251275, EPI_ISL_2251281, EPI_ISL_2251286, EPI_ISL_2251293, EPI_ISL_2251297, EPI_ISL_2251299, EPI_ISL_2251306, EPI_ISL_2251307, EPI_ISL_2251308, EPI_ISL_2251309, EPI_ISL_2251310, EPI_ISL_2251311, EPI_ISL_2251313, EPI_ISL_2251334, EPI_ISL_2251341, EPI_ISL_2251354, EPI_ISL_2251365, EPI_ISL_2251366, EPI_ISL_2251367, EPI_ISL_2251371, EPI_ISL_2251372, EPI_ISL_2251381, EPI_ISL_2251384, EPI_ISL_2251389, EPI_ISL_2251394, EPI_ISL_2251400, EPI_ISL_2251405, EPI_ISL_2251425, EPI_ISL_2251431, EPI_ISL_2251432, EPI_ISL_2251433, EPI_ISL_2251442, EPI_ISL_2251443, EPI_ISL_2251449, EPI_ISL_2251450, EPI_ISL_2251459, EPI_ISL_2251460, EPI_ISL_2251461, EPI_ISL_2251467, EPI_ISL_2251469, EPI_ISL_2251471, EPI_ISL_2251472, EPI_ISL_2251475, EPI_ISL_2251484, EPI_ISL_2251485, EPI_ISL_2251489, EPI_ISL_2251504, EPI_ISL_2251505, EPI_ISL_2251506, EPI_ISL_2251507, EPI_ISL_2251509, EPI_ISL_2251511, EPI_ISL_2251512, EPI_ISL_2251537, EPI_ISL_2251548, EPI_ISL_2251556, EPI_ISL_2251557, EPI_ISL_2251558, EPI_ISL_2251560, EPI_ISL_2251566, EPI_ISL_2251570, EPI_ISL_2251578, EPI_ISL_2251590, EPI_ISL_2251592, EPI_ISL_2251632, EPI_ISL_2251634, EPI_ISL_2251635, EPI_ISL_2251640, EPI_ISL_2251642, EPI_ISL_2251645, EPI_ISL_2251648, EPI_ISL_2251650, EPI_ISL_2251653, EPI_ISL_2251661, EPI_ISL_2251662, EPI_ISL_2251670, EPI_ISL_2251694, EPI_ISL_2251723, EPI_ISL_2251724, EPI_ISL_2251728, EPI_ISL_2251752, EPI_ISL_2251754, EPI_ISL_2251767, EPI_ISL_2251776, EPI_ISL_2251778, EPI_ISL_2251781, EPI_ISL_2251782, EPI_ISL_2251790, EPI_ISL_2252510, EPI_ISL_2252518, EPI_ISL_2252524, EPI_ISL_2252528, EPI_ISL_2252532, EPI_ISL_2252546, EPI_ISL_2252547, EPI_ISL_2252839, EPI_ISL_2252840, EPI_ISL_2252841, EPI_ISL_2252842, EPI_ISL_2252844, EPI_ISL_2252846, EPI_ISL_2252851, EPI_ISL_2252852, EPI_ISL_2252891, EPI_ISL_2252896, EPI_ISL_2252901, EPI_ISL_2252903, EPI_ISL_2252904, EPI_ISL_2252917, EPI_ISL_2252919, EPI_ISL_2252924, EPI_ISL_2252925, EPI_ISL_2252932, EPI_ISL_2252934, EPI_ISL_2252936, EPI_ISL_2252939, EPI_ISL_2252943, EPI_ISL_2252963, EPI_ISL_2252967, EPI_ISL_2252980, EPI_ISL_2252984, EPI_ISL_2252990, EPI_ISL_2252992, EPI_ISL_2252999, EPI_ISL_2253004, EPI_ISL_2253005, EPI_ISL_2253008, EPI_ISL_2253010, EPI_ISL_2253013, EPI_ISL_2253017, EPI_ISL_2253018, EPI_ISL_2253047, EPI_ISL_2253048 | see above                                                                                                                                                                                                                                                                                                                                                                                                                                                            | Public Health Ontario Laboratory                                                                                                                                                                 | Vanessa G Allen, Philip Banh, Yao Chen, Richard de Borja, Alireza Eshaghi, Nahuel Fittipaldi, Christine Frantz, Jonathan B Gubbay, Jennifer L Guthrie, Lawrence Heisler, Esha Joshi, Michael Laszloffy, Aimin Li, Dean Maxwell, Sandeep Nagra, Samir N Patel, Jared Simpson, Karthikeyan Sivaraman, Ashleigh Sullivan, Yogi Sundaravadanam, Sarah Teatero, Andre Villegas, Matthew Watson, Sandra Zittermann                                                                                                                                                                                                                                                                                                                                                                          |
| EPI_ISL_2254057                                                                                                                                                                                                                                                                                                                                                                                                                                                                                                                                                                                                                                                                                                                                                                                                                                                                                                                                                                                                                                                                                                                                                                                                                                                                                                                                                                                                                                                                                                                                                                                                                                                                                                                                                                                                                                                                                                                                                                                                                                                                                                                                                                                                                                                                                                                                                                                                                                                                                                                                                                                                                                                                                                                                                                                                                                                                                                                                                                                                                                                                                                                                                                                                                                                                                                                                                                                                                                                                                                                                                                                                                                                                                                                                                                                                                                                                                                                                                | Lighthouse Lab in Milton Keynes                                                                                                                                                                                                                                                                                                                                                                                                                                      | Wellcome Sanger Institute for the COVID-19 Genomics UK (COG-UK) Consortium                                                                                                                       | The Lighthouse Lab in Milton Keynes and Alex Alderton, Roberto Amato, Jeffrey Barrett, Sonia Goncalves, Ewan Harrison, David K. Jackson, Ian Johnston, Dominic Kwiatkowski, Cordelia Langford, John Sillitoe on behalf of the Wellcome Sanger Institute COVID-19 Surveillance Team                                                                                                                                                                                                                                                                                                                                                                                                                                                                                                    |
| EPI_ISL_2258426, EPI_ISL_2258526, EPI_ISL_2258531, EPI_ISL_2258695                                                                                                                                                                                                                                                                                                                                                                                                                                                                                                                                                                                                                                                                                                                                                                                                                                                                                                                                                                                                                                                                                                                                                                                                                                                                                                                                                                                                                                                                                                                                                                                                                                                                                                                                                                                                                                                                                                                                                                                                                                                                                                                                                                                                                                                                                                                                                                                                                                                                                                                                                                                                                                                                                                                                                                                                                                                                                                                                                                                                                                                                                                                                                                                                                                                                                                                                                                                                                                                                                                                                                                                                                                                                                                                                                                                                                                                                                             | Department of Virology and Immunology, University of Helsinki and Helsinki University Hospital, HUSLAB Finland                                                                                                                                                                                                                                                                                                                                                       | Department of Virology, Faculty of Medicine, University of Helsinki, Helsinki, Finland                                                                                                           | Teemu Smura, Ravi Kant, Phuoc Truong, Hussein Alburkat, Hannimari Kallio-Kokko, Jenni Virtanen, Maija Suvaanto, Essi Korhonen, Sari Hannula, Harri Kangas, Hanna Liimatainen, Satu Kurkela, Hanna Jarva, Maija Lappalainen, Pekka Ellonen, Olli Vapalahti                                                                                                                                                                                                                                                                                                                                                                                                                                                                                                                             |
| EPI_ISL_2270161                                                                                                                                                                                                                                                                                                                                                                                                                                                                                                                                                                                                                                                                                                                                                                                                                                                                                                                                                                                                                                                                                                                                                                                                                                                                                                                                                                                                                                                                                                                                                                                                                                                                                                                                                                                                                                                                                                                                                                                                                                                                                                                                                                                                                                                                                                                                                                                                                                                                                                                                                                                                                                                                                                                                                                                                                                                                                                                                                                                                                                                                                                                                                                                                                                                                                                                                                                                                                                                                                                                                                                                                                                                                                                                                                                                                                                                                                                                                                | Synlab Suisse SA                                                                                                                                                                                                                                                                                                                                                                                                                                                     | Clinical Bacteriology                                                                                                                                                                            | Tim Roloff, Madlen Stange, Helena MB Seth-Smith, Alfredo Mari, Karoline Leuzinger, Julia Bielicki, Manuel Battegay, Hans Hirsch, Adrian Egli                                                                                                                                                                                                                                                                                                                                                                                                                                                                                                                                                                                                                                          |
| EPI_ISL_2273447                                                                                                                                                                                                                                                                                                                                                                                                                                                                                                                                                                                                                                                                                                                                                                                                                                                                                                                                                                                                                                                                                                                                                                                                                                                                                                                                                                                                                                                                                                                                                                                                                                                                                                                                                                                                                                                                                                                                                                                                                                                                                                                                                                                                                                                                                                                                                                                                                                                                                                                                                                                                                                                                                                                                                                                                                                                                                                                                                                                                                                                                                                                                                                                                                                                                                                                                                                                                                                                                                                                                                                                                                                                                                                                                                                                                                                                                                                                                                | National Laboratory for Health, Environment and Food, OMM, Novo mesto                                                                                                                                                                                                                                                                                                                                                                                                | NLZOH (National Laboratory for Health, Environment and Food) / CISLD (Clinical Institute of Special Laboratory Diagnostics), University Children's Hospital, University Medical Center Ljubljana | Sandra Janezic, Aleksander Mahnic, Maja Rupnik, Tjasa Žohar retrnik, Alenka Štorman, Nika Gobec, Aleksander Kocuvan, Kaja Tominc, Maša Jari, David Cvetko, Tatjana Harlander, Matjaž Retelj / Jernej Kova, Barbara Jenko Bizjan, Tine Tesovnik, Robert Šket, Katarina Kozmos, Ana Grom, Maruša Debeljak, Marko Pokorn, Tadej Battelino                                                                                                                                                                                                                                                                                                                                                                                                                                                |
| EPI_ISL_2275029, EPI_ISL_2275064, EPI_ISL_2275404, EPI_ISL_2275405                                                                                                                                                                                                                                                                                                                                                                                                                                                                                                                                                                                                                                                                                                                                                                                                                                                                                                                                                                                                                                                                                                                                                                                                                                                                                                                                                                                                                                                                                                                                                                                                                                                                                                                                                                                                                                                                                                                                                                                                                                                                                                                                                                                                                                                                                                                                                                                                                                                                                                                                                                                                                                                                                                                                                                                                                                                                                                                                                                                                                                                                                                                                                                                                                                                                                                                                                                                                                                                                                                                                                                                                                                                                                                                                                                                                                                                                                             | Lighthouse Lab in Milton Keynes                                                                                                                                                                                                                                                                                                                                                                                                                                      | Wellcome Sanger Institute for the COVID-19 Genomics UK (COG-UK) Consortium                                                                                                                       | The Lighthouse Lab in Milton Keynes and Alex Alderton, Roberto Amato, Jeffrey Barrett, Sonia Goncalves, Ewan Harrison, David K. Jackson, Ian Johnston, Dominic Kwiatkowski, Cordelia Langford, John Sillitoe on behalf of the Wellcome Sanger Institute COVID-19 Surveillance Team                                                                                                                                                                                                                                                                                                                                                                                                                                                                                                    |
| EPI_ISL_2277701, EPI_ISL_2277731                                                                                                                                                                                                                                                                                                                                                                                                                                                                                                                                                                                                                                                                                                                                                                                                                                                                                                                                                                                                                                                                                                                                                                                                                                                                                                                                                                                                                                                                                                                                                                                                                                                                                                                                                                                                                                                                                                                                                                                                                                                                                                                                                                                                                                                                                                                                                                                                                                                                                                                                                                                                                                                                                                                                                                                                                                                                                                                                                                                                                                                                                                                                                                                                                                                                                                                                                                                                                                                                                                                                                                                                                                                                                                                                                                                                                                                                                                                               | Institute for Infectious Diseases                                                                                                                                                                                                                                                                                                                                                                                                                                    | Institute for Infectious Diseases                                                                                                                                                                | Stefan Neuenschwander, Christian Baumann, Miguel A Terrazos Miani, Cora Sägesser, Pascal Bittel, Peter Keller, Franziska Suter-Riniker, Stephen L Leib, Alban Ramette                                                                                                                                                                                                                                                                                                                                                                                                                                                                                                                                                                                                                 |
| EPI_ISL_2278746                                                                                                                                                                                                                                                                                                                                                                                                                                                                                                                                                                                                                                                                                                                                                                                                                                                                                                                                                                                                                                                                                                                                                                                                                                                                                                                                                                                                                                                                                                                                                                                                                                                                                                                                                                                                                                                                                                                                                                                                                                                                                                                                                                                                                                                                                                                                                                                                                                                                                                                                                                                                                                                                                                                                                                                                                                                                                                                                                                                                                                                                                                                                                                                                                                                                                                                                                                                                                                                                                                                                                                                                                                                                                                                                                                                                                                                                                                                                                | URMC LABS                                                                                                                                                                                                                                                                                                                                                                                                                                                            | Wadsworth Center, New York State Department of Health                                                                                                                                            | Kirsten St. George, Daryl M. Lamson, Alexis Russell, Matthew Shudt, Melissa A Leisner, Jonathan Pitnick, Catharine Prussing, Navjot Singh, John Kelly, Erasmus Schneider, Erica Lasek-Nesselquist                                                                                                                                                                                                                                                                                                                                                                                                                                                                                                                                                                                     |

|                                                                                                                                                                                           |           |                                                                                             |                                                                                                        |                                                                                                                                                                                                                                                                                                                                                                                                                                                                                                        |
|-------------------------------------------------------------------------------------------------------------------------------------------------------------------------------------------|-----------|---------------------------------------------------------------------------------------------|--------------------------------------------------------------------------------------------------------|--------------------------------------------------------------------------------------------------------------------------------------------------------------------------------------------------------------------------------------------------------------------------------------------------------------------------------------------------------------------------------------------------------------------------------------------------------------------------------------------------------|
| EPI_ISL_2279028, EPI_ISL_2279069, EPI_ISL_2279070, EPI_ISL_2279092, EPI_ISL_2279109, EPI_ISL_2279159, EPI_ISL_2279187, EPI_ISL_2279217, EPI_ISL_2279300, EPI_ISL_2279422, EPI_ISL_2279469 | see above | Wisconsin State Laboratory of Hygiene Communicable Disease Division                         | Wisconsin State Laboratory of Hygiene Communicable Disease Division                                    | Abigail C. Shockey, Alicia J. Mooney, Erika M. Hanson, Tonya Danz, Richard Griesser, Sara Wagner, Kelsey R. Florek                                                                                                                                                                                                                                                                                                                                                                                     |
| EPI_ISL_2280025, EPI_ISL_2280031, EPI_ISL_2280056, EPI_ISL_2280057, EPI_ISL_2280066                                                                                                       |           | TXDSHS                                                                                      | TXDSHS                                                                                                 | Rashmi Tuladhar, Bonnie Oh, Jenny Zhang, Maliha Rahman, Mayela Pedrueza, Anita Pokharel, Karen Bobier, Lorraine Rodriguez, Myong Koag, Chun Wang, Rachel Lee, Grace Kubin                                                                                                                                                                                                                                                                                                                              |
| EPI_ISL_2285316, EPI_ISL_2285317                                                                                                                                                          |           | Nigeria Centre for Disease Control (NCDC)                                                   | African Centre of Excellence for Genomics of Infectious Diseases (ACEGID), Redeemer's University       | Olawoye, I.B., Oluniyi, P.E., Eromon, P.E., Oguzie, J.U., Kayode, A.T., Uwanibe, J.N., Ugwu, C.A., Akano, K.O., Ajogbasile, F.V., Abechi, P.S., Olumade, T.J., Nosamiefan, I., Folarin, O., Happi, C.T.                                                                                                                                                                                                                                                                                                |
| EPI_ISL_2285856, EPI_ISL_2285861                                                                                                                                                          |           | National Influenza Centre                                                                   | National Influenza Centre                                                                              | William K. Ampofo, Michael Marks, Ivy A. Asante, Sharon Hsu, Benjamin B. Lindsey, Benjamin H. Foulkes, Mildred Adusei-Poku, Linda Boatemaa, Lorreta Kwasaah, Joseph Oliver-Commey, Ernest Asiedu, Franklin Asiedu-Bekoe, Gordon Awandare, Joyce Ngoi, Dennis Laryea, Mathew D. Parker, Thushan I de Silva,                                                                                                                                                                                             |
| EPI_ISL_2286100, EPI_ISL_2286166, EPI_ISL_2286745, EPI_ISL_2286746                                                                                                                        |           | MEPHI, Aix Marseille University                                                             | MEPHI, Aix Marseille University                                                                        | Anthony LEVASSEUR                                                                                                                                                                                                                                                                                                                                                                                                                                                                                      |
| EPI_ISL_2287807, EPI_ISL_2287810, EPI_ISL_2287876, EPI_ISL_2287928                                                                                                                        |           | San Juan Regional Medical Center                                                            | New Mexico Department of Health Scientific Laboratory                                                  | Ellie Johnson, Anastacia Griego-Fisher, D'eltra Malone, Jennifer Benoit                                                                                                                                                                                                                                                                                                                                                                                                                                |
| EPI_ISL_2291248, EPI_ISL_2292802, EPI_ISL_2292814, EPI_ISL_2292825, EPI_ISL_2292830, EPI_ISL_2292860, EPI_ISL_2292861, EPI_ISL_2292875, EPI_ISL_2292962                                   |           | Utah Public Health Laboratory                                                               | Utah Public Health Laboratory                                                                          | Erin L. Young, Kelly F. Oakeson, Tara Gallagher                                                                                                                                                                                                                                                                                                                                                                                                                                                        |
| EPI_ISL_2293276                                                                                                                                                                           |           | Hospital                                                                                    | National Reference Center for Viruses of Respiratory Infections, Institut Pasteur, Paris               | Marion Barbet, Sylvie Behillil, Méline Bizard, Angela Brisebarre, Camille Capel, Vincent Enouf, Louise Lefrançois, Frédéric Lemoine, Christophe Malabat, Corinne Maufrais, Etienne Simon-Lorière, Maud Vanpeene, Sylvie Van der Werf, Jacques Fourgeaud                                                                                                                                                                                                                                                |
| EPI_ISL_2302116, EPI_ISL_2302117, EPI_ISL_2302140, EPI_ISL_2302161                                                                                                                        |           | Greek Genome Center, Biomedical Research Foundation of the Academy of Athens (BRFAA)        | Greek Genome Center, Biomedical Research Foundation of the Academy of Athens (BRFAA)                   | Emmanouil Athanasiadis, Giannis Vatsellas, Theodoros Loupis, Katerina Zoi, Dimitrios Thanos                                                                                                                                                                                                                                                                                                                                                                                                            |
| EPI_ISL_2303940                                                                                                                                                                           |           | Dutch COVID-19 response team                                                                | National Institute for Public Health and the Environment (RIVM)                                        | Adam Meijer, Harry Vennema, Dirk Eggink, Jeroen Cremer, Sharon van den Brink, Bas van der Veer, AnneMarie van den Brandt, Lisa Wijsman, Kim Freniks, Rianne Jaarsma, Eunice Then, Lynn Aarts, Sanne Bos, Melissa van Tuil, Linda van de Nes, Sjoerd Kulling, James Groot, Florian Zwagemaker, Dennis Schmitz, Annelies Kroneman, Karim Hajji, Chantal Reusken, on behalf of the national COVID-19 response team                                                                                        |
| EPI_ISL_2304306                                                                                                                                                                           |           | PathWest Laboratory Medicine WA                                                             | PathWest Laboratory Medicine WA Microbial Surveillance Unit                                            | PathWest Laboratory Medicine WA Microbial Surveillance Unit                                                                                                                                                                                                                                                                                                                                                                                                                                            |
| EPI_ISL_2307591, EPI_ISL_2307597, EPI_ISL_2307650, EPI_ISL_2307724                                                                                                                        |           | Viollier AG                                                                                 | Department of Biosystems Science and Engineering, ETH Zürich                                           | Christian Beisel, Sarah Nadeau, Chaoran Chen, Ivan Topolsky, Philipp Jablonski, Lara Fuhrmann, David Dreifuss, Katharina Jahn, Rebecca Denes, Mirjam Feldkamp, Ina Nissen, Natascha Santacroce, Elodie Burcklen, Christiane Beckmann, Maurice Redondo, Olivier Kobel, Christoph Noppen, Sophie Seidel, Noemie Santamaria de Souza, Niko Beerenwinkel, Tanja Stadler                                                                                                                                    |
| EPI_ISL_2307784                                                                                                                                                                           |           | Viollier AG                                                                                 | Department of Biosystems Science and Engineering, ETH Zürich                                           | Chaoran Chen, Sarah Nadeau, Catharine Aquino, Ivan Topolsky, Philipp Jablonski, Lara Fuhrmann, David Dreifuss, Katharina Jahn, Daniel Ehrsam, Isabel Stürmer, Andrea Cabral de Gouvea, Maria Domenica Moccia, Simon Grüter, Timothy Sykes, Lennart Opitz, Griffin White, Laura Neff, Doris Popovic, Andrea Patrignani, Jay Tracy, Ralph Schlapbach, Christiane Beckmann, Maurice Redondo, Olivier Kobel, Christoph Noppen, Sophie Seidel, Noemie Santamaria de Souza, Niko Beerenwinkel, Tanja Stadler |
| EPI_ISL_2307928                                                                                                                                                                           |           | Viollier AG                                                                                 | Department of Biosystems Science and Engineering, ETH Zürich                                           | Christian Beisel, Sarah Nadeau, Chaoran Chen, Ivan Topolsky, Philipp Jablonski, Lara Fuhrmann, David Dreifuss, Katharina Jahn, Rebecca Denes, Mirjam Feldkamp, Ina Nissen, Natascha Santacroce, Elodie Burcklen, Christiane Beckmann, Maurice Redondo, Olivier Kobel, Christoph Noppen, Sophie Seidel, Noemie Santamaria de Souza, Niko Beerenwinkel, Tanja Stadler                                                                                                                                    |
| EPI_ISL_2307969, EPI_ISL_2308041                                                                                                                                                          |           | Viollier AG                                                                                 | Department of Biosystems Science and Engineering, ETH Zürich                                           | Chaoran Chen, Sarah Nadeau, Catharine Aquino, Ivan Topolsky, Philipp Jablonski, Lara Fuhrmann, David Dreifuss, Katharina Jahn, Daniel Ehrsam, Isabel Stürmer, Andrea Cabral de Gouvea, Maria Domenica Moccia, Simon Grüter, Timothy Sykes, Lennart Opitz, Griffin White, Laura Neff, Doris Popovic, Andrea Patrignani, Jay Tracy, Ralph Schlapbach, Christiane Beckmann, Maurice Redondo, Olivier Kobel, Christoph Noppen, Sophie Seidel, Noemie Santamaria de Souza, Niko Beerenwinkel, Tanja Stadler |
| EPI_ISL_2308263, EPI_ISL_2308264, EPI_ISL_2308265, EPI_ISL_2308270                                                                                                                        |           | Nigeria Centre for Disease Control (NCDC)                                                   | African Centre of Excellence for Genomics of Infectious Diseases (ACEGID), Redeemer's University       | Olawoye, I.B., Oluniyi, P.E., Eromon, P.E., Oguzie, J.U., Kayode, A.T., Uwanibe, J.N., Ugwu, C.A., Akano, K.O., Ajogbasile, F.V., Abechi, P.S., Olumade, T.J., Nosamiefan, I., Folarin, O., Happi, C.T.                                                                                                                                                                                                                                                                                                |
| EPI_ISL_2308350                                                                                                                                                                           |           | Montana Public Health Laboratory                                                            | Montana Public Health Laboratory                                                                       | Joy Ritter, Michelle Mozer, Carrie Biskupiak, Deborah Gibson, Michael Dills                                                                                                                                                                                                                                                                                                                                                                                                                            |
| EPI_ISL_2309762                                                                                                                                                                           |           | Colorado Department of Public Health and Environment                                        | Colorado Department of Public Health and Environment                                                   | Laura Bankers, Molly C. Hetherington-Rauth, Diana Ir, Alexandria Rosshaim, Shannon R. Matzinger, Sarah Elizabeth Totten, Emily A. Travanty                                                                                                                                                                                                                                                                                                                                                             |
| EPI_ISL_2312654                                                                                                                                                                           |           | Greek Genome Center, Biomedical Research Foundation of the Academy of Athens (BRFAA)        | Greek Genome Center, Biomedical Research Foundation of the Academy of Athens (BRFAA)                   | Emmanouil Athanasiadis, Giannis Vatsellas, Theodoros Loupis, Katerina Zoi, Dimitrios Thanos                                                                                                                                                                                                                                                                                                                                                                                                            |
| EPI_ISL_2313340                                                                                                                                                                           |           | Robert Koch-Institut ZBS1                                                                   | Robert Koch Institute                                                                                  | Annika Brinkmann                                                                                                                                                                                                                                                                                                                                                                                                                                                                                       |
| EPI_ISL_2317336, EPI_ISL_2317665                                                                                                                                                          |           | Lighthouse Lab in Milton Keynes                                                             | Wellcome Sanger Institute for the COVID-19 Genomics UK (COG-UK) Consortium                             | The Lighthouse Lab in Milton Keynes and Alex Alderton, Roberto Amato, Jeffrey Barrett, Sonia Goncalves, Ewan Harrison, David K. Jackson, Ian Johnston, Dominic Kwiatkowski, Cordelia Langford, John Sillitoe on behalf of the Wellcome Sanger Institute COVID-19 Surveillance Team                                                                                                                                                                                                                     |
| EPI_ISL_2318903                                                                                                                                                                           |           | Azienda Sanitaria dell'Alto Adige Laboratorio Aziendale di Microbiologia e Virologia        | Istituto di Genomica Applicata                                                                         | Elisabetta Pagani, Irene Bianconi, Elisabetta Giacobazzi, Elisa Masi, Stefanie Wieser, Irena Jurman, Vera Vendramin, Gabriele Magris, Eleonora Paparelli, Davide Scaglione, Michele Morgante                                                                                                                                                                                                                                                                                                           |
| EPI_ISL_2319432                                                                                                                                                                           |           | Maryland Genomics, Institute for Genome Sciences, University of Maryland School of Medicine | Maryland Genomics, Institute for Genome Sciences, University of Maryland School of Medicine            | Tallon, Luke J; Sadzewicz, Lisa D; Humphrys, Mike; Ott, Sandra; Roussey, Holly; Mehta, Aditya; Vavikolanu, Kranthi; Fraser, Claire M; Ravel, Jacques                                                                                                                                                                                                                                                                                                                                                   |
| EPI_ISL_2319783, EPI_ISL_2319785, EPI_ISL_2319814, EPI_ISL_2319859, EPI_ISL_2319872                                                                                                       |           | Reditus Laboratories                                                                        | Reditus Laboratories                                                                                   | Joshua J. Geltz, Ph.D., Robert M. Sgambelluri, Ph.D., Rex Dyer, Ph.D., Cassy Philips, M.S., Alexa Eichelberger, M.S.                                                                                                                                                                                                                                                                                                                                                                                   |
| EPI_ISL_2322769, EPI_ISL_2322774, EPI_ISL_2322779, EPI_ISL_2322845                                                                                                                        |           | New Mexico Department of Health Scientific Laboratory                                       | New Mexico Department of Health Scientific Laboratory                                                  | Ellie Johnson, Anastacia Griego-Fisher, D'eltra Malone, Jennifer Benoit                                                                                                                                                                                                                                                                                                                                                                                                                                |
| EPI_ISL_2324266, EPI_ISL_2324267                                                                                                                                                          |           | ILV Kärnten                                                                                 | Bergthaler laboratory, CeMM Research Center for Molecular Medicine of the Austrian Academy of Sciences | Lukas Endler, Anna Schedl, Fabian Amman, Petr Triska, Thomas Penz, Benedikt Agerer, Maëlle Le Moing, Michael Schuster, Bekir Erguner, Jan Laine, Martin Senekowitsch, Christoph Bock, Andreas Bergthaler                                                                                                                                                                                                                                                                                               |
| EPI_ISL_2324295                                                                                                                                                                           |           | Institute of Legal Medicine, Medical University of Innsbruck                                | Bergthaler laboratory, CeMM Research Center for Molecular Medicine of the Austrian Academy of Sciences | Lukas Endler, Anna Schedl, Fabian Amman, Petr Triska, Thomas Penz, Benedikt Agerer, Maëlle Le Moing, Michael Schuster, Bekir Erguner, Jan Laine, Martin Senekowitsch, Christoph Bock, Andreas Bergthaler                                                                                                                                                                                                                                                                                               |
| EPI_ISL_2325007, EPI_ISL_2325008, EPI_ISL_2325015                                                                                                                                         |           | ULSS 2 Marca Trevigiana                                                                     | Istituto Zooprofilattico Sperimentale delle Venezie                                                    | Adelaide Milani, Alessia Schivo, Annalisa Salviato, Elisa Palumbo, Erika Giorgia Quaranta, Luca Tassoni, Ambra Pastorì, Edoardo Giussani, Alice Fusaro, Isabella Monne, Calogero Terregino, Antonia Ricci                                                                                                                                                                                                                                                                                              |
| EPI_ISL_2332694, EPI_ISL_2332695                                                                                                                                                          |           | Centracare Laboratory Services                                                              | Minnesota Department of Health, Public Health Laboratory                                               | Alexandra Lorentz, Jacob Garfin, Matt Plumb, and Xiong Wang                                                                                                                                                                                                                                                                                                                                                                                                                                            |
| EPI_ISL_2334073                                                                                                                                                                           |           | TXDSHS                                                                                      | TXDSHS                                                                                                 | Rashmi Tuladhar, Bonnie Oh, Jenny Zhang, Maliha Rahman, Mayela Pedrueza, Anita Pokharel, Karen Bobier, Lorraine Rodriguez, Myong Koag, Chun Wang, Rachel Lee, Grace Kubin                                                                                                                                                                                                                                                                                                                              |
| EPI_ISL_2334256                                                                                                                                                                           |           | UAB Diagnostikos laboratorija                                                               | National Public Health Surveillance Laboratory                                                         | Lukas Zemaitis, Migle Gabrielaite, Jelena Raznmuk, Svajune Muralyte, Ana Steponkiene, Lukas Vasionis, Danas Baksa                                                                                                                                                                                                                                                                                                                                                                                      |
| EPI_ISL_2336197                                                                                                                                                                           |           | Washington State Department of Health Public Health                                         | Washington State Department of Health Public Health                                                    | Drew MacKellar, Philip Dykema, Denny Russell, Joenice Gonzalez, Hannah Gray, Geoff Melly, Vanessa De Los Santos, Darren Lucas, JohnAric Peterson,                                                                                                                                                                                                                                                                                                                                                      |

|                                                                                                                                                                                                            | Laboratories                                                                                              | Laboratories                                                                         | Avi Singh, Rebecca Cao                                                                                                                                                                                                                                                                                                                                                                                                                                                                                                                                            |
|------------------------------------------------------------------------------------------------------------------------------------------------------------------------------------------------------------|-----------------------------------------------------------------------------------------------------------|--------------------------------------------------------------------------------------|-------------------------------------------------------------------------------------------------------------------------------------------------------------------------------------------------------------------------------------------------------------------------------------------------------------------------------------------------------------------------------------------------------------------------------------------------------------------------------------------------------------------------------------------------------------------|
| EPI_ISL_2339319, EPI_ISL_2339340                                                                                                                                                                           | Oregon State Public Health Laboratory                                                                     | Oregon State Public Health Laboratory                                                | Rafia Razzaque, Eugene Yeboah, Vanda Makris, Laura Tsaknaridis, John Fontana and Shane Sevey                                                                                                                                                                                                                                                                                                                                                                                                                                                                      |
| EPI_ISL_2339356, EPI_ISL_2339381, EPI_ISL_2339404, EPI_ISL_2339406                                                                                                                                         | Illinois Department of Public Health - Springfield Lab                                                    | Illinois Department of Public Health - Springfield Lab                               | Bryan Sim, Gordon McCall                                                                                                                                                                                                                                                                                                                                                                                                                                                                                                                                          |
| EPI_ISL_2339441                                                                                                                                                                                            | Labor Berlin Charite Vivantes GmbH / Institut fur Virologie                                               | Charite Universitatsmedizin Berlin, Institut fur Virologie/Labor Berlin              | Peter Menzel, Christine Stephan, Rolf Schwarzer, Victor M Corman, Barbara Muhlemann, Terry Jones, Christian Drosten                                                                                                                                                                                                                                                                                                                                                                                                                                               |
| EPI_ISL_2340777                                                                                                                                                                                            | UW Virology Lab                                                                                           | UW Virology Lab                                                                      | Pavitra Roychoudhury, Hong Xie, Lasata Shrestha, Tien V. Nguyen, Shah Mohamed Bakhsh, Michelle Lin, Noah R. Baker, Sean Ellis, Meei-Li Huang, Keith R Jerome, Alexander Greninger                                                                                                                                                                                                                                                                                                                                                                                 |
| EPI_ISL_2341421                                                                                                                                                                                            | Humboldt County Public Health Laboratory                                                                  | Chan-Zuckerberg Biohub                                                               | CZB Ciahub Consortium                                                                                                                                                                                                                                                                                                                                                                                                                                                                                                                                             |
| EPI_ISL_2341466, EPI_ISL_2341519                                                                                                                                                                           | CA DPH Viral and Rickettsial Disease Laboratory                                                           | Chan-Zuckerberg Biohub                                                               | CZB Ciahub Consortium                                                                                                                                                                                                                                                                                                                                                                                                                                                                                                                                             |
| EPI_ISL_2341565, EPI_ISL_2341613                                                                                                                                                                           | Humboldt County Public Health Laboratory                                                                  | Chan-Zuckerberg Biohub                                                               | CZB Ciahub Consortium                                                                                                                                                                                                                                                                                                                                                                                                                                                                                                                                             |
| EPI_ISL_2341615, EPI_ISL_2341638                                                                                                                                                                           | Contra Costa County Public Health Lab                                                                     | Chan-Zuckerberg Biohub                                                               | CZB Ciahub Consortium                                                                                                                                                                                                                                                                                                                                                                                                                                                                                                                                             |
| EPI_ISL_2342521                                                                                                                                                                                            | Institute for Infectious Diseases, University of Bern, Switzerland                                        | Institute for Infectious Diseases, University of Bern, Switzerland                   | Stefan Neuenchwander, Christian Baumann, Miguel A Terrazos Miani, Cora Sägesser, Pascal Bittel, Peter Keller, Franziska Suter-Riniker, Stephen L Leib, Alban Ramette                                                                                                                                                                                                                                                                                                                                                                                              |
| EPI_ISL_2343630, EPI_ISL_2343680, EPI_ISL_2343690                                                                                                                                                          | Greek Genome Center, Biomedical Research Foundation of the Academy of Athens (BRFAA)                      | Greek Genome Center, Biomedical Research Foundation of the Academy of Athens (BRFAA) | Emmanouil Athanasiadis, Giannis Vatsellas, Theodoros Loupis, Katerina Zoi, Dimitrios Thanos                                                                                                                                                                                                                                                                                                                                                                                                                                                                       |
| EPI_ISL_2343922, EPI_ISL_2343934, EPI_ISL_2343941                                                                                                                                                          | Laboratory of Immunohematology, Division of Hematology                                                    | Greek Genome Center, Biomedical Research Foundation of the Academy of Athens (BRFAA) | Emmanouil Athanasiadis, Giannis Vatsellas, Theodoros Loupis, Katerina Zoi, Athanasia Mouzaki, Dimitrios Thanos                                                                                                                                                                                                                                                                                                                                                                                                                                                    |
| EPI_ISL_2343943, EPI_ISL_2343944, EPI_ISL_2343950, EPI_ISL_2343965, EPI_ISL_2343966, EPI_ISL_2343967, EPI_ISL_2343969, EPI_ISL_2343973                                                                     | Greek Genome Center, Biomedical Research Foundation of the Academy of Athens (BRFAA)                      | Greek Genome Center, Biomedical Research Foundation of the Academy of Athens (BRFAA) | Emmanouil Athanasiadis, Giannis Vatsellas, Theodoros Loupis, Katerina Zoi, Dimitrios Thanos                                                                                                                                                                                                                                                                                                                                                                                                                                                                       |
| EPI_ISL_2343999, EPI_ISL_2344021                                                                                                                                                                           | Biopathology - Clinical Microbiology, Department Clinical and Laboratory Research, University of Thessaly | Greek Genome Center, Biomedical Research Foundation of the Academy of Athens (BRFAA) | Emmanouil Athanasiadis, Giannis Vatsellas, Theodoros Loupis, Katerina Zoi, Ethimia Petinaki, Dimitrios Thanos                                                                                                                                                                                                                                                                                                                                                                                                                                                     |
| EPI_ISL_2344040, EPI_ISL_2344045, EPI_ISL_2344050, EPI_ISL_2344054, EPI_ISL_2344059, EPI_ISL_2344063, EPI_ISL_2344064, EPI_ISL_2344081, EPI_ISL_2344093, EPI_ISL_2344135, EPI_ISL_2344178, EPI_ISL_2344180 | Laboratory of Immunohematology, Division of Hematology                                                    | Greek Genome Center, Biomedical Research Foundation of the Academy of Athens (BRFAA) | Emmanouil Athanasiadis, Giannis Vatsellas, Theodoros Loupis, Katerina Zoi, Athanasia Mouzaki, Dimitrios Thanos                                                                                                                                                                                                                                                                                                                                                                                                                                                    |
| see above                                                                                                                                                                                                  | Laboratory of Immunohematology, Division of Hematology                                                    | Greek Genome Center, Biomedical Research Foundation of the Academy of Athens (BRFAA) | Emmanouil Athanasiadis, Giannis Vatsellas, Theodoros Loupis, Katerina Zoi, Dimitrios Thanos                                                                                                                                                                                                                                                                                                                                                                                                                                                                       |
| EPI_ISL_2344190, EPI_ISL_2344195, EPI_ISL_2344222                                                                                                                                                          | Greek Genome Center, Biomedical Research Foundation of the Academy of Athens (BRFAA)                      | Greek Genome Center, Biomedical Research Foundation of the Academy of Athens (BRFAA) | Emmanouil Athanasiadis, Giannis Vatsellas, Theodoros Loupis, Katerina Zoi, Dimitrios Thanos                                                                                                                                                                                                                                                                                                                                                                                                                                                                       |
| EPI_ISL_2344471, EPI_ISL_2344506                                                                                                                                                                           | Virginia Division of Consolidated Laboratory Services                                                     | Virginia Division of Consolidated Laboratory Services                                | Virginia DCLS                                                                                                                                                                                                                                                                                                                                                                                                                                                                                                                                                     |
| EPI_ISL_2344621, EPI_ISL_2344624                                                                                                                                                                           | Prefeitura de SP                                                                                          | Instituto Butantan                                                                   | Dimas Tadeu Covas, Antonio Jorge Martins, Claudia Renata dos Santos Barros, David Schlesinger, Debora Botequio Moretti, Elaine Cristina Marqueze, Elaine Vieira Santos, Evandra Strazza Rodrigues, Heidge Fukumasu, Jayme Augusto de Souza-Neto, José Salvatore Leister Patané, Luiz Alcantara, Luiz Lehmann Coutinho, Maria Carolina Elias, Maurício Lacerda Nogueira, Rafael dos Santos Bezerra, Raul Machado Neto, Rejane Maria Tommasini Grotto, Ricardo Haddad, Sandra Coccuzzo Sampaio Vessoni, Simone Kashima, Svetoslav Nanev Slavov, Vincent Louis Viala |
| EPI_ISL_2345082                                                                                                                                                                                            | HOSPITAL GERAL JESUS TEIXEIRA DA COSTA GUAIANASES SAO PAULO                                               | Instituto Butantan / ESALQ-Piracicaba                                                | Dimas Tadeu Covas, Antonio Jorge Martins, Claudia Renata dos Santos Barros, David Schlesinger, Debora Botequio Moretti, Elaine Cristina Marqueze, Elaine Vieira Santos, Evandra Strazza Rodrigues, Heidge Fukumasu, Jayme Augusto de Souza-Neto, José Salvatore Leister Patané, Luiz Alcantara, Luiz Lehmann Coutinho, Maria Carolina Elias, Maurício Lacerda Nogueira, Rafael dos Santos Bezerra, Raul Machado Neto, Rejane Maria Tommasini Grotto, Ricardo Haddad, Sandra Coccuzzo Sampaio Vessoni, Simone Kashima, Svetoslav Nanev Slavov, Vincent Louis Viala |
| EPI_ISL_2345888                                                                                                                                                                                            | LABORATORIO LOCAL DE ITAPECERICA DA SERRA                                                                 | Instituto Butantan / FZEA-USP-Pirassununga                                           | Dimas Tadeu Covas, Antonio Jorge Martins, Claudia Renata dos Santos Barros, David Schlesinger, Debora Botequio Moretti, Elaine Cristina Marqueze, Elaine Vieira Santos, Evandra Strazza Rodrigues, Heidge Fukumasu, Jayme Augusto de Souza-Neto, José Salvatore Leister Patané, Luiz Alcantara, Luiz Lehmann Coutinho, Maria Carolina Elias, Maurício Lacerda Nogueira, Rafael dos Santos Bezerra, Raul Machado Neto, Rejane Maria Tommasini Grotto, Ricardo Haddad, Sandra Coccuzzo Sampaio Vessoni, Simone Kashima, Svetoslav Nanev Slavov, Vincent Louis Viala |
| EPI_ISL_2346385, EPI_ISL_2346387                                                                                                                                                                           | MRC/UVRI & LSHTM Uganda Research Unit, Central Public Health Laboratories                                 | MRC/UVRI & LSHTM Uganda Research Unit, Central Public Health Laboratories            | Matthew Cotten, Dan Lule Bugembe, My V.T. Phan, Pontiano Kaleebu, Isaac Sseeewanyana, Patrick Semanda, Susan Nabadda                                                                                                                                                                                                                                                                                                                                                                                                                                              |
| EPI_ISL_2346600, EPI_ISL_2346919, EPI_ISL_2346936, EPI_ISL_2346941, EPI_ISL_2347159, EPI_ISL_2347208, EPI_ISL_2348193, EPI_ISL_2348359, EPI_ISL_2348390, EPI_ISL_2348456                                   | Lighthouse Lab in Milton Keynes                                                                           | Wellcome Sanger Institute for the COVID-19 Genomics UK (COG-UK) Consortium           | The Lighthouse Lab in Milton Keynes and Alex Alderton, Roberto Amato, Jeffrey Barrett, Sonia Goncalves, Ewan Harrison, David K. Jackson, Ian Johnston, Dominic Kwiatkowski, Cordelia Langford, John Sillitoe on behalf of the Wellcome Sanger Institute COVID-19 Surveillance Team                                                                                                                                                                                                                                                                                |
| EPI_ISL_2348486                                                                                                                                                                                            | Noguchi Memorial Institute for Medical Research, University of Ghana, Legon, Ghana                        | Institute of Tropical Medicine, Universitätsklinikum Tübingen, Germany               | Bright Adu, Quaneeta Mohhtar, Le Thi Kieu Linh, Sivaramakrishna Rachakonda, Hilda Opoku Frempong, Keren Okyerebea Attiku, Joyce Appiah-Kubi, Joseph Humphrey Kofi Bonney, John Kofi Odoom, Abraham Kwabena Anang, Srinivas-reddy Palleria, Dorothy Yeboah-Manu, Thirumalaisamy P Velavan                                                                                                                                                                                                                                                                          |
| EPI_ISL_2349137                                                                                                                                                                                            | Laboratory of Immunohematology, Division of Hematology                                                    | Greek Genome Center, Biomedical Research Foundation of the Academy of Athens (BRFAA) | Emmanouil Athanasiadis, Giannis Vatsellas, Theodoros Loupis, Katerina Zoi, Athanasia Mouzaki, Dimitrios Thanos                                                                                                                                                                                                                                                                                                                                                                                                                                                    |
| EPI_ISL_2349170, EPI_ISL_2349179                                                                                                                                                                           | Greek Genome Center, Biomedical Research Foundation of the Academy of Athens (BRFAA)                      | Greek Genome Center, Biomedical Research Foundation of the Academy of Athens (BRFAA) | Emmanouil Athanasiadis, Giannis Vatsellas, Theodoros Loupis, Katerina Zoi, Dimitrios Thanos                                                                                                                                                                                                                                                                                                                                                                                                                                                                       |
| EPI_ISL_2349318, EPI_ISL_2349360                                                                                                                                                                           | Central Public Health Laboratory                                                                          | Central Public Health Laboratory                                                     | Kyriaki Tryfinopoulou, Grigoris Spanakos, Olga Pappa et al                                                                                                                                                                                                                                                                                                                                                                                                                                                                                                        |
| EPI_ISL_2349378, EPI_ISL_2349395, EPI_ISL_2349399                                                                                                                                                          | National Reference Centre for Retroviruses                                                                | Central Public Health Laboratory                                                     | Gkikas Magiorkinis et al                                                                                                                                                                                                                                                                                                                                                                                                                                                                                                                                          |
| EPI_ISL_2349683                                                                                                                                                                                            | Pandemic Response Lab - NYC                                                                               | Pandemic Response Lab, R&D                                                           | Henry Lee, Michael Hammerling, Melissa Hopkins, Cybil del Castillo, Shinyoung Clair Kang, William Ward, Pradeep Bugga, Sol Rey, Dylan Law, Katharine Nelson, Haiping Hao, Jon Laurent                                                                                                                                                                                                                                                                                                                                                                             |
| EPI_ISL_2360289, EPI_ISL_2360331                                                                                                                                                                           | Laboratorio di Microbiologia                                                                              | Laboratorio di Microbiologia                                                         | Martinetti Lucchini Gladys, Valeria Spina                                                                                                                                                                                                                                                                                                                                                                                                                                                                                                                         |
| EPI_ISL_2361451                                                                                                                                                                                            | IN State Department of Health Laboratory Services                                                         | IN State Department of Health Laboratory Services                                    | Cassandra Campion, Jamie Yeadon, Brian Pope, Lixia Liu, Kyle Brownlee, Melissa Hindenlang, Mark Glazier                                                                                                                                                                                                                                                                                                                                                                                                                                                           |
| EPI_ISL_2361531                                                                                                                                                                                            | CHU LILLE                                                                                                 | CHU Lille - Laboratoire de Virologie                                                 | AIT YAHYA Emilie, ALIDJINOU Enagnon Kazali, BOCKET Laurence, CREPIN Michel, DEMAY Christophe, ENGELMANN Iika, GEFFROY Sandrine, GUIGON Aurélie, LAMBERT Valérie, LAZREK Mouna, NOBILLIAUX Florian, PREVOST Brigitte, THULLIER Caroline, TINEZ Claire, TCHANTCHOU NJOSSE YANICK                                                                                                                                                                                                                                                                                    |
| EPI_ISL_2361633, EPI_ISL_2361634                                                                                                                                                                           | Viollier AG                                                                                               | Viollier AG                                                                          | Andrea Patrizia Salzmann, Henriette Kurth, Christiane Beckmann, Maurice Redondo, Olivier Kobel, Christoph Noppen                                                                                                                                                                                                                                                                                                                                                                                                                                                  |
| EPI_ISL_2361740                                                                                                                                                                                            | Laboratorio di Microbiologia                                                                              | Laboratorio di Microbiologia                                                         | Martinetti Lucchini Gladys, Valeria Spina                                                                                                                                                                                                                                                                                                                                                                                                                                                                                                                         |
| EPI_ISL_2361905, EPI_ISL_2361918, EPI_ISL_2361924                                                                                                                                                          | Noguchi Memorial Institute for Medical Research, University of Ghana, Legon, Ghana                        | Institute of Tropical Medicine, Universitätsklinikum Tübingen, Germany               | Bright Adu, Quaneeta Mohhtar, Le Thi Kieu Linh, Sivaramakrishna Rachakonda, Hilda Opoku Frempong, Keren Okyerebea Attiku, Joyce Appiah-Kubi, Joseph Humphrey Kofi Bonney, John Kofi Odoom, Abraham Kwabena Anang, Srinivas-reddy Palleria, Dorothy Yeboah-Manu, Thirumalaisamy P Velavan                                                                                                                                                                                                                                                                          |
| EPI_ISL_2362009                                                                                                                                                                                            | Virginia Division of Consolidated Laboratory Services                                                     | Virginia Division of Consolidated Laboratory Services                                | Virginia DCLS                                                                                                                                                                                                                                                                                                                                                                                                                                                                                                                                                     |

|                                                                                                                                                                                                                                                                                                                                                                                                                                                                                                                                                                                                                                                                                                                                                                                                                                                                                                                                                                                                                                                                                                                                                                                                                                                                                                                                                                                                                                                                                                                                                                                                                                                                                                                                                                                                                                                                                                                                                                                                                                                                                                                                                                                                                                                                                                                                                                                                                                                                                                                                                                                                                                                                                                         |                                                                                             |                                                                                             |                                                                                                                                                                                                                                                                                                                                                                                                                             |
|---------------------------------------------------------------------------------------------------------------------------------------------------------------------------------------------------------------------------------------------------------------------------------------------------------------------------------------------------------------------------------------------------------------------------------------------------------------------------------------------------------------------------------------------------------------------------------------------------------------------------------------------------------------------------------------------------------------------------------------------------------------------------------------------------------------------------------------------------------------------------------------------------------------------------------------------------------------------------------------------------------------------------------------------------------------------------------------------------------------------------------------------------------------------------------------------------------------------------------------------------------------------------------------------------------------------------------------------------------------------------------------------------------------------------------------------------------------------------------------------------------------------------------------------------------------------------------------------------------------------------------------------------------------------------------------------------------------------------------------------------------------------------------------------------------------------------------------------------------------------------------------------------------------------------------------------------------------------------------------------------------------------------------------------------------------------------------------------------------------------------------------------------------------------------------------------------------------------------------------------------------------------------------------------------------------------------------------------------------------------------------------------------------------------------------------------------------------------------------------------------------------------------------------------------------------------------------------------------------------------------------------------------------------------------------------------------------|---------------------------------------------------------------------------------------------|---------------------------------------------------------------------------------------------|-----------------------------------------------------------------------------------------------------------------------------------------------------------------------------------------------------------------------------------------------------------------------------------------------------------------------------------------------------------------------------------------------------------------------------|
| EPI_ISL_2362672                                                                                                                                                                                                                                                                                                                                                                                                                                                                                                                                                                                                                                                                                                                                                                                                                                                                                                                                                                                                                                                                                                                                                                                                                                                                                                                                                                                                                                                                                                                                                                                                                                                                                                                                                                                                                                                                                                                                                                                                                                                                                                                                                                                                                                                                                                                                                                                                                                                                                                                                                                                                                                                                                         | Microbiology and Virology Unit, Florence Careggi University Hospital                        | Microbiology and Virology Unit, Florence Careggi University Hospital                        | Vincenzo Di Pilato, Marco Coppi, Fabio Morecchiato, Noemi Aiezza, Ilaria Baccani, Nicla Giovacchini, Alberto Antonelli, Emanuele Gori, Gian Maria Rossolini                                                                                                                                                                                                                                                                 |
| EPI_ISL_2363074, EPI_ISL_2363144                                                                                                                                                                                                                                                                                                                                                                                                                                                                                                                                                                                                                                                                                                                                                                                                                                                                                                                                                                                                                                                                                                                                                                                                                                                                                                                                                                                                                                                                                                                                                                                                                                                                                                                                                                                                                                                                                                                                                                                                                                                                                                                                                                                                                                                                                                                                                                                                                                                                                                                                                                                                                                                                        | National Virus Reference Laboratory                                                         | National Virus Reference Laboratory                                                         | Zoe Yandle, Charlene Bennett, Gabriel Gonzalez, Michael Carr, Jonathan Dean, Cillian F De Gascun                                                                                                                                                                                                                                                                                                                            |
| EPI_ISL_2363327, EPI_ISL_2363360, EPI_ISL_2363365, EPI_ISL_2363404, EPI_ISL_2363405                                                                                                                                                                                                                                                                                                                                                                                                                                                                                                                                                                                                                                                                                                                                                                                                                                                                                                                                                                                                                                                                                                                                                                                                                                                                                                                                                                                                                                                                                                                                                                                                                                                                                                                                                                                                                                                                                                                                                                                                                                                                                                                                                                                                                                                                                                                                                                                                                                                                                                                                                                                                                     | National Virus Reference Laboratory                                                         | National Virus Reference Laboratory                                                         | Fiona Crispie, Calum Walsh, Matthew McCabe, Zoe Yandle, Charlene Bennet, Gabriel Gonzalez, Michael Carr, Jonathan Dean, Paul Cotter, Cillian F De Gascun                                                                                                                                                                                                                                                                    |
| EPI_ISL_2364366, EPI_ISL_2364389, EPI_ISL_2364474                                                                                                                                                                                                                                                                                                                                                                                                                                                                                                                                                                                                                                                                                                                                                                                                                                                                                                                                                                                                                                                                                                                                                                                                                                                                                                                                                                                                                                                                                                                                                                                                                                                                                                                                                                                                                                                                                                                                                                                                                                                                                                                                                                                                                                                                                                                                                                                                                                                                                                                                                                                                                                                       | Public Health Ontario Laboratory                                                            | Public Health Ontario Laboratory                                                            | Vanessa G Allen, Philip Banh, Yao Chen, Richard de Borja, Alireza Eshaghi, Nahuel Fittipaldi, Christine Frantz, Jonathan B Gubbay, Jennifer L Guthrie, Lawrence Heisler, Esha Joshi, Michael Laszloffy, Aimin Li, Michael CY Li, Dean Maxwell, Sandeep Nagra, Samir N Patel, Jared Simpson, Karthikeyan Sivaraman, Ashleigh Sullivan, Yogi Sundaravadanam, Sarah Teatero, Andre Villegas, Matthew Watson, Sandra Zittermann |
| EPI_ISL_2364789, EPI_ISL_2364790, EPI_ISL_2364791, EPI_ISL_2364792, EPI_ISL_2364793, EPI_ISL_2364794, EPI_ISL_2364795, EPI_ISL_2364796, EPI_ISL_2364797, EPI_ISL_2364798, EPI_ISL_2364799, EPI_ISL_2364800, EPI_ISL_2364801, EPI_ISL_2364802, EPI_ISL_2364803, EPI_ISL_2364804, EPI_ISL_2364805, EPI_ISL_2364806, EPI_ISL_2364807, EPI_ISL_2364808, EPI_ISL_2364809, EPI_ISL_2364810, EPI_ISL_2364811, EPI_ISL_2364812, EPI_ISL_2364813, EPI_ISL_2364814, EPI_ISL_2364815, EPI_ISL_2364816, EPI_ISL_2364817, EPI_ISL_2364818, EPI_ISL_2364819, EPI_ISL_2364820, EPI_ISL_2364821, EPI_ISL_2364822, EPI_ISL_2364823, EPI_ISL_2364824, EPI_ISL_2364825, EPI_ISL_2364826, EPI_ISL_2364827, EPI_ISL_2364828, EPI_ISL_2364829, EPI_ISL_2364830, EPI_ISL_2364831, EPI_ISL_2364832, EPI_ISL_2364833, EPI_ISL_2364834, EPI_ISL_2364835, EPI_ISL_2364836, EPI_ISL_2364837, EPI_ISL_2364838, EPI_ISL_2364839, EPI_ISL_2364840, EPI_ISL_2364841, EPI_ISL_2364842, EPI_ISL_2364843, EPI_ISL_2364844, EPI_ISL_2364845, EPI_ISL_2364846, EPI_ISL_2364847, EPI_ISL_2364848, EPI_ISL_2364849, EPI_ISL_2364850, EPI_ISL_2364851, EPI_ISL_2364852, EPI_ISL_2364853, EPI_ISL_2364854, EPI_ISL_2364855, EPI_ISL_2364856, EPI_ISL_2364857, EPI_ISL_2364858, EPI_ISL_2364859, EPI_ISL_2364860, EPI_ISL_2364861, EPI_ISL_2364862, EPI_ISL_2364863, EPI_ISL_2364864, EPI_ISL_2364865, EPI_ISL_2364866, EPI_ISL_2364867, EPI_ISL_2364868, EPI_ISL_2364869, EPI_ISL_2364870, EPI_ISL_2364871, EPI_ISL_2364872, EPI_ISL_2364873, EPI_ISL_2364874, EPI_ISL_2364875, EPI_ISL_2364876, EPI_ISL_2364877, EPI_ISL_2364878, EPI_ISL_2364879, EPI_ISL_2364880, EPI_ISL_2364881, EPI_ISL_2364882, EPI_ISL_2364883, EPI_ISL_2364884, EPI_ISL_2364885, EPI_ISL_2364886, EPI_ISL_2364887, EPI_ISL_2364888, EPI_ISL_2364889, EPI_ISL_2364890, EPI_ISL_2364891, EPI_ISL_2364892, EPI_ISL_2364893, EPI_ISL_2364894, EPI_ISL_2364895, EPI_ISL_2364896, EPI_ISL_2364897, EPI_ISL_2364898, EPI_ISL_2364899, EPI_ISL_2364900, EPI_ISL_2364901, EPI_ISL_2364902, EPI_ISL_2364903, EPI_ISL_2364904, EPI_ISL_2364905, EPI_ISL_2364906, EPI_ISL_2364907, EPI_ISL_2364908, EPI_ISL_2364909, EPI_ISL_2364910, EPI_ISL_2364911, EPI_ISL_2364912, EPI_ISL_2364913, EPI_ISL_2364914, EPI_ISL_2364915, EPI_ISL_2364916, EPI_ISL_2364917, EPI_ISL_2364918, EPI_ISL_2364919, EPI_ISL_2364920, EPI_ISL_2364921, EPI_ISL_2364922, EPI_ISL_2364923, EPI_ISL_2364924, EPI_ISL_2364925, EPI_ISL_2364926, EPI_ISL_2364927, EPI_ISL_2364930, EPI_ISL_2364932, EPI_ISL_2364936, EPI_ISL_2364940, EPI_ISL_2364942, EPI_ISL_2364943, EPI_ISL_2364945, EPI_ISL_2364947, EPI_ISL_2364956, EPI_ISL_2364962, EPI_ISL_2364964, EPI_ISL_2364965, EPI_ISL_2364966, EPI_ISL_2364969 | Emmanouil Athanasiadis, Giannis Vatsellas, Theodoros Loupis, Katerina Zoi, Dimitrios Thanos |                                                                                             |                                                                                                                                                                                                                                                                                                                                                                                                                             |
| see above                                                                                                                                                                                                                                                                                                                                                                                                                                                                                                                                                                                                                                                                                                                                                                                                                                                                                                                                                                                                                                                                                                                                                                                                                                                                                                                                                                                                                                                                                                                                                                                                                                                                                                                                                                                                                                                                                                                                                                                                                                                                                                                                                                                                                                                                                                                                                                                                                                                                                                                                                                                                                                                                                               | Greek Genome Center, Biomedical Research Foundation of the Academy of Athens (BRFAA)        | Greek Genome Center, Biomedical Research Foundation of the Academy of Athens (BRFAA)        | Emmanouil Athanasiadis, Giannis Vatsellas, Theodoros Loupis, Katerina Zoi, Dimitrios Thanos                                                                                                                                                                                                                                                                                                                                 |
| EPI_ISL_2365005, EPI_ISL_2365006, EPI_ISL_2365009, EPI_ISL_2365011, EPI_ISL_2365014, EPI_ISL_2365018, EPI_ISL_2365020, EPI_ISL_2365024, EPI_ISL_2365031, EPI_ISL_2365033, EPI_ISL_2365035, EPI_ISL_2365038, EPI_ISL_2365039, EPI_ISL_2365040, EPI_ISL_2365041, EPI_ISL_2365042, EPI_ISL_2365046, EPI_ISL_2365048, EPI_ISL_2365052, EPI_ISL_2365055, EPI_ISL_2365056, EPI_ISL_2365064, EPI_ISL_2365065, EPI_ISL_2365066, EPI_ISL_2365067, EPI_ISL_2365071, EPI_ISL_2365072, EPI_ISL_2365074, EPI_ISL_2365076, EPI_ISL_2365077, EPI_ISL_2365082, EPI_ISL_2365083, EPI_ISL_2365087, EPI_ISL_2365088, EPI_ISL_2365102, EPI_ISL_2365107, EPI_ISL_2365131, EPI_ISL_2365133, EPI_ISL_2365138, EPI_ISL_2365141, EPI_ISL_2365158, EPI_ISL_2365170, EPI_ISL_2365174, EPI_ISL_2365201, EPI_ISL_2365213, EPI_ISL_2365225                                                                                                                                                                                                                                                                                                                                                                                                                                                                                                                                                                                                                                                                                                                                                                                                                                                                                                                                                                                                                                                                                                                                                                                                                                                                                                                                                                                                                                                                                                                                                                                                                                                                                                                                                                                                                                                                                            | Hellenic National Blood Transfusion Center - EKEA                                           | Greek Genome Center, Biomedical Research Foundation of the Academy of Athens (BRFAA)        | Emmanouil Athanasiadis, Giannis Vatsellas, Theodoros Loupis, Katerina Zoi, Efthimia Petinaki, Kostas Stamoulis, Dimitrios Thanos                                                                                                                                                                                                                                                                                            |
| see above                                                                                                                                                                                                                                                                                                                                                                                                                                                                                                                                                                                                                                                                                                                                                                                                                                                                                                                                                                                                                                                                                                                                                                                                                                                                                                                                                                                                                                                                                                                                                                                                                                                                                                                                                                                                                                                                                                                                                                                                                                                                                                                                                                                                                                                                                                                                                                                                                                                                                                                                                                                                                                                                                               | Laboratory of Clinical Virology                                                             | Greek Genome Center, Biomedical Research Foundation of the Academy of Athens (BRFAA)        | Emmanouil Athanasiadis, Giannis Vatsellas, Theodoros Loupis, Katerina Zoi, George Sourvinos, Dimitrios Thanos                                                                                                                                                                                                                                                                                                               |
| EPI_ISL_2365237, EPI_ISL_2365238, EPI_ISL_2365250, EPI_ISL_2365269, EPI_ISL_2365273, EPI_ISL_2365289                                                                                                                                                                                                                                                                                                                                                                                                                                                                                                                                                                                                                                                                                                                                                                                                                                                                                                                                                                                                                                                                                                                                                                                                                                                                                                                                                                                                                                                                                                                                                                                                                                                                                                                                                                                                                                                                                                                                                                                                                                                                                                                                                                                                                                                                                                                                                                                                                                                                                                                                                                                                    | Laboratory of Immunohematology, Division of Hematology                                      | Greek Genome Center, Biomedical Research Foundation of the Academy of Athens (BRFAA)        | Emmanouil Athanasiadis, Giannis Vatsellas, Theodoros Loupis, Katerina Zoi, Athanasia Mouzaki, Dimitrios Thanos                                                                                                                                                                                                                                                                                                              |
| EPI_ISL_2365302, EPI_ISL_2365303                                                                                                                                                                                                                                                                                                                                                                                                                                                                                                                                                                                                                                                                                                                                                                                                                                                                                                                                                                                                                                                                                                                                                                                                                                                                                                                                                                                                                                                                                                                                                                                                                                                                                                                                                                                                                                                                                                                                                                                                                                                                                                                                                                                                                                                                                                                                                                                                                                                                                                                                                                                                                                                                        | Lighthouse Lab in Milton Keynes                                                             | Wellcome Sanger Institute for the COVID-19 Genomics UK (COG-UK) Consortium                  | The Lighthouse Lab in Milton Keynes and Alex Alderton, Roberto Amato, Jeffrey Barrett, Sonia Goncalves, Ewan Harrison, David K. Jackson, Ian Johnston, Dominic Kwiatkowski, Cordelia Langford, John Sillitoe on behalf of the Wellcome Sanger Institute COVID-19 Surveillance Team                                                                                                                                          |
| EPI_ISL_2366059, EPI_ISL_2366520                                                                                                                                                                                                                                                                                                                                                                                                                                                                                                                                                                                                                                                                                                                                                                                                                                                                                                                                                                                                                                                                                                                                                                                                                                                                                                                                                                                                                                                                                                                                                                                                                                                                                                                                                                                                                                                                                                                                                                                                                                                                                                                                                                                                                                                                                                                                                                                                                                                                                                                                                                                                                                                                        | LABORATOIRE GCS INTER HOSPITALIER                                                           | CHU Purpan - Laboratoire de Virologie - Institut Fédératif de Biologie                      | Latour J., Milhes M., Bulach T., Ranger N., Salin G., Nicot F., Tremeaux P., Donnadieu C., Izopet J.                                                                                                                                                                                                                                                                                                                        |
| EPI_ISL_2367001                                                                                                                                                                                                                                                                                                                                                                                                                                                                                                                                                                                                                                                                                                                                                                                                                                                                                                                                                                                                                                                                                                                                                                                                                                                                                                                                                                                                                                                                                                                                                                                                                                                                                                                                                                                                                                                                                                                                                                                                                                                                                                                                                                                                                                                                                                                                                                                                                                                                                                                                                                                                                                                                                         | LABORATOIRE GCS INTER HOSPITALIER                                                           | CHU Purpan - Laboratoire de Virologie - Institut Fédératif de Biologie                      | Latour J., Milhes M., Bulach T., Ranger N., Salin G., Nicot F., Tremeaux P., Donnadieu C., Izopet J.                                                                                                                                                                                                                                                                                                                        |
| EPI_ISL_2367566, EPI_ISL_2367567, EPI_ISL_2367568, EPI_ISL_2367569, EPI_ISL_2367570, EPI_ISL_2367572, EPI_ISL_2367573, EPI_ISL_2367574, EPI_ISL_2367575, EPI_ISL_2367576, EPI_ISL_2367577, EPI_ISL_2367581                                                                                                                                                                                                                                                                                                                                                                                                                                                                                                                                                                                                                                                                                                                                                                                                                                                                                                                                                                                                                                                                                                                                                                                                                                                                                                                                                                                                                                                                                                                                                                                                                                                                                                                                                                                                                                                                                                                                                                                                                                                                                                                                                                                                                                                                                                                                                                                                                                                                                              | Greek Genome Center, Biomedical Research Foundation of the Academy of Athens (BRFAA)        | Greek Genome Center, Biomedical Research Foundation of the Academy of Athens (BRFAA)        | Emmanouil Athanasiadis, Giannis Vatsellas, Theodoros Loupis, Katerina Zoi, Dimitrios Thanos                                                                                                                                                                                                                                                                                                                                 |
| see above                                                                                                                                                                                                                                                                                                                                                                                                                                                                                                                                                                                                                                                                                                                                                                                                                                                                                                                                                                                                                                                                                                                                                                                                                                                                                                                                                                                                                                                                                                                                                                                                                                                                                                                                                                                                                                                                                                                                                                                                                                                                                                                                                                                                                                                                                                                                                                                                                                                                                                                                                                                                                                                                                               | Hellenic National Blood Transfusion Center - EKEA                                           | Greek Genome Center, Biomedical Research Foundation of the Academy of Athens (BRFAA)        | Emmanouil Athanasiadis, Giannis Vatsellas, Theodoros Loupis, Katerina Zoi, Efthimia Petinaki, Kostas Stamoulis, Dimitrios Thanos                                                                                                                                                                                                                                                                                            |
| EPI_ISL_2367586, EPI_ISL_2367589, EPI_ISL_2367592                                                                                                                                                                                                                                                                                                                                                                                                                                                                                                                                                                                                                                                                                                                                                                                                                                                                                                                                                                                                                                                                                                                                                                                                                                                                                                                                                                                                                                                                                                                                                                                                                                                                                                                                                                                                                                                                                                                                                                                                                                                                                                                                                                                                                                                                                                                                                                                                                                                                                                                                                                                                                                                       | Fulgent Genetics                                                                            | Centers for Disease Control and Prevention Division of Viral Diseases, Pathogen Discovery   | Dakota Howard, Dhvani Batra, Peter W. Cook, Kara Moser, Adrian Paskey, Jason Caravas, Benjamin Rambo-Martin, Shatavia Morrison, Christopher Gulvick, Scott Sammons, Yvette Unoaumrhi, Darlene Wagner, Matthew Schmerer, Harry Gao, Mickey Li, John Gao, Joseph Fierro, Benafsh Sapra, Becky Tsai, Yan Meng, Doreen Ng, James Xie, Clinton R. Paden, Duncan MacCannell                                                       |
| EPI_ISL_2368120, EPI_ISL_2368155                                                                                                                                                                                                                                                                                                                                                                                                                                                                                                                                                                                                                                                                                                                                                                                                                                                                                                                                                                                                                                                                                                                                                                                                                                                                                                                                                                                                                                                                                                                                                                                                                                                                                                                                                                                                                                                                                                                                                                                                                                                                                                                                                                                                                                                                                                                                                                                                                                                                                                                                                                                                                                                                        | Fulgent Genetics                                                                            | Centers for Disease Control and Prevention Division of Viral Diseases, Pathogen Discovery   | Dakota Howard, Dhvani Batra, Peter W. Cook, Kara Moser, Adrian Paskey, Jason Caravas, Benjamin Rambo-Martin, Shatavia Morrison, Christopher Gulvick, Scott Sammons, Yvette Unoaumrhi, Darlene Wagner, Matthew Schmerer, Harry Gao, Mickey Li, John Gao, Joseph Fierro, Benafsh Sapra, Becky Tsai, Yan Meng, Doreen Ng, James Xie, Clinton R. Paden, Duncan MacCannell                                                       |
| EPI_ISL_2369982, EPI_ISL_2369994, EPI_ISL_2370001, EPI_ISL_2370003, EPI_ISL_2370011, EPI_ISL_2370015, EPI_ISL_2370017, EPI_ISL_2370028, EPI_ISL_2370035, EPI_ISL_2370037, EPI_ISL_2370041, EPI_ISL_2370060, EPI_ISL_2370069, EPI_ISL_2370080, EPI_ISL_2370082, EPI_ISL_2370100, EPI_ISL_2370109, EPI_ISL_2370111, EPI_ISL_2370122, EPI_ISL_2370129, EPI_ISL_2370131, EPI_ISL_2370132, EPI_ISL_2370134, EPI_ISL_2370140, EPI_ISL_2370143, EPI_ISL_2370285                                                                                                                                                                                                                                                                                                                                                                                                                                                                                                                                                                                                                                                                                                                                                                                                                                                                                                                                                                                                                                                                                                                                                                                                                                                                                                                                                                                                                                                                                                                                                                                                                                                                                                                                                                                                                                                                                                                                                                                                                                                                                                                                                                                                                                                | Greek Genome Center, Biomedical Research Foundation of the Academy of Athens (BRFAA)        | Greek Genome Center, Biomedical Research Foundation of the Academy of Athens (BRFAA)        | Emmanouil Athanasiadis, Giannis Vatsellas, Theodoros Loupis, Katerina Zoi, Dimitrios Thanos                                                                                                                                                                                                                                                                                                                                 |
| see above                                                                                                                                                                                                                                                                                                                                                                                                                                                                                                                                                                                                                                                                                                                                                                                                                                                                                                                                                                                                                                                                                                                                                                                                                                                                                                                                                                                                                                                                                                                                                                                                                                                                                                                                                                                                                                                                                                                                                                                                                                                                                                                                                                                                                                                                                                                                                                                                                                                                                                                                                                                                                                                                                               | ETHNIKO KENTRO AIMODOSIAS E.K.E.A.                                                          | Greek Genome Center, Biomedical Research Foundation of the Academy of Athens (BRFAA)        | Emmanouil Athanasiadis, Giannis Vatsellas, Theodoros Loupis, Katerina Zoi, Efthimia Petinaki, Kostas Stamoulis, Dimitrios Thanos                                                                                                                                                                                                                                                                                            |
| EPI_ISL_2370311, EPI_ISL_2370344, EPI_ISL_2370373, EPI_ISL_2370380, EPI_ISL_2370410, EPI_ISL_2370459, EPI_ISL_2370479                                                                                                                                                                                                                                                                                                                                                                                                                                                                                                                                                                                                                                                                                                                                                                                                                                                                                                                                                                                                                                                                                                                                                                                                                                                                                                                                                                                                                                                                                                                                                                                                                                                                                                                                                                                                                                                                                                                                                                                                                                                                                                                                                                                                                                                                                                                                                                                                                                                                                                                                                                                   | ETHNIKO KENTRO AIMODOSIAS E.K.E.A.                                                          | Greek Genome Center, Biomedical Research Foundation of the Academy of Athens (BRFAA)        | Emmanouil Athanasiadis, Giannis Vatsellas, Theodoros Loupis, Katerina Zoi, Efthimia Petinaki, Kostas Stamoulis, Dimitrios Thanos                                                                                                                                                                                                                                                                                            |
| EPI_ISL_2370495, EPI_ISL_2370501, EPI_ISL_2370506, EPI_ISL_2370522, EPI_ISL_2370524, EPI_ISL_2370532, EPI_ISL_2370552, EPI_ISL_2370599, EPI_ISL_2370603, EPI_ISL_2370610, EPI_ISL_2370612, EPI_ISL_2370641, EPI_ISL_2370652, EPI_ISL_2370654, EPI_ISL_2370668, EPI_ISL_2370690, EPI_ISL_2370696, EPI_ISL_2370700, EPI_ISL_2370707, EPI_ISL_2370708, EPI_ISL_2370715, EPI_ISL_2370723, EPI_ISL_2370727, EPI_ISL_2370729, EPI_ISL_2370736, EPI_ISL_2370738, EPI_ISL_2370750, EPI_ISL_2370751, EPI_ISL_2370752, EPI_ISL_2370756, EPI_ISL_2370769                                                                                                                                                                                                                                                                                                                                                                                                                                                                                                                                                                                                                                                                                                                                                                                                                                                                                                                                                                                                                                                                                                                                                                                                                                                                                                                                                                                                                                                                                                                                                                                                                                                                                                                                                                                                                                                                                                                                                                                                                                                                                                                                                           | Greek Genome Center, Biomedical Research Foundation of the Academy of Athens (BRFAA)        | Emmanouil Athanasiadis, Giannis Vatsellas, Theodoros Loupis, Katerina Zoi, Dimitrios Thanos |                                                                                                                                                                                                                                                                                                                                                                                                                             |
| see above                                                                                                                                                                                                                                                                                                                                                                                                                                                                                                                                                                                                                                                                                                                                                                                                                                                                                                                                                                                                                                                                                                                                                                                                                                                                                                                                                                                                                                                                                                                                                                                                                                                                                                                                                                                                                                                                                                                                                                                                                                                                                                                                                                                                                                                                                                                                                                                                                                                                                                                                                                                                                                                                                               | Laboratory of Clinical Virology                                                             | Greek Genome Center, Biomedical Research Foundation of the Academy of Athens (BRFAA)        | Emmanouil Athanasiadis, Giannis Vatsellas, Theodoros Loupis, Katerina Zoi, George Sourvinos, Dimitrios Thanos                                                                                                                                                                                                                                                                                                               |
| EPI_ISL_2370777, EPI_ISL_2370791                                                                                                                                                                                                                                                                                                                                                                                                                                                                                                                                                                                                                                                                                                                                                                                                                                                                                                                                                                                                                                                                                                                                                                                                                                                                                                                                                                                                                                                                                                                                                                                                                                                                                                                                                                                                                                                                                                                                                                                                                                                                                                                                                                                                                                                                                                                                                                                                                                                                                                                                                                                                                                                                        | Laboratory of Clinical Virology                                                             | Greek Genome Center, Biomedical Research Foundation of the Academy of Athens (BRFAA)        | Emmanouil Athanasiadis, Giannis Vatsellas, Theodoros Loupis, Katerina Zoi, George Sourvinos, Dimitrios Thanos                                                                                                                                                                                                                                                                                                               |
| EPI_ISL_2370844, EPI_ISL_2370845, EPI_ISL_2370852, EPI_ISL_2370857, EPI_ISL_2370859, EPI_ISL_2370865, EPI_ISL_2370866, EPI_ISL_2370868, EPI_ISL_2370871, EPI_ISL_2370875, EPI_ISL_2370876, EPI_ISL_2370880, EPI_ISL_2370883, EPI_ISL_2370891                                                                                                                                                                                                                                                                                                                                                                                                                                                                                                                                                                                                                                                                                                                                                                                                                                                                                                                                                                                                                                                                                                                                                                                                                                                                                                                                                                                                                                                                                                                                                                                                                                                                                                                                                                                                                                                                                                                                                                                                                                                                                                                                                                                                                                                                                                                                                                                                                                                            | ETHNIKO KENTRO AIMODOSIAS E.K.E.A.                                                          | Greek Genome Center, Biomedical Research Foundation of the Academy of Athens (BRFAA)        | Emmanouil Athanasiadis, Giannis Vatsellas, Theodoros Loupis, Katerina Zoi, Efthimia Petinaki, Kostas Stamoulis, Dimitrios Thanos                                                                                                                                                                                                                                                                                            |
| see above                                                                                                                                                                                                                                                                                                                                                                                                                                                                                                                                                                                                                                                                                                                                                                                                                                                                                                                                                                                                                                                                                                                                                                                                                                                                                                                                                                                                                                                                                                                                                                                                                                                                                                                                                                                                                                                                                                                                                                                                                                                                                                                                                                                                                                                                                                                                                                                                                                                                                                                                                                                                                                                                                               | ETHNIKO KENTRO AIMODOSIAS E.K.E.A.                                                          | Greek Genome Center, Biomedical Research Foundation of the Academy of Athens (BRFAA)        | Emmanouil Athanasiadis, Giannis Vatsellas, Theodoros Loupis, Katerina Zoi, Efthimia Petinaki, Kostas Stamoulis, Dimitrios Thanos                                                                                                                                                                                                                                                                                            |
| EPI_ISL_2370892, EPI_ISL_2370893, EPI_ISL_2370894, EPI_ISL_2370895, EPI_ISL_2370897, EPI_ISL_2370899, EPI_ISL_2370899, EPI_ISL_2370900, EPI_ISL_2370902, EPI_ISL_2370903, EPI_ISL_2370904                                                                                                                                                                                                                                                                                                                                                                                                                                                                                                                                                                                                                                                                                                                                                                                                                                                                                                                                                                                                                                                                                                                                                                                                                                                                                                                                                                                                                                                                                                                                                                                                                                                                                                                                                                                                                                                                                                                                                                                                                                                                                                                                                                                                                                                                                                                                                                                                                                                                                                               | Greek Genome Center, Biomedical Research Foundation of the Academy of Athens (BRFAA)        | Greek Genome Center, Biomedical Research Foundation of the Academy of Athens (BRFAA)        | Emmanouil Athanasiadis, Giannis Vatsellas, Theodoros Loupis, Katerina Zoi, Dimitrios Thanos                                                                                                                                                                                                                                                                                                                                 |
| see above                                                                                                                                                                                                                                                                                                                                                                                                                                                                                                                                                                                                                                                                                                                                                                                                                                                                                                                                                                                                                                                                                                                                                                                                                                                                                                                                                                                                                                                                                                                                                                                                                                                                                                                                                                                                                                                                                                                                                                                                                                                                                                                                                                                                                                                                                                                                                                                                                                                                                                                                                                                                                                                                                               | Greek Genome Center, Biomedical Research Foundation of the Academy of Athens (BRFAA)        | Greek Genome Center, Biomedical Research Foundation of the Academy of Athens (BRFAA)        | Emmanouil Athanasiadis, Giannis Vatsellas, Theodoros Loupis, Katerina Zoi, Dimitrios Thanos                                                                                                                                                                                                                                                                                                                                 |
| EPI_ISL_2370909, EPI_ISL_2370910, EPI_ISL_2370912, EPI_ISL_2370913, EPI_ISL_2370914                                                                                                                                                                                                                                                                                                                                                                                                                                                                                                                                                                                                                                                                                                                                                                                                                                                                                                                                                                                                                                                                                                                                                                                                                                                                                                                                                                                                                                                                                                                                                                                                                                                                                                                                                                                                                                                                                                                                                                                                                                                                                                                                                                                                                                                                                                                                                                                                                                                                                                                                                                                                                     | Clinical and Basic Functional Sciences, Department of Microbiology                          | Greek Genome Center, Biomedical Research Foundation of the Academy of Athens (BRFAA)        | Emmanouil Athanasiadis, Giannis Vatsellas, Theodoros Loupis, Katerina Zoi, Konstantina Gartzonika, Dimitrios Thanos                                                                                                                                                                                                                                                                                                         |
| EPI_ISL_2370918, EPI_ISL_2370924, EPI_ISL_2370931, EPI_ISL_2370933, EPI_ISL_2370937, EPI_ISL_2370940, EPI_ISL_2370942, EPI_ISL_2370948, EPI_ISL_2370950, EPI_ISL_2370957, EPI_ISL_2370993, EPI_ISL_2370998, EPI_ISL_2371003, EPI_ISL_2371007, EPI_ISL_2371011, EPI_ISL_2371031, EPI_ISL_2371034, EPI_ISL_2371038, EPI_ISL_2371048, EPI_ISL_2371059, EPI_ISL_2371061, EPI_ISL_2371063                                                                                                                                                                                                                                                                                                                                                                                                                                                                                                                                                                                                                                                                                                                                                                                                                                                                                                                                                                                                                                                                                                                                                                                                                                                                                                                                                                                                                                                                                                                                                                                                                                                                                                                                                                                                                                                                                                                                                                                                                                                                                                                                                                                                                                                                                                                    | ETHNIKO KENTRO AIMODOSIAS E.K.E.A.                                                          | Greek Genome Center, Biomedical Research Foundation of the Academy of Athens (BRFAA)        | Emmanouil Athanasiadis, Giannis Vatsellas, Theodoros Loupis, Katerina Zoi, Efthimia Petinaki, Kostas Stamoulis, Dimitrios Thanos                                                                                                                                                                                                                                                                                            |
| see above                                                                                                                                                                                                                                                                                                                                                                                                                                                                                                                                                                                                                                                                                                                                                                                                                                                                                                                                                                                                                                                                                                                                                                                                                                                                                                                                                                                                                                                                                                                                                                                                                                                                                                                                                                                                                                                                                                                                                                                                                                                                                                                                                                                                                                                                                                                                                                                                                                                                                                                                                                                                                                                                                               | ETHNIKO KENTRO AIMODOSIAS E.K.E.A.                                                          | Greek Genome Center, Biomedical Research Foundation of the Academy of Athens (BRFAA)        | Emmanouil Athanasiadis, Giannis Vatsellas, Theodoros Loupis, Katerina Zoi, Efthimia Petinaki, Kostas Stamoulis, Dimitrios Thanos                                                                                                                                                                                                                                                                                            |
| EPI_ISL_2371088                                                                                                                                                                                                                                                                                                                                                                                                                                                                                                                                                                                                                                                                                                                                                                                                                                                                                                                                                                                                                                                                                                                                                                                                                                                                                                                                                                                                                                                                                                                                                                                                                                                                                                                                                                                                                                                                                                                                                                                                                                                                                                                                                                                                                                                                                                                                                                                                                                                                                                                                                                                                                                                                                         | Laboratory of Clinical Virology                                                             | Greek Genome Center, Biomedical Research Foundation of the Academy of Athens (BRFAA)        | Emmanouil Athanasiadis, Giannis Vatsellas, Theodoros Loupis, Katerina Zoi, George Sourvinos, Dimitrios Thanos                                                                                                                                                                                                                                                                                                               |
| EPI_ISL_2371100                                                                                                                                                                                                                                                                                                                                                                                                                                                                                                                                                                                                                                                                                                                                                                                                                                                                                                                                                                                                                                                                                                                                                                                                                                                                                                                                                                                                                                                                                                                                                                                                                                                                                                                                                                                                                                                                                                                                                                                                                                                                                                                                                                                                                                                                                                                                                                                                                                                                                                                                                                                                                                                                                         | Clinical and Basic Functional Sciences, Department of                                       | Greek Genome Center, Biomedical Research Foundation of                                      | Emmanouil Athanasiadis, Giannis Vatsellas, Theodoros Loupis, Katerina Zoi, Konstantina Gartzonika, Dimitrios Thanos                                                                                                                                                                                                                                                                                                         |

|                                                                                                                                                                                                                                                                                                                                                                                                                                                                                                                                                                                                                                                                                                                                                                                                                                                                 |                                                                                             |                                                                                                                            |                                                                                                                                                                                                                                                                                                                                                                                                                                                                                                       |
|-----------------------------------------------------------------------------------------------------------------------------------------------------------------------------------------------------------------------------------------------------------------------------------------------------------------------------------------------------------------------------------------------------------------------------------------------------------------------------------------------------------------------------------------------------------------------------------------------------------------------------------------------------------------------------------------------------------------------------------------------------------------------------------------------------------------------------------------------------------------|---------------------------------------------------------------------------------------------|----------------------------------------------------------------------------------------------------------------------------|-------------------------------------------------------------------------------------------------------------------------------------------------------------------------------------------------------------------------------------------------------------------------------------------------------------------------------------------------------------------------------------------------------------------------------------------------------------------------------------------------------|
| EPI_ISL_2371105, EPI_ISL_2371112, EPI_ISL_2371113, EPI_ISL_2371118, EPI_ISL_2371119, EPI_ISL_2371121, EPI_ISL_2371125, EPI_ISL_2371131, EPI_ISL_2371139, EPI_ISL_2371144, EPI_ISL_2371148, EPI_ISL_2371152, EPI_ISL_2371154, EPI_ISL_2371155, EPI_ISL_2371158, EPI_ISL_2371162, EPI_ISL_2371163, EPI_ISL_2371170, EPI_ISL_2371172, EPI_ISL_2371174, EPI_ISL_2371175, EPI_ISL_2371176, EPI_ISL_2371179, EPI_ISL_2371182, EPI_ISL_2371185, EPI_ISL_2371189, EPI_ISL_2371192                                                                                                                                                                                                                                                                                                                                                                                       | Microbiology                                                                                | the Academy of Athens (BRFAA)                                                                                              |                                                                                                                                                                                                                                                                                                                                                                                                                                                                                                       |
| see above                                                                                                                                                                                                                                                                                                                                                                                                                                                                                                                                                                                                                                                                                                                                                                                                                                                       | Greek Genome Center, Biomedical Research Foundation of the Academy of Athens (BRFAA)        | Greek Genome Center, Biomedical Research Foundation of the Academy of Athens (BRFAA)                                       | Emmanouil Athanasiadis, Giannis Vatsellas, Theodoros Loupis, Katerina Zoi, Dimitrios Thanos                                                                                                                                                                                                                                                                                                                                                                                                           |
| EPI_ISL_2371208                                                                                                                                                                                                                                                                                                                                                                                                                                                                                                                                                                                                                                                                                                                                                                                                                                                 | Laboratory of Clinical Virology                                                             | Greek Genome Center, Biomedical Research Foundation of the Academy of Athens (BRFAA)                                       | Emmanouil Athanasiadis, Giannis Vatsellas, Theodoros Loupis, Katerina Zoi, George Sourvinos, Dimitrios Thanos                                                                                                                                                                                                                                                                                                                                                                                         |
| EPI_ISL_2371211, EPI_ISL_2371212, EPI_ISL_2371220, EPI_ISL_2371224, EPI_ISL_2371230, EPI_ISL_2371234, EPI_ISL_2371237, EPI_ISL_2371244, EPI_ISL_2371247, EPI_ISL_2371252, EPI_ISL_2371258, EPI_ISL_2371263, EPI_ISL_2371264, EPI_ISL_2371268, EPI_ISL_2371273, EPI_ISL_2371277, EPI_ISL_2371281, EPI_ISL_2371282, EPI_ISL_2371283, EPI_ISL_2371285, EPI_ISL_2371286, EPI_ISL_2371287, EPI_ISL_2371291, EPI_ISL_2371299, EPI_ISL_2371309, EPI_ISL_2371310, EPI_ISL_2371318, EPI_ISL_2371319, EPI_ISL_2371322, EPI_ISL_2371323, EPI_ISL_2371326, EPI_ISL_2371329, EPI_ISL_2371332, EPI_ISL_2371333, EPI_ISL_2371335, EPI_ISL_2371337, EPI_ISL_2371340, EPI_ISL_2371342, EPI_ISL_2371350, EPI_ISL_2371353, EPI_ISL_2371360, EPI_ISL_2371362, EPI_ISL_2371371, EPI_ISL_2371372, EPI_ISL_2371384, EPI_ISL_2371393, EPI_ISL_2371394, EPI_ISL_2371397, EPI_ISL_2371401 | Greek Genome Center, Biomedical Research Foundation of the Academy of Athens (BRFAA)        | Greek Genome Center, Biomedical Research Foundation of the Academy of Athens (BRFAA)                                       | Emmanouil Athanasiadis, Giannis Vatsellas, Theodoros Loupis, Katerina Zoi, Dimitrios Thanos                                                                                                                                                                                                                                                                                                                                                                                                           |
| see above                                                                                                                                                                                                                                                                                                                                                                                                                                                                                                                                                                                                                                                                                                                                                                                                                                                       | Greek Genome Center, Biomedical Research Foundation of the Academy of Athens (BRFAA)        | Greek Genome Center, Biomedical Research Foundation of the Academy of Athens (BRFAA)                                       | Emmanouil Athanasiadis, Giannis Vatsellas, Theodoros Loupis, Katerina Zoi, Dimitrios Thanos                                                                                                                                                                                                                                                                                                                                                                                                           |
| EPI_ISL_2373997                                                                                                                                                                                                                                                                                                                                                                                                                                                                                                                                                                                                                                                                                                                                                                                                                                                 | Laboratoire Virologie Saint Louis APHP                                                      | Laboratoire Virologie Saint Louis APHP                                                                                     | Maud Salmona, Marie Laure Chaix, Severine Mercier Delarue, Marie Laure Néré, Linda Feghoui, Jérôme Le Goff, Constance Delauguerre, Sophia Achaibou                                                                                                                                                                                                                                                                                                                                                    |
| EPI_ISL_2374182                                                                                                                                                                                                                                                                                                                                                                                                                                                                                                                                                                                                                                                                                                                                                                                                                                                 | Hospital                                                                                    | National Reference Center for Viruses of Respiratory Infections, Institut Pasteur, Paris                                   | Marion Barbet, Sylvie Behillil, Méline Bizard, Angela Brisebarre, Camille Capel, Vincent Enouf, Louise Lefrançois, Frédéric Lemoine, Christophe Malabat, Corinne Maufrais, Etienne Simon-Lorière, Maud Vanpeene, Sylvie Van der Werf, Sandrine Castelain                                                                                                                                                                                                                                              |
| EPI_ISL_2374412                                                                                                                                                                                                                                                                                                                                                                                                                                                                                                                                                                                                                                                                                                                                                                                                                                                 | Hospital                                                                                    | National Reference Center for Viruses of Respiratory Infections, Institut Pasteur, Paris                                   | Marion Barbet, Sylvie Behillil, Méline Bizard, Angela Brisebarre, Camille Capel, Vincent Enouf, Louise Lefrançois, Frédéric Lemoine, Christophe Malabat, Corinne Maufrais, Emmanuelle Pernal, Etienne Simon-Lorière, Maud Vanpeene, Sylvie Van der Werf, Clémence Guillaume                                                                                                                                                                                                                           |
| EPI_ISL_2375017, EPI_ISL_2375057, EPI_ISL_2375062                                                                                                                                                                                                                                                                                                                                                                                                                                                                                                                                                                                                                                                                                                                                                                                                               | Viollier AG                                                                                 | Department of Biosystems Science and Engineering, ETH Zürich                                                               | Christian Beisel, Sarah Nadeau, Chaoran Chen, Ivan Topolsky, Philipp Jablonski, Lara Fuhrmann, David Dreifuss, Katharina Jahn, Rebecca Denes, Mirjam Feldkamp, Ina Nissen, Natascha Santacroce, Elodie Burcklen, Christiane Beckmann, Maurice Redondo, Olivier Kobel, Christoph Noppen, Sophie Seidel, Noemie Santamaria de Souza, Niko Beerenwinkel, Tanja Stadler                                                                                                                                   |
| EPI_ISL_2375241, EPI_ISL_2375317, EPI_ISL_2375325, EPI_ISL_2375362                                                                                                                                                                                                                                                                                                                                                                                                                                                                                                                                                                                                                                                                                                                                                                                              | Viollier AG                                                                                 | Department of Biosystems Science and Engineering, ETH Zürich                                                               | Chaoran Chen, Sarah Nadeau, Catharine Aquino, Ivan Topolsky, Philipp Jablonski, Lara Fuhrmann, David Dreifuss, Katharina Jahn, Daniel Ehram, Isabel Stürmer, Andrea Cabral de Gouvea, Maria Domenica Moccia, Simon Grüter, Timothy Sykes, Lennart Opitz, Griffin White, Laura Neff, Doris Popovic, Andrea Patrignani, Jay Tracy, Ralph Schlapbach, Christiane Beckmann, Maurice Redondo, Olivier Kobel, Christoph Noppen, Sophie Seidel, Noemie Santamaria de Souza, Niko Beerenwinkel, Tanja Stadler |
| EPI_ISL_2375433                                                                                                                                                                                                                                                                                                                                                                                                                                                                                                                                                                                                                                                                                                                                                                                                                                                 | Viollier AG                                                                                 | Department of Biosystems Science and Engineering, ETH Zürich                                                               | Christian Beisel, Sarah Nadeau, Chaoran Chen, Ivan Topolsky, Philipp Jablonski, Lara Fuhrmann, David Dreifuss, Katharina Jahn, Rebecca Denes, Mirjam Feldkamp, Ina Nissen, Natascha Santacroce, Elodie Burcklen, Christiane Beckmann, Maurice Redondo, Olivier Kobel, Christoph Noppen, Sophie Seidel, Noemie Santamaria de Souza, Niko Beerenwinkel, Tanja Stadler                                                                                                                                   |
| EPI_ISL_2376133                                                                                                                                                                                                                                                                                                                                                                                                                                                                                                                                                                                                                                                                                                                                                                                                                                                 | NJDOH, Public Health and Environmental Laboratories                                         | NJ_PHEL                                                                                                                    | Lindsey Bodnar, Shiv K. Verma, Jacquelyn Deverell, Dana Woell, Allison Roder, Byeong Jeong                                                                                                                                                                                                                                                                                                                                                                                                            |
| EPI_ISL_2376170, EPI_ISL_2376180                                                                                                                                                                                                                                                                                                                                                                                                                                                                                                                                                                                                                                                                                                                                                                                                                                | Montana Public Health Laboratory                                                            | Montana Public Health Laboratory                                                                                           | Joy Ritter, Michelle Mozer, Carrie Biskupiak, Deborah Gibson, Michael Dills                                                                                                                                                                                                                                                                                                                                                                                                                           |
| EPI_ISL_2376425                                                                                                                                                                                                                                                                                                                                                                                                                                                                                                                                                                                                                                                                                                                                                                                                                                                 | GA Department of Public Health Laboratory                                                   | Genomics and Discovery, Respiratory Viruses Branch, Division of Viral Diseases, Centers for Disease Control and Prevention | Anna Kelleher, Ying Tao, Yan Li, Jing Zhang, Brian Lynch, Krista Queen, Anna Uehara, Peter Cook, Han Jia Justin Ng, Rachel Marine, Clinton R. Paden, Dhvani Batra, Haibin Wang, Tara Coalter, Jasmine Padilla, Morgan Davis, Mili Sheth, Sarah Nobles, Mark Burroughs, Justin Lee, Adam Retchless, Suxiang Tong                                                                                                                                                                                       |
| EPI_ISL_2376426                                                                                                                                                                                                                                                                                                                                                                                                                                                                                                                                                                                                                                                                                                                                                                                                                                                 | LA Office of Public Health Laboratories                                                     | Genomics and Discovery, Respiratory Viruses Branch, Division of Viral Diseases, Centers for Disease Control and Prevention | Anna Kelleher, Ying Tao, Yan Li, Jing Zhang, Brian Lynch, Krista Queen, Anna Uehara, Peter Cook, Han Jia Justin Ng, Rachel Marine, Clinton R. Paden, Dhvani Batra, Haibin Wang, Tara Coalter, Jasmine Padilla, Morgan Davis, Mili Sheth, Sarah Nobles, Mark Burroughs, Justin Lee, Adam Retchless, Suxiang Tong                                                                                                                                                                                       |
| EPI_ISL_2376598                                                                                                                                                                                                                                                                                                                                                                                                                                                                                                                                                                                                                                                                                                                                                                                                                                                 | M Health Fairview                                                                           | Minnesota Department of Health, Public Health Laboratory                                                                   | Alexandra Lorentz, Jacob Garfin, Matt Plumb, and Xiong Wang                                                                                                                                                                                                                                                                                                                                                                                                                                           |
| EPI_ISL_2376738, EPI_ISL_2376747, EPI_ISL_2376749                                                                                                                                                                                                                                                                                                                                                                                                                                                                                                                                                                                                                                                                                                                                                                                                               | Greek Genome Center, Biomedical Research Foundation of the Academy of Athens (BRFAA)        | Greek Genome Center, Biomedical Research Foundation of the Academy of Athens (BRFAA)                                       | Emmanouil Athanasiadis, Giannis Vatsellas, Theodoros Loupis, Katerina Zoi, Dimitrios Thanos                                                                                                                                                                                                                                                                                                                                                                                                           |
| EPI_ISL_2376778                                                                                                                                                                                                                                                                                                                                                                                                                                                                                                                                                                                                                                                                                                                                                                                                                                                 | Hellenic National Blood Transfusion Center - EKEA                                           | Greek Genome Center, Biomedical Research Foundation of the Academy of Athens (BRFAA)                                       | Emmanouil Athanasiadis, Giannis Vatsellas, Theodoros Loupis, Katerina Zoi, Efhimia Petinaki, Kostas Stamoulis, Dimitrios Thanos                                                                                                                                                                                                                                                                                                                                                                       |
| EPI_ISL_2376810                                                                                                                                                                                                                                                                                                                                                                                                                                                                                                                                                                                                                                                                                                                                                                                                                                                 | Laboratory of Clinical Virology                                                             | Greek Genome Center, Biomedical Research Foundation of the Academy of Athens (BRFAA)                                       | Emmanouil Athanasiadis, Giannis Vatsellas, Theodoros Loupis, Katerina Zoi, George Sourvinos, Dimitrios Thanos                                                                                                                                                                                                                                                                                                                                                                                         |
| EPI_ISL_2376823, EPI_ISL_2376826, EPI_ISL_2376836, EPI_ISL_2376838                                                                                                                                                                                                                                                                                                                                                                                                                                                                                                                                                                                                                                                                                                                                                                                              | Hellenic National Blood Transfusion Center - EKEA                                           | Greek Genome Center, Biomedical Research Foundation of the Academy of Athens (BRFAA)                                       | Emmanouil Athanasiadis, Giannis Vatsellas, Theodoros Loupis, Katerina Zoi, Efhimia Petinaki, Kostas Stamoulis, Dimitrios Thanos                                                                                                                                                                                                                                                                                                                                                                       |
| EPI_ISL_2376847, EPI_ISL_2376848, EPI_ISL_2376849, EPI_ISL_2376850, EPI_ISL_2376851, EPI_ISL_2376852, EPI_ISL_2376853                                                                                                                                                                                                                                                                                                                                                                                                                                                                                                                                                                                                                                                                                                                                           | Greek Genome Center, Biomedical Research Foundation of the Academy of Athens (BRFAA)        | Greek Genome Center, Biomedical Research Foundation of the Academy of Athens (BRFAA)                                       | Emmanouil Athanasiadis, Giannis Vatsellas, Theodoros Loupis, Katerina Zoi, Dimitrios Thanos                                                                                                                                                                                                                                                                                                                                                                                                           |
| EPI_ISL_2376859, EPI_ISL_2376869, EPI_ISL_2376871, EPI_ISL_2376899                                                                                                                                                                                                                                                                                                                                                                                                                                                                                                                                                                                                                                                                                                                                                                                              | Hellenic National Blood Transfusion Center - EKEA                                           | Greek Genome Center, Biomedical Research Foundation of the Academy of Athens (BRFAA)                                       | Emmanouil Athanasiadis, Giannis Vatsellas, Theodoros Loupis, Katerina Zoi, Efhimia Petinaki, Kostas Stamoulis, Dimitrios Thanos                                                                                                                                                                                                                                                                                                                                                                       |
| EPI_ISL_2376938, EPI_ISL_2376940, EPI_ISL_2376949                                                                                                                                                                                                                                                                                                                                                                                                                                                                                                                                                                                                                                                                                                                                                                                                               | Laboratory of Clinical Virology                                                             | Greek Genome Center, Biomedical Research Foundation of the Academy of Athens (BRFAA)                                       | Emmanouil Athanasiadis, Giannis Vatsellas, Theodoros Loupis, Katerina Zoi, George Sourvinos, Dimitrios Thanos                                                                                                                                                                                                                                                                                                                                                                                         |
| EPI_ISL_2376955                                                                                                                                                                                                                                                                                                                                                                                                                                                                                                                                                                                                                                                                                                                                                                                                                                                 | Clinical and Basic Functional Sciences, Department of Microbiology                          | Greek Genome Center, Biomedical Research Foundation of the Academy of Athens (BRFAA)                                       | Emmanouil Athanasiadis, Giannis Vatsellas, Theodoros Loupis, Katerina Zoi, Konstantina Gartzonika, Dimitrios Thanos                                                                                                                                                                                                                                                                                                                                                                                   |
| EPI_ISL_2376962, EPI_ISL_2376971, EPI_ISL_2376976, EPI_ISL_2376987, EPI_ISL_2376988, EPI_ISL_2376991, EPI_ISL_2376994, EPI_ISL_2377011, EPI_ISL_2377013, EPI_ISL_2377019, EPI_ISL_2377026                                                                                                                                                                                                                                                                                                                                                                                                                                                                                                                                                                                                                                                                       | see above                                                                                   | Greek Genome Center, Biomedical Research Foundation of the Academy of Athens (BRFAA)                                       | Emmanouil Athanasiadis, Giannis Vatsellas, Theodoros Loupis, Katerina Zoi, Dimitrios Thanos                                                                                                                                                                                                                                                                                                                                                                                                           |
| EPI_ISL_2377613                                                                                                                                                                                                                                                                                                                                                                                                                                                                                                                                                                                                                                                                                                                                                                                                                                                 | Maryland Genomics, Institute for Genome Sciences, University of Maryland School of Medicine | Maryland Genomics, Institute for Genome Sciences, University of Maryland School of Medicine                                | Tallon, Luke J; Sadzewicz, Lisa D; Humphrys, Mike; Ott, Sandra; Roussey, Holly; Mehta, Aditya; Vavikolanu, Kranthi; Fraser, Claire M; Ravel, Jacques                                                                                                                                                                                                                                                                                                                                                  |
| EPI_ISL_2377719, EPI_ISL_2377721                                                                                                                                                                                                                                                                                                                                                                                                                                                                                                                                                                                                                                                                                                                                                                                                                                | Texas Department of State Health Services (TXDSHS)                                          | Texas Department of State Health Services (TXDSHS)                                                                         | Rashmi Tuladhar, Bonnie Oh, Jenny Zhang, Maliha Rahman, Mayela Pedrueza, Anita Pokharel, Karen Bobier, Lorraine Rodriguez, Myong Koag, Chun Wang, Rachel Lee, Grace Kubin                                                                                                                                                                                                                                                                                                                             |
| EPI_ISL_2379719                                                                                                                                                                                                                                                                                                                                                                                                                                                                                                                                                                                                                                                                                                                                                                                                                                                 | Valais Hospital, Central Institute                                                          | Valais Hospital, Central Institute                                                                                         | Alexis Dumoulin, Lorenzo Cerutti, Henri Pegeot, Melyssa Elies, Deborah Penet, Keith Harshman, Ioannis Xenarios, Emmanouil Dermitzakis                                                                                                                                                                                                                                                                                                                                                                 |
| EPI_ISL_2381058, EPI_ISL_2381123                                                                                                                                                                                                                                                                                                                                                                                                                                                                                                                                                                                                                                                                                                                                                                                                                                | CHU Purpan - Laboratoire de Virologie - Institut Fédératif de Biologie                      | CHU Purpan - Laboratoire de Virologie - Institut Fédératif de Biologie                                                     | Latour J., Milhes M., Bulach T., Ranger N., Salin G., Nicot F., Tremoux P., Donnadieu C., Izopet J.                                                                                                                                                                                                                                                                                                                                                                                                   |
| EPI_ISL_2381935, EPI_ISL_2381944, EPI_ISL_2381952, EPI_ISL_2381954, EPI_ISL_2381963, EPI_ISL_2381983                                                                                                                                                                                                                                                                                                                                                                                                                                                                                                                                                                                                                                                                                                                                                            | New Mexico Department of Health Scientific Laboratory                                       | New Mexico Department of Health Scientific Laboratory                                                                      | Ellie Johnson, D'eldra Malone, Jennifer Benoit, Ratheesh Rajan, Linda Salazar, Keila Gutierrez, Anastacia Griego-Fisher                                                                                                                                                                                                                                                                                                                                                                               |
| EPI_ISL_2382037, EPI_ISL_2382038, EPI_ISL_2382039, EPI_ISL_2382041, EPI_ISL_2382042                                                                                                                                                                                                                                                                                                                                                                                                                                                                                                                                                                                                                                                                                                                                                                             | Institute for Laboratory Diagnostics and Microbiology, Klinikum Klagenfurt am Wörthersee    | Bergthaler laboratory, CeMM Research Center for Molecular Medicine of the Austrian Academy of Sciences                     | Lukas Ender, Anna Schedl, Fabian Amman, Petr Triska, Thomas Penz, Benedikt Agerer, Maelle Le Moing, Michael Schuster, Bekir Erguner, Jan Laine, Martin Senekowitsch, Christoph Bock, Andreas Bergthaler                                                                                                                                                                                                                                                                                               |



|                                                                                                                                                                                                            |                                                                                         |                                                                            |                                                                                                                                                                                                                                                                                                                                                                                                                                                                                                                                                                                                                                                                                                                                                                                                                                                                                                                                                                                                                                |
|------------------------------------------------------------------------------------------------------------------------------------------------------------------------------------------------------------|-----------------------------------------------------------------------------------------|----------------------------------------------------------------------------|--------------------------------------------------------------------------------------------------------------------------------------------------------------------------------------------------------------------------------------------------------------------------------------------------------------------------------------------------------------------------------------------------------------------------------------------------------------------------------------------------------------------------------------------------------------------------------------------------------------------------------------------------------------------------------------------------------------------------------------------------------------------------------------------------------------------------------------------------------------------------------------------------------------------------------------------------------------------------------------------------------------------------------|
| EPI_ISL_2384534, EPI_ISL_2384799                                                                                                                                                                           | Labor Dr. Fenner und Kollegen                                                           | Heinrich Pette Institute, Leibniz Institute for Experimental Virology      | Alexis Robitaille, Thomas Günther, Johannes Knobloch, Martin Aepfelbacher, Nicole Fischer, Adam Grundhoff                                                                                                                                                                                                                                                                                                                                                                                                                                                                                                                                                                                                                                                                                                                                                                                                                                                                                                                      |
| EPI_ISL_2387247                                                                                                                                                                                            | amedes MVZ Hannover                                                                     | Robert Koch Institute                                                      | unknown                                                                                                                                                                                                                                                                                                                                                                                                                                                                                                                                                                                                                                                                                                                                                                                                                                                                                                                                                                                                                        |
| EPI_ISL_2394441, EPI_ISL_2395102                                                                                                                                                                           | Lighthouse Lab in Alderley Park                                                         | Wellcome Sanger Institute for the COVID-19 Genomics UK (COG-UK) Consortium | Jacquelyn Wynn, Mairead Hyland, The Lighthouse Lab in Alderley Park and Alex Alderton, Roberto Amato, Jeffrey Barrett, Sonia Goncalves, Ewan Harrison, David K. Jackson, Ian Johnston, Dominic Kwiatkowski, Cordelia Langford, John Sillitoe on behalf of the Wellcome Sanger Institute COVID-19 Surveillance Team                                                                                                                                                                                                                                                                                                                                                                                                                                                                                                                                                                                                                                                                                                             |
| EPI_ISL_2396851                                                                                                                                                                                            | Randox Laboratories                                                                     | Wellcome Sanger Institute for the COVID-19 Genomics UK (COG-UK) Consortium | Randox Laboratories and Alex Alderton, Roberto Amato, Jeffrey Barrett, Sonia Goncalves, Ewan Harrison, David K. Jackson, Ian Johnston, Dominic Kwiatkowski, Cordelia Langford, John Sillitoe on behalf of the Wellcome Sanger Institute COVID-19 Surveillance Team                                                                                                                                                                                                                                                                                                                                                                                                                                                                                                                                                                                                                                                                                                                                                             |
| EPI_ISL_2399795, EPI_ISL_2399957, EPI_ISL_2399966                                                                                                                                                          | National Virus Reference Laboratory                                                     | National Virus Reference Laboratory                                        | Zoe Yandle, Charlene Bennett, Gabriel Gonzalez, Michael Carr, Jonathan Dean, Cillian F De Gascun                                                                                                                                                                                                                                                                                                                                                                                                                                                                                                                                                                                                                                                                                                                                                                                                                                                                                                                               |
| EPI_ISL_2400054                                                                                                                                                                                            | Dept. of Medical Microbiology, Stavanger University Hospital, Helse Stavanger HF        | Norwegian Institute of Public Health, Department of Virology               | Kathrine Stene-Johansen, Kamilla Heddeland Instefjord, Hilde Elshaug, Garcia Llorente Ignacio, Jon Bråte, Line Victoria Moen, Engebretsen Serina Beate, Pedersen Benedikte Nevjen, Debeck Nadia, Atiya R Ali, Marie Paulsen Madsen, Rasmus Riis Kopperud, Hilde Vollen, Karoline Bragstad, Olav Hungnes                                                                                                                                                                                                                                                                                                                                                                                                                                                                                                                                                                                                                                                                                                                        |
| EPI_ISL_2400256, EPI_ISL_2400257, EPI_ISL_2400258                                                                                                                                                          | Massachusetts State Public Health Laboratory                                            | Massachusetts State Public Health Laboratory                               | Andrew Lang, Timelia Fink, Glen Gallagher, Sandra Smole                                                                                                                                                                                                                                                                                                                                                                                                                                                                                                                                                                                                                                                                                                                                                                                                                                                                                                                                                                        |
| EPI_ISL_2400705                                                                                                                                                                                            | Laboratoires d'analyses medicales - Ketterhill                                          | Laboratoire national de sante, Microbiology, Microbial Genomics Platform   | Anke Wienecke-Baldacchino, Catherine Ragimbeau, Jessica Tapp, Fatu Djabi, Lise Pignon, Raoul Salmon, Serge Vedy, Caroline Scheiber, Tamir Abdelrahman                                                                                                                                                                                                                                                                                                                                                                                                                                                                                                                                                                                                                                                                                                                                                                                                                                                                          |
| EPI_ISL_2400863, EPI_ISL_2400956, EPI_ISL_2400957                                                                                                                                                          | Laboratoires Reunis                                                                     | Laboratoire national de sante, Microbiology, Microbial Genomics Platform   | Anke Wienecke-Baldacchino, Catherine Ragimbeau, Jessica Tapp, Fatu Djabi, Lise Pignon, Raoul Salmon, Bernard Weber, Tamir Abdelrahman                                                                                                                                                                                                                                                                                                                                                                                                                                                                                                                                                                                                                                                                                                                                                                                                                                                                                          |
| EPI_ISL_2401078                                                                                                                                                                                            | Laboratoire national de sante, Microbiology, Virology                                   | Laboratoire national de sante, Microbiology, Microbial Genomics Platform   | Anke Wienecke-Baldacchino, Catherine Ragimbeau, Jessica Tapp, Fatu Djabi, Lise Pignon, Raoul Salmon, Trung Nguyen Nguyen, Tamir Abdelrahman                                                                                                                                                                                                                                                                                                                                                                                                                                                                                                                                                                                                                                                                                                                                                                                                                                                                                    |
| EPI_ISL_2401381, EPI_ISL_2401405, EPI_ISL_2401428, EPI_ISL_2401441, EPI_ISL_2401478, EPI_ISL_2401482, EPI_ISL_2401492, EPI_ISL_2401504, EPI_ISL_2401570, EPI_ISL_2401597, EPI_ISL_2401685, EPI_ISL_2401745 | see above                                                                               | Bionext Lab                                                                | Anke Wienecke-Baldacchino, Catherine Ragimbeau, Jessica Tapp, Fatu Djabi, Lise Pignon, Raoul Salmon, Thibault Ferrandon, Tamir Abdelrahman                                                                                                                                                                                                                                                                                                                                                                                                                                                                                                                                                                                                                                                                                                                                                                                                                                                                                     |
| EPI_ISL_2401792, EPI_ISL_2401801, EPI_ISL_2401804, EPI_ISL_2401816, EPI_ISL_2401817, EPI_ISL_2401820, EPI_ISL_2401853, EPI_ISL_2401854, EPI_ISL_2401874                                                    | Hospital Center Emile Mayrisch                                                          | Laboratoire national de sante, Microbiology, Microbial Genomics Platform   | Anke Wienecke-Baldacchino, Catherine Ragimbeau, Jessica Tapp, Fatu Djabi, Lise Pignon, Raoul Salmon, Cynthia Oxacelay, Tamir Abdelrahman                                                                                                                                                                                                                                                                                                                                                                                                                                                                                                                                                                                                                                                                                                                                                                                                                                                                                       |
| EPI_ISL_2401923                                                                                                                                                                                            | Hospital Center Luxembourg                                                              | Laboratoire national de sante, Microbiology, Microbial Genomics Platform   | Anke Wienecke-Baldacchino, Catherine Ragimbeau, Jessica Tapp, Fatu Djabi, Lise Pignon, Raoul Salmon, Michel Kohnen, Jean-Hugues Francois, Tamir Abdelrahman                                                                                                                                                                                                                                                                                                                                                                                                                                                                                                                                                                                                                                                                                                                                                                                                                                                                    |
| EPI_ISL_2402181                                                                                                                                                                                            | Laboratorio Central de Epidemiologi-a (LCE)                                             | Unidad de Genomica Avanzada                                                | Consortio Mexicano de Vigilancia Genomica (CoViGen-Mex). Authors (in alphabetical order): Julio Elias Alvarado-Yaah, Carlos F. Arias, Santiago Avila-Rios, Victor Hugo Borja-Aburto, Celia Boukadida, Juan Bautista Chale-Dzul, Jose Antonio Enciso-Moreno, Gloria Elena Espinoza-Ayala, Fernando Fontove-Herrera, Concepcion Grajales-Muniz, Ricardo Grande, Alfredo Herrera-Estrella, Carla Ivon Herrera-Najera, Pavel Isa, Brenda Irasema Maldonado-Meza, Bernardo Martinez-Miguel, Margarita Matias-Florentino, Maria Guadalupe de Jesus Mireles-Rivera, Gloria Maria Molina-Salinas, Hector Montoya-Fuentes, Jose Esteban Munoz-Medina, Jose de Jesus Nunez-Contreras, Alicia Ocana-Mondragon, Luis Alberto Ochoa-Carrera, Hector Esteban Paz-Juarez, Francisco Pulido, Helen Haydee Fernanda Ramirez-Plascencia, Angel Gustavo Salas-Lais, Jorge Ivan Salinal-Navarez, Alejandro Sanchez-Flores, Clara Esperanza Santacruz-Tinoco, Maria Guadalupe Santiago-Mauricio, Nelly Selem-Mojica, Blanca Taboada, Gloria Vazquez |
| EPI_ISL_2403241                                                                                                                                                                                            | CHU Pontchaillou                                                                        | CHU Pontchaillou                                                           | GROLHIER Claire, DENOUAL Florent, ETCHÉVERRY Amandine, SASSI Mohamed, JAGLINE Steven, FEBREAU Christine, PRONIER Charlotte, GALIBERT Marie Dominique, DE TAYRAC Marie, THIBAUT Vincent                                                                                                                                                                                                                                                                                                                                                                                                                                                                                                                                                                                                                                                                                                                                                                                                                                         |
| EPI_ISL_2403295, EPI_ISL_2403469, EPI_ISL_2403493                                                                                                                                                          | Ministry of Health Turkey                                                               | Ministry of Health Turkey                                                  | Fatma Bayrakdar, Yasemin Cosgun, Suleyman Yalcin, Gulay Korukluoglu                                                                                                                                                                                                                                                                                                                                                                                                                                                                                                                                                                                                                                                                                                                                                                                                                                                                                                                                                            |
| EPI_ISL_2403913, EPI_ISL_2403989, EPI_ISL_2404123, EPI_ISL_2404259, EPI_ISL_2404492                                                                                                                        | KU Leuven, Rega Institute, Clinical and Epidemiological Virology                        | KU Leuven, Rega Institute, Clinical and Epidemiological Virology           | Tony Wawina-Bokalanga, Bert Vanmechelen, Joan Marti-Carerras, Piet Maes                                                                                                                                                                                                                                                                                                                                                                                                                                                                                                                                                                                                                                                                                                                                                                                                                                                                                                                                                        |
| EPI_ISL_2408105                                                                                                                                                                                            | Center for Laboratory Medicine                                                          | Center for Laboratory Medicine                                             | Yannick Gerth                                                                                                                                                                                                                                                                                                                                                                                                                                                                                                                                                                                                                                                                                                                                                                                                                                                                                                                                                                                                                  |
| EPI_ISL_2415403, EPI_ISL_2418512, EPI_ISL_2418530, EPI_ISL_2418544, EPI_ISL_2418620, EPI_ISL_2418629                                                                                                       | Swedish national genomic surveillance program of SARS-CoV-2                             | The Public Health Agency of Sweden                                         | Maximilian Riess, Maria Lind Karlberg, Alma Brolund, Swedish national genomic surveillance program of SARS-CoV-2                                                                                                                                                                                                                                                                                                                                                                                                                                                                                                                                                                                                                                                                                                                                                                                                                                                                                                               |
| EPI_ISL_2420146, EPI_ISL_2420148                                                                                                                                                                           | Valais Hospital, Central Institute                                                      | Valais Hospital, Central Institute                                         | Alexis Dumoulin, Lorenzo Cerutti, Henri Pegeot, Melyssa Elies, Deborah Penet, Keith Harshman, Ioannis Xenarios, Emmanouil Dermitzakis                                                                                                                                                                                                                                                                                                                                                                                                                                                                                                                                                                                                                                                                                                                                                                                                                                                                                          |
| EPI_ISL_2420674, EPI_ISL_2420691                                                                                                                                                                           | Viollier AG                                                                             | Viollier AG                                                                | Andrea Patrizia Salzmänn, Henriette Kurth, Christiane Beckmann, Maurice Redondo, Olivier Kobel, Christoph Noppen                                                                                                                                                                                                                                                                                                                                                                                                                                                                                                                                                                                                                                                                                                                                                                                                                                                                                                               |
| EPI_ISL_2420989, EPI_ISL_2421025, EPI_ISL_2421026, EPI_ISL_2421037, EPI_ISL_2421257, EPI_ISL_2421259                                                                                                       | Montana Public Health Laboratory                                                        | Montana Public Health Laboratory                                           | Joy Ritter, Michelle Mozer, Carrie Biskupiak, Deborah Gibson, Michael Dills                                                                                                                                                                                                                                                                                                                                                                                                                                                                                                                                                                                                                                                                                                                                                                                                                                                                                                                                                    |
| EPI_ISL_2422335                                                                                                                                                                                            | URMC LABS                                                                               | Wadsworth Center, New York State Department of Health                      | Kirsten St. George, Daryl M. Lamson, Alexis Russell, Matthew Shudt, Melissa A Leisner, Jonathan Plitnick, Catharine Prussing, Navjot Singh, John Kelly, Erasmus Schneider, Erica Lasek-Nesselquist                                                                                                                                                                                                                                                                                                                                                                                                                                                                                                                                                                                                                                                                                                                                                                                                                             |
| EPI_ISL_2422508                                                                                                                                                                                            | West African Centre for Cell Biology of Infectious Pathogen, University of Ghana, Legon | WACCBIP, University of Ghana, Volta Road, Legon, Accra                     | Collins M. Morang'a, Peter K. Quashie, Joyce M. Ngoi, Dominic S. Y. Amuzu, Vincent Appiah, Evelyn B. Quansah, Philip M. Soglo, Violette M'cormack, Samirah Saïd, Frederick Tei-Maya, Edward Danso Fenteng, Patrick Tetteh Ababio, Theophilus Odoom, Emmanuel Kudjo, Joe K. Mutungi, Nicaise T. Ndam, William K. Ampofo, Yaw Bediako, Lucas N. Amenga-Etego and Gordon A. Awandare                                                                                                                                                                                                                                                                                                                                                                                                                                                                                                                                                                                                                                              |
| EPI_ISL_2422541, EPI_ISL_2422543, EPI_ISL_2422564                                                                                                                                                          | West African Centre for Cell Biology of Infectious Pathogen, University of Ghana, Legon | WACCBIP, University of Ghana, Volta Road, Legon, Accra                     | Collins M. Morang'a, Peter K. Quashie, Joyce M. Ngoi, Vincent Appiah, Dominic S. Y. Amuzu, Evelyn B. Quansah, Philip M. Soglo, Violette M'cormack, Samirah Saïd, Ivy A. Asante, Joseph HK Bonney, Evelyn Y. Bonney, John K. Odoom, Nicaise T. Ndam, Frederick Tei-Maya, Mildred Adusei-Poku, Lawrence Ofori-Boadu, Joe K. Mutungi, William K. Ampofo, Yaw Bediako, Lucas N. Amenga-Etego and Gordon A. Awandare                                                                                                                                                                                                                                                                                                                                                                                                                                                                                                                                                                                                                |
| EPI_ISL_2422591, EPI_ISL_2422594, EPI_ISL_2422595, EPI_ISL_2422600, EPI_ISL_2422605, EPI_ISL_2422610, EPI_ISL_2422612, EPI_ISL_2422614, EPI_ISL_2422619, EPI_ISL_2422625                                   | West African Centre for Cell Biology of Infectious Pathogen, University of Ghana, Legon | WACCBIP, University of Ghana, Volta Road, Legon, Accra                     | Collins M. Morang'a, Peter K. Quashie, Joyce M. Ngoi, Dominic S. Y. Amuzu, Vincent Appiah, Evelyn B. Quansah, Philip M. Soglo, Violette M'cormack, Samirah Saïd, Frederick Tei-Maya, Edward Danso Fenteng, Patrick Tetteh Ababio, Theophilus Odoom, Emmanuel Kudjo, Joe K. Mutungi, Nicaise T. Ndam, William K. Ampofo, Yaw Bediako, Lucas N. Amenga-Etego and Gordon A. Awandare                                                                                                                                                                                                                                                                                                                                                                                                                                                                                                                                                                                                                                              |
| EPI_ISL_2424160, EPI_ISL_2424161, EPI_ISL_2424162, EPI_ISL_2424163                                                                                                                                         | Centre de Recherches Médicales de Lambaréné (CERMEL)                                    | Centre de Recherches Médicales de Lambaréné (CERMEL)                       | Gédéon Prince Manouana, Moustapha Nzamba Maloum, Sam O'Neill Oye Bingono, Georjelin Nguema Ondo, Rodrigue Bikangui, Samira Zoa Assoumou, Srinivas reddy Pallerla, Jean Bernard Lekana-Douki, Joël-Fleury Djoba Siawaya, Steffen Borrmann, Thirumalaisamy P. Velavan, Bertrand Lell and Ayola Akim Adegnikia                                                                                                                                                                                                                                                                                                                                                                                                                                                                                                                                                                                                                                                                                                                    |
| EPI_ISL_2424202                                                                                                                                                                                            | UCLA Clinical Micro Lab                                                                 | Los Angeles County PHL                                                     | P. Hemarajata et al.                                                                                                                                                                                                                                                                                                                                                                                                                                                                                                                                                                                                                                                                                                                                                                                                                                                                                                                                                                                                           |
| EPI_ISL_2424457                                                                                                                                                                                            | KU Leuven, Rega Institute, Clinical and Epidemiological Virology                        | KU Leuven, Rega Institute, Clinical and Epidemiological Virology           | Tony Wawina-Bokalanga, Bert Vanmechelen, Joan Marti-Carerras, Piet Maes                                                                                                                                                                                                                                                                                                                                                                                                                                                                                                                                                                                                                                                                                                                                                                                                                                                                                                                                                        |

|                                                                                                                                                                                                                                                                                                                                                                                                                                                                                                                                                                                                                                                                                                                                                                                                                                                                                                                                                                                                                                                                                                                                                                                                                     |                                                                                                 |                                                                                                                                                                                                                                                                                                                                                                                                                             |                                                                                                                                                                                                                                                                                                                                                                                                                                                                                                                                                                    |
|---------------------------------------------------------------------------------------------------------------------------------------------------------------------------------------------------------------------------------------------------------------------------------------------------------------------------------------------------------------------------------------------------------------------------------------------------------------------------------------------------------------------------------------------------------------------------------------------------------------------------------------------------------------------------------------------------------------------------------------------------------------------------------------------------------------------------------------------------------------------------------------------------------------------------------------------------------------------------------------------------------------------------------------------------------------------------------------------------------------------------------------------------------------------------------------------------------------------|-------------------------------------------------------------------------------------------------|-----------------------------------------------------------------------------------------------------------------------------------------------------------------------------------------------------------------------------------------------------------------------------------------------------------------------------------------------------------------------------------------------------------------------------|--------------------------------------------------------------------------------------------------------------------------------------------------------------------------------------------------------------------------------------------------------------------------------------------------------------------------------------------------------------------------------------------------------------------------------------------------------------------------------------------------------------------------------------------------------------------|
| EPI_ISL_2426312, EPI_ISL_2426317                                                                                                                                                                                                                                                                                                                                                                                                                                                                                                                                                                                                                                                                                                                                                                                                                                                                                                                                                                                                                                                                                                                                                                                    | UW Virology Lab                                                                                 | UW Virology Lab                                                                                                                                                                                                                                                                                                                                                                                                             | Pavitra Roychoudhury, Hong Xie, Lasata Shrestha, Tien V. Nguyen, Shah Mohamed Bakhsh, Michelle Lin, Noah R. Baker, Ricardo Perez, Sean Ellis, Nathan Breit, Robert J. Livingston, Mei-Li Huang, Keith R. Jerome, Patrick Mathias, Alexander Greninger                                                                                                                                                                                                                                                                                                              |
| EPI_ISL_2426756                                                                                                                                                                                                                                                                                                                                                                                                                                                                                                                                                                                                                                                                                                                                                                                                                                                                                                                                                                                                                                                                                                                                                                                                     | US Air Force School of Aerospace Medicine                                                       | US Air Force School of Aerospace Medicine                                                                                                                                                                                                                                                                                                                                                                                   | Anthony Fries, Jennifer Meyer, William Gruner, Amanda Javorina, Carol Garrett, Sarah Purves, Clarise Starr, Elizabeth Macias                                                                                                                                                                                                                                                                                                                                                                                                                                       |
| EPI_ISL_2426992                                                                                                                                                                                                                                                                                                                                                                                                                                                                                                                                                                                                                                                                                                                                                                                                                                                                                                                                                                                                                                                                                                                                                                                                     | UC Davis Genome Center and Healthy Davis Together                                               | UC Davis Genome Center                                                                                                                                                                                                                                                                                                                                                                                                      | UC Davis                                                                                                                                                                                                                                                                                                                                                                                                                                                                                                                                                           |
| EPI_ISL_2427218, EPI_ISL_2427229                                                                                                                                                                                                                                                                                                                                                                                                                                                                                                                                                                                                                                                                                                                                                                                                                                                                                                                                                                                                                                                                                                                                                                                    | Austrian Agency for Health and Food Safety (AGES)                                               | Berghthaler laboratory, CeMM Research Center for Molecular Medicine of the Austrian Academy of Sciences                                                                                                                                                                                                                                                                                                                     | Lukas Ender, Anna Schedl, Fabian Amman, Petr Triska, Thomas Penz, Benedikt Agerer, Maelle Le Moing, Michael Schuster, Bekir Erguner, Jan Laine, Martin Senekowitsch, Christoph Bock, Andreas Berghthaler                                                                                                                                                                                                                                                                                                                                                           |
| EPI_ISL_2432694                                                                                                                                                                                                                                                                                                                                                                                                                                                                                                                                                                                                                                                                                                                                                                                                                                                                                                                                                                                                                                                                                                                                                                                                     | UW Virology Lab                                                                                 | UW Virology Lab                                                                                                                                                                                                                                                                                                                                                                                                             | Pavitra Roychoudhury, Hong Xie, Lasata Shrestha, Tien V. Nguyen, Shah Mohamed Bakhsh, Michelle Lin, Noah R. Baker, Ricardo Perez, Sean Ellis, Nathan Breit, Robert J. Livingston, Mei-Li Huang, Keith R. Jerome, Patrick Mathias, Alexander Greninger                                                                                                                                                                                                                                                                                                              |
| EPI_ISL_2433227                                                                                                                                                                                                                                                                                                                                                                                                                                                                                                                                                                                                                                                                                                                                                                                                                                                                                                                                                                                                                                                                                                                                                                                                     | Pathology and Laboratory Medicine Institute, Cleveland Clinic, Ohio, USA                        | Pathology and Laboratory Medicine Institute, Cleveland Clinic, Ohio, USA                                                                                                                                                                                                                                                                                                                                                    | Concetta Peck, Jennifer Starbuck, Joy Nakitandwe, Kristen McDonnell, David Plunkett, Zheng Jin Tu, Jay Brock, Yu-Wei Cheng, Gary Procop, Daniel Rhoads, Daniel H. Farkas, David Bosler                                                                                                                                                                                                                                                                                                                                                                             |
| EPI_ISL_2434970, EPI_ISL_2434971, EPI_ISL_2434974, EPI_ISL_2434980                                                                                                                                                                                                                                                                                                                                                                                                                                                                                                                                                                                                                                                                                                                                                                                                                                                                                                                                                                                                                                                                                                                                                  | Centre de Recherches Médicales de Lambaréné (CERMEL)                                            | Centre de Recherches Médicales de Lambaréné (CERMEL)                                                                                                                                                                                                                                                                                                                                                                        | Gédéon Prince Manouana, Moustapha Nzamba Maloum, Sam O'Neill Oye Bingono, Georjelin Nguema Ondo, Rodrigue Bikangui, Samira Zoa Assoumou, Srinivas reddy Pallerla, Jean Bernard Lekana-Douki, Joël-Fleury Djoba Siawaya, Steffen Bormann, Thirumalaisamy P. Velavan, Bertrand Lell and Ayola Akim Adegnika                                                                                                                                                                                                                                                          |
| EPI_ISL_2435364, EPI_ISL_2435526, EPI_ISL_2437209                                                                                                                                                                                                                                                                                                                                                                                                                                                                                                                                                                                                                                                                                                                                                                                                                                                                                                                                                                                                                                                                                                                                                                   | Lighthouse Lab in Milton Keynes                                                                 | Wellcome Sanger Institute for the COVID-19 Genomics UK (COG-UK) Consortium                                                                                                                                                                                                                                                                                                                                                  | The Lighthouse Lab in Milton Keynes and Alex Alderton, Roberto Amato, Jeffrey Barrett, Sonia Goncalves, Ewan Harrison, David K. Jackson, Ian Johnston, Dominic Kwiatkowski, Cordelia Langford, John Sillitoe on behalf of the Wellcome Sanger Institute COVID-19 Surveillance Team                                                                                                                                                                                                                                                                                 |
| EPI_ISL_2438749, EPI_ISL_2438750                                                                                                                                                                                                                                                                                                                                                                                                                                                                                                                                                                                                                                                                                                                                                                                                                                                                                                                                                                                                                                                                                                                                                                                    | Department of Virology, Istituto Zooprofilattico Sperimentale del Lazio e della Toscana (IZSLT) | Department of General Diagnostics; Department of Virology; Istituto Zooprofilattico Sperimentale del Lazio e della Toscana (IZSLT)                                                                                                                                                                                                                                                                                          | Patricia Alba, Giuseppe Manna, Elena L. Diaconu, Fabiola Feltrin, Raffaella Conti, Teresa Scicluna, Virginia Carfora, Antonella Cersini, Alessia Franco, Antonio Battisti.                                                                                                                                                                                                                                                                                                                                                                                         |
| EPI_ISL_2439190, EPI_ISL_2439218                                                                                                                                                                                                                                                                                                                                                                                                                                                                                                                                                                                                                                                                                                                                                                                                                                                                                                                                                                                                                                                                                                                                                                                    | Servicio Microbiología Hospital La Paz                                                          | Servicio Microbiología Hospital La Paz                                                                                                                                                                                                                                                                                                                                                                                      | Fernando Lázaro, Rubén Cáceres, Jesús Mingorance Cruz, Elie Dahdouh                                                                                                                                                                                                                                                                                                                                                                                                                                                                                                |
| EPI_ISL_2442065                                                                                                                                                                                                                                                                                                                                                                                                                                                                                                                                                                                                                                                                                                                                                                                                                                                                                                                                                                                                                                                                                                                                                                                                     | AZDelta                                                                                         | AZ Delta Medical Laboratories in Roeselare, Belgium                                                                                                                                                                                                                                                                                                                                                                         | Geert Martens, Dieter De Smet, Merijn Vanhee, on behalf of AZ Delta COVID-19 Genomics core (member of Genomic surveillance of SARS-CoV-2 in Belgium network)                                                                                                                                                                                                                                                                                                                                                                                                       |
| EPI_ISL_2442203, EPI_ISL_2442277, EPI_ISL_2442279, EPI_ISL_2442338, EPI_ISL_2442383, EPI_ISL_2442384                                                                                                                                                                                                                                                                                                                                                                                                                                                                                                                                                                                                                                                                                                                                                                                                                                                                                                                                                                                                                                                                                                                | Centre de Recherches Médicales de Lambaréné (CERMEL)                                            | Centre de Recherches Médicales de Lambaréné (CERMEL)                                                                                                                                                                                                                                                                                                                                                                        | Gédéon Prince Manouana, Moustapha Nzamba Maloum, Sam O'Neill Oye Bingono, Georjelin Nguema Ondo, Rodrigue Bikangui, Samira Zoa Assoumou, Srinivas reddy Pallerla, Jean Bernard Lekana-Douki, Joël-Fleury Djoba Siawaya, Steffen Bormann, Thirumalaisamy P. Velavan, Bertrand Lell and Ayola Akim Adegnika                                                                                                                                                                                                                                                          |
| EPI_ISL_2443848, EPI_ISL_2443849                                                                                                                                                                                                                                                                                                                                                                                                                                                                                                                                                                                                                                                                                                                                                                                                                                                                                                                                                                                                                                                                                                                                                                                    | M Health Fairview                                                                               | Minnesota Department of Health, Public Health Laboratory                                                                                                                                                                                                                                                                                                                                                                    | Alexandra Lorentz, Jacob Garfin, Matt Plumb, and Xiong Wang                                                                                                                                                                                                                                                                                                                                                                                                                                                                                                        |
| EPI_ISL_2445546                                                                                                                                                                                                                                                                                                                                                                                                                                                                                                                                                                                                                                                                                                                                                                                                                                                                                                                                                                                                                                                                                                                                                                                                     | PSF DR ANTONIO PIRES DE ALMEIDA PORTO FELIZ                                                     | Instituto Butantan                                                                                                                                                                                                                                                                                                                                                                                                          | Dimas Tadeu Covas, Antonio Jorge Martins, Claudia Renata dos Santos Barros, David Schlesinger, Debora Botequico Moretti, Elaine Cristina Marqueze, Elaine Vieira Santos, Evandra Strazza Rodrigues, Heidge Fukumasu, Jayme Augusto de Souza-Neto, José Salavtero Leister Patané, Luiz Alcantara, Luiz Lehmann Coutinho, Maria Carolina Elias, Maurício Lacerda Nogueira, Rafael dos Santos Bezerra, Raul Machado Neto, Rejane Maria Tommasini Grotto, Ricardo Haddad, Sandra Coccuzzo Sampaio Vessoni, Simone Kashima, Svetoslav Nanev Slavov, Vincent Louis Viala |
| EPI_ISL_2445618, EPI_ISL_2445624, EPI_ISL_2445628, EPI_ISL_2445629, EPI_ISL_2445633                                                                                                                                                                                                                                                                                                                                                                                                                                                                                                                                                                                                                                                                                                                                                                                                                                                                                                                                                                                                                                                                                                                                 | Humboldt County Public Health Laboratory                                                        | Humboldt County Public Health Laboratory                                                                                                                                                                                                                                                                                                                                                                                    | Jeremy Corrigan                                                                                                                                                                                                                                                                                                                                                                                                                                                                                                                                                    |
| EPI_ISL_2446016                                                                                                                                                                                                                                                                                                                                                                                                                                                                                                                                                                                                                                                                                                                                                                                                                                                                                                                                                                                                                                                                                                                                                                                                     | Child Health Research Foundation                                                                | Child Health Research Foundation                                                                                                                                                                                                                                                                                                                                                                                            | CHRF Bangladesh Genomics Team                                                                                                                                                                                                                                                                                                                                                                                                                                                                                                                                      |
| EPI_ISL_2447934, EPI_ISL_2447936                                                                                                                                                                                                                                                                                                                                                                                                                                                                                                                                                                                                                                                                                                                                                                                                                                                                                                                                                                                                                                                                                                                                                                                    | Virology, Universitätsklinikum des Saarlandes                                                   | Epigenetics, Saarland University                                                                                                                                                                                                                                                                                                                                                                                            | Kathrin Kattler, Nastasja Seiwert, Stefan Lohse, Sascha Tierling, Thorsten Pfuhl, Sigrun Smola, Jörn Walter                                                                                                                                                                                                                                                                                                                                                                                                                                                        |
| EPI_ISL_2450290, EPI_ISL_2450294                                                                                                                                                                                                                                                                                                                                                                                                                                                                                                                                                                                                                                                                                                                                                                                                                                                                                                                                                                                                                                                                                                                                                                                    | Max von Pettenkofer Institute, Virology, National Reference Center for Retroviruses, LMU Munich | Laboratory for Functional Genome Analysis; Dept. Genomics; Gene Center of the LMU Munich                                                                                                                                                                                                                                                                                                                                    | Max Muenchhoff; Stefan Krebs; Alexander Graf; Oliver Keppler; Helmut Blum                                                                                                                                                                                                                                                                                                                                                                                                                                                                                          |
| EPI_ISL_2450373                                                                                                                                                                                                                                                                                                                                                                                                                                                                                                                                                                                                                                                                                                                                                                                                                                                                                                                                                                                                                                                                                                                                                                                                     | Ospedale di Genzano - ASL RM 6                                                                  | INMI Lazzaro Spallanzani IRCCS                                                                                                                                                                                                                                                                                                                                                                                              | E Giombini, F Messina, M Rueca, G Bonfiglio, O Butera, CEM Gruber, F Santini, B Bartolini, G Tramini, E Conti, MR Capobianchi, A Di Caro                                                                                                                                                                                                                                                                                                                                                                                                                           |
| EPI_ISL_2450495, EPI_ISL_2450516                                                                                                                                                                                                                                                                                                                                                                                                                                                                                                                                                                                                                                                                                                                                                                                                                                                                                                                                                                                                                                                                                                                                                                                    | WHO National Influenza Centre Russian Federation                                                | WHO National Influenza Centre Russian Federation                                                                                                                                                                                                                                                                                                                                                                            | Andrey Komissarov, Artem Fadeev, Kseniya Komissarova, Oula Mansour, Kirill Varchenko, Mikhail Bakaev, Tamila Musaeva, Maria Timofeeva, Veronika Eder, Maria Pisareva, Nikita Yolshin, Daria Danilenko, Ksenia Safina, Elena Nabieva, Georgii Bazykin, Dmitry Lioznov                                                                                                                                                                                                                                                                                               |
| EPI_ISL_2450547                                                                                                                                                                                                                                                                                                                                                                                                                                                                                                                                                                                                                                                                                                                                                                                                                                                                                                                                                                                                                                                                                                                                                                                                     | City Hospital No 40                                                                             | WHO National Influenza Centre Russian Federation                                                                                                                                                                                                                                                                                                                                                                            | Andrey Komissarov, Artem Fadeev, Kseniya Komissarova, Oula Mansour, Kirill Varchenko, Mikhail Bakaev, Tamila Musaeva, Maria Timofeeva, Veronika Eder, Maria Pisareva, Nikita Yolshin, Daria Danilenko, Olga Shneider, Sergey Scherbak, Ksenia Safina, Elena Nabieva, Georgii Bazykin, Dmitry Lioznov                                                                                                                                                                                                                                                               |
| EPI_ISL_2451650, EPI_ISL_2451778, EPI_ISL_2451781, EPI_ISL_2451814, EPI_ISL_2451819, EPI_ISL_2451822, EPI_ISL_2451863, EPI_ISL_2451865, EPI_ISL_2451875, EPI_ISL_2451887, EPI_ISL_2452014, EPI_ISL_2452029, EPI_ISL_2452101, EPI_ISL_2452128, EPI_ISL_2452131, EPI_ISL_2452136, EPI_ISL_2452151, EPI_ISL_2452153, EPI_ISL_2452156, EPI_ISL_2452183, EPI_ISL_2452188, EPI_ISL_2452195, EPI_ISL_2452212, EPI_ISL_2452486, EPI_ISL_2452487, EPI_ISL_2452490, EPI_ISL_2452496, EPI_ISL_2452497, EPI_ISL_2452506, EPI_ISL_2452507, EPI_ISL_2452511, EPI_ISL_2452517, EPI_ISL_2452521, EPI_ISL_2452522, EPI_ISL_2452546, EPI_ISL_2452559, EPI_ISL_2452612, EPI_ISL_2452613, EPI_ISL_2452714, EPI_ISL_2452889, EPI_ISL_2452976, EPI_ISL_2452993, EPI_ISL_2453050, EPI_ISL_2453051, EPI_ISL_2453057, EPI_ISL_2453098, EPI_ISL_2453110, EPI_ISL_2453112, EPI_ISL_2453122, EPI_ISL_2453235                                                                                                                                                                                                                                                                                                                                    | Public Health Ontario Laboratory                                                                | Vanessa G Allen, Philip Banh, Yao Chen, Richard de Borja, Alireza Eshaghi, Nahuel Fittipaldi, Christine Frantz, Jonathan B Gubbay, Jennifer L Guthrie, Lawrence Heisler, Esha Joshi, Michael Laszloffy, Aimin Li, Michael CY Li, Dean Maxwell, Sandeep Nagra, Samir N Patel, Jared Simpson, Karthikeyan Sivaraman, Ashleigh Sullivan, Yogi Sundaravadanam, Sarah Teatero, Andre Villegas, Matthew Watson, Sandra Zittermann |                                                                                                                                                                                                                                                                                                                                                                                                                                                                                                                                                                    |
| EPI_ISL_2453421, EPI_ISL_2453880, EPI_ISL_2454257, EPI_ISL_2454258, EPI_ISL_2454259, EPI_ISL_2454268, EPI_ISL_2454269                                                                                                                                                                                                                                                                                                                                                                                                                                                                                                                                                                                                                                                                                                                                                                                                                                                                                                                                                                                                                                                                                               | MEPHI, Aix Marseille University                                                                 | MEPHI, Aix Marseille University                                                                                                                                                                                                                                                                                                                                                                                             | Anthony LEVASSEUR                                                                                                                                                                                                                                                                                                                                                                                                                                                                                                                                                  |
| EPI_ISL_2454325                                                                                                                                                                                                                                                                                                                                                                                                                                                                                                                                                                                                                                                                                                                                                                                                                                                                                                                                                                                                                                                                                                                                                                                                     | TriCore Reference Laboratories                                                                  | Center for Global Health, University of New Mexico Health Sciences Center                                                                                                                                                                                                                                                                                                                                                   | Daryl Domman, Kurt Schwalm, Valerie Morley, Cecilia Thompson, Kendra Pesko, Karissa Culbreath, Darrell Dinwiddie                                                                                                                                                                                                                                                                                                                                                                                                                                                   |
| EPI_ISL_2454522, EPI_ISL_2454527                                                                                                                                                                                                                                                                                                                                                                                                                                                                                                                                                                                                                                                                                                                                                                                                                                                                                                                                                                                                                                                                                                                                                                                    | School of Pharmacy, Shenandoah University                                                       | School of Pharmacy, Shenandoah University                                                                                                                                                                                                                                                                                                                                                                                   | Adams,S.M., Harralson,A.F., Kidd,R.S., Sawyer,G.W.                                                                                                                                                                                                                                                                                                                                                                                                                                                                                                                 |
| EPI_ISL_2456177, EPI_ISL_2456895                                                                                                                                                                                                                                                                                                                                                                                                                                                                                                                                                                                                                                                                                                                                                                                                                                                                                                                                                                                                                                                                                                                                                                                    | Lighthouse Lab in Milton Keynes                                                                 | Wellcome Sanger Institute for the COVID-19 Genomics UK (COG-UK) Consortium                                                                                                                                                                                                                                                                                                                                                  | The Lighthouse Lab in Milton Keynes and Alex Alderton, Roberto Amato, Jeffrey Barrett, Sonia Goncalves, Ewan Harrison, David K. Jackson, Ian Johnston, Dominic Kwiatkowski, Cordelia Langford, John Sillitoe on behalf of the Wellcome Sanger Institute COVID-19 Surveillance Team                                                                                                                                                                                                                                                                                 |
| EPI_ISL_2458461                                                                                                                                                                                                                                                                                                                                                                                                                                                                                                                                                                                                                                                                                                                                                                                                                                                                                                                                                                                                                                                                                                                                                                                                     | Utah Public Health Laboratory                                                                   | Utah Public Health Laboratory                                                                                                                                                                                                                                                                                                                                                                                               | Erin L. Young, Kelly F. Oakeson, Tara Gallagher                                                                                                                                                                                                                                                                                                                                                                                                                                                                                                                    |
| EPI_ISL_2462524                                                                                                                                                                                                                                                                                                                                                                                                                                                                                                                                                                                                                                                                                                                                                                                                                                                                                                                                                                                                                                                                                                                                                                                                     | Institute for Infectious Diseases                                                               | Institute for Infectious Diseases                                                                                                                                                                                                                                                                                                                                                                                           | Stefan Neuwenschwander, Christian Baumann, Miguel A Terrazos Miani, Cora Säggerer, Pascal Bittel, Peter Keller, Franziska Suter-Riniker, Stephen L Leib, Alban Ramette                                                                                                                                                                                                                                                                                                                                                                                             |
| EPI_ISL_2462601, EPI_ISL_2462680                                                                                                                                                                                                                                                                                                                                                                                                                                                                                                                                                                                                                                                                                                                                                                                                                                                                                                                                                                                                                                                                                                                                                                                    | Viollier AG                                                                                     | Department of Biosystems Science and Engineering, ETH Zürich                                                                                                                                                                                                                                                                                                                                                                | Chaoran Chen, Sarah Nadeau, Catharine Aquino, Ivan Topolsky, Kim Philipp Jablonski, Lara Fuhrmann, Daniel Ehram, Isabel Stürmer, Andrea Cabral de Gouveia, Maria Domenica Moccia, Simon Grüter, Timothy Sykes, Lennart Opitz, Griffin White, Laura Neff, Doris Popovic, Andrea Patrignani, Jay Tracy, Ralph Schlapbach, Christiane Beckmann, Maurice Redondo, Olivier Kobel, Christoph Noppen, Niko Beerenwinkel, Tanja Stadler                                                                                                                                    |
| EPI_ISL_2462772                                                                                                                                                                                                                                                                                                                                                                                                                                                                                                                                                                                                                                                                                                                                                                                                                                                                                                                                                                                                                                                                                                                                                                                                     | Viollier AG                                                                                     | Department of Biosystems Science and Engineering, ETH Zürich                                                                                                                                                                                                                                                                                                                                                                | Christian Beisel, Sarah Nadeau, Chaoran Chen, Ivan Topolsky, Kim Philipp Jablonski, Lara Fuhrmann, Rebecca Denes, Mirjam Feldkamp, Ina Nissen, Natascha Santacroce, Elodie Burcklen, Christiane Beckmann, Maurice Redondo, Olivier Kobel, Christoph Noppen, Niko Beerenwinkel, Tanja Stadler                                                                                                                                                                                                                                                                       |
| EPI_ISL_2463864, EPI_ISL_2463913, EPI_ISL_2463914, EPI_ISL_2463915, EPI_ISL_2463920, EPI_ISL_2463921, EPI_ISL_2463925, EPI_ISL_2463926, EPI_ISL_2463927, EPI_ISL_2463928, EPI_ISL_2463929, EPI_ISL_2463931, EPI_ISL_2463932, EPI_ISL_2463933, EPI_ISL_2463934, EPI_ISL_2463935, EPI_ISL_2463936, EPI_ISL_2463937, EPI_ISL_2463938, EPI_ISL_2463939, EPI_ISL_2463940, EPI_ISL_2463941, EPI_ISL_2463943, EPI_ISL_2463944, EPI_ISL_2463945, EPI_ISL_2463946, EPI_ISL_2463947, EPI_ISL_2463948, EPI_ISL_2463949, EPI_ISL_2463951, EPI_ISL_2463952, EPI_ISL_2463953, EPI_ISL_2463954, EPI_ISL_2463957, EPI_ISL_2463958, EPI_ISL_2463961, EPI_ISL_2463962, EPI_ISL_2463964, EPI_ISL_2463969, EPI_ISL_2463970, EPI_ISL_2463971, EPI_ISL_2463974, EPI_ISL_2463975, EPI_ISL_2463978, EPI_ISL_2463979, EPI_ISL_2463980, EPI_ISL_2463981, EPI_ISL_2463983, EPI_ISL_2463985, EPI_ISL_2463986, EPI_ISL_2463988, EPI_ISL_2463991, EPI_ISL_2463994, EPI_ISL_2463996, EPI_ISL_2463999, EPI_ISL_2464000, EPI_ISL_2464002, EPI_ISL_2464003, EPI_ISL_2464005, EPI_ISL_2464006, EPI_ISL_2464007, EPI_ISL_2464008, EPI_ISL_2464009, EPI_ISL_2464011, EPI_ISL_2464012, EPI_ISL_2464014, EPI_ISL_2464017, EPI_ISL_2464019, EPI_ISL_2464020 | Public Health Ontario Laboratory                                                                |                                                                                                                                                                                                                                                                                                                                                                                                                             |                                                                                                                                                                                                                                                                                                                                                                                                                                                                                                                                                                    |
| see above                                                                                                                                                                                                                                                                                                                                                                                                                                                                                                                                                                                                                                                                                                                                                                                                                                                                                                                                                                                                                                                                                                                                                                                                           | Central Public Health Lab, National Public Health Organization                                  | Central Public Health Lab, National Public Health Organization                                                                                                                                                                                                                                                                                                                                                              | Kyriaki Tryfinopoulou, Gregory Spanakos et al                                                                                                                                                                                                                                                                                                                                                                                                                                                                                                                      |
| EPI_ISL_2464197                                                                                                                                                                                                                                                                                                                                                                                                                                                                                                                                                                                                                                                                                                                                                                                                                                                                                                                                                                                                                                                                                                                                                                                                     | Labo Analyses Med                                                                               | National Reference Center for Viruses of Respiratory                                                                                                                                                                                                                                                                                                                                                                        | Marion Barbet, Sylvie Behillil, Méline Bizard, Angela Brisebarre, Camille Capel, Vincent Enouf, Louise Lefrançois, Frédéric Lemoine, Christophe Malabat,                                                                                                                                                                                                                                                                                                                                                                                                           |

|                                                                                                                                                 |                                                                                  |                                                                                                                    |                                                                                                                                                                                                                                                                                                                                                                               |
|-------------------------------------------------------------------------------------------------------------------------------------------------|----------------------------------------------------------------------------------|--------------------------------------------------------------------------------------------------------------------|-------------------------------------------------------------------------------------------------------------------------------------------------------------------------------------------------------------------------------------------------------------------------------------------------------------------------------------------------------------------------------|
| EPI_ISL_2465206                                                                                                                                 | Università Federico II - Dipartimento di scienze mediche traslazionali - Napoli  | Infections, Institut Pasteur, Paris<br>TIGEM                                                                       | Corinne Maufrais, Etienne Simon-Lorière, Maud Vanpeene, Sylvie Van der Werf ,GréGoire Potiron<br>Antonio Grimaldi Patrizia Annunziata Francesco Panariello Teresa Giuliano Michele Cennamo Valentina Bouche Chiara Colantuono Lucio Di Filippo<br>Mariano Fiorenza Anna Manfredi Marcello Salvi Giuseppe Portella Andrea Ballabio Davide Cacchiarelli                         |
| EPI_ISL_2465994, EPI_ISL_2466003                                                                                                                | Curative                                                                         | New Mexico Department of Health Scientific Laboratory                                                              | Ellie Johnson, D'eldra Malone, Jennifer Benoit, Linda Salazar, Ratheesh Rajan, Keila Gutierrez, Anastacia Griego-Fisher                                                                                                                                                                                                                                                       |
| EPI_ISL_2466497, EPI_ISL_2466498                                                                                                                | National Institute of Public Health                                              | State Veterinary Institute Prague                                                                                  | Nagy,A.;Jirincova,H;Suri,T;Trnka,D;Vecerova,J                                                                                                                                                                                                                                                                                                                                 |
| EPI_ISL_2466701, EPI_ISL_2466702                                                                                                                | OCME Office Of Chief Medical Examiner                                            | New York City Public Health Laboratory                                                                             | Jade Wang, et al.                                                                                                                                                                                                                                                                                                                                                             |
| EPI_ISL_2466778, EPI_ISL_2466780,<br>EPI_ISL_2466783, EPI_ISL_2466786,<br>EPI_ISL_2466799, EPI_ISL_2466810,<br>EPI_ISL_2466811                  | Labor Berlin Charite Vivantes GmbH / Institut für Virologie                      | Charite Universitätsmedizin Berlin, Institut für Virologie/Labor Berlin                                            | Peter Menzel, Christine Stephan, Rolf Schwarzer, Victor M Corman, Barbara Muhlemann, Terry Jones, Christian Drosten                                                                                                                                                                                                                                                           |
| EPI_ISL_2466840                                                                                                                                 | Fimlab Laboratories                                                              | Fimlab Laboratories                                                                                                | Minna Paloniemi, Leena Huhti, Sara Lehtinen, Bruno Luukinen, Tapio Seiskari, Mauri Keinänen                                                                                                                                                                                                                                                                                   |
| EPI_ISL_2467930                                                                                                                                 | National Institute of Laboratory Medicine and Referral Center                    | Genomic Research Lab, BCSIR                                                                                        | Md. Murshed Hasan Sarkar, Abu Sayeed Mohammad Mahmud, Mohammad Samir Uzzaman, Eshrar Osman, Md. Ahasan Habib, Shahina Akter, Tanjina Akhter Banu, Barna Goswami, Iffat Jahan, Mohammad Mohi Uddin, Md. Kamrul Islam, Tasnim Nafisa, Md. Maruf Ahmed Molla, Mahmuda Yeasmin, Asish Kumar Ghosh, Arifa Akram, Md. Salim Khan                                                    |
| EPI_ISL_2470729                                                                                                                                 | Limbach - MVZ Humangenetik Ulm                                                   | Robert Koch Institute                                                                                              | unknown                                                                                                                                                                                                                                                                                                                                                                       |
| EPI_ISL_2471375, EPI_ISL_2471417                                                                                                                | CENTOGENE Frankfurt Laboratory: Niederlassung Industriepark Höchst               | Robert Koch Institute                                                                                              | unknown                                                                                                                                                                                                                                                                                                                                                                       |
| EPI_ISL_2473305, EPI_ISL_2473340                                                                                                                | State Testing Facility                                                           | Altius Institute for Biomedical Research                                                                           | Daniel Bates, Rebecca Bruders, Michael Buckley, Mark Frerker, Amanda Gale, Clem Green, Muhammad Halimun, Kneshay Harper, Matt Hartman, Alex Isner, Audra Johnson, Jessica Kunder, Lauren Mitchell, Jemma Nelson, Alex Nguyen, Sofia Olsson, Sadie Patraw, Tobias Ragoczy, Joshua Richards, Jean Robinson, Jacob Rodriguez, John Stamatoyannopoulos, Eric Thorland, Julia Wald |
| EPI_ISL_2473938, EPI_ISL_2474020,<br>EPI_ISL_2474105, EPI_ISL_2474132,<br>EPI_ISL_2474160                                                       | Reditus Laboratories                                                             | Reditus Laboratories                                                                                               | Joshua J. Geltz, Ph.D., Robert M. Sgambelluri, Ph.D., Rex Dyer, Ph.D., Cassy Philips, M.S., Alexa Eichelberger, M.S.                                                                                                                                                                                                                                                          |
| EPI_ISL_2477900, EPI_ISL_2478002,<br>EPI_ISL_2478418, EPI_ISL_2478526,<br>EPI_ISL_2478532, EPI_ISL_2478539                                      | Edmonton Provincial Lab                                                          | Public Health Agency of Canada (PHAC) National Microbiology Laboratory                                             | Buss, E, Croxen M, Deo A, Dieu P, Gill K, Ferrato C, Khan F, Koleva P, Li V, Lloyd C, Lynch T, Ma R, Murphy S, Pabbaraju K, Shokoples S, Tipples G, Thayer J, Whitehouse M, Wong A, Yu C, Zelyas N                                                                                                                                                                            |
| EPI_ISL_2478964                                                                                                                                 | The Caribbean Public Health Agency                                               | Carrington Lab, Department of PreClinical Sciences, Faculty of Medical Sciences, The University of the West Indies | Nikita S. D. Sahadeo, Arianne Brown-Jordan, Sarah Hill, Vernie Ramkissoon, Anushka Ramjag, Rhonda Sealey-Thomas, Naresh Nandram, Avery Hinds, Karla Georges, Risha Singh, SueMin Nathaniel, Nuno Faria, Oliver Pybus, Christopher Oura, Gabriel Escobar, Christine V. F. Carrington                                                                                           |
| EPI_ISL_2479106, EPI_ISL_2479120,<br>EPI_ISL_2479293, EPI_ISL_2479314,<br>EPI_ISL_2479411, EPI_ISL_2479457,<br>EPI_ISL_2479818, EPI_ISL_2479825 | Edmonton Provincial Lab                                                          | Public Health Agency of Canada (PHAC) National Microbiology Laboratory                                             | Buss, E, Croxen M, Deo A, Dieu P, Gill K, Ferrato C, Khan F, Koleva P, Li V, Lloyd C, Lynch T, Ma R, Murphy S, Pabbaraju K, Shokoples S, Tipples G, Thayer J, Whitehouse M, Wong A, Yu C, Zelyas N                                                                                                                                                                            |
| EPI_ISL_2479909                                                                                                                                 | LESP Colima                                                                      | Instituto de Diagnostico y Referencia Epidemiologicos (INDRE)                                                      | Claudia Wong-Arambula, Abril Rodriguez-Maldonado, Vanessa Rivero-Arredondo, Ariadna Medina-Benitez, Joaquin Quiroz-Mercado, Sergio Rangel-Guerrero, Natividad Cruz-Ortiz, Tatiana Nunez-Garcia, Gisela Barrera-Badillo, Lucia Hernandez-Rivas, Irma Lopez-Martinez, Ernesto Ramirez-Gonzalez.                                                                                 |
| EPI_ISL_2482476                                                                                                                                 | Dept. of Medical Microbiology, Stavanger University Hospital, Helse Stavanger HF | Norwegian Institute of Public Health, Department of Virology                                                       | Kathrine Stene-Johansen, Kamilla Heddeland Instefjord, Hilde Elshaug, Garcia Llorente Ignacio, Jon Bråte, Engebretsen Serina Beate, Pedersen Benedikte Nevjen, Line Victoria Moen, Debech Nadia, Atiya R Ali, Marie Paulsen Madsen, Rasmus Riis Kopperud, Hilde Vollan, Karoline Bragstad, Olav Hungnes                                                                       |
| EPI_ISL_2482993                                                                                                                                 | LABORATOIRE NOVELAB                                                              | CNR Virus des Infections Respiratoires - France SUD                                                                | Antonin Bal, Gregory Destras, Gwendolyne Burfin, Hadrien Regue, Quentin Semanas, Martine Valette, Bruno Lina, Laurence Josset                                                                                                                                                                                                                                                 |
| EPI_ISL_937654                                                                                                                                  | Lighthouse Lab in Alderley Park                                                  | Wellcome Sanger Institute for the COVID-19 Genomics UK (COG-UK) Consortium                                         | Jacquelyn Wynn, Mairead Hyland, The Lighthouse Lab in Alderley Park and Alex Alderton, Roberto Amato, Sonia Goncalves, Ewan Harrison, David K. Jackson, Ian Johnston, Dominic Kwiatkowski, Cordelia Langford, John Sillitoe on behalf of the Wellcome Sanger Institute COVID-19 Surveillance Team                                                                             |
| EPI_ISL_937926, EPI_ISL_938590                                                                                                                  | Lighthouse Lab in Milton Keynes                                                  | Wellcome Sanger Institute for the COVID-19 Genomics UK (COG-UK) Consortium                                         | The Lighthouse Lab in Milton Keynes and Alex Alderton, Roberto Amato, Sonia Goncalves, Ewan Harrison, David K. Jackson, Ian Johnston, Dominic Kwiatkowski, Cordelia Langford, John Sillitoe on behalf of the Wellcome Sanger Institute COVID-19 Surveillance Team                                                                                                             |
| EPI_ISL_941295                                                                                                                                  | Nigeria Centre for Disease Control (NCDC)                                        | African Centre of Excellence for Genomics of Infectious Diseases (ACEGID), Redeemer's University                   | Oluniyi P.E. et al                                                                                                                                                                                                                                                                                                                                                            |
| EPI_ISL_947768                                                                                                                                  | Lighthouse Lab in Alderley Park                                                  | Wellcome Sanger Institute for the COVID-19 Genomics UK (COG-UK) Consortium                                         | Jacquelyn Wynn, Mairead Hyland, The Lighthouse Lab in Alderley Park and Alex Alderton, Roberto Amato, Sonia Goncalves, Ewan Harrison, David K. Jackson, Ian Johnston, Dominic Kwiatkowski, Cordelia Langford, John Sillitoe on behalf of the Wellcome Sanger Institute COVID-19 Surveillance Team                                                                             |
| EPI_ISL_977547, EPI_ISL_977560,<br>EPI_ISL_977561                                                                                               | Nigeria Centre of Disease Control (NCDC)                                         | African Centre of Excellence for Genomics of Infectious Diseases (ACEGID), Redeemer's University                   | Olawoye I. B. et al                                                                                                                                                                                                                                                                                                                                                           |
| EPI_ISL_985105, EPI_ISL_985106,<br>EPI_ISL_985107                                                                                               | Biorepository and Clinical Virology Laboratory                                   | Ozer Lab                                                                                                           | Ramon Lorenzo-Redondo, Adeola A. Fowotade, Ewan C. Omoruyi, Johnson A. Adeniji, Lacy M. Simons, Judd F. Hultquist, Babafemi O. Taiwo, Olubusuyi M. Adewumi, Egon A. Ozer                                                                                                                                                                                                      |
| EPI_ISL_986813                                                                                                                                  | Lighthouse Lab in Cambridge                                                      | Wellcome Sanger Institute for the COVID-19 Genomics UK (COG-UK) Consortium                                         | Rob Howes, The Lighthouse Lab in Cambridge and Alex Alderton, Roberto Amato, Sonia Goncalves, Ewan Harrison, David K. Jackson, Ian Johnston, Dominic Kwiatkowski, Cordelia Langford, John Sillitoe on behalf of the Wellcome Sanger Institute COVID-19 Surveillance Team ( <a href="http://www.sanger.ac.uk/covid-team">http://www.sanger.ac.uk/covid-team</a> )              |
| EPI_ISL_990786                                                                                                                                  | Lighthouse Lab in Alderley Park                                                  | Wellcome Sanger Institute for the COVID-19 Genomics UK (COG-UK) Consortium                                         | Jacquelyn Wynn, Mairead Hyland, The Lighthouse Lab in Alderley Park and Alex Alderton, Roberto Amato, Sonia Goncalves, Ewan Harrison, David K. Jackson, Ian Johnston, Dominic Kwiatkowski, Cordelia Langford, John Sillitoe on behalf of the Wellcome Sanger Institute COVID-19 Surveillance Team                                                                             |
| EPI_ISL_994887                                                                                                                                  | Pandemic Response Lab - NYC                                                      | Pandemic Response Lab, R&D                                                                                         | Henry Lee, Michael Hammerling, Melissa Hopkins, Cybill del Castillo, William Ward, Pradeep Bugga, Haiping Hao, Jon Laurent                                                                                                                                                                                                                                                    |
